# Supplementary material for: Activity profiling of peptidases in Angiostrongylus costaricensis first-stage larvae and adult worms
Source: PLoS Negl Trop Dis. 2018 Oct 31;12(10):e0006923. doi: 10.1371/journal.pntd.0006923 (PMC6231675; doi:10.1371/journal.pntd.0006923)
Supplement: S1 File — These results were used to determine the cleavage site specificities and to build the Icelogo plots related to the peptidase activity found in A. costaricensis worms. (XLSX) [file pntd.0006923.s001.xlsx]

## Sheet: Raw
AccNumber	Fragment Sequence	Occurrences By Time	Occurrences in matched NECs	Occurrences in unmatched NECs	Best Experimental Score	Best matched NEC Score	Best unmatched NEC Score		Karina_F3.1_0005/Karina_F3.1	Karina_F3.1_0015/Karina_F3.1	Karina_F3.1_0060/Karina_F3.1	Karina_F3.1_0240/Karina_F3.1	Karina_F3.1_1200/Karina_F3.1	Karina_F3.2_0005/Karina_F3.2	Karina_F3.2_0015/Karina_F3.2	Karina_F3.2_0060/Karina_F3.2	Karina_F3.2_0240/Karina_F3.2	Karina_F3.2_1200/Karina_F3.2	Karina_F5.1_0015/Karina_F5.1	Karina_F5.1_0060/Karina_F5.1	Karina_F5.1_0240/Karina_F5.1	Karina_F5.1_1200/Karina_F5.1	Karina_F5.2_0015/Karina_F5.2	Karina_F5.2_0060/Karina_F5.2	Karina_F5.2_0240/Karina_F5.2	Karina_F5.2_1200/Karina_F5.2	Karina_F8.1_0015/Karina_F8.1	Karina_F8.1_0060/Karina_F8.1	Karina_F8.1_0240/Karina_F8.1	Karina_F8.1_1200/Karina_F8.1	Karina_F8.2_0015/Karina_F8.2	Karina_F8.2_0060/Karina_F8.2	Karina_F8.2_0240/Karina_F8.2	Karina_F8.2_1200/Karina_F8.2	Karina_F8.3_0015/Karina_F8.3	Karina_F8.3_0060/Karina_F8.3	Karina_F8.3_0240/Karina_F8.3	Karina_F8.3_1200/Karina_F8.3	Karina_L3.1_0005/Karina_L3.1	Karina_L3.1_0015/Karina_L3.1	Karina_L3.1_0060/Karina_L3.1	Karina_L3.1_0240/Karina_L3.1	Karina_L3.1_1200/Karina_L3.1	Karina_L3.2_0005/Karina_L3.2	Karina_L3.2_0015/Karina_L3.2	Karina_L3.2_0060/Karina_L3.2	Karina_L3.2_0240/Karina_L3.2	Karina_L3.2_1200/Karina_L3.2	Karina_L8.1_0015/Karina_L8.1
TDP001	XXLVATVY	1-1-0-0-0-0-0-0-0-0-1-1-0-0-1-0-0-1-1-1-0-1-0-0-1-0-1-0-1-1-1-1-0-0-1-1-0-0-0-1-0-1-1-1-1-0-1-1-1-1-1-0			31.9	0	0		XXLVATVY	XXLVATVY									XXLVATVY	XXLVATVY			XXLVATVY			XXLVATVY	XXLVATVY	XXLVATVY		XXLVATVY			XXLVATVY		XXLVATVY		XXLVATVY	XXLVATVY	XXLVATVY	XXLVATVY			XXLVATVY	XXLVATVY				XXLVATVY
TDP001	ATVYEFGH	0-0-0-1-1-0-0-0-0-0-0-0-0-0-0-0-0-0-0-0-0-0-0-0-0-0-0-0-0-0-0-0-0-1-0-0-0-0-0-1-1-1-1-2-1-1-1-1-1-1-1-2			27.5	0	0					ATVYEFGH	ATVYEFGH																													ATVYEFGH						ATVYEFGH	ATVYEFGH
TDP001	TVYEFGHI	0-0-0-0-0-0-0-0-0-0-0-0-0-0-0-0-0-0-0-0-0-0-0-0-0-0-0-0-0-0-0-0-0-0-0-0-0-0-0-0-0-0-1-1-0-0-1-1-0-0-0-0			22.9	0	0
TDP001	VYEFGHID	0-0-0-0-0-0-0-0-0-0-0-0-0-0-0-0-0-0-0-0-0-0-0-0-0-0-0-0-0-0-0-0-0-0-0-0-0-0-0-0-0-0-0-0-0-0-0-0-0-0-1-0			15	0	0
TDP001	EFGHIDHM	0-0-0-0-0-0-0-0-0-0-0-0-0-0-0-0-0-0-0-0-0-0-0-0-0-0-0-0-0-0-0-0-0-0-0-0-0-0-0-0-0-0-1-2-0-1-1-4-0-0-0-0			30	0	0
TDP001	FGHIDHMX	0-0-0-0-0-0-0-0-0-0-0-0-0-0-0-0-0-0-0-0-0-0-0-0-0-0-0-0-0-0-0-0-0-0-0-0-0-0-0-0-0-0-0-0-0-0-1-1-0-0-1-0			20.8	0	0
TDP001	GHIDHMXX	1-1-1-1-1-1-0-1-1-1-1-1-1-1-1-0-1-1-1-1-1-0-0-0-0-0-1-0-0-0-0-0-1-1-1-1-1-1-1-1-1-1-2-1-1-1-2-2-1-1-2-2	2 times in 3 NECs		29.8	25.7	0		GHIDHMXX	GHIDHMXX	GHIDHMXX	GHIDHMXX	GHIDHMXX	GHIDHMXX		GHIDHMXX	GHIDHMXX	GHIDHMXX	GHIDHMXX	GHIDHMXX	GHIDHMXX	GHIDHMXX	GHIDHMXX		GHIDHMXX	GHIDHMXX	GHIDHMXX	GHIDHMXX	GHIDHMXX						GHIDHMXX						GHIDHMXX	GHIDHMXX	GHIDHMXX	GHIDHMXX	GHIDHMXX	GHIDHMXX	GHIDHMXX	GHIDHMXX	GHIDHMXX
TDP001	HIDHMXXX	0-0-0-1-1-0-1-0-1-0-0-0-1-0-0-0-0-0-0-0-0-0-0-0-0-0-0-0-0-0-0-0-0-1-1-0-0-0-1-1-0-0-1-0-0-0-0-1-0-0-1-0			34.7	0	0					HIDHMXXX	HIDHMXXX		HIDHMXXX		HIDHMXXX				HIDHMXXX																					HIDHMXXX	HIDHMXXX				HIDHMXXX	HIDHMXXX
TDP001	XLVATVYE	0-0-0-1-1-0-0-0-0-0-0-0-0-0-0-0-0-0-0-0-0-0-0-0-0-0-0-0-0-0-0-0-0-0-0-0-0-0-0-0-0-1-1-2-0-0-1-3-0-1-1-2			33	0	0					XLVATVYE	XLVATVYE
TDP001	XXXLVATV	0-0-0-1-1-1-1-1-0-1-1-1-1-0-0-1-1-1-0-1-1-1-0-0-0-0-0-0-1-1-1-1-0-1-0-1-0-1-0-1-0-1-0-0-1-1-1-3-1-1-1-0			31.9	0	0					XXXLVATV	XXXLVATV	XXXLVATV	XXXLVATV	XXXLVATV		XXXLVATV	XXXLVATV	XXXLVATV	XXXLVATV			XXXLVATV	XXXLVATV	XXXLVATV		XXXLVATV	XXXLVATV	XXXLVATV							XXXLVATV	XXXLVATV	XXXLVATV	XXXLVATV		XXXLVATV		XXXLVATV		XXXLVATV		XXXLVATV
TDP001	LVATVYEF	0-0-0-0-1-0-0-0-0-0-0-0-1-0-0-0-0-0-0-0-0-0-0-0-0-0-0-0-0-0-0-0-0-0-0-0-0-0-0-1-1-1-2-2-1-1-2-3-1-1-2-2			29.5	0	0						LVATVYEF								LVATVYEF																											LVATVYEF	LVATVYEF
TDP001	VATVYEFG	0-0-0-0-1-0-0-0-0-0-0-0-0-0-0-0-0-0-0-0-0-0-0-0-0-0-0-0-0-0-0-0-0-0-0-0-0-0-0-0-1-1-1-1-1-0-1-1-1-1-1-1			30	0	0						VATVYEFG																																				VATVYEFG
--------
TDP001	LVATVYEFGHIDHM	1-1-1-1-1-1-1-1-1-1-1-1-1-1-1-1-1-1-1-1-1-1-1-1-1-1-1-1-1-1-1-1-1-1-1-1-1-1-1-1-1-1-1-1-1-1-1-1-1-1-1-1	3 times in 3 NECs		39.4	37.3	0
TDP001	LVATVYEFGHIDH^m	0-0-0-1-1-0-1-0-1-0-0-0-1-0-0-0-0-0-0-0-0-0-0-0-0-0-0-0-0-0-0-0-0-1-1-0-0-0-1-1-0-0-1-0-0-0-0-0-0-0-1-0			34.7	0	0
TDP001	lva^TVYEFGHIDHM	0-0-0-1-1-0-0-0-0-0-0-0-0-0-0-0-0-0-0-0-0-0-0-0-0-0-0-0-0-0-0-0-0-0-0-0-0-0-0-0-0-1-1-1-0-0-1-1-0-1-1-1			33	0	0
TDP001	LVATVYEFGHID^hm	1-1-1-1-1-1-0-1-1-1-1-1-1-1-1-0-1-1-1-1-1-0-0-0-0-0-1-0-0-0-0-0-1-1-1-1-1-1-1-1-1-1-1-0-1-1-1-0-1-1-1-0	2 times in 3 NECs		29.8	25.7	0
TDP001	l^VATVYEFGHIDHM	0-0-0-1-1-1-1-1-0-1-1-1-1-0-0-1-1-1-0-1-1-1-0-0-0-0-0-0-1-1-1-1-0-1-0-1-0-1-0-1-0-1-0-0-1-1-1-1-1-1-1-0			31.9	0	0
TDP001	LVATVYEFGH^idhm	0-0-0-0-0-0-0-0-0-0-0-0-0-0-0-0-0-0-0-0-0-0-0-0-0-0-0-0-0-0-0-0-0-0-0-0-0-0-0-0-0-0-1-0-0-1-1-1-0-0-0-0			30	0	0
TDP001	lv^ATVYEFGHIDHM	1-1-0-0-0-0-0-0-0-0-1-1-0-0-1-0-0-1-1-1-0-1-0-0-1-0-1-0-1-1-1-1-0-0-1-1-0-0-0-1-0-1-1-1-1-0-1-1-1-1-1-0			31.9	0	0
TDP001	LVATVYEFGHI^dhm	0-0-0-0-0-0-0-0-0-0-0-0-0-0-0-0-0-0-0-0-0-0-0-0-0-0-0-0-0-0-0-0-0-0-0-0-0-0-0-0-0-0-0-0-0-0-1-1-0-0-1-0			20.8	0	0
TDP001	lva^TVYEFGHIDH^m	0-0-0-0-0-0-0-0-0-0-0-0-0-0-0-0-0-0-0-0-0-0-0-0-0-0-0-0-0-0-0-0-0-0-0-0-0-0-0-0-0-0-0-0-0-0-0-1-0-0-0-0			24.1	0	0
TDP001	lvatv^YEFGHIDHM	0-0-0-0-1-0-0-0-0-0-0-0-0-0-0-0-0-0-0-0-0-0-0-0-0-0-0-0-0-0-0-0-0-0-0-0-0-0-0-0-1-1-1-1-1-0-1-1-1-1-1-1			30	0	0
TDP001	lvat^VYEFGHIDHM	0-0-0-0-1-0-0-0-0-0-0-0-1-0-0-0-0-0-0-0-0-0-0-0-0-0-0-0-0-0-0-0-0-0-0-0-0-0-0-1-1-1-1-0-1-1-1-1-1-1-1-1			29.5	0	0
TDP001	lva^TVYEFGHID^hm	0-0-0-0-0-0-0-0-0-0-0-0-0-0-0-0-0-0-0-0-0-0-0-0-0-0-0-0-0-0-0-0-0-0-0-0-0-0-0-0-0-0-0-0-0-0-0-0-0-0-0-1			19.8	0	0
TDP001	lvatvy^EFGHIDHM	0-0-0-1-1-0-0-0-0-0-0-0-0-0-0-0-0-0-0-0-0-0-0-0-0-0-0-0-0-0-0-0-0-1-0-0-0-0-0-1-1-1-1-2-1-1-1-1-1-1-1-2			27.5	0	0
TDP001	l^VATVYEFGH^idhm	0-0-0-0-0-0-0-0-0-0-0-0-0-0-0-0-0-0-0-0-0-0-0-0-0-0-0-0-0-0-0-0-0-0-0-0-0-0-0-0-0-0-0-0-0-0-0-1-0-0-0-0			17.6	0	0
TDP001	lva^TVYEFGH^idhm	0-0-0-0-0-0-0-0-0-0-0-0-0-0-0-0-0-0-0-0-0-0-0-0-0-0-0-0-0-0-0-0-0-0-0-0-0-0-0-0-0-0-0-1-0-0-0-1-0-0-0-0			18.7	0	0
TDP001	l^VATVYEFGHID^hm	0-0-0-0-0-0-0-0-0-0-0-0-0-0-0-0-0-0-0-0-0-0-0-0-0-0-0-0-0-0-0-0-0-0-0-0-0-0-0-0-0-0-0-0-0-0-0-1-0-0-0-0			15.7	0	0
TDP001	lvat^VYEFGHID^hm	0-0-0-0-0-0-0-0-0-0-0-0-0-0-0-0-0-0-0-0-0-0-0-0-0-0-0-0-0-0-0-0-0-0-0-0-0-0-0-0-0-0-1-1-0-0-1-1-0-0-1-1			19.5	0	0
TDP001	lvat^VYEFGH^idhm	0-0-0-0-0-0-0-0-0-0-0-0-0-0-0-0-0-0-0-0-0-0-0-0-0-0-0-0-0-0-0-0-0-0-0-0-0-0-0-0-0-0-0-1-0-0-0-1-0-0-0-0			17.3	0	0
TDP001	lvatvye^FGHIDHM	0-0-0-0-0-0-0-0-0-0-0-0-0-0-0-0-0-0-0-0-0-0-0-0-0-0-0-0-0-0-0-0-0-0-0-0-0-0-0-0-0-0-1-1-0-0-1-1-0-0-0-0			22.9	0	0
TDP001	lvatvyef^GHIDHM	0-0-0-0-0-0-0-0-0-0-0-0-0-0-0-0-0-0-0-0-0-0-0-0-0-0-0-0-0-0-0-0-0-0-0-0-0-0-0-0-0-0-0-0-0-0-0-0-0-0-1-0			15	0	0
TDP002	XXMLDKLM	0-0-0-0-0-0-0-0-0-0-0-0-0-0-0-0-0-0-0-0-0-0-0-0-0-0-1-0-0-0-0-0-0-0-0-0-0-0-0-1-0-2-2-0-0-1-2-2-1-1-1-0			35.8	0	0																												XXMLDKLM													XXMLDKLM
TDP002	WPQRRGMX	0-0-0-0-0-0-0-0-0-0-0-0-0-1-0-0-1-0-0-0-0-1-0-0-0-0-0-0-0-0-0-0-0-0-0-0-0-0-0-0-2-2-4-1-1-2-3-4-1-2-2-1			43.1	0	0															WPQRRGMX			WPQRRGMX					WPQRRGMX																			WPQRRGMX
TDP002	PQRRGMXX	0-0-0-0-0-0-0-0-0-0-0-1-1-1-0-0-0-0-0-0-0-0-0-0-0-0-0-0-0-0-0-0-0-0-0-0-0-0-0-0-2-5-2-1-1-1-5-2-3-5-4-1			46.8	0	0													PQRRGMXX	PQRRGMXX	PQRRGMXX																											PQRRGMXX
TDP002	XMLDKLMN	0-0-0-0-0-0-0-0-0-0-0-0-0-0-0-0-0-0-0-0-0-0-0-0-0-0-0-0-0-0-0-0-0-0-0-0-0-0-0-0-0-1-0-0-0-0-1-0-0-1-1-0			20.3	0	0
TDP002	XXXMLDKL	0-0-0-0-0-0-0-0-0-0-0-0-0-0-0-0-0-0-0-1-0-1-0-0-0-0-0-0-0-0-0-1-0-0-0-0-0-0-0-0-1-2-0-0-1-0-1-0-1-1-0-0			25.1	0	0																					XXXMLDKL		XXXMLDKL										XXXMLDKL									XXXMLDKL
TDP002	KLMNWPQR	0-0-0-0-0-0-0-0-0-0-0-0-0-1-0-0-0-0-0-0-0-0-0-0-0-0-0-0-0-0-0-0-0-0-0-0-0-0-0-0-0-0-0-0-0-1-1-1-0-0-0-0			16.4	0	0															KLMNWPQR
TDP002	NWPQRRGM	0-0-0-0-0-0-0-0-0-0-0-0-0-0-0-0-0-0-0-0-0-0-0-0-0-0-0-0-0-0-0-0-0-0-0-0-0-0-0-0-1-1-0-0-0-0-1-0-1-1-0-0			22.2	0	0																																										NWPQRRGM
TDP002	QRRGMXXX	0-0-0-0-0-0-1-0-0-0-0-1-1-1-0-0-1-0-0-0-0-0-0-0-0-0-0-0-0-0-0-0-0-0-0-0-0-0-0-1-0-0-0-0-0-1-0-0-0-0-0-0			26.7	0	0								QRRGMXXX					QRRGMXXX	QRRGMXXX	QRRGMXXX			QRRGMXXX																							QRRGMXXX
TDP002	MLDKLMNW	0-0-0-0-0-0-0-0-0-0-0-0-0-0-0-0-0-0-0-0-0-0-0-0-0-0-0-0-0-0-0-0-0-0-0-0-0-0-0-0-0-0-1-0-0-1-3-1-0-0-0-0			21.9	0	0
TDP002	LDKLMNWP	0-0-0-0-1-0-0-0-0-0-0-0-0-0-0-0-0-0-0-0-0-0-0-0-0-0-0-0-0-0-0-0-0-0-0-0-0-0-0-0-3-2-2-1-1-2-3-2-2-3-2-2			24.5	0	0						LDKLMNWP																																				LDKLMNWP
--------
TDP002	MLDKLMNWPQRR^gm	0-0-0-0-0-0-0-0-0-0-0-1-1-1-0-0-0-0-0-0-0-0-0-0-0-0-0-0-0-0-0-0-0-0-0-0-0-0-0-0-1-1-0-1-1-1-1-0-1-1-1-0			46.8	0	0
TDP002	MLDKLMNWPQR^rgm	0-0-0-0-0-0-0-0-0-0-0-0-0-1-0-0-1-0-0-0-0-1-0-0-0-0-0-0-0-0-0-0-0-0-0-0-0-0-0-0-1-1-1-0-1-1-1-1-1-1-1-0			43.1	0	0
TDP002	MLDKLMNWPQRRGM	1-1-1-1-1-1-1-1-1-1-1-1-1-1-1-1-1-1-1-1-1-1-1-1-1-1-1-1-1-1-1-1-1-1-1-1-1-1-1-1-1-1-0-0-1-1-1-0-1-1-0-0	3 times in 3 NECs		34.8	31.5	0
TDP002	ml^DKLMNWPQRR^gm	0-0-0-0-0-0-0-0-0-0-0-0-0-0-0-0-0-0-0-0-0-0-0-0-0-0-0-0-0-0-0-0-0-0-0-0-0-0-0-0-0-1-1-0-0-0-1-1-0-1-1-0			35.8	0	0
TDP002	MLDKLMNWPQRRG^m	0-0-0-0-0-0-1-0-0-0-0-1-1-1-0-0-1-0-0-0-0-0-0-0-0-0-0-0-0-0-0-0-0-0-0-0-0-0-0-1-0-0-0-0-0-1-0-0-0-0-0-0			26.7	0	0
TDP002	m^LDKLMNWPQRR^gm	0-0-0-0-0-0-0-0-0-0-0-0-0-0-0-0-0-0-0-0-0-0-0-0-0-0-0-0-0-0-0-0-0-0-0-0-0-0-0-0-0-1-0-0-0-0-0-0-1-1-0-0			25.1	0	0
TDP002	ml^DKLMNWPQR^rgm	0-0-0-0-0-0-0-0-0-0-0-0-0-0-0-0-0-0-0-0-0-0-0-0-0-0-0-0-0-0-0-0-0-0-0-0-0-0-0-0-0-0-1-0-0-0-0-1-0-0-0-0			25.2	0	0
TDP002	mldkl^MNWPQRR^gm	0-0-0-0-0-0-0-0-0-0-0-0-0-0-0-0-0-0-0-0-0-0-0-0-0-0-0-0-0-0-0-0-0-0-0-0-0-0-0-0-1-1-1-0-0-0-1-1-1-1-1-1			23.6	0	0
TDP002	m^LDKLMNWPQRRGM	0-0-0-0-0-0-0-0-0-0-0-0-0-0-0-0-0-0-0-1-0-1-0-0-0-0-0-0-0-0-0-1-0-0-0-0-0-0-0-0-1-1-0-0-1-0-1-0-0-0-0-0			21.3	0	0
TDP002	ml^DKLMNWPQRRGM	0-0-0-0-0-0-0-0-0-0-0-0-0-0-0-0-0-0-0-0-0-0-0-0-0-0-1-0-0-0-0-0-0-0-0-0-0-0-0-1-0-1-0-0-0-1-1-0-1-0-0-0			24.2	0	0
TDP002	mldkl^MNWPQR^rgm	0-0-0-0-0-0-0-0-0-0-0-0-0-0-0-0-0-0-0-0-0-0-0-0-0-0-0-0-0-0-0-0-0-0-0-0-0-0-0-0-1-1-1-1-0-1-1-1-0-1-1-1			20.1	0	0
TDP002	MLDKLMNWPQ^rrgm	0-0-0-0-0-0-0-0-0-0-0-0-0-0-0-0-0-0-0-0-0-0-0-0-0-0-0-0-0-0-0-0-0-0-0-0-0-0-0-0-1-1-0-0-0-0-1-0-1-1-0-0			22.2	0	0
TDP002	mldk^LMNWPQR^rgm	0-0-0-0-0-0-0-0-0-0-0-0-0-0-0-0-0-0-0-0-0-0-0-0-0-0-0-0-0-0-0-0-0-0-0-0-0-0-0-0-0-0-1-0-0-0-1-1-0-0-0-0			21.9	0	0
TDP002	mld^KLMNWPQRR^gm	0-0-0-0-0-0-0-0-0-0-0-0-0-0-0-0-0-0-0-0-0-0-0-0-0-0-0-0-0-0-0-0-0-0-0-0-0-0-0-0-0-1-0-0-0-0-1-0-0-1-1-0			20.3	0	0
TDP002	mldk^LMNWPQRR^gm	0-0-0-0-0-0-0-0-0-0-0-0-0-0-0-0-0-0-0-0-0-0-0-0-0-0-0-0-0-0-0-0-0-0-0-0-0-0-0-0-0-0-0-0-0-0-1-0-0-0-0-0			17.7	0	0
TDP002	mldkl^MNWPQRRGM	0-0-0-0-1-0-0-0-0-0-0-0-0-0-0-0-0-0-0-0-0-0-0-0-0-0-0-0-0-0-0-0-0-0-0-0-0-0-0-0-1-0-0-0-1-1-1-0-1-1-0-0			24.5	0	0
TDP002	MLDKLMN^wpqrrgm	0-0-0-0-0-0-0-0-0-0-0-0-0-1-0-0-0-0-0-0-0-0-0-0-0-0-0-0-0-0-0-0-0-0-0-0-0-0-0-0-0-0-0-0-0-1-1-1-0-0-0-0			16.4	0	0
TDP002	mldk^LMNWPQRRGM	0-0-0-0-0-0-0-0-0-0-0-0-0-0-0-0-0-0-0-0-0-0-0-0-0-0-0-0-0-0-0-0-0-0-0-0-0-0-0-0-0-0-0-0-0-1-1-0-0-0-0-0			19.5	0	0
TDP003	XAVRAVEG	0-0-0-0-0-0-0-0-0-0-0-0-0-0-0-0-0-0-0-0-0-0-0-0-0-0-0-0-0-0-0-0-0-0-0-0-0-0-0-0-0-2-0-0-0-0-0-0-0-2-1-0			20.5	0	0
TDP003	IKMWQSMX	0-0-0-0-0-0-0-0-0-0-0-0-0-0-0-0-0-0-0-0-0-0-0-0-0-0-0-0-0-0-0-0-0-0-0-0-0-0-0-0-2-3-0-0-1-1-3-0-1-3-5-1			23	0	0																																										IKMWQSMX
TDP003	VEGIKMWQ	0-0-0-0-0-0-0-0-0-0-0-0-0-0-0-0-0-0-0-0-0-0-0-0-0-0-0-0-0-0-0-0-0-0-0-0-0-0-0-0-0-0-1-0-0-0-1-1-0-0-1-1			17.7	0	0
TDP003	EGIKMWQS	0-0-0-0-1-0-0-0-0-0-0-0-0-0-0-0-0-0-0-0-0-0-0-0-0-0-0-0-0-0-0-0-0-0-0-0-0-0-0-0-0-0-1-1-0-0-1-1-0-0-1-0			24.9	0	0						EGIKMWQS
TDP003	GIKMWQSM	0-1-1-1-2-0-0-0-0-0-0-0-0-1-0-0-0-1-0-0-0-0-0-0-0-0-0-0-0-0-0-0-0-0-0-0-0-0-0-0-0-0-0-0-0-0-0-0-0-0-0-0			25.3	0	0			GIKMWQSM	GIKMWQSM	GIKMWQSM	GIKMWQSM									GIKMWQSM				GIKMWQSM
TDP003	KMWQSMXX	0-0-0-1-0-0-1-0-0-2-0-1-2-1-0-0-0-0-0-0-0-0-0-0-0-0-0-0-0-0-0-0-0-0-0-0-0-0-0-0-0-0-0-0-0-1-1-0-0-0-0-0			22.2	0	0					KMWQSMXX			KMWQSMXX			KMWQSMXX		KMWQSMXX	KMWQSMXX	KMWQSMXX
TDP003	MWQSMXXX	0-0-0-0-0-0-0-0-0-0-0-0-0-0-0-0-0-0-0-0-0-0-0-0-0-0-0-0-0-0-0-0-0-0-0-0-0-0-0-1-0-0-0-0-0-0-0-0-0-0-0-0			16	0	0																																									MWQSMXXX
TDP003	XXAVRAVE	0-0-0-0-0-0-0-0-0-0-0-0-0-0-0-0-0-0-0-0-0-0-0-0-0-0-0-0-0-0-0-0-0-0-0-0-0-0-0-0-0-0-0-0-0-0-0-0-0-0-1-0			18.1	0	0
TDP003	AVRAVEGI	0-0-0-0-0-0-0-0-0-0-0-0-0-0-0-0-0-0-0-0-0-0-0-0-0-0-0-0-0-0-0-0-0-0-0-0-0-0-0-0-0-0-0-0-0-0-2-0-0-1-1-1			17.9	0	0
TDP003	XXXAVRAV	1-1-0-0-1-1-1-1-1-1-1-1-1-0-1-1-0-1-1-1-1-0-0-1-0-0-1-0-1-1-1-1-1-1-1-0-1-0-1-1-2-2-0-0-1-1-1-0-0-1-1-0	3 times in 3 NECs		23	20.7	0		XXXAVRAV	XXXAVRAV			XXXAVRAV	XXXAVRAV	XXXAVRAV	XXXAVRAV	XXXAVRAV	XXXAVRAV	XXXAVRAV	XXXAVRAV	XXXAVRAV		XXXAVRAV	XXXAVRAV		XXXAVRAV	XXXAVRAV	XXXAVRAV	XXXAVRAV			XXXAVRAV			XXXAVRAV		XXXAVRAV	XXXAVRAV	XXXAVRAV	XXXAVRAV	XXXAVRAV	XXXAVRAV	XXXAVRAV		XXXAVRAV		XXXAVRAV	XXXAVRAV	XXXAVRAV
--------
TDP003	a^VRAVEGIKMW^qsm	0-0-0-0-0-0-0-0-0-0-0-0-0-0-0-0-0-0-0-0-0-0-0-0-0-0-0-0-0-0-0-0-0-0-0-0-0-0-0-0-1-1-0-0-0-0-1-0-0-1-1-0			23	0	0
TDP003	a^VRAVEGIKMWQSM	1-1-0-0-0-1-1-1-1-0-1-1-0-0-1-1-0-1-1-1-1-0-0-1-0-0-1-0-1-1-1-1-1-1-1-0-1-0-1-1-1-1-0-0-1-1-0-0-0-0-0-0	3 times in 3 NECs		22.4	20.7	0
TDP003	AVRAVEGIKMWQ^sm	0-0-0-1-0-0-1-0-0-1-0-1-1-1-0-0-0-0-0-0-0-0-0-0-0-0-0-0-0-0-0-0-0-0-0-0-0-0-0-0-0-0-0-0-0-1-1-0-0-0-0-0			22.2	0	0
TDP003	AVRAVEGIKMWQSM	1-1-1-0-0-1-1-1-1-1-1-1-0-0-1-1-1-1-1-1-1-1-1-0-0-1-1-1-0-1-1-1-1-0-1-1-1-0-1-1-0-1-0-1-1-0-1-1-1-1-1-1	3 times in 3 NECs		24.7	24.5	0
TDP003	AVRAVEGIKMW^qsm	0-0-0-0-0-0-0-0-0-0-0-0-0-0-0-0-0-0-0-0-0-0-0-0-0-0-0-0-0-0-0-0-0-0-0-0-0-0-0-0-1-1-0-0-1-1-1-0-1-0-1-0			22.2	0	0
TDP003	AVRAVEGIKM^wqsm	0-1-1-1-1-0-0-0-0-0-0-0-0-1-0-0-0-1-0-0-0-0-0-0-0-0-0-0-0-0-0-0-0-0-0-0-0-0-0-0-0-0-0-0-0-0-0-0-0-0-0-0			25.3	0	0
TDP003	AVRAVEGIK^mwqsm	0-0-0-0-1-0-0-0-0-0-0-0-0-0-0-0-0-0-0-0-0-0-0-0-0-0-0-0-0-0-0-0-0-0-0-0-0-0-0-0-0-0-1-1-0-0-1-1-0-0-1-0			24.9	0	0
TDP003	a^VRAVEGIKMWQ^sm	0-0-0-0-0-0-0-0-0-1-0-0-1-0-0-0-0-0-0-0-0-0-0-0-0-0-0-0-0-0-0-0-0-0-0-0-0-0-0-0-0-0-0-0-0-0-0-0-0-0-0-0			20.2	0	0
TDP003	AVRAVEGIKMWQS^m	0-0-0-0-0-0-0-0-0-0-0-0-0-0-0-0-0-0-0-0-0-0-0-0-0-0-0-0-0-0-0-0-0-0-0-0-0-0-0-1-0-0-0-0-0-0-0-0-0-0-0-0			16	0	0
TDP003	avra^VEGIKMW^qsm	0-0-0-0-0-0-0-0-0-0-0-0-0-0-0-0-0-0-0-0-0-0-0-0-0-0-0-0-0-0-0-0-0-0-0-0-0-0-0-0-0-0-0-0-0-0-1-0-0-1-1-1			17.9	0	0
TDP003	avra^VEGIKMWQSM	0-0-0-0-0-0-0-0-0-0-0-0-0-0-0-0-0-0-0-0-0-0-0-0-0-0-0-0-0-0-0-0-0-0-0-0-0-0-0-0-0-0-0-0-0-0-1-0-0-0-0-0			16.5	0	0
TDP003	avr^AVEGIKMW^qsm	0-0-0-0-0-0-0-0-0-0-0-0-0-0-0-0-0-0-0-0-0-0-0-0-0-0-0-0-0-0-0-0-0-0-0-0-0-0-0-0-0-1-0-0-0-0-0-0-0-1-1-0			20.5	0	0
TDP003	avr^AVEGIKMWQSM	0-0-0-0-0-0-0-0-0-0-0-0-0-0-0-0-0-0-0-0-0-0-0-0-0-0-0-0-0-0-0-0-0-0-0-0-0-0-0-0-0-1-0-0-0-0-0-0-0-1-0-0			16.5	0	0
TDP003	AVRAVEGI^kmwqsm	0-0-0-0-0-0-0-0-0-0-0-0-0-0-0-0-0-0-0-0-0-0-0-0-0-0-0-0-0-0-0-0-0-0-0-0-0-0-0-0-0-0-1-0-0-0-1-1-0-0-1-1			17.7	0	0
TDP003	av^RAVEGIKMW^qsm	0-0-0-0-0-0-0-0-0-0-0-0-0-0-0-0-0-0-0-0-0-0-0-0-0-0-0-0-0-0-0-0-0-0-0-0-0-0-0-0-0-0-0-0-0-0-0-0-0-0-1-0			18.1	0	0
TDP003	a^VRAVEGIKM^wqsm	0-0-0-0-1-0-0-0-0-0-0-0-0-0-0-0-0-0-0-0-0-0-0-0-0-0-0-0-0-0-0-0-0-0-0-0-0-0-0-0-0-0-0-0-0-0-0-0-0-0-0-0			15.2	0	0
TDP004	QSTYFHDL	0-0-0-0-0-0-0-0-0-0-0-0-0-0-0-0-0-0-0-0-0-0-0-0-0-0-0-0-0-0-0-0-0-0-0-0-0-0-0-0-1-1-1-0-0-1-1-1-0-1-1-1			19.3	0	0																																										QSTYFHDL
TDP004	TYFHDLNP	0-0-0-1-0-0-0-0-0-0-0-0-0-0-0-0-0-0-0-0-0-0-0-0-0-0-0-0-0-0-0-0-0-0-0-0-0-0-0-0-1-1-1-0-1-1-1-1-1-1-1-1			24.5	0	0					TYFHDLNP																																					TYFHDLNP
TDP004	YFHDLNPY	0-0-0-0-0-0-0-0-0-0-0-0-0-0-0-0-0-0-0-0-0-0-0-0-0-0-0-0-0-0-0-0-0-0-0-0-0-0-0-0-0-1-1-0-1-1-1-2-1-1-1-0			21.5	0	0
TDP004	HDLNPYMX	0-0-0-0-1-0-0-0-0-0-0-0-0-0-0-0-0-0-0-0-0-0-0-0-0-0-0-0-0-0-0-0-0-0-0-0-0-0-0-0-0-0-0-0-0-0-0-0-0-0-0-0			16.1	0	0						HDLNPYMX
TDP004	STYFHDLN	0-0-0-0-1-0-0-0-0-0-0-0-0-0-0-0-0-0-0-0-0-0-0-0-0-0-0-0-0-0-0-0-0-0-0-0-0-0-0-0-0-0-0-0-0-0-0-0-0-0-0-0			15.4	0	0						STYFHDLN
TDP004	XXXGIQST	0-0-0-0-0-0-0-0-0-0-0-0-0-0-0-0-0-0-0-0-0-1-0-0-0-0-0-0-0-0-0-0-0-0-0-0-0-0-0-0-0-0-0-0-0-0-0-1-0-0-0-0			16.9	0	0																							XXXGIQST
TDP004	XXGIQSTY	0-0-0-0-0-0-0-0-0-0-0-0-0-0-0-0-0-0-0-0-0-0-0-0-0-0-0-0-0-0-0-0-0-0-0-0-0-0-0-0-0-1-0-0-0-0-1-0-0-0-1-0			21	0	0
TDP004	XGIQSTYF	0-0-0-0-0-0-0-0-0-0-0-0-0-0-0-0-0-0-0-0-0-1-0-0-0-0-0-0-0-1-0-1-0-0-2-0-0-0-0-1-1-1-1-0-0-1-1-1-1-1-1-0			19.8	0	0																							XGIQSTYF								XGIQSTYF		XGIQSTYF			XGIQSTYF					XGIQSTYF	XGIQSTYF
TDP004	LNPYMXXX	0-0-0-0-0-0-0-0-0-0-0-0-0-0-0-0-0-0-0-0-0-0-0-0-0-0-0-0-0-0-0-0-0-0-1-0-0-0-0-0-0-0-0-0-0-0-0-0-0-0-0-0			16.5	0	0																																				LNPYMXXX
TDP004	GIQSTYFH	0-0-0-0-0-0-0-0-0-0-0-0-0-0-0-0-0-0-0-0-0-0-0-0-0-0-0-0-0-0-0-0-0-0-0-0-0-0-0-0-1-1-1-0-1-1-1-1-1-1-1-0			18.3	0	0																																										GIQSTYFH
TDP004	IQSTYFHD	0-0-0-0-0-0-0-0-0-0-0-0-0-0-0-0-0-0-0-0-0-0-0-0-0-0-0-0-0-0-0-0-0-0-0-0-0-0-0-0-0-1-1-0-1-1-1-0-1-0-1-1			17.6	0	0
--------
TDP004	GIQSTYFH^dlnpym	0-0-0-1-0-0-0-0-0-0-0-0-0-0-0-0-0-0-0-0-0-0-0-0-0-0-0-0-0-0-0-0-0-0-0-0-0-0-0-0-1-1-1-0-1-1-1-1-1-1-1-1			24.5	0	0
TDP004	GIQSTYFHDLNPYM	1-1-1-1-1-1-1-1-1-1-1-1-1-1-1-1-1-1-1-1-1-1-1-1-1-1-1-1-1-1-1-1-1-1-1-1-1-1-1-1-1-1-0-0-1-1-1-0-1-1-1-0	3 times in 3 NECs		19.7	18.6	0
TDP004	giq^STYFHDLNPYM	0-0-0-0-0-0-0-0-0-0-0-0-0-0-0-0-0-0-0-0-0-1-0-0-0-0-0-0-0-1-0-1-0-0-1-0-0-0-0-1-1-1-1-0-0-1-1-1-1-1-1-0			19.8	0	0
TDP004	GIQSTYFHD^lnpym	0-0-0-0-0-0-0-0-0-0-0-0-0-0-0-0-0-0-0-0-0-0-0-0-0-0-0-0-0-0-0-0-0-0-0-0-0-0-0-0-0-1-1-0-1-1-1-1-1-1-1-0			21.5	0	0
TDP004	giqs^TYFHDLNPYM	0-0-0-0-0-0-0-0-0-0-0-0-0-0-0-0-0-0-0-0-0-0-0-0-0-0-0-0-0-0-0-0-0-0-0-0-0-0-0-0-1-1-1-0-1-1-1-1-1-1-1-0			18.3	0	0
TDP004	gi^QSTYFHDLNPYM	0-0-0-0-0-0-0-0-0-0-0-0-0-0-0-0-0-0-0-0-0-0-0-0-0-0-0-0-0-0-0-0-0-0-0-0-0-0-0-0-0-1-0-0-0-0-1-0-0-0-1-0			21	0	0
TDP004	GIQSTYFHDLN^pym	0-0-0-0-1-0-0-0-0-0-0-0-0-0-0-0-0-0-0-0-0-0-0-0-0-0-0-0-0-0-0-0-0-0-0-0-0-0-0-0-0-0-0-0-0-0-0-0-0-0-0-0			16.1	0	0
TDP004	giq^STYFHDLNPY^m	0-0-0-0-0-0-0-0-0-0-0-0-0-0-0-0-0-0-0-0-0-0-0-0-0-0-0-0-0-0-0-0-0-0-1-0-0-0-0-0-0-0-0-0-0-0-0-0-0-0-0-0			16.5	0	0
TDP004	giqsty^FHDLNPYM	0-0-0-0-0-0-0-0-0-0-0-0-0-0-0-0-0-0-0-0-0-0-0-0-0-0-0-0-0-0-0-0-0-0-0-0-0-0-0-0-1-1-1-0-0-1-1-1-0-1-1-1			19.3	0	0
TDP004	g^IQSTYFHDLNPYM	0-0-0-0-0-0-0-0-0-0-0-0-0-0-0-0-0-0-0-0-0-1-0-0-0-0-0-0-0-0-0-0-0-0-0-0-0-0-0-0-0-0-0-0-0-0-0-0-0-0-0-0			15.4	0	0
TDP004	giqst^YFHDLNPYM	0-0-0-0-0-0-0-0-0-0-0-0-0-0-0-0-0-0-0-0-0-0-0-0-0-0-0-0-0-0-0-0-0-0-0-0-0-0-0-0-0-1-1-0-1-1-1-0-1-0-1-1			17.6	0	0
TDP004	giqstyf^HDLNPYM	0-0-0-0-1-0-0-0-0-0-0-0-0-0-0-0-0-0-0-0-0-0-0-0-0-0-0-0-0-0-0-0-0-0-0-0-0-0-0-0-0-0-0-0-0-0-0-0-0-0-0-0			15.4	0	0
TDP004	g^IQSTYFHD^lnpym	0-0-0-0-0-0-0-0-0-0-0-0-0-0-0-0-0-0-0-0-0-0-0-0-0-0-0-0-0-0-0-0-0-0-0-0-0-0-0-0-0-0-0-0-0-0-0-1-0-0-0-0			16.9	0	0
TDP005	XXXSLNQA	0-0-0-0-0-1-0-0-0-0-0-0-0-0-0-0-0-0-0-1-0-0-0-0-0-0-0-0-0-0-0-1-0-0-0-1-0-0-0-0-0-0-0-0-0-0-0-0-0-1-0-0			16.9	0	0							XXXSLNQA														XXXSLNQA												XXXSLNQA				XXXSLNQA
TDP005	XXSLNQAY	0-0-0-0-0-0-0-0-0-0-0-0-0-0-0-0-0-0-0-0-0-0-0-0-0-0-0-0-0-0-0-0-0-0-0-0-0-0-0-0-0-0-0-0-0-0-0-0-0-0-1-1			16.3	0	0
TDP005	XSLNQAYG	0-0-0-0-0-0-0-0-0-0-0-0-0-0-0-0-0-0-0-0-0-0-0-0-0-0-0-0-0-0-0-0-0-0-0-0-0-0-0-0-0-0-0-1-0-0-0-0-0-0-0-1			19.7	0	0
TDP005	DMPSVDMX	0-0-0-0-1-0-0-0-0-0-0-0-0-0-0-0-0-0-0-0-0-0-0-0-0-0-0-0-0-0-0-0-0-0-0-0-0-0-0-0-0-0-0-0-0-0-0-0-0-0-0-0			15.2	0	0						DMPSVDMX
TDP005	PSVDMXXX	0-0-0-1-1-0-1-0-0-1-0-0-0-0-0-0-0-0-0-0-0-0-0-0-0-0-0-0-0-0-0-0-1-1-0-0-0-0-1-1-0-0-0-0-0-0-0-0-0-0-0-0	1 times in 3 NECs		25.4	15.9	0					PSVDMXXX	PSVDMXXX		PSVDMXXX			PSVDMXXX																							PSVDMXXX	PSVDMXXX					PSVDMXXX	PSVDMXXX
--------
TDP005	SLNQAYGDMPSVDM	1-1-1-1-1-1-1-1-1-1-1-1-1-1-1-1-1-1-1-1-1-1-1-1-1-1-1-1-1-1-1-1-1-1-1-1-1-1-1-1-1-1-1-1-1-1-1-1-1-1-1-1	3 times in 3 NECs		26.6	23	0
TDP005	SLNQAYGDMPSVD^m	0-0-0-1-1-0-1-0-0-1-0-0-0-0-0-0-0-0-0-0-0-0-0-0-0-0-0-0-0-0-0-0-1-1-0-0-0-0-1-1-0-0-0-0-0-0-0-0-0-0-0-0	1 times in 3 NECs		25.4	15.9	0
TDP005	sln^QAYGDMPSVDM	0-0-0-0-0-0-0-0-0-0-0-0-0-0-0-0-0-0-0-0-0-0-0-0-0-0-0-0-0-0-0-0-0-0-0-0-0-0-0-0-0-0-0-1-0-0-0-0-0-0-0-1			19.7	0	0
TDP005	s^LNQAYGDMPSVDM	0-0-0-0-0-1-0-0-0-0-0-0-0-0-0-0-0-0-0-1-0-0-0-0-0-0-0-0-0-0-0-1-0-0-0-1-0-0-0-0-0-0-0-0-0-0-0-0-0-1-0-0			16.9	0	0
TDP005	SLNQAYGDMPS^vdm	0-0-0-0-1-0-0-0-0-0-0-0-0-0-0-0-0-0-0-0-0-0-0-0-0-0-0-0-0-0-0-0-0-0-0-0-0-0-0-0-0-0-0-0-0-0-0-0-0-0-0-0			15.2	0	0
TDP005	sl^NQAYGDMPSVDM	0-0-0-0-0-0-0-0-0-0-0-0-0-0-0-0-0-0-0-0-0-0-0-0-0-0-0-0-0-0-0-0-0-0-0-0-0-0-0-0-0-0-0-0-0-0-0-0-0-0-1-1			16.3	0	0
TDP006	RTEHHAMX	0-0-1-0-0-0-0-0-0-0-0-0-0-0-0-0-0-0-0-1-0-0-0-0-0-0-0-0-0-0-0-1-1-0-0-0-0-0-0-0-1-1-0-0-0-0-0-0-0-0-0-0	1 times in 3 NECs		19.7	15.3	0				RTEHHAMX																	RTEHHAMX												RTEHHAMX	RTEHHAMX								RTEHHAMX
TDP006	TEHHAMXX	0-0-0-0-0-0-0-0-0-0-0-0-0-0-0-0-0-0-0-0-0-0-0-0-0-0-0-0-0-0-0-0-0-0-0-0-0-0-0-0-0-1-0-0-1-1-1-0-1-0-0-0			22.4	0	0
TDP006	FIVFILWR	0-1-2-1-0-0-0-0-0-0-0-0-0-0-0-0-0-0-0-0-0-0-0-0-0-0-0-0-0-0-0-0-0-0-0-0-0-0-0-0-0-0-0-0-0-0-0-0-0-0-0-0			19.7	0	0			FIVFILWR	FIVFILWR	FIVFILWR
TDP006	VFILWRTE	0-1-1-1-0-0-0-0-0-0-0-0-0-0-0-0-0-0-0-0-0-0-0-0-0-0-0-0-0-0-0-0-0-0-0-0-0-0-0-0-0-0-0-0-0-0-0-0-0-0-0-0			17.3	0	0			VFILWRTE	VFILWRTE	VFILWRTE
--------
TDP006	FIVFILWRTEHHAM	1-0-0-0-0-0-0-1-0-0-1-1-0-0-0-0-0-0-0-1-0-0-0-0-0-0-1-0-0-0-0-1-1-1-0-0-0-0-0-1-1-1-1-0-1-0-1-1-1-0-1-1	1 times in 3 NECs		30	27.2	0
TDP006	FIVFILWRTEH^ham	0-0-0-0-0-0-0-0-0-0-0-0-0-0-0-0-0-0-0-1-0-0-0-0-0-0-0-0-0-0-0-1-1-0-0-0-0-0-0-0-1-1-0-0-0-0-0-0-0-0-0-0	1 times in 3 NECs		19.2	15.3	0
TDP006	FIVFILWRTEHH^am	0-0-0-0-0-0-0-0-0-0-0-0-0-0-0-0-0-0-0-0-0-0-0-0-0-0-0-0-0-0-0-0-0-0-0-0-0-0-0-0-0-1-0-0-1-1-1-0-1-0-0-0			22.4	0	0
TDP006	fivf^ILWRTEHHAM	0-1-1-1-0-0-0-0-0-0-0-0-0-0-0-0-0-0-0-0-0-0-0-0-0-0-0-0-0-0-0-0-0-0-0-0-0-0-0-0-0-0-0-0-0-0-0-0-0-0-0-0			19.7	0	0
TDP006	fivf^ILWRTEH^ham	0-0-1-0-0-0-0-0-0-0-0-0-0-0-0-0-0-0-0-0-0-0-0-0-0-0-0-0-0-0-0-0-0-0-0-0-0-0-0-0-0-0-0-0-0-0-0-0-0-0-0-0			19.7	0	0
TDP006	fivfil^WRTEHHAM	0-1-1-1-0-0-0-0-0-0-0-0-0-0-0-0-0-0-0-0-0-0-0-0-0-0-0-0-0-0-0-0-0-0-0-0-0-0-0-0-0-0-0-0-0-0-0-0-0-0-0-0			17.3	0	0
TDP007	LPAEIMQT	0-0-0-0-0-0-0-0-0-0-0-0-0-0-0-0-0-0-0-0-0-0-0-0-0-0-0-0-0-0-0-0-0-0-0-0-0-0-0-0-0-0-0-0-0-0-1-1-0-0-0-1			17.2	0	0
TDP007	PAEIMQTT	0-0-0-1-1-0-0-0-0-0-0-0-0-0-0-0-0-0-0-0-0-0-0-0-0-0-0-0-0-0-0-0-0-0-0-0-0-0-0-0-0-0-1-1-0-0-0-1-0-0-1-0			16.2	0	0					PAEIMQTT	PAEIMQTT
TDP007	AEIMQTTQ	0-0-0-0-1-0-0-0-0-0-0-0-0-0-0-0-0-0-0-0-0-0-0-0-0-0-0-0-0-0-0-0-0-0-0-0-0-0-0-0-0-1-0-1-0-0-1-1-0-0-1-1			19.3	0	0						AEIMQTTQ
TDP007	EIMQTTQM	0-0-0-0-0-0-0-0-0-1-0-0-0-0-0-0-0-0-0-0-0-0-0-0-0-0-0-0-0-0-0-0-0-0-0-0-0-0-0-0-0-0-1-0-0-0-0-0-0-0-0-0			23.5	0	0											EIMQTTQM
TDP007	IMQTTQMX	0-0-0-1-1-0-0-0-0-0-0-0-0-0-0-0-0-0-0-0-0-0-0-0-0-0-0-0-0-0-0-0-0-0-0-0-0-0-0-0-0-0-0-0-0-0-1-0-0-0-0-0			22.8	0	0					IMQTTQMX	IMQTTQMX
TDP007	MQTTQMXX	0-0-0-1-1-0-0-0-1-1-0-0-0-1-0-0-0-0-0-0-0-0-0-0-0-0-0-0-0-0-0-0-0-0-0-0-0-0-0-0-1-1-1-0-1-1-2-1-1-1-1-1			26.9	0	0					MQTTQMXX	MQTTQMXX				MQTTQMXX	MQTTQMXX				MQTTQMXX																											MQTTQMXX
TDP007	QTTQMXXX	0-1-0-0-0-0-1-0-1-0-0-1-1-1-0-0-0-0-0-0-0-0-0-0-0-0-0-0-0-0-0-0-0-0-1-0-0-0-0-0-0-0-0-0-0-0-0-0-0-0-0-0			23.3	0	0			QTTQMXXX					QTTQMXXX		QTTQMXXX			QTTQMXXX	QTTQMXXX	QTTQMXXX																					QTTQMXXX
TDP007	XKVHLPAE	0-0-0-0-0-0-0-0-0-0-0-0-0-0-0-0-0-0-0-0-0-0-0-0-0-0-0-0-0-0-0-0-0-0-0-0-0-0-0-0-0-0-0-0-0-0-1-0-0-0-0-0			15.1	0	0
--------
TDP007	KVHLPAEIMQTTQM	1-1-1-1-1-1-1-1-1-1-1-1-1-1-1-1-1-1-1-1-1-1-1-1-1-1-1-1-1-1-1-1-1-1-1-1-1-1-1-1-1-1-0-1-1-1-1-1-1-1-1-1	3 times in 3 NECs		34.7	33.1	0
TDP007	KVHLPAEIMQTT^qm	0-0-0-1-1-0-0-0-1-1-0-0-0-1-0-0-0-0-0-0-0-0-0-0-0-0-0-0-0-0-0-0-0-0-0-0-0-0-0-0-1-1-1-0-1-1-1-1-1-1-1-1			26.9	0	0
TDP007	KVHLPAEIMQTTQ^m	0-1-0-0-0-0-1-0-1-0-0-1-1-1-0-0-0-0-0-0-0-0-0-0-0-0-0-0-0-0-0-0-0-0-1-0-0-0-0-0-0-0-0-0-0-0-0-0-0-0-0-0			23.3	0	0
TDP007	KVHLPAEIMQT^tqm	0-0-0-1-1-0-0-0-0-0-0-0-0-0-0-0-0-0-0-0-0-0-0-0-0-0-0-0-0-0-0-0-0-0-0-0-0-0-0-0-0-0-0-0-0-0-1-0-0-0-0-0			22.8	0	0
TDP007	KVHLPAEIM^qttqm	0-0-0-0-1-0-0-0-0-0-0-0-0-0-0-0-0-0-0-0-0-0-0-0-0-0-0-0-0-0-0-0-0-0-0-0-0-0-0-0-0-1-0-1-0-0-1-1-0-0-1-1			19.3	0	0
TDP007	KVHLPAEIMQ^ttqm	0-0-0-0-0-0-0-0-0-1-0-0-0-0-0-0-0-0-0-0-0-0-0-0-0-0-0-0-0-0-0-0-0-0-0-0-0-0-0-0-0-0-1-0-0-0-0-0-0-0-0-0			23.5	0	0
TDP007	KVHLPAE^imqttqm	0-0-0-0-0-0-0-0-0-0-0-0-0-0-0-0-0-0-0-0-0-0-0-0-0-0-0-0-0-0-0-0-0-0-0-0-0-0-0-0-0-0-0-0-0-0-1-1-0-0-0-1			17.2	0	0
TDP007	KVHLPAEI^mqttqm	0-0-0-1-1-0-0-0-0-0-0-0-0-0-0-0-0-0-0-0-0-0-0-0-0-0-0-0-0-0-0-0-0-0-0-0-0-0-0-0-0-0-1-1-0-0-0-1-0-0-1-0			16.2	0	0
TDP007	kvh^LPAEIMQTT^qm	0-0-0-0-0-0-0-0-0-0-0-0-0-0-0-0-0-0-0-0-0-0-0-0-0-0-0-0-0-0-0-0-0-0-0-0-0-0-0-0-0-0-0-0-0-0-1-0-0-0-0-0			15.1	0	0
TDP008	XELFDNRV	0-0-0-0-0-0-0-0-0-0-0-0-0-0-0-0-0-0-0-0-0-0-0-0-0-0-0-0-0-0-0-0-0-0-0-0-0-0-0-0-1-2-0-0-0-0-3-0-1-2-1-1			22.5	0	0																																										XELFDNRV
TDP008	VGKWSYRM	0-0-1-2-2-0-0-0-0-0-0-0-0-2-0-0-0-0-0-0-0-0-0-0-0-0-0-0-0-0-0-0-0-0-0-0-0-0-0-0-2-4-3-2-2-3-5-4-2-3-4-3			40.7	0	0				VGKWSYRM	VGKWSYRM	VGKWSYRM									VGKWSYRM																											VGKWSYRM
TDP008	WSYRMXXX	0-0-1-1-2-0-1-0-1-1-1-2-2-3-0-0-0-1-0-0-0-0-0-0-0-0-0-0-0-0-0-0-0-1-2-0-0-0-0-3-0-0-0-0-0-1-2-0-0-1-0-0			47	0	0				WSYRMXXX	WSYRMXXX	WSYRMXXX		WSYRMXXX		WSYRMXXX	WSYRMXXX	WSYRMXXX	WSYRMXXX	WSYRMXXX	WSYRMXXX				WSYRMXXX																WSYRMXXX	WSYRMXXX					WSYRMXXX
TDP008	FDNRVGKW	0-0-0-0-0-0-0-0-0-0-0-0-0-0-0-0-0-0-0-0-0-0-0-0-0-0-0-0-0-0-0-0-0-0-0-0-0-0-0-0-0-0-0-0-0-0-0-1-0-0-0-0			19.9	0	0
TDP008	NRVGKWSY	0-0-0-0-1-0-0-0-0-0-0-0-0-0-0-0-0-0-0-1-0-0-0-0-0-0-0-0-0-0-0-0-0-0-0-0-0-0-0-0-0-2-1-1-0-1-2-2-0-2-2-2			21.4	0	0						NRVGKWSY															NRVGKWSY
TDP008	RVGKWSYR	0-0-0-0-0-0-0-0-0-0-0-0-0-0-0-0-0-0-0-0-0-0-0-0-0-0-0-0-0-0-0-0-0-0-0-0-0-0-0-0-1-2-2-2-0-1-3-3-1-2-2-2			36.6	0	0																																										RVGKWSYR
TDP008	GKWSYRMX	0-0-0-0-0-0-0-0-0-0-0-0-0-1-0-0-0-0-0-0-0-0-0-0-0-0-0-0-0-0-0-0-0-0-0-0-0-0-0-0-1-2-2-0-1-2-2-0-1-1-0-0			26.1	0	0															GKWSYRMX																											GKWSYRMX
TDP008	KWSYRMXX	0-0-0-0-1-0-0-0-0-0-0-1-2-3-0-0-0-0-0-0-0-0-0-0-0-0-0-0-0-0-0-0-0-0-0-0-0-0-0-0-2-2-0-0-2-2-2-0-2-2-0-0			32.3	0	0						KWSYRMXX							KWSYRMXX	KWSYRMXX	KWSYRMXX																											KWSYRMXX
TDP008	XXELFDNR	0-0-0-0-0-0-0-1-0-0-1-0-0-0-0-0-0-0-0-0-0-0-0-0-0-0-0-1-0-0-0-1-0-1-1-0-0-0-0-2-0-0-0-0-1-1-1-1-0-0-0-0			19.4	0	0									XXELFDNR			XXELFDNR																	XXELFDNR				XXELFDNR		XXELFDNR	XXELFDNR					XXELFDNR
TDP008	XXXELFDN	0-0-0-0-0-0-0-0-0-0-0-0-0-0-0-0-0-0-0-0-1-0-0-0-0-0-0-0-0-0-0-0-0-0-0-0-0-0-0-0-0-1-1-0-0-1-2-2-0-1-1-0			24.8	0	0																						XXXELFDN
TDP008	ELFDNRVG	0-0-0-1-1-0-0-0-0-0-0-0-0-0-0-0-0-0-0-0-0-0-0-0-0-0-0-0-0-0-0-0-0-0-0-0-0-0-0-0-0-0-0-0-0-0-0-0-0-0-0-0			15.7	0	0					ELFDNRVG	ELFDNRVG
TDP008	LFDNRVGK	0-0-0-0-1-0-0-0-0-0-0-1-1-2-0-0-0-1-0-0-0-0-0-0-0-0-0-0-0-0-0-0-0-0-0-0-0-0-0-0-0-0-0-0-0-0-0-0-1-0-0-0			18.7	0	0						LFDNRVGK							LFDNRVGK	LFDNRVGK	LFDNRVGK				LFDNRVGK
--------
TDP008	ELFDNRVGKWSYR^m	0-0-1-1-1-0-1-0-1-1-1-2-2-2-0-0-0-1-0-0-0-0-0-0-0-0-0-0-0-0-0-0-0-1-1-0-0-0-0-2-0-0-0-0-0-1-1-0-0-0-0-0			47	0	0
TDP008	ELFDNRVGKWSYRM	2-2-2-2-2-2-2-2-2-2-2-2-2-2-2-2-2-2-2-2-2-2-1-1-1-1-2-1-1-2-2-2-2-2-2-1-2-1-2-2-2-2-0-0-2-1-1-0-2-2-1-0	5 times in 3 NECs		35.4	32.8	0
TDP008	ELFDNRVGKW^syrm	0-0-1-2-2-0-0-0-0-0-0-0-0-2-0-0-0-0-0-0-0-0-0-0-0-0-0-0-0-0-0-0-0-0-0-0-0-0-0-0-2-2-2-2-2-2-2-2-2-2-2-2			40.7	0	0
TDP008	ELFDNRVGK^wsyrm	0-0-0-0-0-0-0-0-0-0-0-0-0-0-0-0-0-0-0-0-0-0-0-0-0-0-0-0-0-0-0-0-0-0-0-0-0-0-0-0-1-2-2-2-0-1-2-2-1-2-2-2			36.6	0	0
TDP008	el^FDNRVGKWSYR^m	0-0-0-0-0-0-0-0-0-0-0-0-0-0-0-0-0-0-0-0-0-0-0-0-0-0-0-0-0-0-0-0-0-0-1-0-0-0-0-1-0-0-0-0-0-0-0-0-0-0-0-0			18.9	0	0
TDP008	ELFDNRVGKWS^yrm	0-0-0-0-0-0-0-0-0-0-0-0-0-1-0-0-0-0-0-0-0-0-0-0-0-0-0-0-0-0-0-0-0-0-0-0-0-0-0-0-1-2-2-0-1-2-2-0-1-1-0-0			26.1	0	0
TDP008	ELFDNRVGKWSY^rm	0-0-0-0-1-0-0-0-0-0-0-1-2-2-0-0-0-0-0-0-0-0-0-0-0-0-0-0-0-0-0-0-0-0-0-0-0-0-0-0-2-2-0-0-2-2-2-0-2-2-0-0			32.3	0	0
TDP008	elf^DNRVGKWSYR^m	0-0-0-0-0-0-0-0-0-0-0-0-0-0-0-0-0-0-0-0-0-0-0-0-0-0-0-0-0-0-0-0-0-0-0-0-0-0-0-0-0-0-0-0-0-0-1-0-0-1-0-0			22.5	0	0
TDP008	ELFDNRVG^kwsyrm	0-0-0-0-1-0-0-0-0-0-0-0-0-0-0-0-0-0-0-1-0-0-0-0-0-0-0-0-0-0-0-0-0-0-0-0-0-0-0-0-0-2-1-1-0-1-2-2-0-2-2-2			21.4	0	0
TDP008	elf^DNRVGKWSYRM	0-0-0-0-0-0-0-0-0-0-0-0-0-0-0-0-0-0-0-0-0-0-0-0-0-0-0-0-0-0-0-0-0-0-0-0-0-0-0-0-1-1-0-0-0-0-1-0-1-1-0-0			20.5	0	0
TDP008	el^FDNRVGKWSYRM	0-0-0-0-0-0-0-1-0-0-1-0-0-0-0-0-0-0-0-0-0-0-0-0-0-0-0-1-0-0-0-1-0-1-0-0-0-0-0-1-0-0-0-0-1-1-0-0-0-0-0-0			19.4	0	0
TDP008	elfdn^RVGKWSYR^m	0-0-0-0-1-0-0-0-0-0-0-0-0-1-0-0-0-0-0-0-0-0-0-0-0-0-0-0-0-0-0-0-0-0-0-0-0-0-0-0-0-0-0-0-0-0-0-0-0-0-0-0			17.4	0	0
TDP008	elfdn^RVGKWSYRM	0-0-0-0-0-0-0-0-0-0-0-1-1-0-0-0-0-1-0-0-0-0-0-0-0-0-0-0-0-0-0-0-0-0-0-0-0-0-0-0-0-0-0-0-0-0-0-0-1-0-0-0			17.1	0	0
TDP008	e^LFDNRVGKWSYRM	0-0-0-0-0-0-0-0-0-0-0-0-0-0-0-0-0-0-0-0-1-0-0-0-0-0-0-0-0-0-0-0-0-0-0-0-0-0-0-0-0-0-0-0-0-0-0-0-0-0-0-0			15.7	0	0
TDP008	e^LFDNRVGKW^syrm	0-0-0-0-0-0-0-0-0-0-0-0-0-0-0-0-0-0-0-0-0-0-0-0-0-0-0-0-0-0-0-0-0-0-0-0-0-0-0-0-0-1-1-0-0-1-1-1-0-1-1-0			24.8	0	0
TDP008	ELFDNR^vgkwsyrm	0-0-0-0-0-0-0-0-0-0-0-0-0-0-0-0-0-0-0-0-0-0-0-0-0-0-0-0-0-0-0-0-0-0-0-0-0-0-0-0-0-0-0-0-0-0-0-1-0-0-0-0			19.9	0	0
TDP008	e^LFDNRVGK^wsyrm	0-0-0-0-0-0-0-0-0-0-0-0-0-0-0-0-0-0-0-0-0-0-0-0-0-0-0-0-0-0-0-0-0-0-0-0-0-0-0-0-0-0-0-0-0-0-1-1-0-0-0-0			22.1	0	0
TDP008	elfd^NRVGKWSYRM	0-0-0-1-1-0-0-0-0-0-0-0-0-0-0-0-0-0-0-0-0-0-0-0-0-0-0-0-0-0-0-0-0-0-0-0-0-0-0-0-0-0-0-0-0-0-0-0-0-0-0-0			15.7	0	0
TDP008	el^FDNRVGKW^syrm	0-0-0-0-0-0-0-0-0-0-0-0-0-0-0-0-0-0-0-0-0-0-0-0-0-0-0-0-0-0-0-0-0-0-0-0-0-0-0-0-0-0-0-0-0-0-1-1-0-0-0-0			16.4	0	0
TDP008	elf^DNRVGKW^syrm	0-0-0-0-0-0-0-0-0-0-0-0-0-0-0-0-0-0-0-0-0-0-0-0-0-0-0-0-0-0-0-0-0-0-0-0-0-0-0-0-0-1-0-0-0-0-1-0-0-0-1-1			18.9	0	0
TDP008	elfdn^RVGKWSY^rm	0-0-0-0-0-0-0-0-0-0-0-0-0-1-0-0-0-0-0-0-0-0-0-0-0-0-0-0-0-0-0-0-0-0-0-0-0-0-0-0-0-0-0-0-0-0-0-0-0-0-0-0			18.7	0	0
TDP009	SEDWAFKP	0-1-1-1-1-0-1-0-1-1-0-0-1-0-0-1-1-1-0-0-0-0-0-0-0-0-0-0-0-0-0-1-1-1-1-1-1-1-1-1-1-1-1-2-0-1-1-1-1-1-1-2	3 times in 3 NECs		23	20.4	0			SEDWAFKP	SEDWAFKP	SEDWAFKP	SEDWAFKP		SEDWAFKP		SEDWAFKP	SEDWAFKP			SEDWAFKP			SEDWAFKP	SEDWAFKP	SEDWAFKP														SEDWAFKP	SEDWAFKP	SEDWAFKP	SEDWAFKP	SEDWAFKP	SEDWAFKP	SEDWAFKP	SEDWAFKP	SEDWAFKP	SEDWAFKP
TDP009	PTGPMXXX	0-0-1-2-1-0-1-0-0-1-0-0-1-1-0-0-1-1-0-0-0-0-0-0-0-0-0-0-0-0-0-0-0-0-0-0-0-0-0-0-0-0-1-2-0-1-1-1-0-0-1-3			27.8	0	0				PTGPMXXX	PTGPMXXX	PTGPMXXX		PTGPMXXX			PTGPMXXX			PTGPMXXX	PTGPMXXX			PTGPMXXX	PTGPMXXX
TDP009	NLSEDWAF	0-0-0-0-0-0-0-0-0-0-0-0-0-0-0-0-0-0-0-0-0-0-0-0-0-0-0-0-0-0-0-0-0-0-0-0-0-0-0-0-0-1-1-1-0-1-1-1-0-0-0-1			26.5	0	0
TDP009	XNLSEDWA	0-0-0-0-0-0-0-0-0-0-0-0-0-0-0-0-0-0-0-0-0-0-0-0-0-0-0-0-0-0-0-0-0-0-0-0-0-0-0-1-0-1-1-1-0-0-0-1-0-1-0-1			25.6	0	0																																									XNLSEDWA
TDP009	EDWAFKPT	0-0-0-0-0-0-0-0-0-0-0-0-0-0-0-0-0-0-0-0-0-0-0-0-0-0-0-0-0-0-0-0-0-0-0-0-0-0-0-1-0-0-1-1-0-0-0-1-0-0-0-0			18.6	0	0																																									EDWAFKPT
TDP009	XXXNLSED	0-1-0-0-0-0-0-1-0-0-1-1-0-1-0-1-1-0-1-1-1-1-0-0-0-0-0-0-1-0-0-0-0-0-1-1-0-1-1-0-1-0-1-1-1-1-1-0-1-0-0-0	3 times in 3 NECs		32	27	0			XXXNLSED						XXXNLSED			XXXNLSED	XXXNLSED		XXXNLSED		XXXNLSED	XXXNLSED		XXXNLSED	XXXNLSED	XXXNLSED	XXXNLSED							XXXNLSED						XXXNLSED	XXXNLSED		XXXNLSED	XXXNLSED		XXXNLSED
TDP009	AFKPTGPM	0-0-0-0-0-0-0-0-0-0-0-0-0-0-0-0-0-0-0-0-0-0-0-0-0-0-0-0-0-0-0-0-0-0-0-0-0-0-0-0-0-0-0-0-0-0-0-0-0-0-0-1			18.3	0	0
TDP009	FKPTGPMX	0-0-0-0-0-0-0-0-0-0-0-0-0-0-0-0-0-0-0-0-0-0-0-0-0-0-0-0-0-0-0-0-0-0-0-0-0-0-0-0-0-1-0-1-0-0-0-1-0-0-1-2			20.8	0	0
TDP009	XXNLSEDW	0-1-0-0-0-0-0-0-0-0-0-0-0-0-0-0-1-0-0-0-0-0-0-0-0-0-0-0-0-0-0-0-0-0-0-0-0-0-0-1-1-0-1-1-1-1-1-1-1-0-1-2			36.6	0	0			XXNLSEDW															XXNLSEDW																							XXNLSEDW	XXNLSEDW
TDP009	LSEDWAFK	1-1-1-2-2-1-1-1-0-1-1-1-1-1-1-0-1-1-1-1-1-1-1-1-0-0-1-1-1-1-1-0-0-0-1-1-1-1-0-1-1-1-1-0-1-1-1-2-1-1-1-2	3 times in 3 NECs		26.5	23.9	0		LSEDWAFK	LSEDWAFK	LSEDWAFK	LSEDWAFK	LSEDWAFK	LSEDWAFK	LSEDWAFK	LSEDWAFK		LSEDWAFK	LSEDWAFK	LSEDWAFK	LSEDWAFK	LSEDWAFK	LSEDWAFK		LSEDWAFK	LSEDWAFK	LSEDWAFK	LSEDWAFK	LSEDWAFK	LSEDWAFK	LSEDWAFK	LSEDWAFK			LSEDWAFK	LSEDWAFK	LSEDWAFK	LSEDWAFK	LSEDWAFK				LSEDWAFK	LSEDWAFK	LSEDWAFK	LSEDWAFK		LSEDWAFK	LSEDWAFK
--------
TDP009	NLSEDWAFKPTGPM	1-1-1-1-1-1-1-1-1-1-1-1-1-1-1-1-1-1-1-1-1-1-1-1-1-1-1-1-1-1-1-1-1-1-1-1-1-1-1-1-1-1-1-1-1-1-1-1-1-1-1-1	3 times in 3 NECs		36.8	34.8	0
TDP009	n^LSEDWAFKPTGPM	0-1-0-0-0-0-0-1-0-0-1-1-0-1-0-1-1-0-1-1-1-1-0-0-0-0-0-0-1-0-0-0-0-0-1-1-0-1-1-0-1-0-1-1-1-1-1-0-1-0-0-0	3 times in 3 NECs		32	27	0
TDP009	nl^SEDWAFKPTGPM	0-1-0-0-0-0-0-0-0-0-0-0-0-0-0-0-1-0-0-0-0-0-0-0-0-0-0-0-0-0-0-0-0-0-0-0-0-0-0-1-1-0-1-1-1-1-1-1-1-0-1-1			36.6	0	0
TDP009	NLSEDWAFKPTGP^m	0-0-1-1-0-0-1-0-0-1-0-0-1-1-0-0-1-1-0-0-0-0-0-0-0-0-0-0-0-0-0-0-0-0-0-0-0-0-0-0-0-0-1-1-0-1-1-0-0-0-1-1			27.8	0	0
TDP009	nls^EDWAFKPTGPM	0-0-0-0-0-0-0-0-0-0-0-0-0-0-0-0-0-0-0-0-0-0-0-0-0-0-0-0-0-0-0-0-0-0-0-0-0-0-0-1-0-1-1-1-0-0-0-1-0-1-0-1			25.6	0	0
TDP009	nlsedw^AFKPTGPM	0-1-1-1-1-0-1-0-1-1-0-0-1-0-0-1-1-1-0-0-0-0-0-0-0-0-0-0-0-0-0-1-1-1-1-1-1-1-1-1-1-1-1-1-0-1-1-1-1-1-1-1	3 times in 3 NECs		23	20.4	0
TDP009	nlse^DWAFKPTGPM	0-0-0-0-0-0-0-0-0-0-0-0-0-0-0-0-0-0-0-0-0-0-0-0-0-0-0-0-0-0-0-0-0-0-0-0-0-0-0-0-0-1-1-1-0-1-1-1-0-0-0-1			26.5	0	0
TDP009	nlsed^WAFKPTGPM	1-1-1-1-1-1-1-1-0-1-1-1-1-1-1-0-1-1-1-1-1-1-1-1-0-0-1-1-1-1-1-0-0-0-1-1-1-1-0-1-1-1-1-0-1-1-1-1-1-1-1-1	3 times in 3 NECs		26.5	23.9	0
TDP009	nlsedwa^FKPTGPM	0-0-0-0-0-0-0-0-0-0-0-0-0-0-0-0-0-0-0-0-0-0-0-0-0-0-0-0-0-0-0-0-0-0-0-0-0-0-0-1-0-0-1-1-0-0-0-1-0-0-0-0			18.6	0	0
TDP009	NLSEDWAFKPT^gpm	0-0-0-0-0-0-0-0-0-0-0-0-0-0-0-0-0-0-0-0-0-0-0-0-0-0-0-0-0-0-0-0-0-0-0-0-0-0-0-0-0-1-0-1-0-0-0-1-0-0-1-1			20.8	0	0
TDP009	nlsedw^AFKPTGP^m	0-0-0-0-0-0-0-0-0-0-0-0-0-0-0-0-0-0-0-0-0-0-0-0-0-0-0-0-0-0-0-0-0-0-0-0-0-0-0-0-0-0-0-1-0-0-0-0-0-0-0-1			19.2	0	0
TDP009	NLSEDWAFKP^tgpm	0-0-0-0-0-0-0-0-0-0-0-0-0-0-0-0-0-0-0-0-0-0-0-0-0-0-0-0-0-0-0-0-0-0-0-0-0-0-0-0-0-0-0-0-0-0-0-0-0-0-0-1			18.3	0	0
TDP009	nlsed^WAFKPTGP^m	0-0-0-1-1-0-0-0-0-0-0-0-0-0-0-0-0-0-0-0-0-0-0-0-0-0-0-0-0-0-0-0-0-0-0-0-0-0-0-0-0-0-0-0-0-0-0-1-0-0-0-1			21	0	0
TDP009	nl^SEDWAFKPT^gpm	0-0-0-0-0-0-0-0-0-0-0-0-0-0-0-0-0-0-0-0-0-0-0-0-0-0-0-0-0-0-0-0-0-0-0-0-0-0-0-0-0-0-0-0-0-0-0-0-0-0-0-1			18.4	0	0
TDP010	LQVHMRYI	0-0-1-1-1-0-0-0-0-0-0-0-1-1-0-0-0-1-0-0-0-0-0-0-0-0-0-0-0-0-0-0-0-0-0-0-0-0-0-0-1-1-1-0-0-1-1-0-0-1-1-0			24	0	0				LQVHMRYI	LQVHMRYI	LQVHMRYI								LQVHMRYI	LQVHMRYI				LQVHMRYI																							LQVHMRYI
TDP010	QVHMRYIN	0-0-0-1-1-0-0-0-0-0-0-0-0-0-0-0-0-0-0-0-0-0-0-0-0-0-0-0-0-0-0-0-0-0-0-0-0-0-0-0-1-1-0-0-1-1-1-0-0-1-1-0			21.6	0	0					QVHMRYIN	QVHMRYIN																																				QVHMRYIN
TDP010	VHMRYINV	0-0-0-0-0-0-0-0-0-0-0-0-0-0-0-0-0-0-0-0-0-0-0-0-0-0-0-0-0-0-0-0-0-0-0-0-0-0-0-0-1-1-0-0-1-1-1-0-1-1-1-0			31.2	0	0																																										VHMRYINV
TDP010	HMRYINVM	0-0-0-0-0-0-0-0-0-0-0-0-0-0-0-0-0-0-0-0-0-0-0-0-0-0-0-0-0-0-0-0-0-0-0-0-0-0-0-0-0-1-0-0-0-1-0-0-0-0-0-0			24.8	0	0
TDP010	MRYINVMX	0-0-0-0-0-0-0-0-0-0-0-0-0-0-0-0-0-0-0-0-0-0-0-0-0-0-0-0-0-0-0-0-0-0-0-0-0-0-0-0-0-0-0-0-0-0-1-0-0-2-1-0			23.5	0	0
TDP010	RYINVMXX	0-0-0-0-0-0-0-0-0-0-0-0-0-0-0-0-0-0-0-0-0-0-0-0-0-0-0-0-0-0-0-0-0-0-0-0-0-0-0-0-1-1-0-0-1-1-0-0-0-0-0-0			25.1	0	0																																										RYINVMXX
TDP010	XHIGLQVH	0-0-0-0-0-0-0-0-0-0-0-0-0-0-0-0-0-0-0-0-0-0-0-0-0-0-0-0-0-0-0-0-0-0-0-0-0-0-0-0-0-0-0-0-0-1-0-0-0-2-0-0			17.3	0	0
TDP010	HIGLQVHM	0-0-0-0-0-0-0-0-0-0-0-0-0-0-0-0-0-0-0-0-0-0-0-0-0-0-0-0-0-0-0-0-0-0-0-0-0-0-0-0-0-0-0-0-0-0-1-0-0-0-1-0			23.5	0	0
TDP010	IGLQVHMR	0-0-0-0-0-0-0-0-0-0-0-0-0-0-0-0-0-0-0-0-0-0-0-0-0-0-0-0-0-0-0-0-0-0-0-0-0-0-0-0-0-0-0-0-0-0-0-0-0-1-0-0			16	0	0
--------
TDP010	HIGLQVHMRYINVM	0-1-1-1-0-0-1-1-1-0-1-1-0-0-1-1-0-0-1-1-1-0-0-1-0-0-1-0-0-0-0-1-1-1-1-1-1-0-1-1-1-1-1-0-1-1-1-1-1-1-1-1	2 times in 3 NECs		29	28.6	0
TDP010	HIGLQVHMR^yinvm	0-0-0-0-0-0-0-0-0-0-0-0-0-0-0-0-0-0-0-0-0-0-0-0-0-0-0-0-0-0-0-0-0-0-0-0-0-0-0-0-1-1-0-0-1-1-1-0-1-1-1-0			31.2	0	0
TDP010	HIGLQVHMRYIN^vm	0-0-0-0-0-0-0-0-0-0-0-0-0-0-0-0-0-0-0-0-0-0-0-0-0-0-0-0-0-0-0-0-0-0-0-0-0-0-0-0-1-1-0-0-1-1-0-0-0-0-0-0			25.1	0	0
TDP010	HIGLQVH^mryinvm	0-0-1-1-1-0-0-0-0-0-0-0-1-1-0-0-0-1-0-0-0-0-0-0-0-0-0-0-0-0-0-0-0-0-0-0-0-0-0-0-1-1-1-0-0-1-1-0-0-1-1-0			24	0	0
TDP010	HIGLQVHMRY^invm	0-0-0-0-0-0-0-0-0-0-0-0-0-0-0-0-0-0-0-0-0-0-0-0-0-0-0-0-0-0-0-0-0-0-0-0-0-0-0-0-0-1-0-0-0-1-0-0-0-0-0-0			24.8	0	0
TDP010	HIGLQVHM^ryinvm	0-0-0-1-1-0-0-0-0-0-0-0-0-0-0-0-0-0-0-0-0-0-0-0-0-0-0-0-0-0-0-0-0-0-0-0-0-0-0-0-1-1-0-0-1-1-1-0-0-1-1-0			21.6	0	0
TDP010	HIGLQVHMRYI^nvm	0-0-0-0-0-0-0-0-0-0-0-0-0-0-0-0-0-0-0-0-0-0-0-0-0-0-0-0-0-0-0-0-0-0-0-0-0-0-0-0-0-0-0-0-0-0-0-0-0-1-0-0			21.6	0	0
TDP010	higl^QVHMRYI^nvm	0-0-0-0-0-0-0-0-0-0-0-0-0-0-0-0-0-0-0-0-0-0-0-0-0-0-0-0-0-0-0-0-0-0-0-0-0-0-0-0-0-0-0-0-0-0-1-0-0-0-1-0			23.5	0	0
TDP010	hig^LQVHMRYI^nvm	0-0-0-0-0-0-0-0-0-0-0-0-0-0-0-0-0-0-0-0-0-0-0-0-0-0-0-0-0-0-0-0-0-0-0-0-0-0-0-0-0-0-0-0-0-0-0-0-0-1-0-0			15.2	0	0
TDP010	hig^LQVHMRYINVM	0-0-0-0-0-0-0-0-0-0-0-0-0-0-0-0-0-0-0-0-0-0-0-0-0-0-0-0-0-0-0-0-0-0-0-0-0-0-0-0-0-0-0-0-0-1-0-0-0-1-0-0			17.3	0	0
TDP010	higlq^VHMRYINVM	0-0-0-0-0-0-0-0-0-0-0-0-0-0-0-0-0-0-0-0-0-0-0-0-0-0-0-0-0-0-0-0-0-0-0-0-0-0-0-0-0-0-0-0-0-0-0-0-0-1-0-0			16	0	0
TDP011	VIWTHNAG	0-0-0-0-0-0-0-0-0-0-0-0-0-0-0-0-0-0-0-0-0-0-0-0-0-0-0-0-0-0-0-0-0-0-0-0-0-0-0-0-1-1-0-0-0-0-0-0-1-1-0-0			17.9	0	0																																										VIWTHNAG
TDP011	IWTHNAGM	0-0-0-0-0-0-0-0-0-0-0-0-0-0-0-0-0-0-0-0-0-1-0-0-0-0-0-0-0-0-0-0-0-0-0-0-0-0-0-0-1-1-0-0-1-1-1-1-1-1-0-0			22.5	0	0																							IWTHNAGM																			IWTHNAGM
TDP011	WTHNAGMS	0-0-0-0-0-0-0-0-0-0-0-0-0-1-0-0-0-1-0-0-0-0-0-0-0-0-0-0-0-0-0-0-0-0-0-0-0-0-0-0-0-0-0-0-0-0-1-0-0-0-0-0			18.5	0	0															WTHNAGMS				WTHNAGMS
TDP011	THNAGMSF	0-0-0-0-0-0-0-0-0-0-0-0-0-0-0-0-0-0-0-0-0-0-0-0-0-0-0-0-0-0-0-0-0-0-0-0-0-0-0-0-1-1-0-0-1-1-1-1-1-1-0-0			22	0	0																																										THNAGMSF
TDP011	HNAGMSFM	0-0-0-1-1-0-0-0-0-0-0-0-1-1-0-0-0-0-0-0-0-0-0-0-0-0-0-0-0-0-0-0-0-0-0-0-0-0-0-0-0-0-0-0-0-1-1-1-0-0-0-0			20.3	0	0					HNAGMSFM	HNAGMSFM								HNAGMSFM	HNAGMSFM
TDP011	NAGMSFMM	0-0-0-0-0-0-0-0-0-0-0-0-0-1-0-0-0-0-0-0-0-0-0-0-0-0-0-0-0-0-0-0-0-0-0-0-0-0-0-0-0-1-0-0-0-1-1-0-0-1-0-0			26.4	0	0															NAGMSFMM
TDP011	AGMSFMMX	0-0-1-1-1-0-0-0-0-1-0-0-0-1-0-0-0-0-0-0-0-0-0-0-0-0-0-0-0-0-0-0-0-0-0-0-0-0-0-0-0-1-0-0-0-1-1-0-0-1-0-0			27.5	0	0				AGMSFMMX	AGMSFMMX	AGMSFMMX					AGMSFMMX				AGMSFMMX
TDP011	GMSFMMXX	1-1-1-1-2-1-1-1-1-1-0-1-1-1-0-0-0-0-0-0-0-0-0-0-0-0-0-0-0-0-0-0-0-0-0-0-0-0-0-0-2-3-1-1-1-2-2-1-1-3-3-1			31.5	0	0		GMSFMMXX	GMSFMMXX	GMSFMMXX	GMSFMMXX	GMSFMMXX	GMSFMMXX	GMSFMMXX	GMSFMMXX	GMSFMMXX	GMSFMMXX		GMSFMMXX	GMSFMMXX	GMSFMMXX																											GMSFMMXX
TDP011	MSFMMXXX	0-1-0-1-1-0-0-0-1-1-0-0-1-1-0-1-1-2-0-0-0-0-0-0-0-0-0-0-0-0-0-0-0-0-0-0-0-0-0-0-0-0-0-0-0-0-0-0-0-0-1-0			25	0	0			MSFMMXXX		MSFMMXXX	MSFMMXXX				MSFMMXXX	MSFMMXXX			MSFMMXXX	MSFMMXXX		MSFMMXXX	MSFMMXXX	MSFMMXXX
TDP011	PVIWTHNA	0-0-0-0-1-0-0-0-0-0-0-0-0-0-0-0-0-0-0-0-0-0-0-0-0-0-0-0-0-0-0-0-0-0-0-0-0-0-0-0-1-2-1-2-1-1-2-1-1-2-3-2			20.9	0	0						PVIWTHNA																																				PVIWTHNA
TDP011	XXXPVIWT	0-0-0-0-0-0-0-0-0-0-0-0-0-0-1-0-0-1-0-0-0-0-0-0-0-0-0-0-0-0-0-0-1-0-0-0-0-0-0-0-2-1-0-0-1-1-0-0-1-1-1-0	1 times in 3 NECs		19.2	18.4	0																XXXPVIWT			XXXPVIWT															XXXPVIWT								XXXPVIWT
--------
TDP011	PVIWTHNAGMSF^mm	1-1-1-1-1-1-1-1-1-1-0-1-1-1-0-0-0-0-0-0-0-0-0-0-0-0-0-0-0-0-0-0-0-0-0-0-0-0-0-0-1-1-0-0-1-1-1-0-1-1-1-0			31.5	0	0
TDP011	PVIWTHNAGMS^fmm	0-0-1-1-1-0-0-0-0-1-0-0-0-1-0-0-0-0-0-0-0-0-0-0-0-0-0-0-0-0-0-0-0-0-0-0-0-0-0-0-0-1-0-0-0-1-1-0-0-1-0-0			27.5	0	0
TDP011	PVIWTHNAGMSFM^m	0-1-0-1-1-0-0-0-1-1-0-0-1-1-0-1-1-1-0-0-0-0-0-0-0-0-0-0-0-0-0-0-0-0-0-0-0-0-0-0-0-0-0-0-0-0-0-0-0-0-0-0			25	0	0
TDP011	PVIWTHNAGMSFMM	1-1-1-1-0-1-1-1-0-0-1-1-1-1-1-1-0-1-1-0-1-1-1-1-1-1-1-1-1-1-1-1-1-1-1-1-1-1-1-1-1-1-0-1-1-1-1-0-1-1-1-1	3 times in 3 NECs		30	26	0
TDP011	PVIWTH^nagmsfmm	0-0-0-0-0-0-0-0-0-0-0-0-0-0-0-0-0-0-0-0-0-1-0-0-0-0-0-0-0-0-0-0-0-0-0-0-0-0-0-0-1-1-0-0-1-1-1-1-1-1-0-0			22.5	0	0
TDP011	pviwt^HNAGMSFMM	0-0-0-0-0-0-0-0-0-0-0-0-0-0-0-0-0-0-0-0-0-0-0-0-0-0-0-0-0-0-0-0-0-0-0-0-0-0-0-0-1-1-0-0-0-0-0-0-1-1-0-0			17.9	0	0
TDP011	PVIWTHNAG^msfmm	0-0-0-1-1-0-0-0-0-0-0-0-1-1-0-0-0-0-0-0-0-0-0-0-0-0-0-0-0-0-0-0-0-0-0-0-0-0-0-0-0-0-0-0-0-1-1-1-0-0-0-0			20.3	0	0
TDP011	pviw^THNAGMSFMM	0-0-0-0-0-0-0-0-0-0-0-0-0-0-0-0-0-0-0-0-0-0-0-0-0-0-0-0-0-0-0-0-0-0-0-0-0-0-0-0-1-1-0-1-1-1-1-0-1-1-1-1			18.2	0	0
TDP011	PVIWTHNA^gmsfmm	0-0-0-0-0-0-0-0-0-0-0-0-0-0-0-0-0-0-0-0-0-0-0-0-0-0-0-0-0-0-0-0-0-0-0-0-0-0-0-0-1-1-0-0-1-1-1-1-1-1-0-0			22	0	0
TDP011	PVIWTHNAGM^sfmm	0-0-0-0-0-0-0-0-0-0-0-0-0-1-0-0-0-0-0-0-0-0-0-0-0-0-0-0-0-0-0-0-0-0-0-0-0-0-0-0-0-1-0-0-0-1-1-0-0-1-0-0			26.4	0	0
TDP011	pviw^THNAGMSF^mm	0-0-0-0-1-0-0-0-0-0-0-0-0-0-0-0-0-0-0-0-0-0-0-0-0-0-0-0-0-0-0-0-0-0-0-0-0-0-0-0-0-1-1-1-0-0-1-1-0-1-1-1			20.9	0	0
TDP011	p^VIWTHNAGMSFMM	0-0-0-0-0-0-0-0-0-0-0-0-0-0-1-0-0-0-0-0-0-0-0-0-0-0-0-0-0-0-0-0-1-0-0-0-0-0-0-0-1-0-0-0-1-0-0-0-1-0-0-0	1 times in 3 NECs		19.2	18.4	0
TDP011	PVIWTHN^agmsfmm	0-0-0-0-0-0-0-0-0-0-0-0-0-1-0-0-0-1-0-0-0-0-0-0-0-0-0-0-0-0-0-0-0-0-0-0-0-0-0-0-0-0-0-0-0-0-1-0-0-0-0-0			18.5	0	0
TDP011	p^VIWTHNAGMSFM^m	0-0-0-0-0-0-0-0-0-0-0-0-0-0-0-0-0-1-0-0-0-0-0-0-0-0-0-0-0-0-0-0-0-0-0-0-0-0-0-0-0-0-0-0-0-0-0-0-0-0-0-0			17.9	0	0
TDP011	p^VIWTHNAGMSF^mm	0-0-0-0-0-0-0-0-0-0-0-0-0-0-0-0-0-0-0-0-0-0-0-0-0-0-0-0-0-0-0-0-0-0-0-0-0-0-0-0-1-1-0-0-0-1-0-0-0-1-1-0			18.1	0	0
TDP011	pviw^THNAGMSFM^m	0-0-0-0-0-0-0-0-0-0-0-0-0-0-0-0-0-0-0-0-0-0-0-0-0-0-0-0-0-0-0-0-0-0-0-0-0-0-0-0-0-0-0-0-0-0-0-0-0-0-1-0			15.7	0	0
TDP012	MFLREKQY	0-0-0-0-0-0-0-0-0-0-0-0-0-0-0-0-0-0-0-0-0-1-0-0-0-0-0-0-0-0-0-0-0-0-1-0-0-0-0-1-1-2-2-0-1-1-2-1-1-2-2-0			19.9	0	0																							MFLREKQY													MFLREKQY					MFLREKQY	MFLREKQY
TDP012	XXVMFLRE	0-0-0-0-0-0-0-0-0-0-0-0-0-0-0-0-0-0-0-0-0-0-0-0-0-0-0-0-0-0-0-0-0-0-0-0-0-0-0-1-1-1-1-0-0-0-2-1-1-2-1-0			27.3	0	0																																									XXVMFLRE	XXVMFLRE
TDP012	YDPVSLXX	0-0-0-0-0-0-0-0-0-0-0-0-0-0-0-0-0-0-0-0-0-0-0-0-0-0-0-0-0-0-0-0-0-0-0-0-0-0-0-0-1-3-3-2-0-0-4-3-1-3-3-2			27.3	0	0																																										YDPVSLXX
TDP012	FLREKQYD	0-0-0-1-1-0-0-0-0-0-0-0-0-0-0-0-0-0-0-0-0-0-0-0-0-0-0-0-0-0-0-0-0-0-0-0-0-0-0-0-0-1-1-0-0-0-1-0-0-1-0-0			18.4	0	0					FLREKQYD	FLREKQYD
TDP012	XXXVMFLR	0-0-0-0-0-0-0-0-0-0-1-1-0-0-0-0-0-0-0-0-0-0-0-0-0-0-0-0-0-0-0-0-0-0-0-0-0-0-0-1-0-1-0-0-1-1-1-0-0-0-0-0			24.3	0	0												XXXVMFLR	XXXVMFLR																												XXXVMFLR
TDP012	XVMFLREK	1-1-1-1-1-0-0-0-0-0-0-0-1-0-0-0-1-0-0-0-0-0-0-0-0-0-0-0-0-0-0-0-0-0-0-0-0-0-0-0-2-1-2-1-0-1-2-1-1-2-2-1			29.3	0	0		XVMFLREK	XVMFLREK	XVMFLREK	XVMFLREK	XVMFLREK								XVMFLREK				XVMFLREK																								XVMFLREK
TDP012	VMFLREKQ	1-1-1-1-1-0-0-0-0-0-0-0-0-0-0-0-0-0-0-0-0-0-0-0-0-0-0-0-0-0-0-0-0-0-0-0-0-0-0-0-1-2-2-1-1-1-2-2-1-1-2-2			30.9	0	0		VMFLREKQ	VMFLREKQ	VMFLREKQ	VMFLREKQ	VMFLREKQ																																				VMFLREKQ
TDP012	LREKQYDP	0-0-0-0-0-0-0-0-0-0-0-0-0-0-0-0-0-0-0-0-0-0-0-0-0-0-0-0-0-0-0-0-0-0-0-0-0-0-0-0-1-1-0-0-0-1-1-0-0-0-0-0			19.9	0	0																																										LREKQYDP
TDP012	REKQYDPV	0-0-0-0-0-0-0-0-0-0-0-0-0-0-0-0-0-0-0-0-0-0-0-0-0-0-0-0-0-0-0-0-0-0-0-0-0-0-0-0-1-1-0-0-0-1-1-1-1-1-0-0			21.5	0	0																																										REKQYDPV
TDP012	EKQYDPVS	0-0-0-0-0-0-0-0-0-0-0-0-0-0-0-0-0-0-0-0-0-0-0-0-0-0-0-0-0-0-0-0-0-0-0-0-0-0-0-0-1-1-0-0-1-1-1-0-0-0-0-0			26.5	0	0																																										EKQYDPVS
TDP012	KQYDPVSL	1-1-1-1-0-1-1-1-0-1-1-1-1-1-1-1-1-1-1-1-1-1-1-0-1-1-1-0-1-1-1-1-1-1-1-1-1-1-1-1-1-1-0-0-1-1-1-0-1-1-0-0	3 times in 3 NECs		30.1	21.2	0		KQYDPVSL	KQYDPVSL	KQYDPVSL	KQYDPVSL		KQYDPVSL	KQYDPVSL	KQYDPVSL		KQYDPVSL	KQYDPVSL	KQYDPVSL	KQYDPVSL	KQYDPVSL	KQYDPVSL	KQYDPVSL	KQYDPVSL	KQYDPVSL	KQYDPVSL	KQYDPVSL	KQYDPVSL	KQYDPVSL	KQYDPVSL		KQYDPVSL	KQYDPVSL	KQYDPVSL		KQYDPVSL	KQYDPVSL	KQYDPVSL	KQYDPVSL	KQYDPVSL	KQYDPVSL	KQYDPVSL	KQYDPVSL	KQYDPVSL	KQYDPVSL	KQYDPVSL	KQYDPVSL	KQYDPVSL
TDP012	QYDPVSLX	0-0-0-0-0-0-0-0-0-0-0-0-0-0-0-0-0-0-0-0-0-0-0-0-0-0-0-0-0-0-0-0-0-0-0-0-0-0-0-0-0-0-0-0-0-0-1-0-0-1-0-0			22.8	0	0
TDP012	DPVSLXXX	0-0-0-0-0-0-0-0-0-0-0-0-1-1-0-0-0-0-0-0-0-0-0-0-0-0-0-0-0-0-0-0-0-0-1-0-0-0-1-1-0-0-0-0-0-0-1-0-0-0-0-0			27.8	0	0														DPVSLXXX	DPVSLXXX																					DPVSLXXX				DPVSLXXX	DPVSLXXX
--------
TDP012	VMFLREKQYDPVSL	1-1-1-1-1-1-1-1-1-1-1-1-1-1-1-1-1-1-1-1-1-1-1-1-1-1-1-1-1-1-1-1-1-1-1-1-1-1-1-1-1-1-0-0-1-1-1-0-1-1-0-0	3 times in 3 NECs		32.3	30.3	0
TDP012	VMFLREKQYD^pvsl	1-1-1-1-0-1-1-1-0-1-1-1-1-1-1-1-1-1-1-1-1-1-1-0-1-1-1-0-1-1-1-1-1-1-1-1-1-1-1-1-1-1-0-0-1-1-1-0-1-1-0-0	3 times in 3 NECs		30.1	21.2	0
TDP012	vmflr^EKQYDPVSL	0-0-0-0-0-0-0-0-0-0-0-0-0-0-0-0-0-0-0-0-0-0-0-0-0-0-0-0-0-0-0-0-0-0-0-0-0-0-0-0-0-1-1-0-0-0-1-0-0-1-1-0			19.9	0	0
TDP012	VMFLREKQYDPVS^l	0-0-0-0-0-0-0-0-0-0-0-0-1-1-0-0-0-0-0-0-0-0-0-0-0-0-0-0-0-0-0-0-0-0-1-0-0-0-1-1-0-0-0-0-0-0-1-0-0-0-0-0			27.8	0	0
TDP012	VMFLREKQYDPV^sl	0-0-0-0-0-0-0-0-0-0-0-0-0-0-0-0-0-0-0-0-0-0-0-0-0-0-0-0-0-0-0-0-0-0-0-0-0-0-0-0-0-1-0-0-0-0-1-0-1-1-0-0			21.7	0	0
TDP012	v^MFLREKQYDPVSL	0-0-0-0-0-0-0-0-0-0-1-1-0-0-0-0-0-0-0-0-0-0-0-0-0-0-0-0-0-0-0-0-0-0-0-0-0-0-0-1-0-1-0-0-1-1-1-0-0-0-0-0			24.3	0	0
TDP012	vm^FLREKQYDPVSL	0-0-0-0-0-0-0-0-0-0-0-0-0-0-0-0-0-0-0-0-0-0-0-0-0-0-0-0-0-0-0-0-0-0-0-0-0-0-0-1-1-0-0-0-0-0-1-0-1-1-0-0			25.3	0	0
TDP012	vmfl^REKQYDPVSL	1-1-1-1-1-0-0-0-0-0-0-0-0-0-0-0-0-0-0-0-0-0-0-0-0-0-0-0-0-0-0-0-0-0-0-0-0-0-0-0-1-1-1-0-1-1-1-1-1-1-1-1			30.9	0	0
TDP012	vmf^LREKQYDPV^sl	0-0-0-0-0-0-0-0-0-0-0-0-0-0-0-0-0-0-0-0-0-0-0-0-0-0-0-0-0-0-0-0-0-0-0-0-0-0-0-0-1-0-1-1-0-0-1-1-0-1-1-1			25	0	0
TDP012	vmf^LREKQYDPVSL	1-1-1-1-1-0-0-0-0-0-0-0-1-0-0-0-1-0-0-0-0-0-0-0-0-0-0-0-0-0-0-0-0-0-0-0-0-0-0-0-1-1-1-0-0-1-1-0-1-1-1-0			29.3	0	0
TDP012	vm^FLREKQYDPV^sl	0-0-0-0-0-0-0-0-0-0-0-0-0-0-0-0-0-0-0-0-0-0-0-0-0-0-0-0-0-0-0-0-0-0-0-0-0-0-0-0-0-1-1-0-0-0-1-1-0-1-1-0			27.3	0	0
TDP012	VMFLREKQ^ydpvsl	0-0-0-0-0-0-0-0-0-0-0-0-0-0-0-0-0-0-0-0-0-0-0-0-0-0-0-0-0-0-0-0-0-0-0-0-0-0-0-0-1-1-0-0-0-1-1-1-1-1-0-0			21.5	0	0
TDP012	VMFLREKQY^dpvsl	0-0-0-0-0-0-0-0-0-0-0-0-0-0-0-0-0-0-0-0-0-0-0-0-0-0-0-0-0-0-0-0-0-0-0-0-0-0-0-0-1-1-0-0-1-1-1-0-0-0-0-0			26.5	0	0
TDP012	VMFLREK^qydpvsl	0-0-0-0-0-0-0-0-0-0-0-0-0-0-0-0-0-0-0-0-0-0-0-0-0-0-0-0-0-0-0-0-0-0-0-0-0-0-0-0-1-1-0-0-0-1-1-0-0-0-0-0			19.9	0	0
TDP012	VMFLREKQYDP^vsl	0-0-0-0-0-0-0-0-0-0-0-0-0-0-0-0-0-0-0-0-0-0-0-0-0-0-0-0-0-0-0-0-0-0-0-0-0-0-0-0-0-0-0-0-0-0-1-0-0-1-0-0			22.8	0	0
TDP012	vmflre^KQYDPVSL	0-0-0-1-1-0-0-0-0-0-0-0-0-0-0-0-0-0-0-0-0-0-0-0-0-0-0-0-0-0-0-0-0-0-0-0-0-0-0-0-0-1-1-0-0-0-1-0-0-1-0-0			18.4	0	0
TDP012	vmfl^REKQYDPV^sl	0-0-0-0-0-0-0-0-0-0-0-0-0-0-0-0-0-0-0-0-0-0-0-0-0-0-0-0-0-0-0-0-0-0-0-0-0-0-0-0-0-1-1-1-0-0-1-1-0-0-1-1			23.1	0	0
TDP012	VMFLR^ekqydpvsl	0-0-0-0-0-0-0-0-0-0-0-0-0-0-0-0-0-0-0-0-0-1-0-0-0-0-0-0-0-0-0-0-0-0-1-0-0-0-0-1-1-1-1-0-1-1-1-1-1-1-1-0			16.2	0	0
TDP013	YYKRFMAH	0-0-0-0-0-0-0-0-0-0-0-0-0-0-0-0-0-0-0-0-0-0-0-0-0-0-0-0-0-0-0-0-0-0-0-0-0-0-0-0-1-1-0-0-1-1-2-0-0-1-0-0			26.3	0	0																																										YYKRFMAH
TDP013	YKRFMAHW	1-1-1-1-1-0-0-0-0-0-1-1-1-1-1-1-1-1-0-0-0-0-0-0-0-0-0-0-0-0-0-0-0-0-0-0-0-0-0-0-1-1-0-0-1-1-1-0-1-1-1-0			22.7	0	0		YKRFMAHW	YKRFMAHW	YKRFMAHW	YKRFMAHW	YKRFMAHW						YKRFMAHW	YKRFMAHW	YKRFMAHW	YKRFMAHW	YKRFMAHW	YKRFMAHW	YKRFMAHW	YKRFMAHW																							YKRFMAHW
TDP013	KRFMAHWV	0-0-0-0-0-0-0-0-0-0-0-0-0-0-0-0-0-0-0-0-0-0-0-0-0-0-0-0-0-0-0-0-0-0-0-0-0-0-0-0-2-1-0-0-2-1-0-0-1-1-0-0			23.6	0	0																																										KRFMAHWV
TDP013	RFMAHWVG	0-0-0-0-0-0-0-0-0-0-0-0-0-0-0-0-0-0-0-0-1-1-0-0-0-0-0-0-1-1-0-0-0-0-0-0-0-0-0-0-1-0-0-0-1-1-0-0-1-0-0-0			18	0	0																						RFMAHWVG	RFMAHWVG							RFMAHWVG	RFMAHWVG											RFMAHWVG
TDP013	FMAHWVGI	0-0-0-0-0-0-0-0-0-0-0-1-1-1-0-0-0-0-0-0-0-1-0-0-0-0-0-0-0-0-0-0-0-0-1-0-0-0-0-1-0-0-0-0-1-0-0-0-1-0-0-0			30.7	0	0													FMAHWVGI	FMAHWVGI	FMAHWVGI								FMAHWVGI													FMAHWVGI					FMAHWVGI
TDP013	GMYYKRFM	0-0-0-0-0-0-0-0-0-0-0-0-0-0-0-0-0-0-0-1-0-0-0-0-0-0-0-0-0-1-0-0-0-0-0-0-0-0-0-0-0-0-0-0-0-0-0-0-0-0-0-0			17.1	0	0																					GMYYKRFM										GMYYKRFM
TDP013	XXXGMYYK	0-0-0-0-0-0-0-0-0-0-0-0-0-0-0-0-0-0-0-0-0-0-0-0-0-0-0-0-0-0-0-0-0-0-0-0-0-0-0-0-1-0-0-0-1-0-0-0-0-0-0-0			16.8	0	0																																										XXXGMYYK
TDP013	MYYKRFMA	0-0-0-0-0-0-0-0-0-0-0-0-0-0-0-0-0-0-0-0-0-1-0-0-0-0-0-0-0-0-0-0-0-0-0-0-0-0-0-0-1-0-0-0-1-0-0-0-1-0-0-0			26	0	0																							MYYKRFMA																			MYYKRFMA
--------
TDP013	GMYYKRFMAH^wvgi	0-0-0-0-0-0-0-0-0-0-0-1-1-1-0-0-0-0-0-0-0-1-0-0-0-0-0-0-0-0-0-0-0-0-1-0-0-0-0-1-0-0-0-0-1-0-0-0-1-0-0-0			30.7	0	0
TDP013	gmyyk^RFMAHWVGI	0-0-0-0-0-0-0-0-0-0-0-0-0-0-0-0-0-0-0-0-0-1-0-0-0-0-0-0-0-0-0-0-0-0-0-0-0-0-0-0-1-0-0-0-1-0-0-0-1-0-0-0			26	0	0
TDP013	GMYYKRFMA^hwvgi	0-0-0-0-0-0-0-0-0-0-0-0-0-0-0-0-0-0-0-0-1-1-0-0-0-0-0-0-1-1-0-0-0-0-0-0-0-0-0-0-1-0-0-0-1-1-0-0-1-0-0-0			18	0	0
TDP013	GMYYKRF^mahwvgi	1-1-1-1-1-0-0-0-0-0-1-1-1-1-1-1-1-1-0-0-0-0-0-0-0-0-0-0-0-0-0-0-0-0-0-0-0-0-0-0-1-1-0-0-1-1-1-0-1-1-1-0			22.7	0	0
TDP013	GMYYKRFMAHWVGI	1-0-1-0-0-1-0-0-1-1-0-0-0-0-0-1-0-0-1-1-1-0-0-1-0-0-1-1-1-0-0-0-0-1-1-0-1-0-1-0-0-0-0-0-1-1-0-0-0-0-0-0	3 times in 3 NECs		17.7	19.2	0
TDP013	gmyy^KRFMAHWVGI	0-0-0-0-0-0-0-0-0-0-0-0-0-0-0-0-0-0-0-1-0-0-0-0-0-0-0-0-0-1-0-0-0-0-0-0-0-0-0-0-0-0-0-0-0-0-0-0-0-0-0-0			17.1	0	0
TDP013	GMYYKRFM^ahwvgi	0-0-0-0-0-0-0-0-0-0-0-0-0-0-0-0-0-0-0-0-0-0-0-0-0-0-0-0-0-0-0-0-0-0-0-0-0-0-0-0-1-1-0-0-1-1-0-0-1-1-0-0			23.6	0	0
TDP013	GMYYKR^fmahwvgi	0-0-0-0-0-0-0-0-0-0-0-0-0-0-0-0-0-0-0-0-0-0-0-0-0-0-0-0-0-0-0-0-0-0-0-0-0-0-0-0-1-1-0-0-0-0-1-0-0-1-0-0			26.3	0	0
TDP013	gmyykr^FMAHWVGI	0-0-0-0-0-0-0-0-0-0-0-0-0-0-0-0-0-0-0-0-0-0-0-0-0-0-0-0-0-0-0-0-0-0-0-0-0-0-0-0-0-0-0-0-1-1-1-0-0-0-0-0			17.1	0	0
TDP013	g^MYYKRFM^ahwvgi	0-0-0-0-0-0-0-0-0-0-0-0-0-0-0-0-0-0-0-0-0-0-0-0-0-0-0-0-0-0-0-0-0-0-0-0-0-0-0-0-1-0-0-0-1-0-0-0-0-0-0-0			16.8	0	0
TDP014	MVDQELSG	0-0-0-0-0-0-0-0-0-0-0-0-0-0-0-0-0-0-0-0-0-0-0-0-0-0-0-0-0-0-0-0-0-0-0-0-0-0-0-0-0-0-0-1-0-0-0-1-0-0-0-0			17.1	0	0
TDP014	NTIKVXXX	0-0-0-0-1-0-0-0-0-1-0-0-0-0-0-0-0-0-0-0-0-0-0-0-0-0-0-0-0-0-0-0-0-0-1-0-0-0-0-1-0-0-0-1-0-0-0-0-0-0-0-1			38.4	0	0						NTIKVXXX					NTIKVXXX																									NTIKVXXX					NTIKVXXX
TDP014	VDQELSGN	0-0-0-0-0-0-0-0-0-0-0-0-0-0-0-0-0-0-0-0-0-0-0-0-0-0-0-0-0-0-0-0-0-0-0-0-0-0-0-0-0-0-1-0-0-0-1-1-0-0-1-1			19.1	0	0
TDP014	XXXMMVDQ	0-0-0-0-1-0-0-0-0-0-0-0-0-0-0-0-0-0-0-0-0-0-0-0-0-0-0-0-0-0-0-0-0-0-0-0-0-0-0-0-0-0-1-1-0-0-1-1-0-0-1-1			33	0	0						XXXMMVDQ
TDP014	MMVDQELS	0-0-0-0-0-0-0-0-0-0-0-0-0-0-0-0-0-0-0-0-0-0-0-0-0-0-0-0-0-0-0-0-0-0-0-0-0-0-0-0-0-1-1-0-0-0-1-1-0-0-1-1			18.3	0	0
TDP014	XXMMVDQE	0-1-0-0-0-1-0-0-0-0-0-1-0-0-1-0-0-0-0-0-0-0-0-0-0-0-0-0-0-0-0-0-0-0-1-0-0-0-0-1-1-1-1-1-1-1-0-1-1-1-1-1			28.2	0	0			XXMMVDQE				XXMMVDQE						XXMMVDQE			XXMMVDQE																				XXMMVDQE					XXMMVDQE	XXMMVDQE
--------
TDP014	MMVDQELSGNTIK^v	0-0-0-0-1-0-0-0-0-1-0-0-0-0-0-0-0-0-0-0-0-0-0-0-0-0-0-0-0-0-0-0-0-0-1-0-0-0-0-1-0-0-0-1-0-0-0-0-0-0-0-1			38.4	0	0
TDP014	MMVDQELSGNTIKV	1-1-1-1-1-1-1-1-1-1-1-1-1-1-1-1-1-1-1-1-1-1-1-1-1-1-1-1-1-1-1-1-1-1-1-1-1-1-1-1-1-1-1-1-1-1-1-1-1-1-1-1	3 times in 3 NECs		39.2	37.5	0
TDP014	m^MVDQELSGNTIKV	0-0-0-0-1-0-0-0-0-0-0-0-0-0-0-0-0-0-0-0-0-0-0-0-0-0-0-0-0-0-0-0-0-0-0-0-0-0-0-0-0-0-1-1-0-0-1-1-0-0-1-1			33	0	0
TDP014	mm^VDQELSGNTIKV	0-1-0-0-0-1-0-0-0-0-0-1-0-0-1-0-0-0-0-0-0-0-0-0-0-0-0-0-0-0-0-0-0-0-1-0-0-0-0-1-1-1-1-1-1-1-0-1-1-1-1-1			28.2	0	0
TDP014	mmvdq^ELSGNTIKV	0-0-0-0-0-0-0-0-0-0-0-0-0-0-0-0-0-0-0-0-0-0-0-0-0-0-0-0-0-0-0-0-0-0-0-0-0-0-0-0-0-0-0-1-0-0-0-1-0-0-0-0			17.1	0	0
TDP014	mmvdqe^LSGNTIKV	0-0-0-0-0-0-0-0-0-0-0-0-0-0-0-0-0-0-0-0-0-0-0-0-0-0-0-0-0-0-0-0-0-0-0-0-0-0-0-0-0-0-1-0-0-0-1-1-0-0-1-1			19.1	0	0
TDP014	mmvd^QELSGNTIKV	0-0-0-0-0-0-0-0-0-0-0-0-0-0-0-0-0-0-0-0-0-0-0-0-0-0-0-0-0-0-0-0-0-0-0-0-0-0-0-0-0-1-1-0-0-0-1-1-0-0-1-1			18.3	0	0
TDP015	DRGWYLAI	1-1-1-1-1-0-0-0-0-0-0-0-1-1-0-0-0-1-0-0-0-0-0-0-0-0-0-0-0-0-0-0-0-0-0-0-0-0-0-0-1-1-2-2-1-1-1-2-0-1-1-1			22.6	0	0		DRGWYLAI	DRGWYLAI	DRGWYLAI	DRGWYLAI	DRGWYLAI								DRGWYLAI	DRGWYLAI				DRGWYLAI																							DRGWYLAI
TDP015	RGWYLAIQ	0-1-1-1-1-0-0-0-0-1-1-1-1-1-0-0-1-1-0-0-0-0-0-0-0-0-0-0-0-0-0-0-0-0-0-0-0-0-0-0-1-1-1-0-1-1-2-1-1-0-1-1			24.9	0	0			RGWYLAIQ	RGWYLAIQ	RGWYLAIQ	RGWYLAIQ					RGWYLAIQ	RGWYLAIQ	RGWYLAIQ	RGWYLAIQ	RGWYLAIQ			RGWYLAIQ	RGWYLAIQ																							RGWYLAIQ
TDP015	GWYLAIQA	0-1-1-1-1-0-0-0-0-0-0-0-1-1-0-0-0-1-0-0-0-0-0-0-0-0-0-0-0-0-0-0-0-0-0-0-0-0-0-0-1-1-1-0-1-1-1-1-1-1-1-0			24.2	0	0			GWYLAIQA	GWYLAIQA	GWYLAIQA	GWYLAIQA								GWYLAIQA	GWYLAIQA				GWYLAIQA																							GWYLAIQA
TDP015	WYLAIQAV	0-0-0-0-0-0-0-0-0-1-0-0-0-1-0-0-0-0-0-0-0-0-0-0-0-0-0-0-0-0-0-0-0-0-0-0-0-0-0-0-1-0-0-0-0-1-2-0-0-0-0-0			18.2	0	0											WYLAIQAV				WYLAIQAV																											WYLAIQAV
TDP015	YLAIQAVX	0-0-0-0-0-0-0-0-0-0-0-0-0-0-0-0-0-0-0-0-0-0-0-0-0-0-0-0-0-0-0-0-0-0-0-0-0-0-0-0-1-1-0-0-1-1-1-0-1-1-0-0			22.3	0	0																																										YLAIQAVX
TDP015	LAIQAVXX	1-1-1-1-0-1-1-1-1-1-1-1-1-1-0-0-0-0-0-0-0-0-0-0-0-0-0-0-0-0-0-0-1-1-1-0-0-0-1-0-1-0-0-0-1-1-2-0-1-2-0-0			28.6	0	0		LAIQAVXX	LAIQAVXX	LAIQAVXX	LAIQAVXX		LAIQAVXX	LAIQAVXX	LAIQAVXX	LAIQAVXX	LAIQAVXX	LAIQAVXX	LAIQAVXX	LAIQAVXX	LAIQAVXX																			LAIQAVXX	LAIQAVXX	LAIQAVXX				LAIQAVXX		LAIQAVXX
TDP015	AIQAVXXX	0-0-1-0-0-0-1-1-1-1-0-1-0-0-0-1-1-1-0-0-0-0-0-0-0-0-0-0-0-0-0-0-0-0-0-0-0-0-0-0-0-0-0-0-0-0-0-0-0-0-0-0			23.4	0	0				AIQAVXXX				AIQAVXXX	AIQAVXXX	AIQAVXXX	AIQAVXXX		AIQAVXXX				AIQAVXXX	AIQAVXXX	AIQAVXXX
TDP015	XXXAMTDR	0-0-0-0-0-0-0-0-0-0-0-0-0-0-0-0-0-0-0-0-0-0-0-0-0-0-0-0-0-0-0-0-0-0-0-0-0-0-0-0-0-0-1-1-0-1-3-1-0-0-0-0			20.6	0	0
TDP015	XXAMTDRG	0-0-0-0-0-0-0-0-0-0-0-0-0-0-0-0-0-0-0-0-0-0-0-0-0-0-0-0-0-0-0-0-0-0-0-0-0-0-0-0-0-1-0-0-0-1-1-0-1-2-1-0			22.9	0	0
--------
TDP015	AMTDRGWYLAIQAV	1-1-1-1-0-1-1-1-1-1-1-1-1-0-1-1-1-1-1-1-1-1-1-1-1-1-1-1-1-1-1-1-1-1-1-1-1-1-1-1-1-1-1-0-1-1-1-1-1-1-1-0	3 times in 3 NECs		31.9	31	0
TDP015	AMTDRGWY^laiqav	0-1-1-1-1-0-0-0-0-1-1-1-1-1-0-0-1-1-0-0-0-0-0-0-0-0-0-0-0-0-0-0-0-0-0-0-0-0-0-0-1-1-1-0-1-1-1-1-1-0-1-1			24.9	0	0
TDP015	AMTDRGWYLAIQ^av	1-1-1-1-0-1-1-1-1-1-1-1-1-1-0-0-0-0-0-0-0-0-0-0-0-0-0-0-0-0-0-0-1-1-1-0-0-0-1-0-1-0-0-0-1-1-1-0-1-1-0-0			28.6	0	0
TDP015	a^MTDRGWYLAIQAV	0-0-0-0-0-0-0-0-0-0-0-0-0-0-0-0-0-0-0-0-0-0-0-0-0-0-0-0-0-0-0-0-0-0-0-0-0-0-0-0-0-0-0-0-0-1-1-0-0-0-0-0			18	0	0
TDP015	AMTDRGW^ylaiqav	1-1-1-1-1-0-0-0-0-0-0-0-1-1-0-0-0-1-0-0-0-0-0-0-0-0-0-0-0-0-0-0-0-0-0-0-0-0-0-0-1-1-1-1-1-1-1-1-0-1-1-1			22.6	0	0
TDP015	AMTDRGWYLAIQA^v	0-0-1-0-0-0-1-1-1-1-0-1-0-0-0-1-1-1-0-0-0-0-0-0-0-0-0-0-0-0-0-0-0-0-0-0-0-0-0-0-0-0-0-0-0-0-0-0-0-0-0-0			23.4	0	0
TDP015	am^TDRGWYLAIQAV	0-0-0-0-0-0-0-0-0-0-0-0-0-0-0-0-0-0-0-0-0-0-0-0-0-0-0-0-0-0-0-0-0-0-0-0-0-0-0-0-0-1-0-0-0-1-0-0-1-1-1-0			22.9	0	0
TDP015	AMTDRGWYL^aiqav	0-1-1-1-1-0-0-0-0-0-0-0-1-1-0-0-0-1-0-0-0-0-0-0-0-0-0-0-0-0-0-0-0-0-0-0-0-0-0-0-1-1-1-0-1-1-1-1-1-1-1-0			24.2	0	0
TDP015	a^MTDRGWY^laiqav	0-0-0-0-0-0-0-0-0-0-0-0-0-0-0-0-0-0-0-0-0-0-0-0-0-0-0-0-0-0-0-0-0-0-0-0-0-0-0-0-0-0-0-0-0-0-1-0-0-0-0-0			20.6	0	0
TDP015	am^TDRGWYLAIQ^av	0-0-0-0-0-0-0-0-0-0-0-0-0-0-0-0-0-0-0-0-0-0-0-0-0-0-0-0-0-0-0-0-0-0-0-0-0-0-0-0-0-0-0-0-0-0-1-0-0-1-0-0			18.7	0	0
TDP015	AMTDRGWYLAI^qav	0-0-0-0-0-0-0-0-0-0-0-0-0-0-0-0-0-0-0-0-0-0-0-0-0-0-0-0-0-0-0-0-0-0-0-0-0-0-0-0-1-1-0-0-1-1-1-0-1-1-0-0			22.3	0	0
TDP015	AMTDRGWYLA^iqav	0-0-0-0-0-0-0-0-0-1-0-0-0-1-0-0-0-0-0-0-0-0-0-0-0-0-0-0-0-0-0-0-0-0-0-0-0-0-0-0-1-0-0-0-0-1-1-0-0-0-0-0			17.1	0	0
TDP015	a^MTDRGWYLA^iqav	0-0-0-0-0-0-0-0-0-0-0-0-0-0-0-0-0-0-0-0-0-0-0-0-0-0-0-0-0-0-0-0-0-0-0-0-0-0-0-0-0-0-0-0-0-0-1-0-0-0-0-0			18.2	0	0
TDP015	a^MTDRGW^ylaiqav	0-0-0-0-0-0-0-0-0-0-0-0-0-0-0-0-0-0-0-0-0-0-0-0-0-0-0-0-0-0-0-0-0-0-0-0-0-0-0-0-0-0-1-1-0-0-0-1-0-0-0-0			17.5	0	0
TDP016	XSMQFNVK	0-0-0-0-0-0-0-0-0-0-0-0-0-0-0-0-0-0-0-0-0-0-0-0-0-0-0-0-0-0-0-0-0-0-0-0-0-0-0-0-0-0-0-0-0-0-0-0-0-0-1-0			26.3	0	0
TDP016	QFNVKSHP	0-0-0-0-0-0-0-0-0-0-0-0-0-0-0-0-0-0-0-0-0-0-0-0-0-0-0-0-0-0-0-0-0-0-0-0-0-0-0-0-0-0-0-1-0-0-1-1-0-0-1-1			18.7	0	0
TDP016	XXXSMQFN	0-1-0-0-0-0-0-0-0-0-0-0-0-0-0-0-0-0-0-0-0-0-0-0-0-0-0-0-1-0-0-0-0-0-0-0-0-0-0-0-0-0-0-0-0-0-0-0-0-0-0-0			15.7	0	0			XXXSMQFN																											XXXSMQFN
TDP016	SMQFNVKS	0-0-1-1-1-0-0-0-0-0-0-0-0-0-0-0-0-0-0-0-0-0-0-0-0-0-0-0-0-0-0-0-0-0-0-0-0-0-0-0-0-0-1-1-0-1-1-1-0-1-1-1			25.2	0	0				SMQFNVKS	SMQFNVKS	SMQFNVKS
TDP016	XXSMQFNV	0-0-0-0-0-0-0-0-0-0-0-0-0-0-0-0-0-0-0-0-0-0-0-0-0-0-0-0-0-0-0-0-0-0-0-0-0-0-0-0-0-0-0-0-0-0-1-1-0-0-1-0			24.9	0	0
TDP016	FNVKSHPE	0-0-0-0-0-0-0-0-0-0-0-0-0-0-0-0-0-0-0-0-0-0-0-0-0-0-0-0-0-0-0-0-0-0-0-0-0-0-0-0-2-2-1-1-0-2-2-2-1-2-2-2			20.9	0	0																																										FNVKSHPE
TDP016	NVKSHPEE	0-0-0-0-0-0-0-0-0-0-0-0-0-0-0-0-0-0-0-0-0-0-0-0-0-0-0-0-0-0-0-0-0-0-0-0-0-0-0-0-0-1-1-0-0-1-1-1-0-0-0-0			20.3	0	0
TDP016	SHPEELVX	0-0-0-0-0-0-0-0-0-0-0-0-0-0-0-0-0-0-0-0-0-0-0-0-0-0-0-0-0-0-0-0-0-0-0-0-0-0-0-0-0-0-1-0-0-0-1-1-0-0-0-0			20.2	0	0
TDP016	HPEELVXX	0-0-0-1-1-0-1-0-0-1-0-0-1-0-0-0-0-0-0-0-0-0-0-0-0-0-0-0-0-0-0-0-0-1-0-0-0-0-0-1-0-0-0-0-0-0-0-1-0-0-1-0			27.8	0	0					HPEELVXX	HPEELVXX		HPEELVXX			HPEELVXX			HPEELVXX																					HPEELVXX						HPEELVXX
TDP016	MQFNVKSH	0-0-0-0-0-0-0-0-0-0-0-0-0-0-0-0-0-0-0-0-0-0-0-0-0-0-0-0-0-0-0-0-0-0-0-0-0-0-0-0-0-0-0-1-0-0-1-1-0-0-1-1			22.5	0	0
--------
TDP016	SMQFNVKSHPEELV	1-1-1-1-1-1-1-1-1-1-1-1-1-1-1-1-1-1-1-1-1-1-1-1-1-1-1-1-1-1-1-0-1-1-1-1-1-1-1-1-1-1-1-1-1-1-1-1-1-1-1-1	3 times in 3 NECs		37.1	28.6	0
TDP016	SMQFNVKSHPEE^lv	0-0-0-1-1-0-1-0-0-1-0-0-1-0-0-0-0-0-0-0-0-0-0-0-0-0-0-0-0-0-0-0-0-1-0-0-0-0-0-1-0-0-0-0-0-0-0-1-0-0-1-0			27.8	0	0
TDP016	SMQFNVKSHPE^elv	0-0-0-0-0-0-0-0-0-0-0-0-0-0-0-0-0-0-0-0-0-0-0-0-0-0-0-0-0-0-0-0-0-0-0-0-0-0-0-0-0-0-1-0-0-0-1-1-0-0-0-0			20.2	0	0
TDP016	sm^QFNVKSHPEELV	0-0-0-0-0-0-0-0-0-0-0-0-0-0-0-0-0-0-0-0-0-0-0-0-0-0-0-0-0-0-0-0-0-0-0-0-0-0-0-0-0-0-0-0-0-0-1-1-0-0-1-0			24.9	0	0
TDP016	smq^FNVKSHPEELV	0-0-0-0-0-0-0-0-0-0-0-0-0-0-0-0-0-0-0-0-0-0-0-0-0-0-0-0-0-0-0-0-0-0-0-0-0-0-0-0-0-0-0-0-0-0-0-0-0-0-1-0			26.3	0	0
TDP016	smqfnvk^SHPEELV	0-0-0-0-0-0-0-0-0-0-0-0-0-0-0-0-0-0-0-0-0-0-0-0-0-0-0-0-0-0-0-0-0-0-0-0-0-0-0-0-1-1-0-1-0-1-1-1-0-1-1-1			17.1	0	0
TDP016	smqf^NVKSHPEELV	0-0-1-1-1-0-0-0-0-0-0-0-0-0-0-0-0-0-0-0-0-0-0-0-0-0-0-0-0-0-0-0-0-0-0-0-0-0-0-0-0-0-1-1-0-1-1-1-0-1-1-1			25.2	0	0
TDP016	smqfnv^KSHPEELV	0-0-0-0-0-0-0-0-0-0-0-0-0-0-0-0-0-0-0-0-0-0-0-0-0-0-0-0-0-0-0-0-0-0-0-0-0-0-0-0-0-0-0-1-0-0-1-1-0-0-1-1			18.7	0	0
TDP016	SMQFNVKS^hpeelv	0-0-0-0-0-0-0-0-0-0-0-0-0-0-0-0-0-0-0-0-0-0-0-0-0-0-0-0-0-0-0-0-0-0-0-0-0-0-0-0-0-1-1-0-0-1-1-1-0-0-0-0			20.3	0	0
TDP016	SMQFNVK^shpeelv	0-0-0-0-0-0-0-0-0-0-0-0-0-0-0-0-0-0-0-0-0-0-0-0-0-0-0-0-0-0-0-0-0-0-0-0-0-0-0-0-1-1-1-0-0-1-1-1-1-1-1-1			20.9	0	0
TDP016	smqfn^VKSHPEELV	0-0-0-0-0-0-0-0-0-0-0-0-0-0-0-0-0-0-0-0-0-0-0-0-0-0-0-0-0-0-0-0-0-0-0-0-0-0-0-0-0-0-0-1-0-0-1-1-0-0-1-1			22.5	0	0
TDP016	s^MQFNVKSHPEELV	0-1-0-0-0-0-0-0-0-0-0-0-0-0-0-0-0-0-0-0-0-0-0-0-0-0-0-0-1-0-0-0-0-0-0-0-0-0-0-0-0-0-0-0-0-0-0-0-0-0-0-0			15.7	0	0
TDP017	XXRMENYM	0-0-0-0-0-0-0-0-0-0-1-1-0-0-0-0-0-0-0-0-0-0-0-0-0-0-0-0-0-0-0-0-0-0-0-0-0-0-0-0-1-0-1-0-0-1-1-0-1-1-1-1			26.3	0	0												XXRMENYM	XXRMENYM																													XXRMENYM
TDP017	VLTKAAPV	0-0-0-0-0-0-0-0-1-1-0-1-1-0-0-0-0-0-0-0-0-0-0-0-0-0-0-0-0-0-0-0-0-0-0-0-0-0-0-1-1-2-4-0-1-1-2-1-1-1-2-1			29	0	0										VLTKAAPV	VLTKAAPV		VLTKAAPV	VLTKAAPV																											VLTKAAPV	VLTKAAPV
TDP017	XXXRMENY	0-0-0-0-0-0-0-0-0-0-0-0-0-0-0-0-0-0-0-0-0-0-0-0-0-0-0-0-0-0-0-0-0-0-0-0-0-0-0-0-0-1-1-0-1-0-1-2-1-1-0-0			29	0	0
TDP017	NYMVLTKA	0-0-0-0-0-0-0-0-0-0-0-0-0-0-0-0-0-0-0-0-0-0-0-0-0-0-0-0-0-0-0-0-0-0-0-0-0-0-0-0-0-0-0-0-0-0-1-1-0-0-1-0			15.6	0	0
TDP017	MENYMVLT	1-1-1-1-2-0-0-1-0-0-1-1-1-1-1-1-1-2-0-0-0-0-0-0-0-0-0-0-0-0-0-1-0-1-1-0-0-0-0-0-1-1-1-0-1-1-1-1-1-1-1-0			23.5	0	0		MENYMVLT	MENYMVLT	MENYMVLT	MENYMVLT	MENYMVLT			MENYMVLT			MENYMVLT	MENYMVLT	MENYMVLT	MENYMVLT	MENYMVLT	MENYMVLT	MENYMVLT	MENYMVLT														MENYMVLT		MENYMVLT	MENYMVLT						MENYMVLT
TDP017	TKAAPVXX	0-0-0-0-1-0-0-0-0-0-0-0-1-0-0-0-1-1-0-0-0-0-0-0-0-0-0-0-0-0-0-0-0-0-0-0-0-0-0-0-0-0-0-0-0-0-0-0-0-0-0-0			22.9	0	0						TKAAPVXX								TKAAPVXX				TKAAPVXX	TKAAPVXX
TDP017	XRMENYMV	0-0-0-0-0-0-0-0-0-0-0-0-0-0-0-0-0-0-0-0-0-0-0-0-0-0-0-0-0-0-0-0-0-0-0-0-0-0-0-0-1-1-1-0-0-0-1-0-1-1-2-0			22.8	0	0																																										XRMENYMV
TDP017	KAAPVXXX	0-0-1-1-1-0-1-0-1-1-0-1-1-1-0-1-1-2-0-1-1-1-0-0-0-0-0-0-0-1-0-0-0-0-0-0-0-0-0-0-0-1-0-0-0-1-1-0-1-1-2-0			31.3	0	0				KAAPVXXX	KAAPVXXX	KAAPVXXX		KAAPVXXX		KAAPVXXX	KAAPVXXX		KAAPVXXX	KAAPVXXX	KAAPVXXX		KAAPVXXX	KAAPVXXX	KAAPVXXX		KAAPVXXX	KAAPVXXX	KAAPVXXX								KAAPVXXX
TDP017	YMVLTKAA	0-1-1-1-0-0-0-0-0-0-0-1-1-1-0-1-1-1-0-0-0-0-0-0-0-0-0-0-0-0-0-0-0-0-0-0-0-0-0-0-1-1-0-0-1-1-1-1-0-0-1-0			21	0	0			YMVLTKAA	YMVLTKAA	YMVLTKAA								YMVLTKAA	YMVLTKAA	YMVLTKAA		YMVLTKAA	YMVLTKAA	YMVLTKAA																							YMVLTKAA
TDP017	MVLTKAAP	0-0-0-0-0-0-0-0-0-0-0-0-0-0-0-0-0-0-0-0-0-0-0-0-0-0-0-0-0-0-0-0-0-0-0-0-0-0-0-0-0-1-1-0-0-1-1-1-1-1-1-0			22.4	0	0
TDP017	LTKAAPVX	0-0-0-0-0-0-0-0-0-0-0-0-1-0-0-0-0-0-0-0-0-0-0-0-0-0-0-0-0-0-0-0-0-0-0-0-0-0-0-0-0-1-0-0-1-1-1-0-0-1-1-0			30.4	0	0														LTKAAPVX
TDP017	ENYMVLTK	0-0-0-0-0-0-0-0-0-0-0-0-0-0-0-0-0-0-0-0-0-0-0-0-0-0-0-0-0-0-0-0-0-0-0-0-0-0-0-0-0-0-1-0-0-0-1-0-0-1-1-0			21.3	0	0
TDP017	RMENYMVL	1-1-0-1-2-0-1-0-0-1-0-1-0-1-0-0-1-2-0-0-0-0-0-0-0-0-0-0-0-0-0-0-0-0-0-0-0-0-0-0-0-1-2-0-0-1-2-0-0-0-2-0			23.9	0	0		RMENYMVL	RMENYMVL		RMENYMVL	RMENYMVL		RMENYMVL			RMENYMVL		RMENYMVL		RMENYMVL			RMENYMVL	RMENYMVL
--------
TDP017	RMENYMVLTKAAPV	1-1-1-1-1-1-1-1-1-1-1-1-1-1-1-1-1-1-1-1-1-1-1-1-1-1-1-1-1-1-1-1-1-1-1-1-1-1-1-1-1-1-0-1-1-1-1-1-1-1-1-1	3 times in 3 NECs		41.8	35.4	0
TDP017	RMENYMVLTKAAP^v	0-0-1-1-0-0-1-0-1-1-0-1-1-0-0-1-1-1-0-1-1-1-0-0-0-0-0-0-0-1-0-0-0-0-0-0-0-0-0-0-0-1-0-0-0-1-1-0-1-1-1-0			31.3	0	0
TDP017	r^MENYMVLTKAAPV	0-0-0-0-0-0-0-0-0-0-0-0-0-0-0-0-0-0-0-0-0-0-0-0-0-0-0-0-0-0-0-0-0-0-0-0-0-0-0-0-0-0-0-0-1-0-1-1-1-1-0-0			28.8	0	0
TDP017	RMENYMVLTKA^apv	0-0-0-0-0-0-0-0-0-0-0-0-1-0-0-0-0-0-0-0-0-0-0-0-0-0-0-0-0-0-0-0-0-0-0-0-0-0-0-0-0-1-0-0-1-1-1-0-0-1-1-0			30.4	0	0
TDP017	rm^ENYMVLTKAAPV	0-0-0-0-0-0-0-0-0-0-1-1-0-0-0-0-0-0-0-0-0-0-0-0-0-0-0-0-0-0-0-0-0-0-0-0-0-0-0-0-1-0-0-0-0-1-1-0-1-1-1-0			26.3	0	0
TDP017	r^MENYMVLTK^aapv	0-0-0-0-0-0-0-0-0-0-0-0-0-0-0-0-0-0-0-0-0-0-0-0-0-0-0-0-0-0-0-0-0-0-0-0-0-0-0-0-0-1-1-0-0-0-0-1-0-0-0-0			29	0	0
TDP017	rmen^YMVLTKAAPV	1-1-0-1-1-0-1-0-0-1-0-1-0-0-0-0-1-1-0-0-0-0-0-0-0-0-0-0-0-0-0-0-0-0-0-0-0-0-0-0-0-1-1-0-0-1-1-0-0-0-1-0			23.9	0	0
TDP017	rme^NYMVLTKAAPV	0-0-0-0-0-0-0-0-0-0-0-0-0-0-0-0-0-0-0-0-0-0-0-0-0-0-0-0-0-0-0-0-0-0-0-0-0-0-0-0-1-1-1-0-0-0-1-0-1-1-1-0			22.8	0	0
TDP017	rm^ENYMVLTK^aapv	0-0-0-0-0-0-0-0-0-0-0-0-0-0-0-0-0-0-0-0-0-0-0-0-0-0-0-0-0-0-0-0-0-0-0-0-0-0-0-0-0-0-1-0-0-0-0-0-0-0-0-1			20.7	0	0
TDP017	RMENYMVLTKAA^pv	0-0-0-0-0-0-0-0-0-0-0-0-1-0-0-0-1-0-0-0-0-0-0-0-0-0-0-0-0-0-0-0-0-0-0-0-0-0-0-0-0-0-0-0-0-0-0-0-0-0-0-0			22.9	0	0
TDP017	RMENYMVLT^kaapv	0-0-0-0-0-0-0-0-0-0-0-0-0-0-0-0-0-0-0-0-0-0-0-0-0-0-0-0-0-0-0-0-0-0-0-0-0-0-0-0-0-1-1-0-0-1-1-1-1-1-1-0			22.4	0	0
TDP017	RMENYMVLTK^aapv	0-0-0-0-0-0-0-0-1-1-0-1-1-0-0-0-0-0-0-0-0-0-0-0-0-0-0-0-0-0-0-0-0-0-0-0-0-0-0-1-1-1-1-0-1-1-1-0-1-1-1-0			24.8	0	0
TDP017	rmeny^MVLTKAAPV	1-1-1-1-1-0-0-1-0-0-1-1-1-1-1-1-1-1-0-0-0-0-0-0-0-0-0-0-0-0-0-1-0-1-1-0-0-0-0-0-1-1-1-0-1-1-1-1-1-1-1-0			23.5	0	0
TDP017	rmenym^VLTKAAPV	0-0-0-0-0-0-0-0-0-0-0-0-0-0-0-0-0-0-0-0-0-0-0-0-0-0-0-0-0-0-0-0-0-0-0-0-0-0-0-0-0-0-1-0-0-0-1-0-0-1-1-0			21.3	0	0
TDP017	RMENYMVL^tkaapv	0-1-1-1-0-0-0-0-0-0-0-1-1-1-0-1-1-1-0-0-0-0-0-0-0-0-0-0-0-0-0-0-0-0-0-0-0-0-0-0-1-1-0-0-1-1-1-1-0-0-1-0			21	0	0
TDP017	rmen^YMVLTKAAP^v	0-0-0-0-1-0-0-0-0-0-0-0-0-1-0-0-0-1-0-0-0-0-0-0-0-0-0-0-0-0-0-0-0-0-0-0-0-0-0-0-0-0-0-0-0-0-0-0-0-0-0-0			16.7	0	0
TDP017	rmeny^MVLTKAA^pv	0-0-0-0-1-0-0-0-0-0-0-0-0-0-0-0-0-1-0-0-0-0-0-0-0-0-0-0-0-0-0-0-0-0-0-0-0-0-0-0-0-0-0-0-0-0-0-0-0-0-0-0			15.5	0	0
TDP017	rmen^YMVLTK^aapv	0-0-0-0-0-0-0-0-0-0-0-0-0-0-0-0-0-0-0-0-0-0-0-0-0-0-0-0-0-0-0-0-0-0-0-0-0-0-0-0-0-0-1-0-0-0-1-0-0-0-1-0			16.2	0	0
TDP017	rme^NYMVLTKAAP^v	0-0-0-0-0-0-0-0-0-0-0-0-0-0-0-0-0-0-0-0-0-0-0-0-0-0-0-0-0-0-0-0-0-0-0-0-0-0-0-0-0-0-0-0-0-0-0-0-0-0-1-0			17.1	0	0
TDP017	rmenymv^LTKAAPV	0-0-0-0-0-0-0-0-0-0-0-0-0-0-0-0-0-0-0-0-0-0-0-0-0-0-0-0-0-0-0-0-0-0-0-0-0-0-0-0-0-0-0-0-0-0-1-1-0-0-1-0			15.6	0	0
TDP018	XXYMDSIR	1-0-0-0-0-1-0-1-0-0-1-1-0-0-1-1-0-0-0-0-0-1-0-0-0-0-0-0-0-0-0-0-0-0-0-0-0-0-0-1-1-1-1-2-0-0-2-2-1-2-2-2			30	0	0		XXYMDSIR					XXYMDSIR		XXYMDSIR			XXYMDSIR	XXYMDSIR			XXYMDSIR	XXYMDSIR						XXYMDSIR																		XXYMDSIR	XXYMDSIR
TDP018	HQGPFWML	0-0-0-0-0-0-0-0-0-0-0-0-0-0-0-0-0-0-0-0-1-1-0-0-0-0-0-0-0-1-0-0-0-0-0-0-0-0-0-0-1-0-1-3-1-1-2-3-1-1-1-2			30.7	0	0																						HQGPFWML	HQGPFWML								HQGPFWML											HQGPFWML
TDP018	QGPFWMLX	0-0-0-0-0-0-0-0-0-0-0-0-0-0-0-0-0-0-0-0-0-0-0-0-0-0-0-0-0-0-0-0-0-0-0-0-0-0-0-0-0-0-2-1-0-0-1-1-0-1-2-2			34.9	0	0
TDP018	GPFWMLXX	0-1-0-1-2-0-1-1-1-1-0-2-2-1-0-0-0-0-0-0-0-0-0-0-0-0-0-0-0-0-0-0-0-1-1-0-0-0-0-1-1-2-3-0-1-2-4-0-1-3-4-2			41.8	0	0			GPFWMLXX		GPFWMLXX	GPFWMLXX		GPFWMLXX	GPFWMLXX	GPFWMLXX	GPFWMLXX		GPFWMLXX	GPFWMLXX	GPFWMLXX																				GPFWMLXX	GPFWMLXX					GPFWMLXX	GPFWMLXX
TDP018	XXXYMDSI	0-1-0-0-0-1-0-0-0-0-1-0-0-0-1-1-0-0-0-1-1-1-0-0-0-0-0-0-1-0-0-0-1-1-0-1-0-0-1-1-1-0-1-1-1-0-3-2-1-1-1-1			28.8	0	0			XXXYMDSI				XXXYMDSI					XXXYMDSI				XXXYMDSI	XXXYMDSI				XXXYMDSI	XXXYMDSI	XXXYMDSI							XXXYMDSI				XXXYMDSI	XXXYMDSI		XXXYMDSI			XXXYMDSI	XXXYMDSI	XXXYMDSI
TDP018	IRHQGPFW	0-0-0-0-0-0-0-0-0-0-0-0-0-0-0-0-0-0-0-0-0-0-0-0-0-0-0-0-0-0-0-0-0-0-0-0-0-0-0-0-1-1-1-1-0-1-1-2-1-1-1-1			29.8	0	0																																										IRHQGPFW
TDP018	MDSIRHQG	0-0-0-0-0-0-0-0-0-0-0-0-0-0-0-0-0-0-0-0-0-0-0-0-0-0-0-0-0-0-0-0-0-0-0-0-0-0-0-0-1-0-0-0-0-1-0-0-1-0-0-0			16	0	0																																										MDSIRHQG
TDP018	XYMDSIRH	1-1-1-0-1-1-0-1-1-1-1-2-3-0-1-1-1-1-1-1-0-1-0-1-0-0-1-1-1-1-1-1-1-1-1-1-1-1-1-1-1-1-2-0-1-1-3-0-1-1-2-2	2 times in 3 NECs		28.2	20.5	0		XYMDSIRH	XYMDSIRH	XYMDSIRH		XYMDSIRH	XYMDSIRH		XYMDSIRH	XYMDSIRH	XYMDSIRH	XYMDSIRH	XYMDSIRH	XYMDSIRH		XYMDSIRH	XYMDSIRH	XYMDSIRH	XYMDSIRH	XYMDSIRH	XYMDSIRH		XYMDSIRH		XYMDSIRH			XYMDSIRH	XYMDSIRH	XYMDSIRH	XYMDSIRH	XYMDSIRH	XYMDSIRH	XYMDSIRH	XYMDSIRH	XYMDSIRH	XYMDSIRH	XYMDSIRH	XYMDSIRH	XYMDSIRH	XYMDSIRH	XYMDSIRH
TDP018	PFWMLXXX	0-1-0-0-1-0-0-0-0-1-0-1-2-0-0-0-1-1-0-0-0-0-0-0-0-0-0-0-0-0-0-0-0-0-0-0-0-0-0-0-1-0-0-0-0-0-1-0-0-0-0-0			22.5	0	0			PFWMLXXX			PFWMLXXX					PFWMLXXX		PFWMLXXX	PFWMLXXX				PFWMLXXX	PFWMLXXX																							PFWMLXXX
TDP018	DSIRHQGP	0-0-0-0-0-0-0-0-0-0-0-0-0-0-0-0-0-0-0-0-0-0-0-0-0-0-0-0-0-0-0-0-0-0-0-0-0-0-0-0-1-1-1-1-0-1-1-1-0-1-1-1			21.8	0	0																																										DSIRHQGP
TDP018	SIRHQGPF	0-0-0-0-0-0-0-0-0-0-0-0-0-0-0-0-0-0-0-0-0-0-0-0-0-0-0-0-0-0-0-0-0-0-0-0-0-0-0-0-0-0-1-1-0-0-1-1-0-0-1-1			25.3	0	0
TDP018	RHQGPFWM	0-0-0-0-0-0-0-0-0-0-0-0-0-0-0-0-0-0-0-0-0-0-0-0-0-0-0-0-0-0-0-0-0-0-0-0-0-0-0-0-0-0-0-0-0-0-1-0-0-0-0-0			20.6	0	0
--------
TDP018	YMDSIRHQGPFW^ml	0-1-0-1-1-0-1-1-1-0-0-1-1-1-0-0-0-0-0-0-0-0-0-0-0-0-0-0-0-0-0-0-0-1-1-0-0-0-0-1-1-1-1-0-1-1-1-0-1-1-1-0			41.8	0	0
TDP018	YMDSIRHQGPFWML	1-1-1-1-1-1-1-1-1-1-1-1-1-1-1-1-1-1-1-1-1-1-1-1-1-1-1-1-1-1-1-1-1-1-1-1-1-1-1-1-1-1-1-0-1-1-1-1-1-1-1-1	3 times in 3 NECs		37.2	23.2	0
TDP018	YMDSIRHQG^pfwml	0-0-0-0-0-0-0-0-0-0-0-0-0-0-0-0-0-0-0-0-0-0-0-0-0-0-0-0-0-0-0-0-0-0-0-0-0-0-0-0-0-0-0-0-0-0-1-0-0-0-0-0			20.6	0	0
TDP018	YMDSIRHQGP^fwml	0-0-0-0-0-0-0-0-0-0-0-0-0-0-0-0-0-0-0-0-1-1-0-0-0-0-0-0-0-1-0-0-0-0-0-0-0-0-0-0-1-0-1-1-1-1-1-1-1-1-1-1			30.7	0	0
TDP018	ym^DSIRHQGPFW^ml	0-0-0-0-0-0-0-0-0-0-0-0-0-0-0-0-0-0-0-0-0-0-0-0-0-0-0-0-0-0-0-0-0-0-0-0-0-0-0-0-0-0-1-0-0-0-1-0-0-1-1-1			27.4	0	0
TDP018	y^MDSIRHQGPFW^ml	0-0-0-0-0-0-0-0-0-0-0-0-0-0-0-0-0-0-0-0-0-0-0-0-0-0-0-0-0-0-0-0-0-0-0-0-0-0-0-0-0-0-0-0-0-0-1-0-0-0-1-0			28.8	0	0
TDP018	YMDSIRHQ^gpfwml	0-0-0-0-0-0-0-0-0-0-0-0-0-0-0-0-0-0-0-0-0-0-0-0-0-0-0-0-0-0-0-0-0-0-0-0-0-0-0-0-1-1-1-1-0-1-1-1-1-1-1-1			29.8	0	0
TDP018	YMDSIRH^qgpfwml	0-0-0-0-0-0-0-0-0-0-0-0-0-0-0-0-0-0-0-0-0-0-0-0-0-0-0-0-0-0-0-0-0-0-0-0-0-0-0-0-0-0-1-1-0-0-1-1-0-0-1-1			25.3	0	0
TDP018	YMDSIRHQGPF^wml	0-0-0-0-0-0-0-0-0-0-0-0-0-0-0-0-0-0-0-0-0-0-0-0-0-0-0-0-0-0-0-0-0-0-0-0-0-0-0-0-0-0-0-0-0-0-0-0-0-1-0-0			34.9	0	0
TDP018	ymd^SIRHQGPFW^ml	0-0-0-0-1-0-0-0-0-1-0-1-1-0-0-0-0-0-0-0-0-0-0-0-0-0-0-0-0-0-0-0-0-0-0-0-0-0-0-0-0-1-1-0-0-1-1-0-0-1-1-1			26.7	0	0
TDP018	YMDSIRHQGPFWM^l	0-1-0-0-1-0-0-0-0-1-0-1-1-0-0-0-1-1-0-0-0-0-0-0-0-0-0-0-0-0-0-0-0-0-0-0-0-0-0-0-1-0-0-0-0-0-1-0-0-0-0-0			22.5	0	0
TDP018	ymd^SIRHQGPF^wml	0-0-0-0-0-0-0-0-0-0-0-0-0-0-0-0-0-0-0-0-0-0-0-0-0-0-0-0-0-0-0-0-0-0-0-0-0-0-0-0-0-0-1-0-0-0-1-0-0-0-1-1			19.2	0	0
TDP018	ym^DSIRHQGP^fwml	0-0-0-0-0-0-0-0-0-0-0-0-0-0-0-0-0-0-0-0-0-0-0-0-0-0-0-0-0-0-0-0-0-0-0-0-0-0-0-0-0-0-0-1-0-0-0-1-0-0-0-0			30	0	0
TDP018	y^MDSIRHQGP^fwml	0-0-0-0-0-0-0-0-0-0-0-0-0-0-0-0-0-0-0-0-0-0-0-0-0-0-0-0-0-0-0-0-0-0-0-0-0-0-0-0-0-0-0-1-0-0-1-1-0-0-0-1			24.1	0	0
TDP018	y^MDSIRHQGPFWML	0-1-0-0-0-1-0-0-0-0-1-0-0-0-1-1-0-0-0-1-1-1-0-0-0-0-0-0-1-0-0-0-1-1-0-1-0-0-1-1-1-0-0-0-1-0-1-0-1-1-0-0			22.6	0	0
TDP018	YMDSIR^hqgpfwml	0-0-0-0-0-0-0-0-0-0-0-0-0-0-0-0-0-0-0-0-0-0-0-0-0-0-0-0-0-0-0-0-0-0-0-0-0-0-0-0-1-1-1-1-0-1-1-1-0-1-1-1			21.8	0	0
TDP018	ymd^SIRHQGPFWML	1-1-1-0-0-1-0-1-1-0-1-1-1-0-1-1-1-1-1-1-0-1-0-1-0-0-1-1-1-1-1-1-1-1-1-1-1-1-1-1-1-0-0-0-1-0-1-0-1-0-0-0	2 times in 3 NECs		28.2	20.5	0
TDP018	ym^DSIRHQGPF^wml	0-0-0-0-0-0-0-0-0-0-0-0-0-0-0-0-0-0-0-0-0-0-0-0-0-0-0-0-0-0-0-0-0-0-0-0-0-0-0-0-0-0-0-1-0-0-0-1-0-0-1-1			18.6	0	0
TDP018	ym^DSIRHQGPFWML	1-0-0-0-0-1-0-1-0-0-1-1-0-0-1-1-0-0-0-0-0-1-0-0-0-0-0-0-0-0-0-0-0-0-0-0-0-0-0-1-1-1-0-0-0-0-1-0-1-1-0-0			27.7	0	0
TDP018	y^MDSIRHQGPF^wml	0-0-0-0-0-0-0-0-0-0-0-0-0-0-0-0-0-0-0-0-0-0-0-0-0-0-0-0-0-0-0-0-0-0-0-0-0-0-0-0-0-0-1-0-0-0-0-0-0-0-0-0			19	0	0
TDP018	ymdsi^RHQGPFWML	0-0-0-0-0-0-0-0-0-0-0-0-0-0-0-0-0-0-0-0-0-0-0-0-0-0-0-0-0-0-0-0-0-0-0-0-0-0-0-0-1-0-0-0-0-1-0-0-1-0-0-0			16	0	0
TDP018	ymd^SIRHQGPFWM^l	0-0-0-0-0-0-0-0-0-0-0-0-1-0-0-0-0-0-0-0-0-0-0-0-0-0-0-0-0-0-0-0-0-0-0-0-0-0-0-0-0-0-0-0-0-0-0-0-0-0-0-0			16.1	0	0
TDP018	y^MDSIRHQ^gpfwml	0-0-0-0-0-0-0-0-0-0-0-0-0-0-0-0-0-0-0-0-0-0-0-0-0-0-0-0-0-0-0-0-0-0-0-0-0-0-0-0-0-0-0-0-0-0-0-1-0-0-0-0			18.1	0	0
TDP019	PGQHRISD	0-0-0-0-0-0-0-0-0-0-0-0-0-0-0-0-0-0-0-0-0-0-0-0-0-0-0-0-0-0-0-0-0-0-0-0-0-0-0-0-0-0-1-1-0-1-0-1-0-0-1-1			15.9	0	0
TDP019	GQHRISDA	0-0-0-0-0-0-0-0-0-0-0-0-0-0-0-0-0-0-0-0-0-0-0-0-0-0-0-0-0-0-0-0-0-0-0-0-0-0-0-0-0-0-1-1-0-0-0-1-1-0-1-1			24.2	0	0
TDP019	QHRISDAE	0-0-0-0-0-0-0-0-0-0-0-0-0-0-0-0-0-0-0-0-0-0-0-0-0-0-0-0-0-0-0-0-0-0-0-0-0-0-0-0-0-0-0-0-0-0-1-1-0-1-1-1			25.4	0	0
TDP019	HRISDAEL	0-0-0-1-1-0-0-0-0-1-0-0-0-0-0-0-0-0-0-0-0-0-0-0-0-0-0-0-0-0-0-0-0-0-0-0-0-0-0-0-1-1-2-1-1-1-1-3-0-1-1-1			26.2	0	0					HRISDAEL	HRISDAEL					HRISDAEL																															HRISDAEL
TDP019	RISDAELX	1-1-1-1-1-1-1-1-1-1-1-1-1-1-1-1-1-1-1-2-1-1-1-1-1-1-2-1-1-1-1-1-1-1-1-1-1-1-1-1-1-1-1-1-1-1-2-2-1-1-2-0	3 times in 3 NECs		34.5	33.4	0		RISDAELX	RISDAELX	RISDAELX	RISDAELX	RISDAELX	RISDAELX	RISDAELX	RISDAELX	RISDAELX	RISDAELX	RISDAELX	RISDAELX	RISDAELX	RISDAELX	RISDAELX	RISDAELX	RISDAELX	RISDAELX	RISDAELX	RISDAELX	RISDAELX	RISDAELX	RISDAELX	RISDAELX	RISDAELX	RISDAELX	RISDAELX	RISDAELX	RISDAELX	RISDAELX	RISDAELX	RISDAELX	RISDAELX	RISDAELX	RISDAELX	RISDAELX	RISDAELX	RISDAELX	RISDAELX	RISDAELX	RISDAELX
TDP019	ISDAELXX	0-1-1-1-2-0-1-0-1-1-0-0-1-1-0-0-0-0-0-0-0-0-0-0-0-0-0-0-0-0-0-0-0-0-0-0-0-0-0-0-0-0-0-0-0-0-0-0-0-0-0-1			29.9	0	0			ISDAELXX	ISDAELXX	ISDAELXX	ISDAELXX		ISDAELXX		ISDAELXX	ISDAELXX			ISDAELXX	ISDAELXX
TDP019	SDAELXXX	0-0-1-1-1-0-1-1-0-1-0-0-0-1-0-0-0-0-0-0-0-0-0-0-0-0-0-0-0-0-0-0-0-1-1-0-0-1-1-1-0-0-0-0-0-1-1-1-0-0-0-0			27	0	0				SDAELXXX	SDAELXXX	SDAELXXX		SDAELXXX	SDAELXXX		SDAELXXX				SDAELXXX																				SDAELXXX	SDAELXXX			SDAELXXX	SDAELXXX	SDAELXXX
TDP019	XXDMFPGQ	0-0-0-0-0-0-0-0-0-0-0-0-0-0-0-0-0-0-0-2-0-1-0-0-0-0-2-1-1-1-0-0-0-0-0-0-0-0-0-0-0-0-0-0-0-0-0-1-1-0-0-0			28.6	0	0																					XXDMFPGQ		XXDMFPGQ					XXDMFPGQ	XXDMFPGQ	XXDMFPGQ	XXDMFPGQ
TDP019	DMFPGQHR	0-0-0-0-0-0-0-0-0-0-0-0-0-0-0-0-0-0-0-0-0-0-0-0-0-0-0-0-0-0-0-0-0-0-0-0-0-0-0-0-0-0-0-1-0-0-1-0-0-0-0-1			17.2	0	0
TDP019	FPGQHRIS	0-0-0-0-0-0-0-0-0-0-0-0-0-0-0-0-0-0-0-0-0-0-0-0-0-0-0-0-0-0-0-0-0-0-0-0-0-0-0-0-0-0-0-1-0-0-1-1-0-0-1-1			24.6	0	0
TDP019	XXXDMFPG	0-0-0-0-1-0-0-0-0-0-0-0-0-0-0-0-0-0-0-0-0-0-0-0-0-0-0-0-0-0-0-0-0-0-0-0-0-0-0-0-0-0-1-0-0-0-2-2-0-0-1-0			23.3	0	0						XXXDMFPG
TDP019	XDMFPGQH	0-0-0-0-0-0-0-1-0-0-0-0-0-0-0-0-0-0-1-1-0-1-0-0-0-0-1-1-0-1-0-0-0-0-0-0-0-0-0-0-0-0-0-0-0-0-0-0-0-0-0-0			20.4	0	0									XDMFPGQH											XDMFPGQH	XDMFPGQH		XDMFPGQH					XDMFPGQH	XDMFPGQH		XDMFPGQH
TDP019	MFPGQHRI	0-0-0-0-0-0-0-0-0-0-0-0-0-0-0-0-0-0-0-0-0-0-0-0-0-0-0-0-0-0-0-0-0-0-0-0-0-0-0-0-0-0-0-1-0-0-0-1-0-0-0-0			20.3	0	0
--------
TDP019	DMFPGQHRISD^ael	1-1-1-1-1-1-1-1-1-1-1-1-1-1-1-1-1-1-1-1-1-1-1-1-1-1-1-1-1-1-1-1-1-1-1-1-1-1-1-1-1-1-1-1-1-1-1-1-1-1-1-0	3 times in 3 NECs		34.5	33.4	0
TDP019	DMFPGQHR^isdael	0-0-0-0-0-0-0-0-0-0-0-0-0-0-0-0-0-0-0-0-0-0-0-0-0-0-0-0-0-0-0-0-0-0-0-0-0-0-0-0-0-0-1-1-0-0-0-1-1-0-1-1			24.2	0	0
TDP019	DMFPGQHRISDA^el	0-1-1-1-1-0-1-0-1-1-0-0-1-1-0-0-0-0-0-0-0-0-0-0-0-0-0-0-0-0-0-0-0-0-0-0-0-0-0-0-0-0-0-0-0-0-0-0-0-0-0-1			29.9	0	0
TDP019	d^MFPGQHRIS^dael	0-0-0-0-0-0-0-0-0-0-0-0-0-0-0-0-0-0-0-0-0-0-0-0-0-0-0-0-0-0-0-0-0-0-0-0-0-0-0-0-0-0-1-0-0-0-0-1-0-0-0-0			23.3	0	0
TDP019	DMFPGQHRISDAE^l	0-0-1-1-1-0-1-1-0-1-0-0-0-1-0-0-0-0-0-0-0-0-0-0-0-0-0-0-0-0-0-0-0-1-1-0-0-1-1-1-0-0-0-0-0-1-1-1-0-0-0-0			27	0	0
TDP019	DMFPGQHRIS^dael	0-0-0-1-1-0-0-0-0-1-0-0-0-0-0-0-0-0-0-0-0-0-0-0-0-0-0-0-0-0-0-0-0-0-0-0-0-0-0-0-1-1-1-1-1-1-1-1-0-1-1-1			26.2	0	0
TDP019	DMFPGQH^risdael	0-0-0-0-0-0-0-0-0-0-0-0-0-0-0-0-0-0-0-0-0-0-0-0-0-0-0-0-0-0-0-0-0-0-0-0-0-0-0-0-0-0-1-1-0-1-0-1-0-0-1-1			15.9	0	0
TDP019	DMFPGQHRI^sdael	0-0-0-0-0-0-0-0-0-0-0-0-0-0-0-0-0-0-0-0-0-0-0-0-0-0-0-0-0-0-0-0-0-0-0-0-0-0-0-0-0-0-0-0-0-0-1-1-0-1-1-1			25.4	0	0
TDP019	d^MFPGQHRISDA^el	0-0-0-0-1-0-0-0-0-0-0-0-0-0-0-0-0-0-0-0-0-0-0-0-0-0-0-0-0-0-0-0-0-0-0-0-0-0-0-0-0-0-0-0-0-0-0-0-0-0-0-0			16.1	0	0
TDP019	d^MFPGQHRISD^ael	0-0-0-0-0-0-0-0-0-0-0-0-0-0-0-0-0-0-0-0-0-0-0-0-0-0-0-0-0-0-0-0-0-0-0-0-0-0-0-0-0-0-0-0-0-0-1-1-0-0-1-0			23	0	0
TDP019	DMFPGQHRISDAEL	1-1-1-1-1-1-1-1-1-0-1-1-1-1-1-1-1-1-1-1-1-1-1-1-1-0-1-1-1-1-1-1-1-1-1-1-1-1-1-1-1-1-1-0-1-1-1-0-1-1-1-1	3 times in 3 NECs		27.9	24.8	0
TDP019	dm^FPGQHRISD^ael	0-0-0-0-0-0-0-0-0-0-0-0-0-0-0-0-0-0-0-1-0-0-0-0-0-0-1-0-0-0-0-0-0-0-0-0-0-0-0-0-0-0-0-0-0-0-0-0-0-0-0-0			23.1	0	0
TDP019	dm^FPGQHRIS^dael	0-0-0-0-0-0-0-0-0-0-0-0-0-0-0-0-0-0-0-0-0-0-0-0-0-0-0-0-0-0-0-0-0-0-0-0-0-0-0-0-0-0-0-0-0-0-0-1-0-0-0-0			18.9	0	0
TDP019	dmf^PGQHRISDAEL	0-0-0-0-0-0-0-1-0-0-0-0-0-0-0-0-0-0-1-1-0-1-0-0-0-0-1-1-0-1-0-0-0-0-0-0-0-0-0-0-0-0-0-0-0-0-0-0-0-0-0-0			20.4	0	0
TDP019	dmfpgq^HRISDAEL	0-0-0-0-0-0-0-0-0-0-0-0-0-0-0-0-0-0-0-0-0-0-0-0-0-0-0-0-0-0-0-0-0-0-0-0-0-0-0-0-0-0-0-1-0-0-1-1-0-0-1-1			24.6	0	0
TDP019	dm^FPGQHRISDAEL	0-0-0-0-0-0-0-0-0-0-0-0-0-0-0-0-0-0-0-1-0-1-0-0-0-0-1-1-1-1-0-0-0-0-0-0-0-0-0-0-0-0-0-0-0-0-0-0-1-0-0-0			28.6	0	0
TDP019	dmfpg^QHRISDAEL	0-0-0-0-0-0-0-0-0-0-0-0-0-0-0-0-0-0-0-0-0-0-0-0-0-0-0-0-0-0-0-0-0-0-0-0-0-0-0-0-0-0-0-1-0-0-0-1-0-0-0-0			20.3	0	0
TDP019	d^MFPGQHRISDAEL	0-0-0-0-0-0-0-0-0-0-0-0-0-0-0-0-0-0-0-0-0-0-0-0-0-0-0-0-0-0-0-0-0-0-0-0-0-0-0-0-0-0-0-0-0-0-1-0-0-0-0-0			20.1	0	0
TDP019	dmfp^GQHRISDAEL	0-0-0-0-0-0-0-0-0-0-0-0-0-0-0-0-0-0-0-0-0-0-0-0-0-0-0-0-0-0-0-0-0-0-0-0-0-0-0-0-0-0-0-1-0-0-1-0-0-0-0-1			17.2	0	0
TDP020	XQMKKTLV	0-0-0-0-0-0-0-0-0-0-0-0-0-0-0-0-0-0-0-0-0-0-0-0-0-0-0-0-0-0-0-0-0-0-0-0-0-0-0-0-0-1-0-0-0-0-0-0-1-2-0-0			17.6	0	0
TDP020	LVMYNEWN	0-0-0-0-1-0-0-0-0-0-0-0-0-0-0-0-1-1-0-0-0-0-0-0-0-0-0-0-0-0-0-0-0-0-0-0-0-0-0-0-0-2-0-0-0-1-1-0-0-2-0-0			18.6	0	0						LVMYNEWN												LVMYNEWN	LVMYNEWN
TDP020	KKTLVMYN	0-0-0-0-0-0-0-0-0-0-0-0-0-0-0-0-0-0-0-0-0-0-0-0-0-0-0-0-0-0-0-0-0-0-0-0-0-0-0-0-0-0-0-0-0-0-1-0-0-0-0-0			15.8	0	0
TDP020	KTLVMYNE	0-0-0-0-0-0-0-0-0-0-0-0-0-0-0-0-0-0-0-0-0-0-0-0-0-0-0-0-0-0-0-0-0-0-0-0-0-0-0-0-0-0-0-0-0-0-1-0-0-0-0-0			16.2	0	0
TDP020	VMYNEWNL	0-0-0-0-1-0-0-0-0-1-0-0-0-0-0-0-0-0-0-0-0-0-0-0-0-0-0-0-0-0-0-0-0-0-0-0-0-0-0-0-0-0-0-0-0-0-0-0-0-0-0-0			16.5	0	0						VMYNEWNL					VMYNEWNL
TDP020	MYNEWNLX	0-0-0-1-1-0-0-0-0-0-0-0-0-0-0-0-0-0-0-0-0-0-0-0-0-0-0-0-0-0-0-0-0-0-0-0-0-0-0-0-0-0-0-0-0-0-0-0-0-0-0-0			16.9	0	0					MYNEWNLX	MYNEWNLX
TDP020	YNEWNLXX	0-0-0-0-0-0-0-0-0-0-0-0-0-0-0-0-0-0-0-0-0-0-0-0-0-0-0-0-0-0-0-0-0-0-0-0-0-0-0-0-1-1-0-0-0-0-1-0-1-1-0-0			19.2	0	0																																										YNEWNLXX
--------
TDP020	QMKKTLVMYNEWNL	1-1-0-0-0-1-0-1-0-0-0-1-1-0-1-1-0-0-0-0-0-0-0-0-0-0-1-1-0-0-0-1-0-0-1-0-1-0-0-1-1-0-0-0-0-0-1-0-1-1-0-0	3 times in 3 NECs		19.2	20.8	0
TDP020	qmk^KTLVMYNEWNL	0-0-0-0-0-0-0-0-0-0-0-0-0-0-0-0-0-0-0-0-0-0-0-0-0-0-0-0-0-0-0-0-0-0-0-0-0-0-0-0-0-0-0-0-0-0-0-0-1-1-0-0			17.6	0	0
TDP020	QMKKTLVMYNEW^nl	0-0-0-0-0-0-0-0-0-0-0-0-0-0-0-0-0-0-0-0-0-0-0-0-0-0-0-0-0-0-0-0-0-0-0-0-0-0-0-0-1-1-0-0-0-0-1-0-1-1-0-0			19.2	0	0
TDP020	QMKKTLVMY^newnl	0-0-0-0-1-0-0-0-0-0-0-0-0-0-0-0-1-1-0-0-0-0-0-0-0-0-0-0-0-0-0-0-0-0-0-0-0-0-0-0-0-1-0-0-0-1-1-0-0-1-0-0			18.6	0	0
TDP020	QMKKTLVMYN^ewnl	0-0-0-0-1-0-0-0-0-1-0-0-0-0-0-0-0-0-0-0-0-0-0-0-0-0-0-0-0-0-0-0-0-0-0-0-0-0-0-0-0-0-0-0-0-0-0-0-0-0-0-0			16.5	0	0
TDP020	QMKKTLVMYNE^wnl	0-0-0-1-1-0-0-0-0-0-0-0-0-0-0-0-0-0-0-0-0-0-0-0-0-0-0-0-0-0-0-0-0-0-0-0-0-0-0-0-0-0-0-0-0-0-0-0-0-0-0-0			16.9	0	0
TDP020	QMKKTL^vmynewnl	0-0-0-0-0-0-0-0-0-0-0-0-0-0-0-0-0-0-0-0-0-0-0-0-0-0-0-0-0-0-0-0-0-0-0-0-0-0-0-0-0-0-0-0-0-0-1-0-0-0-0-0			15.8	0	0
TDP020	qmk^KTLVMY^newnl	0-0-0-0-0-0-0-0-0-0-0-0-0-0-0-0-0-0-0-0-0-0-0-0-0-0-0-0-0-0-0-0-0-0-0-0-0-0-0-0-0-1-0-0-0-0-0-0-0-1-0-0			16.1	0	0
TDP020	QMKKTLV^mynewnl	0-0-0-0-0-0-0-0-0-0-0-0-0-0-0-0-0-0-0-0-0-0-0-0-0-0-0-0-0-0-0-0-0-0-0-0-0-0-0-0-0-0-0-0-0-0-1-0-0-0-0-0			16.2	0	0
TDP021	XXPMEPHS	0-0-0-0-0-0-0-0-0-0-1-0-0-0-0-0-1-0-0-0-0-0-0-0-0-0-0-0-0-0-0-0-0-0-0-0-0-0-0-0-0-0-0-0-0-0-0-0-1-0-0-0			16.7	0	0												XXPMEPHS						XXPMEPHS
TDP021	PMEPHSKV	0-0-0-0-0-0-0-0-0-0-0-0-0-0-0-0-0-0-0-0-0-0-0-0-0-0-0-0-0-0-0-0-0-0-0-0-0-0-0-0-0-0-0-0-0-0-0-0-0-1-1-0			16.1	0	0
TDP021	EPHSKVNF	0-0-0-0-0-0-0-0-0-0-0-0-0-0-0-0-0-0-0-0-0-0-0-0-0-0-0-0-0-0-0-0-0-0-0-0-0-0-0-0-0-0-0-0-0-0-1-0-0-0-0-1			18.3	0	0
TDP021	XXXPMEPH	1-0-0-0-0-0-1-0-0-0-0-1-0-0-1-1-0-0-1-1-0-0-0-0-0-0-0-0-0-0-1-1-0-1-0-1-0-0-1-1-0-0-0-0-1-0-0-0-1-0-0-0			26.5	0	0		XXXPMEPH						XXXPMEPH					XXXPMEPH			XXXPMEPH	XXXPMEPH			XXXPMEPH	XXXPMEPH											XXXPMEPH	XXXPMEPH		XXXPMEPH		XXXPMEPH			XXXPMEPH	XXXPMEPH
TDP021	PHSKVNFQ	0-0-0-0-0-0-0-0-0-0-0-0-0-0-0-0-0-0-0-0-0-0-0-0-0-0-0-0-0-0-0-0-0-0-0-0-0-0-0-0-0-0-0-0-0-0-1-2-0-0-0-0			21.5	0	0
TDP021	HSKVNFQQ	0-0-0-0-0-0-0-0-0-0-0-0-0-0-0-0-0-0-0-0-0-0-0-0-0-0-0-0-0-0-0-0-0-0-0-0-0-0-0-0-0-0-0-1-0-0-1-1-0-0-1-1			24.6	0	0
TDP021	SKVNFQQH	0-0-0-0-1-0-0-0-0-1-0-0-1-0-0-0-1-0-0-0-0-0-0-0-0-0-0-0-0-0-0-0-0-0-0-0-0-0-0-0-0-0-1-1-0-0-1-1-0-1-1-1			22.6	0	0						SKVNFQQH					SKVNFQQH			SKVNFQQH				SKVNFQQH
TDP021	KVNFQQHI	1-1-1-1-1-1-1-1-0-0-1-1-1-0-1-1-1-0-1-1-1-0-0-0-0-0-1-0-0-0-0-0-1-0-0-0-0-1-0-1-1-1-1-0-1-1-1-1-1-1-1-0			27.2	0	0		KVNFQQHI	KVNFQQHI	KVNFQQHI	KVNFQQHI	KVNFQQHI	KVNFQQHI	KVNFQQHI	KVNFQQHI			KVNFQQHI	KVNFQQHI	KVNFQQHI		KVNFQQHI	KVNFQQHI	KVNFQQHI		KVNFQQHI	KVNFQQHI	KVNFQQHI						KVNFQQHI						KVNFQQHI					KVNFQQHI		KVNFQQHI	KVNFQQHI
TDP021	VNFQQHIX	0-0-0-0-0-0-0-0-0-0-0-0-0-0-0-0-0-0-0-0-0-0-0-0-0-0-0-0-0-0-0-0-0-0-0-0-0-0-0-0-0-0-0-0-1-1-1-1-1-0-1-1			26.7	0	0
TDP021	FQQHIXXX	0-0-0-0-0-0-0-0-0-0-0-0-0-0-0-0-0-0-0-0-0-0-0-0-0-0-0-0-0-0-0-0-0-0-0-0-0-0-0-0-0-0-0-0-0-0-1-0-0-0-0-0			23.4	0	0
TDP021	MEPHSKVN	0-0-0-0-0-1-0-1-0-0-0-1-0-0-1-1-1-0-0-1-0-0-0-0-0-0-1-0-0-0-0-0-0-0-0-0-0-1-0-1-1-1-1-0-1-1-1-0-1-1-1-0			21.7	0	0							MEPHSKVN		MEPHSKVN				MEPHSKVN			MEPHSKVN	MEPHSKVN	MEPHSKVN			MEPHSKVN							MEPHSKVN											MEPHSKVN		MEPHSKVN	MEPHSKVN
--------
TDP021	PMEPHSKVNFQQHI	1-1-1-1-1-1-1-1-1-1-1-1-1-1-1-1-1-1-1-1-1-1-1-1-1-1-1-1-1-1-1-1-1-1-1-1-1-1-1-1-1-1-1-0-1-1-1-0-1-1-1-0	3 times in 3 NECs		35.7	31.1	0
TDP021	PMEPHSKVNFQQH^i	0-0-0-0-0-0-0-0-0-0-0-0-0-0-0-0-0-0-0-0-0-0-0-0-0-0-0-0-0-0-0-0-0-0-0-0-0-0-0-0-0-0-0-0-0-0-1-0-0-0-0-0			23.4	0	0
TDP021	PMEPHSKVNF^qqhi	1-1-1-1-1-1-1-1-0-0-1-1-1-0-1-1-1-0-1-1-1-0-0-0-0-0-1-0-0-0-0-0-1-0-0-0-0-1-0-1-1-1-1-0-1-1-1-1-1-1-1-0			27.2	0	0
TDP021	p^MEPHSKVNFQQHI	1-0-0-0-0-0-1-0-0-0-0-1-0-0-1-1-0-0-1-1-0-0-0-0-0-0-0-0-0-0-1-1-0-1-0-1-0-0-1-1-0-0-0-0-1-0-0-0-1-0-0-0			26.5	0	0
TDP021	PMEPHSKVNFQ^qhi	0-0-0-0-0-0-0-0-0-0-0-0-0-0-0-0-0-0-0-0-0-0-0-0-0-0-0-0-0-0-0-0-0-0-0-0-0-0-0-0-0-0-0-0-1-1-1-1-1-0-1-1			26.7	0	0
TDP021	PMEPHSKV^nfqqhi	0-0-0-0-0-0-0-0-0-0-0-0-0-0-0-0-0-0-0-0-0-0-0-0-0-0-0-0-0-0-0-0-0-0-0-0-0-0-0-0-0-0-0-1-0-0-1-1-0-0-1-1			24.6	0	0
TDP021	PMEPHSKVN^fqqhi	0-0-0-0-1-0-0-0-0-1-0-0-1-0-0-0-1-0-0-0-0-0-0-0-0-0-0-0-0-0-0-0-0-0-0-0-0-0-0-0-0-0-1-1-0-0-1-1-0-1-1-1			22.6	0	0
TDP021	pm^EPHSKVNFQQHI	0-0-0-0-0-0-0-0-0-0-1-0-0-0-0-0-1-0-0-0-0-0-0-0-0-0-0-0-0-0-0-0-0-0-0-0-0-0-0-0-0-0-0-0-0-0-0-0-1-0-0-0			16.7	0	0
TDP021	pmeph^SKVNFQQHI	0-0-0-0-0-1-0-1-0-0-0-1-0-0-1-1-1-0-0-1-0-0-0-0-0-0-1-0-0-0-0-0-0-0-0-0-0-1-0-1-1-1-1-0-1-1-1-0-1-1-1-0			21.7	0	0
TDP021	pmephs^KVNFQQHI	0-0-0-0-0-0-0-0-0-0-0-0-0-0-0-0-0-0-0-0-0-0-0-0-0-0-0-0-0-0-0-0-0-0-0-0-0-0-0-0-0-0-0-0-0-0-1-0-0-0-0-0			18.3	0	0
TDP021	pmep^HSKVNFQQHI	0-0-0-0-0-0-0-0-0-0-0-0-0-0-0-0-0-0-0-0-0-0-0-0-0-0-0-0-0-0-0-0-0-0-0-0-0-0-0-0-0-0-0-0-0-0-0-0-0-1-1-0			16.1	0	0
TDP021	PMEPHSK^vnfqqhi	0-0-0-0-0-0-0-0-0-0-0-0-0-0-0-0-0-0-0-0-0-0-0-0-0-0-0-0-0-0-0-0-0-0-0-0-0-0-0-0-0-0-0-0-0-0-0-1-0-0-0-0			21.5	0	0
TDP021	pmephsk^VNFQQHI	0-0-0-0-0-0-0-0-0-0-0-0-0-0-0-0-0-0-0-0-0-0-0-0-0-0-0-0-0-0-0-0-0-0-0-0-0-0-0-0-0-0-0-0-0-0-1-1-0-0-0-0			17.2	0	0
TDP021	PMEPHS^kvnfqqhi	0-0-0-0-0-0-0-0-0-0-0-0-0-0-0-0-0-0-0-0-0-0-0-0-0-0-0-0-0-0-0-0-0-0-0-0-0-0-0-0-0-0-0-0-0-0-0-0-0-0-0-1			15.9	0	0
TDP022	XHMIALYW	0-0-0-0-0-0-0-0-0-0-0-0-0-0-0-0-0-0-0-0-0-0-0-0-0-0-0-0-0-0-0-0-0-0-0-0-0-0-0-0-0-0-0-0-0-1-0-0-0-0-0-0			15.2	0	0
TDP022	ALYWGRDT	0-0-0-0-0-0-0-0-0-0-0-0-0-0-0-0-0-0-0-0-0-0-0-0-0-0-0-0-0-0-0-0-0-0-0-0-0-0-0-0-0-0-0-0-0-0-0-0-1-1-0-0			15.8	0	0
TDP022	GRDTMFIX	0-0-0-1-1-0-0-0-0-2-0-0-0-1-0-0-0-0-0-0-0-0-0-0-0-0-0-0-0-0-0-0-0-0-0-0-0-0-0-0-0-0-0-0-0-0-0-0-0-0-0-0			17.4	0	0					GRDTMFIX	GRDTMFIX					GRDTMFIX				GRDTMFIX
TDP022	RDTMFIXX	0-0-0-1-2-0-1-0-1-1-0-1-1-2-0-0-0-0-0-0-0-0-0-0-0-0-0-0-0-0-0-0-0-0-0-0-0-0-0-0-2-2-0-0-2-2-2-1-2-3-0-0			26.6	0	0					RDTMFIXX	RDTMFIXX		RDTMFIXX		RDTMFIXX	RDTMFIXX		RDTMFIXX	RDTMFIXX	RDTMFIXX																											RDTMFIXX
TDP022	XXHMIALY	1-1-0-1-2-1-1-0-0-1-1-1-0-2-1-1-0-0-1-1-1-0-0-0-0-0-1-0-0-0-0-1-0-0-1-1-0-0-0-0-2-1-0-0-2-0-1-0-2-2-0-0	1 times in 3 NECs		25.7	24	0		XXHMIALY	XXHMIALY		XXHMIALY	XXHMIALY	XXHMIALY	XXHMIALY			XXHMIALY	XXHMIALY	XXHMIALY		XXHMIALY	XXHMIALY	XXHMIALY			XXHMIALY	XXHMIALY	XXHMIALY						XXHMIALY					XXHMIALY			XXHMIALY	XXHMIALY					XXHMIALY
TDP022	XXXHMIAL	0-0-0-0-0-0-0-0-0-0-0-0-0-0-0-0-0-0-0-0-0-0-0-0-0-0-0-0-0-0-0-0-0-0-0-0-0-0-0-0-0-0-0-0-0-1-0-0-0-0-0-0			20.2	0	0
TDP022	HMIALYWG	0-0-0-0-1-0-0-0-0-0-0-0-0-0-0-0-1-1-0-0-0-1-0-0-0-0-0-0-0-0-0-0-0-0-0-0-0-0-0-0-0-0-0-0-1-1-0-0-1-1-0-0			18.9	0	0						HMIALYWG												HMIALYWG	HMIALYWG				HMIALYWG
TDP022	IALYWGRD	0-0-0-0-0-0-0-0-0-0-0-0-0-0-0-0-1-0-0-0-0-0-0-0-0-0-0-0-0-0-0-0-0-0-0-0-0-0-0-0-0-1-0-0-0-1-0-0-1-1-0-0			16.5	0	0																		IALYWGRD
TDP022	MIALYWGR	0-0-1-1-0-0-0-0-0-0-0-0-0-1-0-0-0-1-0-0-0-0-0-0-0-0-0-0-0-0-0-0-0-0-0-0-0-0-0-0-0-0-0-0-0-0-1-0-0-0-0-0			21.5	0	0				MIALYWGR	MIALYWGR										MIALYWGR				MIALYWGR
--------
TDP022	hm^IALYWGRDTMFI	1-1-0-0-0-1-1-0-0-0-1-1-0-0-1-1-0-0-1-1-1-0-0-0-0-0-1-0-0-0-0-1-0-0-1-1-0-0-0-0-1-0-0-0-1-0-0-0-1-1-0-0	1 times in 3 NECs		25.7	24	0
TDP022	HMIALYWGRDTM^fi	0-0-0-1-0-0-1-0-1-1-0-1-1-1-0-0-0-0-0-0-0-0-0-0-0-0-0-0-0-0-0-0-0-0-0-0-0-0-0-0-1-1-0-0-1-1-1-1-1-1-0-0			26.6	0	0
TDP022	h^MIALYWGRDTM^fi	0-0-0-0-0-0-0-0-0-0-0-0-0-0-0-0-0-0-0-0-0-0-0-0-0-0-0-0-0-0-0-0-0-0-0-0-0-0-0-0-0-0-0-0-0-1-0-0-0-0-0-0			20.2	0	0
TDP022	HMIALYWGRDTMFI	0-0-0-0-0-0-0-0-0-0-0-0-0-0-0-0-0-0-0-0-0-0-0-0-0-0-0-0-0-0-0-0-0-0-0-0-0-0-0-0-0-0-0-0-0-1-0-0-1-0-0-0			17.2	0	0
TDP022	hm^IALYWGRDTM^fi	0-0-0-0-1-0-0-0-0-0-0-0-0-1-0-0-0-0-0-0-0-0-0-0-0-0-0-0-0-0-0-0-0-0-0-0-0-0-0-0-1-1-0-0-1-0-1-0-1-1-0-0			23.3	0	0
TDP022	HMIALYWGRDT^mfi	0-0-0-0-0-0-0-0-0-1-0-0-0-0-0-0-0-0-0-0-0-0-0-0-0-0-0-0-0-0-0-0-0-0-0-0-0-0-0-0-0-0-0-0-0-0-0-0-0-0-0-0			17.4	0	0
TDP022	hmialy^WGRDTMFI	0-0-0-0-0-0-0-0-0-0-0-0-0-0-0-0-1-0-0-0-0-0-0-0-0-0-0-0-0-0-0-0-0-0-0-0-0-0-0-0-0-1-0-0-0-1-0-0-1-1-0-0			16.5	0	0
TDP022	hmi^ALYWGRDTMFI	0-0-0-0-0-0-0-0-0-0-0-0-0-0-0-0-0-0-0-0-0-0-0-0-0-0-0-0-0-0-0-0-0-0-0-0-0-0-0-0-0-0-0-0-0-1-0-0-0-0-0-0			15.2	0	0
TDP022	hmia^LYWGRDTMFI	0-0-0-0-0-0-0-0-0-0-0-0-0-0-0-0-1-1-0-0-0-1-0-0-0-0-0-0-0-0-0-0-0-0-0-0-0-0-0-0-0-0-0-0-1-1-0-0-1-0-0-0			18.9	0	0
TDP022	hmial^YWGRDTMFI	0-0-1-1-0-0-0-0-0-0-0-0-0-1-0-0-0-1-0-0-0-0-0-0-0-0-0-0-0-0-0-0-0-0-0-0-0-0-0-0-0-0-0-0-0-0-1-0-0-0-0-0			21.5	0	0
TDP022	HMIALYW^grdtmfi	0-0-0-0-0-0-0-0-0-0-0-0-0-0-0-0-0-0-0-0-0-0-0-0-0-0-0-0-0-0-0-0-0-0-0-0-0-0-0-0-0-0-0-0-0-0-0-0-1-1-0-0			15.8	0	0
TDP022	hm^IALYWGRDT^mfi	0-0-0-1-1-0-0-0-0-1-0-0-0-1-0-0-0-0-0-0-0-0-0-0-0-0-0-0-0-0-0-0-0-0-0-0-0-0-0-0-0-0-0-0-0-0-0-0-0-0-0-0			16.4	0	0
TDP022	hmia^LYWGRDTM^fi	0-0-0-0-1-0-0-0-0-0-0-0-0-0-0-0-0-0-0-0-0-0-0-0-0-0-0-0-0-0-0-0-0-0-0-0-0-0-0-0-0-0-0-0-0-0-0-0-0-1-0-0			15.8	0	0
--------
TDP023	MGNNGSLEQDVWIA	0-0-0-0-0-0-0-0-0-0-0-0-0-0-0-0-0-0-0-0-0-0-1-0-0-0-0-0-0-0-1-0-0-0-0-0-0-0-0-0-0-1-0-0-0-0-0-0-0-0-0-0			15.2	0	0
TDP024	LGWHAMFR	0-0-0-0-0-0-0-0-0-0-0-0-0-0-0-0-0-0-0-0-0-0-0-0-0-0-0-0-0-0-0-0-0-0-0-0-0-0-0-0-0-0-0-0-1-0-1-0-1-1-0-0			16.8	0	0
TDP024	WHAMFRKY	0-1-0-0-0-0-0-0-0-0-0-0-0-0-0-0-1-1-0-0-0-0-0-0-0-0-0-0-0-0-0-0-0-0-0-0-0-0-0-0-0-1-0-0-0-1-0-0-1-0-0-0			15.5	0	0			WHAMFRKY															WHAMFRKY	WHAMFRKY
TDP024	YPIMAXXX	0-0-0-0-0-0-0-0-0-0-0-0-0-1-0-0-0-1-0-0-0-0-0-0-0-0-0-0-0-0-0-0-0-0-0-0-0-0-0-0-0-0-0-0-0-0-0-0-1-0-0-0			16.9	0	0															YPIMAXXX				YPIMAXXX
TDP024	XXXLGWHA	0-0-0-0-0-0-0-0-0-0-0-0-0-0-0-0-0-0-0-0-0-0-0-0-0-0-0-0-0-0-0-0-0-0-0-0-0-0-0-0-1-0-0-0-0-0-0-0-0-1-0-0			19.4	0	0																																										XXXLGWHA
TDP024	AMFRKYPI	0-1-0-1-0-0-1-0-0-0-1-1-1-0-1-0-1-0-1-1-1-1-1-1-1-1-1-1-1-1-0-0-0-0-0-0-0-0-0-1-2-1-1-0-1-1-1-0-1-2-1-1			35.1	0	0			AMFRKYPI		AMFRKYPI			AMFRKYPI				AMFRKYPI	AMFRKYPI	AMFRKYPI		AMFRKYPI		AMFRKYPI		AMFRKYPI	AMFRKYPI	AMFRKYPI	AMFRKYPI	AMFRKYPI	AMFRKYPI	AMFRKYPI	AMFRKYPI	AMFRKYPI	AMFRKYPI	AMFRKYPI	AMFRKYPI										AMFRKYPI	AMFRKYPI
TDP024	XLGWHAMF	0-0-0-0-0-0-0-0-0-0-0-0-0-0-0-0-0-0-0-0-0-0-0-0-0-0-0-0-0-0-0-0-0-0-0-0-0-0-0-0-1-0-0-0-1-1-1-0-1-1-0-0			27	0	0																																										XLGWHAMF
TDP024	KYPIMAXX	0-0-0-0-0-0-0-0-0-0-0-0-1-0-0-0-0-1-0-0-0-0-0-0-0-0-0-0-0-0-0-0-0-0-0-0-0-0-0-1-1-0-0-0-1-2-2-0-1-2-1-0			23.5	0	0														KYPIMAXX					KYPIMAXX																						KYPIMAXX	KYPIMAXX
TDP024	GWHAMFRK	0-0-0-0-1-0-0-0-0-0-0-0-0-1-0-0-0-0-0-0-0-0-0-0-0-0-0-0-0-0-0-0-0-0-0-0-0-0-0-0-1-1-0-0-1-2-3-0-2-2-2-0			20.8	0	0						GWHAMFRK									GWHAMFRK																											GWHAMFRK
TDP024	RKYPIMAX	0-0-0-0-0-0-0-0-0-0-0-0-0-1-0-0-0-0-0-0-0-0-0-0-0-0-0-0-0-1-0-0-0-0-0-0-0-0-0-0-0-0-0-0-0-0-1-0-0-0-0-0			18.4	0	0															RKYPIMAX																RKYPIMAX
TDP024	HAMFRKYP	0-0-0-0-1-0-0-0-0-0-0-0-0-0-0-0-0-0-0-0-0-0-0-0-0-0-0-0-0-0-0-0-0-0-0-0-0-0-0-0-1-0-1-0-1-1-0-0-1-2-0-0			20	0	0						HAMFRKYP																																				HAMFRKYP
TDP024	MFRKYPIM	0-0-0-0-0-0-0-0-0-0-0-0-0-0-0-0-0-0-0-0-0-0-0-0-0-0-0-0-0-0-0-0-0-0-0-0-0-0-0-0-1-0-0-0-1-1-0-0-1-0-0-0			24.5	0	0																																										MFRKYPIM
--------
TDP024	LGWHAMFRKYPIMA	1-1-1-0-0-1-0-1-1-1-1-1-0-0-1-1-0-0-1-1-1-0-0-1-0-0-1-1-1-0-0-1-0-1-0-1-0-0-0-1-1-0-0-0-0-0-0-0-1-0-0-0	2 times in 3 NECs		31.9	26.9	0
TDP024	LGWHAMFR^kypima	0-1-0-1-0-0-1-0-0-0-1-1-1-0-1-0-1-0-1-1-1-1-1-1-1-1-1-1-1-1-0-0-0-0-0-0-0-0-0-1-1-1-1-0-1-1-1-0-1-1-1-1			35.1	0	0
TDP024	lgw^HAMFRKYPIMA	0-0-0-0-0-0-0-0-0-0-0-0-0-0-0-0-0-0-0-0-0-0-0-0-0-0-0-0-0-0-0-0-0-0-0-0-0-0-0-0-1-0-0-0-1-1-0-0-1-1-0-0			27	0	0
TDP024	LGWHAMFRK^ypima	0-0-0-0-0-0-0-0-0-0-0-0-0-0-0-0-0-0-0-0-0-0-0-0-0-0-0-0-0-0-0-0-0-0-0-0-0-0-0-0-1-0-0-0-1-1-0-0-1-0-0-0			24.5	0	0
TDP024	LGWHAMFRKYPI^ma	0-0-0-0-0-0-0-0-0-0-0-0-1-0-0-0-0-1-0-0-0-0-0-0-0-0-0-0-0-0-0-0-0-0-0-0-0-0-0-1-1-0-0-0-1-1-0-0-1-1-0-0			23.5	0	0
TDP024	LGWHAMF^rkypima	0-0-0-0-1-0-0-0-0-0-0-0-0-0-0-0-0-0-0-0-0-0-0-0-0-0-0-0-0-0-0-0-0-0-0-0-0-0-0-0-1-0-0-0-1-1-0-0-1-1-0-0			20	0	0
TDP024	LGWHAMFRKYP^ima	0-0-0-0-0-0-0-0-0-0-0-0-0-1-0-0-0-0-0-0-0-0-0-0-0-0-0-0-0-1-0-0-0-0-0-0-0-0-0-0-0-0-0-0-0-0-0-0-0-0-0-0			17.2	0	0
TDP024	l^GWHAMFR^kypima	0-0-0-0-0-0-0-0-0-0-0-0-0-0-0-0-0-0-0-0-0-0-0-0-0-0-0-0-0-0-0-0-0-0-0-0-0-0-0-0-1-0-0-0-0-0-0-0-0-1-0-0			19.4	0	0
TDP024	lgw^HAMFRKYPI^ma	0-0-0-0-0-0-0-0-0-0-0-0-0-0-0-0-0-0-0-0-0-0-0-0-0-0-0-0-0-0-0-0-0-0-0-0-0-0-0-0-0-0-0-0-0-0-1-0-0-0-0-0			15	0	0
TDP024	lgwha^MFRKYPIM^a	0-0-0-0-0-0-0-0-0-0-0-0-0-1-0-0-0-0-0-0-0-0-0-0-0-0-0-0-0-0-0-0-0-0-0-0-0-0-0-0-0-0-0-0-0-0-0-0-1-0-0-0			16.9	0	0
TDP024	lgwha^MFRKYPI^ma	0-0-0-0-0-0-0-0-0-0-0-0-0-0-0-0-0-0-0-0-0-0-0-0-0-0-0-0-0-0-0-0-0-0-0-0-0-0-0-0-0-0-0-0-0-1-1-0-0-1-1-0			20.8	0	0
TDP024	lgwha^MFRKYP^ima	0-0-0-0-0-0-0-0-0-0-0-0-0-0-0-0-0-0-0-0-0-0-0-0-0-0-0-0-0-0-0-0-0-0-0-0-0-0-0-0-0-0-0-0-0-0-1-0-0-0-0-0			18.4	0	0
TDP024	lgwh^AMFRKYPIMA	0-0-0-0-0-0-0-0-0-0-0-0-0-0-0-0-0-0-0-0-0-0-0-0-0-0-0-0-0-0-0-0-0-0-0-0-0-0-0-0-0-0-0-0-1-0-1-0-1-1-0-0			16.8	0	0
TDP024	lgwhamf^RKYPIMA	0-0-0-0-0-0-0-0-0-0-0-0-0-0-0-0-0-0-0-0-0-0-0-0-0-0-0-0-0-0-0-0-0-0-0-0-0-0-0-0-0-0-1-0-0-0-0-0-0-1-0-0			16.2	0	0
TDP024	lgwha^MFRKYPIMA	0-0-0-0-1-0-0-0-0-0-0-0-0-0-0-0-0-0-0-0-0-0-0-0-0-0-0-0-0-0-0-0-0-0-0-0-0-0-0-0-1-1-0-0-1-1-1-0-1-1-1-0			19.5	0	0
TDP024	lgwham^FRKYPIMA	0-1-0-0-0-0-0-0-0-0-0-0-0-0-0-0-1-0-0-0-0-0-0-0-0-0-0-0-0-0-0-0-0-0-0-0-0-0-0-0-0-1-0-0-0-1-0-0-1-0-0-0			15.5	0	0
TDP024	lgwham^FRKYPIM^a	0-0-0-0-0-0-0-0-0-0-0-0-0-0-0-0-0-1-0-0-0-0-0-0-0-0-0-0-0-0-0-0-0-0-0-0-0-0-0-0-0-0-0-0-0-0-0-0-0-0-0-0			15.1	0	0
TDP025	XXXSGPDY	0-0-1-0-1-0-0-0-0-0-0-0-0-0-0-0-0-0-0-0-0-0-0-0-0-0-0-0-0-0-0-0-0-0-0-0-0-0-0-0-0-0-0-1-0-0-2-2-0-0-0-0			28.5	0	0				XXXSGPDY		XXXSGPDY
TDP025	KERLFFWA	1-1-2-2-2-0-0-1-0-1-0-1-1-1-0-0-0-1-0-0-0-0-0-0-0-0-0-0-0-0-0-0-0-0-1-0-0-0-0-1-1-1-1-2-1-1-1-2-1-1-1-1			37.9	0	0		KERLFFWA	KERLFFWA	KERLFFWA	KERLFFWA	KERLFFWA			KERLFFWA		KERLFFWA		KERLFFWA	KERLFFWA	KERLFFWA				KERLFFWA																	KERLFFWA					KERLFFWA	KERLFFWA
TDP025	ERLFFWAX	0-1-1-1-1-0-0-0-0-1-0-1-1-1-0-0-0-0-0-0-0-0-0-0-0-0-0-0-0-0-0-0-0-0-0-0-0-0-0-1-1-1-1-1-1-1-2-2-1-1-1-1			40.1	0	0			ERLFFWAX	ERLFFWAX	ERLFFWAX	ERLFFWAX					ERLFFWAX		ERLFFWAX	ERLFFWAX	ERLFFWAX																										ERLFFWAX	ERLFFWAX
TDP025	RLFFWAXX	1-1-1-1-1-1-1-1-1-1-1-1-1-1-0-0-0-1-0-0-0-0-0-0-0-0-0-0-0-0-0-0-0-0-0-0-0-0-0-1-1-1-1-0-1-1-2-1-1-1-1-1			42.6	0	0		RLFFWAXX	RLFFWAXX	RLFFWAXX	RLFFWAXX	RLFFWAXX	RLFFWAXX	RLFFWAXX	RLFFWAXX	RLFFWAXX	RLFFWAXX	RLFFWAXX	RLFFWAXX	RLFFWAXX	RLFFWAXX				RLFFWAXX																						RLFFWAXX	RLFFWAXX
TDP025	XXSGPDYQ	0-0-0-1-0-0-0-0-0-0-0-0-0-0-0-0-0-0-0-0-0-0-0-0-0-0-0-0-0-0-0-0-0-0-0-0-0-0-0-0-0-0-0-0-0-0-0-0-0-0-0-0			17.5	0	0					XXSGPDYQ
TDP025	YQKERLFF	0-0-0-0-0-0-0-0-0-0-0-0-0-0-0-0-0-0-0-0-0-0-0-0-0-0-0-0-0-0-0-0-0-0-0-0-0-0-0-0-0-0-0-1-0-0-0-1-0-0-0-0			15.5	0	0
TDP025	QKERLFFW	0-0-0-0-0-0-0-0-0-0-0-0-0-0-0-0-0-0-0-0-0-0-0-0-0-0-0-0-0-0-0-0-0-0-0-0-0-0-0-0-0-0-1-1-0-0-0-1-0-0-1-1			38.6	0	0
TDP025	LFFWAXXX	0-0-0-0-0-0-1-1-1-1-0-1-1-0-0-0-0-0-0-0-0-0-0-0-0-0-0-0-0-0-0-0-0-0-0-0-0-0-0-0-0-0-0-0-0-0-0-0-0-0-0-0			20.7	0	0								LFFWAXXX	LFFWAXXX	LFFWAXXX	LFFWAXXX		LFFWAXXX	LFFWAXXX
TDP025	SGPDYQKE	0-0-0-0-0-0-0-0-0-0-0-0-0-0-0-0-0-0-0-0-0-0-0-0-0-0-0-0-0-0-0-0-0-0-0-0-0-0-0-0-0-0-0-0-0-0-0-0-1-0-0-0			17.9	0	0
--------
TDP025	SGPDYQKERLF^fwa	0-1-1-1-1-0-0-0-0-1-0-1-1-1-0-0-0-0-0-0-0-0-0-0-0-0-0-0-0-0-0-0-0-0-0-0-0-0-0-1-1-1-1-1-1-1-1-1-1-1-1-1			40.1	0	0
TDP025	SGPDYQKERLFF^wa	1-1-1-1-1-1-1-1-1-1-1-1-1-1-0-0-0-1-0-0-0-0-0-0-0-0-0-0-0-0-0-0-0-0-0-0-0-0-0-1-1-1-1-0-1-1-1-1-1-1-1-1			42.6	0	0
TDP025	SGPDYQKER^lffwa	0-0-0-0-0-0-0-0-0-0-0-0-0-0-0-0-0-0-0-0-0-0-0-0-0-0-0-0-0-0-0-0-0-0-0-0-0-0-0-0-0-0-1-1-0-0-0-1-0-0-1-1			38.6	0	0
TDP025	SGPDYQKERLFFWA	1-0-1-0-0-0-1-1-0-0-0-1-1-0-0-0-0-1-1-0-1-1-0-0-0-0-1-0-1-0-1-1-0-0-0-1-1-1-1-0-0-1-0-0-0-0-0-0-1-1-1-0	1 times in 3 NECs		34.9	31.4	0
TDP025	SGPDYQKERL^ffwa	1-1-1-1-1-0-0-1-0-1-0-1-1-1-0-0-0-1-0-0-0-0-0-0-0-0-0-0-0-0-0-0-0-0-1-0-0-0-0-1-1-1-1-1-1-1-1-1-1-1-1-1			37.9	0	0
TDP025	s^GPDYQKERLF^fwa	0-0-0-0-0-0-0-0-0-0-0-0-0-0-0-0-0-0-0-0-0-0-0-0-0-0-0-0-0-0-0-0-0-0-0-0-0-0-0-0-0-0-0-0-0-0-1-1-0-0-0-0			28.5	0	0
TDP025	s^GPDYQKERL^ffwa	0-0-1-0-1-0-0-0-0-0-0-0-0-0-0-0-0-0-0-0-0-0-0-0-0-0-0-0-0-0-0-0-0-0-0-0-0-0-0-0-0-0-0-1-0-0-0-1-0-0-0-0			23.6	0	0
TDP025	s^GPDYQKERLFF^wa	0-0-0-0-0-0-0-0-0-0-0-0-0-0-0-0-0-0-0-0-0-0-0-0-0-0-0-0-0-0-0-0-0-0-0-0-0-0-0-0-0-0-0-0-0-0-1-0-0-0-0-0			18.3	0	0
TDP025	SGPDYQKERLFFW^a	0-0-0-0-0-0-1-1-1-1-0-1-1-0-0-0-0-0-0-0-0-0-0-0-0-0-0-0-0-0-0-0-0-0-0-0-0-0-0-0-0-0-0-0-0-0-0-0-0-0-0-0			20.7	0	0
TDP025	SGPDYQKE^rlffwa	0-0-0-0-0-0-0-0-0-0-0-0-0-0-0-0-0-0-0-0-0-0-0-0-0-0-0-0-0-0-0-0-0-0-0-0-0-0-0-0-0-0-0-1-0-0-0-1-0-0-0-0			15.5	0	0
TDP025	sg^PDYQKERL^ffwa	0-0-0-1-0-0-0-0-0-0-0-0-0-0-0-0-0-0-0-0-0-0-0-0-0-0-0-0-0-0-0-0-0-0-0-0-0-0-0-0-0-0-0-0-0-0-0-0-0-0-0-0			17.5	0	0
TDP025	sgpd^YQKERLFFWA	0-0-0-0-0-0-0-0-0-0-0-0-0-0-0-0-0-0-0-0-0-0-0-0-0-0-0-0-0-0-0-0-0-0-0-0-0-0-0-0-0-0-0-0-0-0-0-0-1-0-0-0			17.9	0	0
TDP026	GSMGANHT	0-0-0-0-0-0-0-0-0-0-0-0-0-0-0-0-0-0-0-0-0-0-0-0-0-0-0-0-0-0-0-0-0-0-0-0-0-0-0-0-0-0-0-0-0-0-1-0-1-1-1-0			19.9	0	0
TDP026	GANHTWVV	1-0-1-1-0-0-1-0-1-0-0-1-0-0-0-0-1-0-0-0-0-0-0-0-0-0-0-0-0-0-0-0-0-0-0-1-0-0-0-1-1-1-1-0-0-0-1-1-0-0-0-1	2 times in 3 NECs		28.2	16.2	0		GANHTWVV		GANHTWVV	GANHTWVV			GANHTWVV		GANHTWVV			GANHTWVV					GANHTWVV																			GANHTWVV				GANHTWVV	GANHTWVV
TDP026	ANHTWVVK	0-0-0-0-1-0-0-0-0-0-0-0-0-0-0-0-0-0-0-0-0-0-0-0-0-0-0-0-0-0-0-0-0-0-0-0-0-0-0-0-0-1-1-0-0-0-1-1-0-0-1-0			25.7	0	0						ANHTWVVK
TDP026	NHTWVVKA	1-1-1-0-1-0-0-0-0-0-1-0-0-0-1-0-0-0-0-1-0-0-0-0-0-0-0-0-0-1-0-0-0-0-0-0-0-0-0-1-1-1-2-0-1-1-2-1-1-1-1-1			30.9	0	0		NHTWVVKA	NHTWVVKA	NHTWVVKA		NHTWVVKA						NHTWVVKA				NHTWVVKA					NHTWVVKA										NHTWVVKA										NHTWVVKA	NHTWVVKA
TDP026	TWVVKAXX	0-0-0-0-0-0-0-0-0-0-0-0-1-1-0-0-0-0-0-0-0-0-0-0-0-0-0-0-0-0-0-0-0-0-0-0-0-0-0-0-0-1-0-0-0-1-1-0-1-0-1-0			19.2	0	0														TWVVKAXX	TWVVKAXX
TDP026	WVVKAXXX	0-0-0-1-1-0-1-0-1-1-1-1-1-1-0-0-0-0-0-0-0-0-0-0-0-0-0-0-0-0-0-0-0-0-1-0-0-0-0-1-0-1-0-0-0-0-1-0-0-0-0-0			40.2	0	0					WVVKAXXX	WVVKAXXX		WVVKAXXX		WVVKAXXX	WVVKAXXX	WVVKAXXX	WVVKAXXX	WVVKAXXX	WVVKAXXX																					WVVKAXXX					WVVKAXXX
TDP026	FGSMGANH	0-0-0-0-0-0-0-0-0-0-0-0-0-0-0-0-0-0-0-0-0-0-0-0-0-0-0-0-0-0-0-0-0-0-0-0-0-0-0-0-0-0-0-0-0-0-0-0-0-0-1-0			18.1	0	0
TDP026	XXXFGSMG	0-0-0-0-0-0-0-0-0-0-0-0-0-0-0-0-0-0-0-0-0-0-0-0-0-0-0-0-0-0-0-0-0-0-0-0-0-0-0-0-0-0-1-0-0-0-1-0-0-0-0-0			16	0	0
TDP026	MGANHTWV	0-0-0-1-1-0-0-0-1-1-0-0-1-1-0-0-1-1-0-0-0-0-0-0-0-0-0-0-0-0-0-0-0-0-0-0-0-0-0-0-0-1-1-0-0-0-1-1-0-0-1-0			21.3	0	0					MGANHTWV	MGANHTWV				MGANHTWV	MGANHTWV			MGANHTWV	MGANHTWV			MGANHTWV	MGANHTWV
TDP026	SMGANHTW	0-0-0-0-0-0-0-0-0-0-0-0-0-0-0-0-0-0-0-0-0-0-0-0-0-0-0-0-0-0-0-0-0-0-0-0-0-0-0-0-0-1-1-0-0-0-1-0-0-0-0-0			20.3	0	0
TDP026	XXFGSMGA	0-0-0-0-0-0-0-0-0-0-1-0-0-0-0-0-0-0-0-0-0-0-0-0-0-0-0-0-0-0-0-0-0-0-0-0-0-0-0-1-0-0-0-0-0-0-1-0-1-1-0-0			20.3	0	0												XXFGSMGA																													XXFGSMGA
--------
TDP026	FGSMGANHTWVVK^a	0-0-0-1-1-0-1-0-1-1-1-1-1-1-0-0-0-0-0-0-0-0-0-0-0-0-0-0-0-0-0-0-0-0-1-0-0-0-0-1-0-1-0-0-0-0-1-0-0-0-0-0			40.2	0	0
TDP026	FGSMGANHTWVVKA	1-1-1-1-1-1-1-1-1-1-1-1-1-1-1-1-1-1-1-1-1-1-1-1-0-0-1-1-1-1-1-1-1-1-1-1-1-1-1-1-1-1-1-0-1-1-1-0-1-1-1-0	3 times in 3 NECs		35	24.3	0
TDP026	FGSMGANH^twvvka	1-0-1-1-0-0-1-0-1-0-0-1-0-0-0-0-1-0-0-0-0-0-0-0-0-0-0-0-0-0-0-0-0-0-0-1-0-0-0-1-1-1-1-0-0-0-1-1-0-0-0-1	2 times in 3 NECs		28.2	16.2	0
TDP026	FGSMGANHTW^vvka	1-1-1-0-1-0-0-0-0-0-1-0-0-0-1-0-0-0-0-1-0-0-0-0-0-0-0-0-0-1-0-0-0-0-0-0-0-0-0-1-1-1-1-0-1-1-1-1-1-1-1-1			30.9	0	0
TDP026	FGSMGANHT^wvvka	0-0-0-0-1-0-0-0-0-0-0-0-0-0-0-0-0-0-0-0-0-0-0-0-0-0-0-0-0-0-0-0-0-0-0-0-0-0-0-0-0-1-1-0-0-0-1-1-0-0-1-0			25.7	0	0
TDP026	fg^SMGANHTWVVKA	0-0-0-0-0-0-0-0-0-0-1-0-0-0-0-0-0-0-0-0-0-0-0-0-0-0-0-0-0-0-0-0-0-0-0-0-0-0-0-1-0-0-0-0-0-0-1-0-1-1-0-0			20.3	0	0
TDP026	f^GSMGANHTW^vvka	0-0-0-0-0-0-0-0-0-0-0-0-0-0-0-0-0-0-0-0-0-0-0-0-0-0-0-0-0-0-0-0-0-0-0-0-0-0-0-0-0-0-1-0-0-0-1-0-0-0-0-0			16	0	0
TDP026	fgsmga^NHTWVVKA	0-0-0-0-0-0-0-0-0-0-0-0-0-0-0-0-0-0-0-0-0-0-0-0-0-0-0-0-0-0-0-0-0-0-0-0-0-0-0-0-0-1-1-0-0-0-1-0-0-0-0-0			20.3	0	0
TDP026	fgsmg^ANHTWVVKA	0-0-0-0-0-0-0-0-0-0-0-0-0-0-0-0-0-0-0-0-0-0-0-0-0-0-0-0-0-0-0-0-0-0-0-0-0-0-0-0-0-0-0-0-0-0-1-0-1-1-1-0			19.9	0	0
TDP026	fgsmgan^HTWVVKA	0-0-0-1-1-0-0-0-1-1-0-0-1-1-0-0-1-1-0-0-0-0-0-0-0-0-0-0-0-0-0-0-0-0-0-0-0-0-0-0-0-1-1-0-0-0-1-1-0-0-1-0			21.3	0	0
TDP026	FGSMGANHTWVV^ka	0-0-0-0-0-0-0-0-0-0-0-0-1-1-0-0-0-0-0-0-0-0-0-0-0-0-0-0-0-0-0-0-0-0-0-0-0-0-0-0-0-1-0-0-0-1-1-0-1-0-1-0			19.2	0	0
TDP026	fgsm^GANHTWVVKA	0-0-0-0-0-0-0-0-0-0-0-0-0-0-0-0-0-0-0-0-0-0-0-0-0-0-0-0-0-0-0-0-0-0-0-0-0-0-0-0-0-0-0-0-0-0-0-0-0-0-1-0			18.1	0	0
TDP027	YRMHVQLG	0-0-0-0-0-0-0-0-0-0-0-0-0-1-0-0-0-1-0-0-0-0-0-0-0-0-0-0-0-0-0-0-0-0-0-0-0-0-0-0-0-1-1-0-0-1-1-1-0-1-1-1			33.3	0	0															YRMHVQLG				YRMHVQLG
TDP027	RMHVQLGG	0-0-0-0-0-0-0-0-0-0-0-0-0-0-0-0-0-0-0-0-0-0-0-0-0-0-0-0-0-0-0-0-0-0-0-0-0-0-0-0-0-0-0-0-0-0-1-0-0-0-0-0			15.4	0	0
TDP027	MHVQLGGA	0-0-0-0-0-0-0-0-0-0-0-0-0-0-0-0-0-0-0-0-0-0-0-0-0-0-0-0-0-0-0-0-0-0-0-0-0-0-0-0-0-0-0-0-0-0-1-1-0-0-1-0			21.8	0	0
TDP027	VQLGGAAX	0-1-1-0-1-0-1-0-0-1-0-0-1-2-0-0-0-0-1-0-0-0-0-0-0-0-0-0-0-0-0-0-0-0-0-0-0-0-0-1-0-0-0-0-0-0-1-1-1-0-0-0	1 times in 3 NECs		22.8	15.5	0			VQLGGAAX	VQLGGAAX		VQLGGAAX		VQLGGAAX			VQLGGAAX			VQLGGAAX	VQLGGAAX					VQLGGAAX																					VQLGGAAX
TDP027	QLGGAAXX	0-0-0-1-1-0-0-0-0-1-0-0-0-1-0-0-0-0-0-0-0-0-0-0-0-0-0-0-0-0-0-0-0-0-0-0-0-0-0-0-0-0-0-0-0-0-0-0-0-0-0-0			21.9	0	0					QLGGAAXX	QLGGAAXX					QLGGAAXX				QLGGAAXX
TDP027	LGGAAXXX	0-0-0-1-1-0-1-0-1-1-0-0-2-0-0-0-0-0-0-0-0-0-0-0-0-0-0-0-0-0-0-0-0-0-0-0-0-0-0-0-0-1-0-0-0-0-0-0-0-1-0-0			24.9	0	0					LGGAAXXX	LGGAAXXX		LGGAAXXX		LGGAAXXX	LGGAAXXX			LGGAAXXX
TDP027	XXXDGIYR	1-1-1-1-1-1-1-1-1-1-0-1-2-2-1-1-1-1-1-1-1-1-1-1-1-1-1-1-1-1-1-1-1-1-1-1-1-1-1-1-1-0-0-0-1-1-1-0-1-1-0-0	3 times in 3 NECs		31.8	26.8	0		XXXDGIYR	XXXDGIYR	XXXDGIYR	XXXDGIYR	XXXDGIYR	XXXDGIYR	XXXDGIYR	XXXDGIYR	XXXDGIYR	XXXDGIYR		XXXDGIYR	XXXDGIYR	XXXDGIYR	XXXDGIYR	XXXDGIYR	XXXDGIYR	XXXDGIYR	XXXDGIYR	XXXDGIYR	XXXDGIYR	XXXDGIYR	XXXDGIYR	XXXDGIYR	XXXDGIYR	XXXDGIYR	XXXDGIYR	XXXDGIYR	XXXDGIYR	XXXDGIYR	XXXDGIYR	XXXDGIYR	XXXDGIYR	XXXDGIYR	XXXDGIYR	XXXDGIYR	XXXDGIYR	XXXDGIYR	XXXDGIYR	XXXDGIYR	XXXDGIYR
TDP027	IYRMHVQL	0-0-0-0-1-0-0-0-0-0-0-0-1-1-0-0-1-1-0-0-0-0-0-0-0-0-0-0-0-0-0-0-0-0-0-0-0-0-0-0-0-0-1-1-0-0-1-1-0-0-1-1			18.8	0	0						IYRMHVQL								IYRMHVQL	IYRMHVQL			IYRMHVQL	IYRMHVQL
TDP027	XXDGIYRM	1-1-1-1-1-0-1-1-1-1-1-1-1-0-1-1-0-1-0-0-0-0-0-0-0-0-0-0-0-0-1-1-1-1-1-1-0-1-1-1-0-0-0-0-1-1-0-0-1-0-0-0	2 times in 3 NECs		23.4	20.8	0		XXDGIYRM	XXDGIYRM	XXDGIYRM	XXDGIYRM	XXDGIYRM		XXDGIYRM	XXDGIYRM	XXDGIYRM	XXDGIYRM	XXDGIYRM	XXDGIYRM	XXDGIYRM		XXDGIYRM	XXDGIYRM		XXDGIYRM													XXDGIYRM	XXDGIYRM	XXDGIYRM	XXDGIYRM	XXDGIYRM	XXDGIYRM		XXDGIYRM	XXDGIYRM	XXDGIYRM
TDP027	GIYRMHVQ	0-0-0-0-0-0-0-0-0-0-0-0-0-0-0-0-0-0-0-0-0-0-0-0-0-0-0-0-0-0-0-0-0-0-0-0-0-0-0-0-0-1-1-0-0-0-1-0-0-0-0-0			19	0	0
TDP027	DGIYRMHV	0-0-0-0-0-0-0-0-0-0-0-0-0-0-0-0-0-0-0-0-0-0-0-0-0-0-0-0-0-0-0-0-0-0-0-0-0-0-0-0-0-1-1-0-0-0-1-1-0-1-2-1			34.2	0	0
TDP027	HVQLGGAA	0-0-0-0-0-0-0-0-0-0-0-0-0-0-0-0-0-0-0-0-0-0-0-0-0-0-0-0-0-0-0-0-0-0-0-0-0-0-0-0-0-0-0-0-0-0-0-0-0-0-1-0			15.2	0	0
--------
TDP027	DGIYRMH^vqlggaa	0-0-0-0-0-0-0-0-0-0-0-0-0-1-0-0-0-1-0-0-0-0-0-0-0-0-0-0-0-0-0-0-0-0-0-0-0-0-0-0-0-1-1-0-0-1-1-1-0-1-1-1			33.3	0	0
TDP027	dgiy^RMHVQLGGAA	0-0-0-0-0-0-0-0-0-0-0-0-0-0-0-0-0-0-0-0-0-0-0-0-0-0-0-0-0-0-0-0-0-0-0-0-0-0-0-0-0-1-1-0-0-0-1-1-0-1-1-1			34.2	0	0
TDP027	DGIYRMHVQLGGAA	1-1-1-1-1-1-1-1-1-1-1-1-1-1-1-1-1-1-1-1-1-1-1-1-1-1-1-1-1-1-1-1-1-1-1-1-1-1-1-1-1-1-1-1-1-1-1-1-1-1-1-1	3 times in 3 NECs		33.2	28.1	0
TDP027	d^GIYRMHVQLGGAA	1-1-1-1-1-1-1-1-1-1-0-1-1-1-1-1-1-1-1-1-1-1-1-1-1-1-1-1-1-1-1-1-1-1-1-1-1-1-1-1-1-0-0-0-1-1-1-0-1-1-0-0	3 times in 3 NECs		31.8	26.8	0
TDP027	dgiyr^MHVQLGGAA	0-0-0-0-0-0-0-0-0-0-0-0-0-0-0-0-0-0-0-0-0-0-0-0-0-0-0-0-0-0-0-0-0-0-0-0-0-0-0-0-0-1-1-0-0-0-1-0-0-0-0-0			19	0	0
TDP027	dgiyrm^HVQLGGAA	0-0-0-0-1-0-0-0-0-0-0-0-1-1-0-0-1-1-0-0-0-0-0-0-0-0-0-0-0-0-0-0-0-0-0-0-0-0-0-0-0-0-1-1-0-0-1-1-0-0-1-1			18.8	0	0
TDP027	dg^IYRMHVQLGGAA	1-1-1-1-1-0-1-1-1-1-1-1-1-0-1-1-0-1-0-0-0-0-0-0-0-0-0-0-0-0-1-1-1-1-1-1-0-1-1-1-0-0-0-0-1-1-0-0-1-0-0-0	2 times in 3 NECs		23.4	20.8	0
TDP027	DGIYRMHVQLGGA^a	0-0-0-1-1-0-1-0-1-1-0-0-1-0-0-0-0-0-0-0-0-0-0-0-0-0-0-0-0-0-0-0-0-0-0-0-0-0-0-0-0-1-0-0-0-0-0-0-0-1-0-0			24.9	0	0
TDP027	DGIYRMHVQLG^gaa	0-1-1-0-1-0-1-0-0-1-0-0-1-1-0-0-0-0-1-0-0-0-0-0-0-0-0-0-0-0-0-0-0-0-0-0-0-0-0-1-0-0-0-0-0-0-1-1-1-0-0-0	1 times in 3 NECs		22.8	15.5	0
TDP027	DGIYRMHVQ^lggaa	0-0-0-0-0-0-0-0-0-0-0-0-0-0-0-0-0-0-0-0-0-0-0-0-0-0-0-0-0-0-0-0-0-0-0-0-0-0-0-0-0-0-0-0-0-0-1-1-0-0-1-0			21.8	0	0
TDP027	DGIYRMHVQLGG^aa	0-0-0-1-1-0-0-0-0-1-0-0-0-1-0-0-0-0-0-0-0-0-0-0-0-0-0-0-0-0-0-0-0-0-0-0-0-0-0-0-0-0-0-0-0-0-0-0-0-0-0-0			21.9	0	0
TDP027	DGIYRMHV^qlggaa	0-0-0-0-0-0-0-0-0-0-0-0-0-0-0-0-0-0-0-0-0-0-0-0-0-0-0-0-0-0-0-0-0-0-0-0-0-0-0-0-0-0-0-0-0-0-1-0-0-0-0-0			15.4	0	0
TDP027	d^GIYRMHVQLGGA^a	0-0-0-0-0-0-0-0-0-0-0-0-1-0-0-0-0-0-0-0-0-0-0-0-0-0-0-0-0-0-0-0-0-0-0-0-0-0-0-0-0-0-0-0-0-0-0-0-0-0-0-0			16.5	0	0
TDP027	d^GIYRMHVQLG^gaa	0-0-0-0-0-0-0-0-0-0-0-0-0-1-0-0-0-0-0-0-0-0-0-0-0-0-0-0-0-0-0-0-0-0-0-0-0-0-0-0-0-0-0-0-0-0-0-0-0-0-0-0			16.2	0	0
TDP027	dgiy^RMHVQL^ggaa	0-0-0-0-0-0-0-0-0-0-0-0-0-0-0-0-0-0-0-0-0-0-0-0-0-0-0-0-0-0-0-0-0-0-0-0-0-0-0-0-0-0-0-0-0-0-0-0-0-0-1-0			15.2	0	0
TDP028	TPKFAWDE	0-0-0-0-0-0-0-0-0-0-0-0-0-0-0-0-0-0-0-0-0-0-0-0-0-0-0-0-0-0-0-0-0-0-0-0-0-0-0-0-0-0-0-1-0-0-0-0-0-0-0-0			15.1	0	0
TDP028	PKFAWDES	0-0-0-0-0-0-0-0-0-0-0-0-0-0-0-0-0-0-0-0-0-0-0-0-0-0-0-0-0-0-0-0-0-0-0-0-0-0-0-0-0-0-0-0-0-0-0-1-0-0-0-0			17.3	0	0
TDP028	KFAWDESN	0-0-0-0-0-0-0-0-0-0-0-0-0-0-0-0-0-0-0-0-0-0-0-0-0-0-0-0-0-0-0-0-0-0-0-0-0-0-0-0-0-1-1-2-0-0-1-1-0-0-0-1			17.7	0	0
TDP028	FAWDESNG	0-0-1-1-1-0-0-0-0-0-0-0-0-0-0-1-0-0-0-0-0-0-0-0-0-0-0-0-0-0-0-0-0-0-0-0-0-0-0-0-0-0-0-0-0-0-0-0-0-0-0-1			18.2	0	0				FAWDESNG	FAWDESNG	FAWDESNG											FAWDESNG
TDP028	AWDESNGA	0-0-0-0-0-0-0-0-0-0-0-0-0-0-0-0-0-0-0-0-0-0-0-0-0-0-0-0-0-0-0-0-0-0-0-0-0-0-0-0-0-0-0-0-0-0-1-1-0-0-1-1			20.8	0	0
TDP028	DESNGAXX	0-1-1-1-0-1-1-1-1-0-1-1-1-1-1-0-1-1-0-0-0-0-0-0-0-0-0-0-0-0-0-0-0-0-0-0-0-0-0-0-0-0-0-0-0-0-0-0-0-0-0-0			20	0	0			DESNGAXX	DESNGAXX	DESNGAXX		DESNGAXX	DESNGAXX	DESNGAXX	DESNGAXX		DESNGAXX	DESNGAXX	DESNGAXX	DESNGAXX	DESNGAXX		DESNGAXX	DESNGAXX
TDP028	HGTPKFAW	0-0-0-0-0-0-0-0-0-0-0-0-0-0-0-0-0-0-0-0-0-0-0-0-0-0-0-0-0-0-0-0-0-0-0-0-0-0-0-0-0-0-0-1-0-0-0-1-0-0-1-0			18.4	0	0
TDP028	XXHGTPKF	0-1-0-0-0-0-0-1-0-0-1-0-0-0-0-1-0-0-0-0-0-0-0-0-0-0-0-0-0-0-0-0-0-0-0-0-0-0-0-0-1-0-0-1-0-1-1-0-1-0-0-0			20.8	0	0			XXHGTPKF						XXHGTPKF			XXHGTPKF					XXHGTPKF																									XXHGTPKF
--------
TDP028	HGTPKFAWDESNGA	1-1-1-1-1-1-1-1-1-1-1-1-1-1-1-1-1-1-1-1-1-1-1-1-1-1-1-1-1-1-1-1-1-1-1-1-1-1-1-1-1-1-1-0-1-1-1-0-1-1-1-1	3 times in 3 NECs		27.5	21.6	0
TDP028	HGTPKFAWDE^snga	0-0-0-0-0-0-0-0-0-0-0-0-0-0-0-0-0-0-0-0-0-0-0-0-0-0-0-0-0-0-0-0-0-0-0-0-0-0-0-0-0-0-0-0-0-0-1-1-0-0-1-1			20.8	0	0
TDP028	HGTPKFAWDESN^ga	0-1-1-1-0-1-1-1-1-0-1-1-1-1-1-0-1-1-0-0-0-0-0-0-0-0-0-0-0-0-0-0-0-0-0-0-0-0-0-0-0-0-0-0-0-0-0-0-0-0-0-0			20	0	0
TDP028	HGTPKFA^wdesnga	0-0-0-0-0-0-0-0-0-0-0-0-0-0-0-0-0-0-0-0-0-0-0-0-0-0-0-0-0-0-0-0-0-0-0-0-0-0-0-0-0-0-0-0-0-0-0-1-0-0-0-0			17.3	0	0
TDP028	HGTPKFAW^desnga	0-0-0-0-0-0-0-0-0-0-0-0-0-0-0-0-0-0-0-0-0-0-0-0-0-0-0-0-0-0-0-0-0-0-0-0-0-0-0-0-0-1-1-1-0-0-1-1-0-0-0-1			17.7	0	0
TDP028	hg^TPKFAWDESNGA	0-1-0-0-0-0-0-1-0-0-1-0-0-0-0-1-0-0-0-0-0-0-0-0-0-0-0-0-0-0-0-0-0-0-0-0-0-0-0-0-1-0-0-0-0-1-1-0-1-0-0-0			20.8	0	0
TDP028	HGTPKF^awdesnga	0-0-0-0-0-0-0-0-0-0-0-0-0-0-0-0-0-0-0-0-0-0-0-0-0-0-0-0-0-0-0-0-0-0-0-0-0-0-0-0-0-0-0-1-0-0-0-0-0-0-0-0			15.1	0	0
TDP028	HGTPKFAWD^esnga	0-0-1-1-1-0-0-0-0-0-0-0-0-0-0-1-0-0-0-0-0-0-0-0-0-0-0-0-0-0-0-0-0-0-0-0-0-0-0-0-0-0-0-0-0-0-0-0-0-0-0-1			18.2	0	0
TDP028	hgtp^KFAWDESNGA	0-0-0-0-0-0-0-0-0-0-0-0-0-0-0-0-0-0-0-0-0-0-0-0-0-0-0-0-0-0-0-0-0-0-0-0-0-0-0-0-0-0-0-1-0-0-0-1-0-0-1-0			18.4	0	0
TDP028	hg^TPKFAW^desnga	0-0-0-0-0-0-0-0-0-0-0-0-0-0-0-0-0-0-0-0-0-0-0-0-0-0-0-0-0-0-0-0-0-0-0-0-0-0-0-0-0-0-0-1-0-0-0-0-0-0-0-0			15.7	0	0
TDP029	GVRNDFTE	0-0-0-1-1-0-0-0-0-1-0-0-1-1-0-0-1-1-0-0-0-0-0-0-0-0-0-0-0-0-0-0-0-0-0-0-0-0-0-0-0-0-0-0-0-0-1-0-0-0-1-1			24.4	0	0					GVRNDFTE	GVRNDFTE					GVRNDFTE			GVRNDFTE	GVRNDFTE			GVRNDFTE	GVRNDFTE
TDP029	VRNDFTEA	0-0-0-0-1-0-0-0-0-0-0-0-0-0-0-0-0-0-0-0-0-0-0-0-0-0-0-0-0-0-0-0-0-0-0-0-0-0-0-0-0-0-0-1-0-0-1-2-0-0-0-1			26.4	0	0						VRNDFTEA
TDP029	RNDFTEAX	0-0-1-1-1-1-0-0-1-0-1-1-1-0-1-0-1-0-1-1-0-0-0-0-0-0-1-0-0-0-1-0-0-1-1-1-0-0-0-1-0-1-0-0-0-0-1-0-1-1-1-1	1 times in 3 NECs		28.2	17.4	0				RNDFTEAX	RNDFTEAX	RNDFTEAX	RNDFTEAX			RNDFTEAX		RNDFTEAX	RNDFTEAX	RNDFTEAX		RNDFTEAX		RNDFTEAX		RNDFTEAX	RNDFTEAX							RNDFTEAX				RNDFTEAX			RNDFTEAX	RNDFTEAX	RNDFTEAX				RNDFTEAX
TDP029	NDFTEAXX	0-0-0-1-1-0-0-0-1-1-0-0-1-1-0-0-0-0-0-0-0-0-0-0-0-0-0-0-0-0-0-0-0-0-0-0-0-0-0-0-0-0-0-0-0-0-0-0-0-0-0-0			24.8	0	0					NDFTEAXX	NDFTEAXX				NDFTEAXX	NDFTEAXX			NDFTEAXX	NDFTEAXX
TDP029	XXXAGSWK	0-0-0-0-0-1-0-0-0-0-0-0-0-0-0-0-0-0-0-0-0-0-0-0-0-0-0-0-0-0-0-0-0-0-0-0-0-0-0-0-0-0-0-0-0-0-0-0-0-0-0-0			19.5	0	0							XXXAGSWK
TDP029	GSWKGVRN	0-0-0-0-0-0-0-0-0-0-0-0-0-0-0-0-0-0-0-0-0-0-0-0-0-0-0-0-0-0-0-0-0-0-0-0-0-0-0-0-0-0-0-0-0-1-1-1-0-0-1-1			18.1	0	0
TDP029	XXAGSWKG	0-0-0-0-0-0-0-0-0-0-0-0-0-0-0-0-0-0-0-0-0-0-0-0-0-0-0-0-0-0-0-0-0-0-0-0-0-0-0-0-0-0-0-1-0-0-1-2-0-0-0-0			23.5	0	0
TDP029	SWKGVRND	0-0-0-0-0-0-0-0-0-0-0-0-0-0-0-0-0-0-0-0-0-0-0-0-0-0-0-0-0-0-0-0-0-0-0-0-0-0-0-0-0-0-1-0-0-0-0-1-0-0-0-1			17.1	0	0
--------
TDP029	AGSWKGVRNDFTEA	1-1-0-1-0-1-1-1-1-1-1-1-1-0-1-1-1-1-1-1-1-1-0-0-0-0-1-1-1-0-1-1-0-0-1-1-1-1-1-0-1-0-0-0-1-1-1-0-0-0-1-0	3 times in 3 NECs		32.8	25.5	0
TDP029	AGSWKGVRNDF^tea	0-0-1-1-1-1-0-0-1-0-1-1-1-0-1-0-1-0-1-1-0-0-0-0-0-0-1-0-0-0-1-0-0-1-1-1-0-0-0-1-0-1-0-0-0-0-1-0-1-1-1-1	1 times in 3 NECs		28.2	17.4	0
TDP029	ag^SWKGVRNDFTEA	0-0-0-0-0-0-0-0-0-0-0-0-0-0-0-0-0-0-0-0-0-0-0-0-0-0-0-0-0-0-0-0-0-0-0-0-0-0-0-0-0-0-0-0-0-0-1-1-0-0-0-0			23.5	0	0
TDP029	AGSWKGVRNDFT^ea	0-0-0-1-1-0-0-0-1-1-0-0-1-1-0-0-0-0-0-0-0-0-0-0-0-0-0-0-0-0-0-0-0-0-0-0-0-0-0-0-0-0-0-0-0-0-0-0-0-0-0-0			24.8	0	0
TDP029	AGSWKGVRND^ftea	0-0-0-0-1-0-0-0-0-0-0-0-0-0-0-0-0-0-0-0-0-0-0-0-0-0-0-0-0-0-0-0-0-0-0-0-0-0-0-0-0-0-0-0-0-0-1-1-0-0-0-1			26.4	0	0
TDP029	AGSWKGVRN^dftea	0-0-0-1-1-0-0-0-0-1-0-0-1-1-0-0-1-1-0-0-0-0-0-0-0-0-0-0-0-0-0-0-0-0-0-0-0-0-0-0-0-0-0-0-0-0-1-0-0-0-1-1			24.4	0	0
TDP029	a^GSWKGVRNDFTEA	0-0-0-0-0-1-0-0-0-0-0-0-0-0-0-0-0-0-0-0-0-0-0-0-0-0-0-0-0-0-0-0-0-0-0-0-0-0-0-0-0-0-0-0-0-0-0-0-0-0-0-0			19.5	0	0
TDP029	agswk^GVRNDFTEA	0-0-0-0-0-0-0-0-0-0-0-0-0-0-0-0-0-0-0-0-0-0-0-0-0-0-0-0-0-0-0-0-0-0-0-0-0-0-0-0-0-0-0-0-0-1-1-1-0-0-1-1			18.1	0	0
TDP029	agswkg^VRNDFTEA	0-0-0-0-0-0-0-0-0-0-0-0-0-0-0-0-0-0-0-0-0-0-0-0-0-0-0-0-0-0-0-0-0-0-0-0-0-0-0-0-0-0-1-0-0-0-0-1-0-0-0-1			17.1	0	0
TDP029	ag^SWKGVRND^ftea	0-0-0-0-0-0-0-0-0-0-0-0-0-0-0-0-0-0-0-0-0-0-0-0-0-0-0-0-0-0-0-0-0-0-0-0-0-0-0-0-0-0-0-1-0-0-0-1-0-0-0-0			16.3	0	0
TDP030	QMIEAPLH	0-0-0-0-0-0-0-0-0-0-0-0-0-0-0-0-0-0-0-0-0-0-0-0-0-0-0-0-0-0-0-0-0-0-0-0-0-0-0-0-0-0-0-0-0-0-1-0-0-0-0-0			16.5	0	0
TDP030	TQMIEAPL	0-0-0-0-0-0-0-0-0-0-0-0-0-0-0-0-0-0-0-0-0-0-0-0-0-0-0-0-0-0-0-0-0-0-0-0-0-0-0-0-0-0-0-0-0-0-0-1-0-0-1-0			20.7	0	0
TDP030	GTQMIEAP	1-1-1-1-3-0-0-0-0-0-0-0-0-0-0-0-0-1-0-0-0-0-0-0-0-0-0-0-0-0-0-0-0-0-0-0-0-0-0-0-0-0-3-3-0-1-1-3-0-0-0-1			24.1	0	0		GTQMIEAP	GTQMIEAP	GTQMIEAP	GTQMIEAP	GTQMIEAP													GTQMIEAP
TDP030	APLHYSAX	0-0-0-0-0-0-0-0-0-0-0-0-0-1-0-0-0-0-0-0-0-0-0-0-0-0-0-0-0-0-0-0-0-0-0-0-0-0-0-0-0-1-3-4-0-1-3-4-0-0-2-2			44.5	0	0															APLHYSAX
TDP030	PLHYSAXX	0-0-0-0-2-0-0-0-1-0-0-1-1-1-0-0-0-0-0-0-0-0-0-0-0-0-0-0-0-0-0-0-0-0-0-0-0-0-0-0-1-2-3-4-1-1-2-3-1-2-2-5			40.8	0	0						PLHYSAXX				PLHYSAXX			PLHYSAXX	PLHYSAXX	PLHYSAXX																											PLHYSAXX
TDP030	LHYSAXXX	1-1-0-1-2-1-1-0-1-1-1-1-1-1-0-0-1-1-0-0-0-0-0-0-0-0-0-0-0-0-0-0-0-1-1-0-0-0-1-0-0-0-1-0-0-0-1-1-0-1-1-0			39.3	0	0		LHYSAXXX	LHYSAXXX		LHYSAXXX	LHYSAXXX	LHYSAXXX	LHYSAXXX		LHYSAXXX	LHYSAXXX	LHYSAXXX	LHYSAXXX	LHYSAXXX	LHYSAXXX			LHYSAXXX	LHYSAXXX																LHYSAXXX	LHYSAXXX				LHYSAXXX
TDP030	PGTQMIEA	0-0-0-0-0-0-0-0-0-0-0-0-0-0-0-0-0-0-0-0-0-0-0-0-0-0-0-0-0-0-0-0-0-0-0-0-0-0-0-0-1-1-3-2-0-0-3-2-1-2-3-3			24.5	0	0																																										PGTQMIEA
TDP030	EAPLHYSA	0-0-0-0-0-0-0-0-0-0-0-0-0-0-0-0-0-0-0-0-0-0-0-0-0-0-0-0-0-0-0-0-0-0-0-0-0-0-0-0-0-1-1-1-0-0-1-1-0-1-1-1			18.1	0	0
TDP030	XPGTQMIE	0-0-0-0-0-0-0-0-0-0-0-0-0-0-0-0-0-0-0-0-0-0-0-0-0-0-0-0-0-0-0-0-0-0-0-0-0-0-0-0-0-0-0-1-0-0-0-0-0-0-0-1			22	0	0
TDP030	XXPGTQMI	1-1-0-1-0-1-1-1-1-1-1-1-1-0-1-1-1-1-1-1-0-1-0-0-0-0-0-1-0-1-1-0-1-1-1-1-0-1-0-1-0-1-0-1-0-1-2-2-1-0-0-1	1 times in 3 NECs		23.8	19.9	0		XXPGTQMI	XXPGTQMI		XXPGTQMI		XXPGTQMI	XXPGTQMI	XXPGTQMI	XXPGTQMI	XXPGTQMI	XXPGTQMI	XXPGTQMI	XXPGTQMI		XXPGTQMI	XXPGTQMI	XXPGTQMI	XXPGTQMI	XXPGTQMI	XXPGTQMI		XXPGTQMI						XXPGTQMI		XXPGTQMI	XXPGTQMI		XXPGTQMI	XXPGTQMI	XXPGTQMI	XXPGTQMI		XXPGTQMI		XXPGTQMI
--------
TDP030	PGTQMIEAPLHYS^a	1-1-0-1-1-1-1-0-1-1-1-1-1-1-0-0-1-1-0-0-0-0-0-0-0-0-0-0-0-0-0-0-0-1-1-0-0-0-1-0-0-0-1-0-0-0-1-1-0-1-1-0			39.3	0	0
TDP030	PGTQMIEAPLHYSA	1-1-1-1-1-1-1-1-1-1-1-1-1-1-1-1-1-1-1-1-1-1-1-1-1-1-1-1-1-1-1-1-1-1-1-1-1-1-1-1-1-1-1-1-1-1-1-1-1-1-1-1	3 times in 3 NECs		42.1	38.9	0
TDP030	PGTQMIEAPLH^ysa	0-0-0-0-0-0-0-0-0-0-0-0-0-1-0-0-0-0-0-0-0-0-0-0-0-0-0-0-0-0-0-0-0-0-0-0-0-0-0-0-0-1-1-1-0-1-1-1-0-0-1-1			44.5	0	0
TDP030	PGTQMIEAPLHY^sa	0-0-0-0-1-0-0-0-1-0-0-1-1-1-0-0-0-0-0-0-0-0-0-0-0-0-0-0-0-0-0-0-0-0-0-0-0-0-0-0-1-1-1-1-1-1-1-1-1-1-1-1			40.8	0	0
TDP030	pg^TQMIEAPLH^ysa	0-0-0-0-0-0-0-0-0-0-0-0-0-0-0-0-0-0-0-0-0-0-0-0-0-0-0-0-0-0-0-0-0-0-0-0-0-0-0-0-0-0-0-1-0-0-1-1-0-0-0-0			23.7	0	0
TDP030	pgt^QMIEAPLHY^sa	0-0-0-0-0-0-0-0-0-0-0-0-0-0-0-0-0-0-0-0-0-0-0-0-0-0-0-0-0-0-0-0-0-0-0-0-0-0-0-0-0-0-0-1-0-0-0-0-0-0-0-1			22	0	0
TDP030	pg^TQMIEAPLHYSA	1-1-0-1-0-1-1-1-1-1-1-1-1-0-1-1-1-1-1-1-0-1-0-0-0-0-0-1-0-1-1-0-1-1-1-1-0-1-0-1-0-1-0-0-0-1-1-1-1-0-0-0	1 times in 3 NECs		23.8	19.9	0
TDP030	pgtq^MIEAPLHYSA	0-0-0-0-0-0-0-0-0-0-0-0-0-0-0-0-0-0-0-0-0-0-0-0-0-0-0-0-0-0-0-0-0-0-0-0-0-0-0-0-1-0-1-0-0-0-1-0-1-1-1-1			22.4	0	0
TDP030	pgtqm^IEAPLHYSA	1-1-1-1-1-0-0-0-0-0-0-0-0-0-0-0-0-1-0-0-0-0-0-0-0-0-0-0-0-0-0-0-0-0-0-0-0-0-0-0-0-0-1-1-0-1-1-1-0-0-0-0			24.1	0	0
TDP030	pgtq^MIEAPLH^ysa	0-0-0-0-0-0-0-0-0-0-0-0-0-0-0-0-0-0-0-0-0-0-0-0-0-0-0-0-0-0-0-0-0-0-0-0-0-0-0-0-0-0-1-1-0-0-1-1-0-0-1-1			24.5	0	0
TDP030	pg^TQMIEAPLHY^sa	0-0-0-0-0-0-0-0-0-0-0-0-0-0-0-0-0-0-0-0-0-0-0-0-0-0-0-0-0-0-0-0-0-0-0-0-0-0-0-0-0-0-0-0-0-0-0-0-0-0-0-1			22.9	0	0
TDP030	PGTQMIEAPL^hysa	0-0-0-0-0-0-0-0-0-0-0-0-0-0-0-0-0-0-0-0-0-0-0-0-0-0-0-0-0-0-0-0-0-0-0-0-0-0-0-0-0-1-1-1-0-0-1-1-0-1-1-1			18.1	0	0
TDP030	pgtq^MIEAPLHY^sa	0-0-0-0-0-0-0-0-0-0-0-0-0-0-0-0-0-0-0-0-0-0-0-0-0-0-0-0-0-0-0-0-0-0-0-0-0-0-0-0-0-1-1-1-0-0-1-1-0-1-1-1			22.5	0	0
TDP030	pgtqm^IEAPLH^ysa	0-0-0-0-0-0-0-0-0-0-0-0-0-0-0-0-0-0-0-0-0-0-0-0-0-0-0-0-0-0-0-0-0-0-0-0-0-0-0-0-0-0-1-1-0-0-0-1-0-0-0-0			21.2	0	0
TDP030	pgtqm^IEAPLHY^sa	0-0-0-0-1-0-0-0-0-0-0-0-0-0-0-0-0-0-0-0-0-0-0-0-0-0-0-0-0-0-0-0-0-0-0-0-0-0-0-0-0-0-1-1-0-0-0-1-0-0-0-1			17	0	0
TDP030	pgtqmi^EAPLHYSA	0-0-0-0-0-0-0-0-0-0-0-0-0-0-0-0-0-0-0-0-0-0-0-0-0-0-0-0-0-0-0-0-0-0-0-0-0-0-0-0-0-0-0-0-0-0-0-1-0-0-1-0			20.7	0	0
TDP030	pgtqm^IEAPLHYS^a	0-0-0-0-1-0-0-0-0-0-0-0-0-0-0-0-0-0-0-0-0-0-0-0-0-0-0-0-0-0-0-0-0-0-0-0-0-0-0-0-0-0-0-0-0-0-0-0-0-0-0-0			15.2	0	0
TDP030	pgtqmie^APLHYSA	0-0-0-0-0-0-0-0-0-0-0-0-0-0-0-0-0-0-0-0-0-0-0-0-0-0-0-0-0-0-0-0-0-0-0-0-0-0-0-0-0-0-0-0-0-0-1-0-0-0-0-0			16.5	0	0
TDP031	XXXQGHET	0-0-0-0-0-0-0-0-0-0-0-0-0-0-0-0-0-0-0-0-0-0-0-0-0-0-0-0-0-0-0-0-0-0-0-0-0-0-0-1-1-1-0-0-1-1-2-0-1-1-3-0			27	0	0																																									XXXQGHET	XXXQGHET
TDP031	TRWLIFVS	0-1-1-1-1-0-0-0-0-1-0-1-1-1-0-1-1-1-0-0-0-0-0-0-0-0-0-0-0-0-0-0-0-0-0-0-0-0-0-0-1-1-1-1-0-1-1-1-1-1-2-1			28.4	0	0			TRWLIFVS	TRWLIFVS	TRWLIFVS	TRWLIFVS					TRWLIFVS		TRWLIFVS	TRWLIFVS	TRWLIFVS		TRWLIFVS	TRWLIFVS	TRWLIFVS																							TRWLIFVS
TDP031	WLIFVSNA	1-1-1-1-1-0-0-0-1-1-1-1-1-1-1-1-1-1-0-0-0-0-0-0-0-0-0-0-0-0-0-0-0-1-0-0-0-0-0-1-1-1-1-0-0-1-1-1-1-1-2-0			29.2	0	0		WLIFVSNA	WLIFVSNA	WLIFVSNA	WLIFVSNA	WLIFVSNA				WLIFVSNA	WLIFVSNA	WLIFVSNA	WLIFVSNA	WLIFVSNA	WLIFVSNA	WLIFVSNA	WLIFVSNA	WLIFVSNA	WLIFVSNA																WLIFVSNA						WLIFVSNA	WLIFVSNA
TDP031	LIFVSNAX	0-0-0-0-0-0-0-0-0-1-0-0-0-0-0-0-0-0-0-0-0-0-0-0-0-0-0-0-0-0-0-0-0-0-0-0-0-0-0-0-1-1-1-0-1-0-2-0-0-1-1-0			30.4	0	0											LIFVSNAX																															LIFVSNAX
TDP031	ETRWLIFV	0-1-1-1-1-0-0-0-0-0-0-0-0-1-0-0-0-0-0-0-0-0-0-0-0-0-0-0-0-0-0-0-0-0-0-0-0-0-0-0-0-1-1-1-0-0-1-1-0-0-1-1			28.7	0	0			ETRWLIFV	ETRWLIFV	ETRWLIFV	ETRWLIFV									ETRWLIFV
TDP031	RWLIFVSN	0-0-0-1-1-0-0-0-0-0-0-0-1-1-0-0-1-1-0-0-0-0-0-0-0-0-0-0-0-0-0-0-0-0-0-0-0-0-0-0-0-1-0-0-0-1-1-1-0-0-1-0			32.1	0	0					RWLIFVSN	RWLIFVSN								RWLIFVSN	RWLIFVSN			RWLIFVSN	RWLIFVSN
TDP031	IFVSNAXX	1-1-1-1-0-1-1-1-1-1-1-1-1-1-0-0-0-0-0-0-0-0-0-0-0-0-0-0-0-0-0-0-0-0-0-0-0-0-0-1-0-1-1-0-1-1-1-0-1-1-1-0			34	0	0		IFVSNAXX	IFVSNAXX	IFVSNAXX	IFVSNAXX		IFVSNAXX	IFVSNAXX	IFVSNAXX	IFVSNAXX	IFVSNAXX	IFVSNAXX	IFVSNAXX	IFVSNAXX	IFVSNAXX																										IFVSNAXX
TDP031	FVSNAXXX	0-0-1-0-0-0-0-0-1-1-0-1-1-0-0-0-1-0-0-0-0-0-0-0-0-0-0-0-0-0-0-0-0-0-0-0-0-0-0-0-0-0-0-0-0-0-0-0-0-0-0-0			28.6	0	0				FVSNAXXX						FVSNAXXX	FVSNAXXX		FVSNAXXX	FVSNAXXX				FVSNAXXX
TDP031	GHETRWLI	0-0-0-0-0-0-0-0-0-0-0-0-0-0-0-0-0-0-0-0-0-0-0-0-0-0-0-0-0-0-0-0-0-0-0-0-0-0-0-0-0-0-0-0-0-0-1-0-0-0-0-0			15.8	0	0
--------
TDP031	QGHETRWLIFVSNA	1-1-1-1-1-1-1-1-1-1-2-1-2-1-1-1-1-1-1-1-1-2-1-1-1-1-1-2-2-2-1-1-2-1-1-1-1-1-1-1-2-1-1-1-1-1-1-0-2-1-1-1	3 times in 3 NECs		37.3	36	0
TDP031	QGHETRWLIFVS^na	1-1-1-1-0-1-1-1-1-1-1-1-1-1-0-0-0-0-0-0-0-0-0-0-0-0-0-0-0-0-0-0-0-0-0-0-0-0-0-1-0-1-1-0-1-1-1-0-1-1-1-0			34	0	0
TDP031	QGHETRWL^ifvsna	0-1-1-1-1-0-0-0-0-1-0-1-1-1-0-1-1-1-0-0-0-0-0-0-0-0-0-0-0-0-0-0-0-0-0-0-0-0-0-0-1-1-1-1-0-1-1-1-1-1-1-1			28.4	0	0
TDP031	QGHETRWLIFVSN^a	0-0-1-0-0-0-0-0-1-1-0-1-1-0-0-0-1-0-0-0-0-0-0-0-0-0-0-0-0-0-0-0-0-0-0-0-0-0-0-0-0-0-0-0-0-0-0-0-0-0-0-0			28.6	0	0
TDP031	QGHETRWLIFV^sna	0-0-0-0-0-0-0-0-0-1-0-0-0-0-0-0-0-0-0-0-0-0-0-0-0-0-0-0-0-0-0-0-0-0-0-0-0-0-0-0-1-1-1-0-1-0-1-0-0-1-1-0			30.4	0	0
TDP031	q^GHETRWLIFVSNA	0-0-0-0-0-0-0-0-0-0-0-0-0-0-0-0-0-0-0-0-0-0-0-0-0-0-0-0-0-0-0-0-0-0-0-0-0-0-0-1-1-1-0-0-1-1-1-0-1-1-1-0			27	0	0
TDP031	QGHETRWLIF^vsna	1-1-1-1-1-0-0-0-1-1-1-1-1-1-1-1-1-1-0-0-0-0-0-0-0-0-0-0-0-0-0-0-0-1-0-0-0-0-0-1-1-1-1-0-0-1-1-1-1-1-1-0			29.2	0	0
TDP031	q^GHETRWLIF^vsna	0-0-0-0-0-0-0-0-0-0-0-0-0-0-0-0-0-0-0-0-0-0-0-0-0-0-0-0-0-0-0-0-0-0-0-0-0-0-0-0-0-0-0-0-0-0-0-0-0-0-1-0			21.2	0	0
TDP031	QGHETRWLI^fvsna	0-0-0-1-1-0-0-0-0-0-0-0-1-1-0-0-1-1-0-0-0-0-0-0-0-0-0-0-0-0-0-0-0-0-0-0-0-0-0-0-0-1-0-0-0-1-1-1-0-0-1-0			32.1	0	0
TDP031	QGHETRW^lifvsna	0-1-1-1-1-0-0-0-0-0-0-0-0-1-0-0-0-0-0-0-0-0-0-0-0-0-0-0-0-0-0-0-0-0-0-0-0-0-0-0-0-1-1-1-0-0-1-1-0-0-1-1			28.7	0	0
TDP031	q^GHETRWL^ifvsna	0-0-0-0-0-0-0-0-0-0-0-0-0-0-0-0-0-0-0-0-0-0-0-0-0-0-0-0-0-0-0-0-0-0-0-0-0-0-0-0-0-0-0-0-0-0-0-0-0-0-1-0			17.9	0	0
TDP031	q^GHETRWLIFV^sna	0-0-0-0-0-0-0-0-0-0-0-0-0-0-0-0-0-0-0-0-0-0-0-0-0-0-0-0-0-0-0-0-0-0-0-0-0-0-0-0-0-0-0-0-0-0-1-0-0-0-0-0			16.5	0	0
TDP031	qghet^RWLIFVSNA	0-0-0-0-0-0-0-0-0-0-0-0-0-0-0-0-0-0-0-0-0-0-0-0-0-0-0-0-0-0-0-0-0-0-0-0-0-0-0-0-0-0-0-0-0-0-1-0-0-0-0-0			15.8	0	0
TDP032	GSPMDGYA	0-1-0-0-0-1-0-1-0-0-1-1-1-0-1-0-0-0-1-1-0-0-0-0-0-0-1-0-0-0-0-0-0-0-0-0-0-0-0-0-1-0-0-0-0-0-1-0-0-0-0-0			23.7	0	0			GSPMDGYA				GSPMDGYA		GSPMDGYA			GSPMDGYA	GSPMDGYA	GSPMDGYA		GSPMDGYA				GSPMDGYA	GSPMDGYA							GSPMDGYA														GSPMDGYA
TDP032	XXXRGSPM	1-1-0-1-0-1-1-1-1-1-0-1-0-0-0-0-0-0-1-0-0-0-0-0-0-0-0-1-0-1-1-1-1-1-0-0-1-0-0-1-1-1-1-1-0-0-1-2-0-0-0-1	1 times in 3 NECs		36.8	20.5	0		XXXRGSPM	XXXRGSPM		XXXRGSPM		XXXRGSPM	XXXRGSPM	XXXRGSPM	XXXRGSPM	XXXRGSPM		XXXRGSPM							XXXRGSPM									XXXRGSPM		XXXRGSPM	XXXRGSPM	XXXRGSPM	XXXRGSPM	XXXRGSPM			XXXRGSPM			XXXRGSPM	XXXRGSPM
TDP032	AQNKHAXX	0-0-0-0-0-0-0-0-0-0-0-0-0-0-0-0-0-0-0-0-0-1-0-0-0-0-0-0-0-0-0-0-0-0-0-0-0-0-0-0-1-1-1-1-1-1-1-1-1-1-1-1			31.1	0	0																							AQNKHAXX																			AQNKHAXX
TDP032	MDGYAQNK	0-0-0-0-0-0-0-0-0-0-0-0-0-0-0-0-0-0-0-0-0-0-0-0-0-0-0-0-0-0-0-0-0-0-0-0-0-0-0-0-0-0-1-1-0-0-1-1-0-0-0-1			22.7	0	0
TDP032	DGYAQNKH	0-0-0-0-0-0-0-0-0-0-0-0-0-0-0-0-0-0-0-0-0-0-0-0-0-0-0-0-0-0-0-0-0-0-0-0-0-0-0-0-0-0-0-1-0-0-1-1-0-0-0-1			21.1	0	0
TDP032	GYAQNKHA	0-0-0-0-0-0-0-0-0-0-0-0-0-1-0-0-0-0-0-0-0-0-0-0-0-0-0-0-0-0-0-0-0-0-0-0-0-0-0-0-0-1-0-0-0-0-1-1-0-1-1-1			24.9	0	0															GYAQNKHA
TDP032	YAQNKHAX	0-0-0-1-1-0-0-0-1-1-0-0-1-1-0-0-0-1-0-0-0-0-0-0-0-0-0-0-0-0-0-0-0-0-0-0-0-0-0-0-0-1-1-1-0-1-1-1-0-1-1-1			26.5	0	0					YAQNKHAX	YAQNKHAX				YAQNKHAX	YAQNKHAX			YAQNKHAX	YAQNKHAX				YAQNKHAX
TDP032	QNKHAXXX	1-0-1-0-0-1-0-1-0-0-1-1-1-1-1-1-0-0-0-0-0-0-0-0-0-0-0-0-0-0-1-0-0-0-0-0-0-0-0-1-1-0-0-0-0-0-1-0-1-1-1-0	2 times in 3 NECs		31.1	18.3	0		QNKHAXXX		QNKHAXXX			QNKHAXXX		QNKHAXXX			QNKHAXXX	QNKHAXXX	QNKHAXXX	QNKHAXXX	QNKHAXXX	QNKHAXXX															QNKHAXXX									QNKHAXXX	QNKHAXXX
TDP032	XXRGSPMD	1-1-1-1-1-1-1-1-0-0-1-1-1-1-1-1-1-0-1-1-1-1-0-0-0-0-1-1-1-1-1-1-0-1-1-0-0-1-1-1-1-0-0-1-1-1-1-1-1-1-1-1	3 times in 3 NECs		38.5	36.4	0		XXRGSPMD	XXRGSPMD	XXRGSPMD	XXRGSPMD	XXRGSPMD	XXRGSPMD	XXRGSPMD	XXRGSPMD			XXRGSPMD	XXRGSPMD	XXRGSPMD	XXRGSPMD	XXRGSPMD	XXRGSPMD	XXRGSPMD		XXRGSPMD	XXRGSPMD	XXRGSPMD	XXRGSPMD					XXRGSPMD	XXRGSPMD	XXRGSPMD	XXRGSPMD	XXRGSPMD	XXRGSPMD		XXRGSPMD	XXRGSPMD			XXRGSPMD	XXRGSPMD	XXRGSPMD	XXRGSPMD
--------
TDP032	RGSPMDGYAQNKHA	1-1-1-1-1-1-1-1-1-1-1-1-1-1-1-1-1-1-1-1-1-1-1-1-1-1-1-1-1-1-1-1-1-1-1-1-1-1-1-1-1-1-1-0-1-1-1-1-1-1-1-1	3 times in 3 NECs		38.4	35.7	0
TDP032	rg^SPMDGYAQNKHA	1-1-1-1-1-1-1-1-0-0-1-1-1-1-1-1-1-0-1-1-1-1-0-0-0-0-1-1-1-1-1-1-0-1-1-0-0-1-1-1-1-0-0-1-1-1-1-1-1-1-1-1	3 times in 3 NECs		38.5	36.4	0
TDP032	RGSPMDGYAQNK^ha	0-0-0-0-0-0-0-0-0-0-0-0-0-0-0-0-0-0-0-0-0-1-0-0-0-0-0-0-0-0-0-0-0-0-0-0-0-0-0-0-1-1-1-0-1-1-1-0-1-1-1-1			31.1	0	0
TDP032	RGSPMDGYAQNKH^a	1-0-1-0-0-1-0-1-0-0-1-1-1-1-1-1-0-0-0-0-0-0-0-0-0-0-0-0-0-0-1-0-0-0-0-0-0-0-0-1-1-0-0-0-0-0-1-0-1-1-1-0	2 times in 3 NECs		31.1	18.3	0
TDP032	r^GSPMDGYAQNKHA	1-1-0-1-0-1-1-1-1-1-0-1-0-0-0-0-0-0-1-0-0-0-0-0-0-0-0-1-0-1-1-1-1-1-0-0-1-0-0-1-1-1-1-0-0-0-1-1-0-0-0-1	1 times in 3 NECs		36.8	20.5	0
TDP032	RGSPMDGYAQN^kha	0-0-0-1-1-0-0-0-1-1-0-0-1-1-0-0-0-1-0-0-0-0-0-0-0-0-0-0-0-0-0-0-0-0-0-0-0-0-0-0-0-1-1-1-0-1-1-1-0-1-1-1			26.5	0	0
TDP032	RGSPMDGYAQ^nkha	0-0-0-0-0-0-0-0-0-0-0-0-0-1-0-0-0-0-0-0-0-0-0-0-0-0-0-0-0-0-0-0-0-0-0-0-0-0-0-0-0-1-0-0-0-0-1-1-0-1-1-1			24.9	0	0
TDP032	rgspm^DGYAQNKHA	0-1-0-0-0-1-0-1-0-0-1-1-1-0-1-0-0-0-1-1-0-0-0-0-0-0-1-0-0-0-0-0-0-0-0-0-0-0-0-0-1-0-0-0-0-0-1-0-0-0-0-0			23.7	0	0
TDP032	r^GSPMDGYAQNK^ha	0-0-0-0-0-0-0-0-0-0-0-0-0-0-0-0-0-0-0-0-0-0-0-0-0-0-0-0-0-0-0-0-0-0-0-0-0-0-0-0-0-0-0-1-0-0-0-1-0-0-0-0			18	0	0
TDP032	RGSPMDGYA^qnkha	0-0-0-0-0-0-0-0-0-0-0-0-0-0-0-0-0-0-0-0-0-0-0-0-0-0-0-0-0-0-0-0-0-0-0-0-0-0-0-0-0-0-0-1-0-0-1-1-0-0-0-1			21.1	0	0
TDP032	RGSPMDGY^aqnkha	0-0-0-0-0-0-0-0-0-0-0-0-0-0-0-0-0-0-0-0-0-0-0-0-0-0-0-0-0-0-0-0-0-0-0-0-0-0-0-0-0-0-1-1-0-0-1-1-0-0-0-1			22.7	0	0
TDP033	GGLLDHFY	0-0-0-0-0-0-0-0-0-0-0-0-0-0-0-0-0-0-0-0-0-0-0-0-0-0-0-0-0-0-0-0-0-0-0-0-0-0-0-0-0-0-1-0-0-0-0-0-0-0-0-0			18	0	0
TDP033	LLDHFYTS	0-0-0-0-0-0-0-0-0-0-0-0-0-0-0-0-0-0-0-0-0-0-0-0-0-0-0-0-0-0-0-0-0-0-0-0-0-0-0-0-0-0-1-0-0-0-0-0-0-0-0-0			15.7	0	0
TDP033	LDHFYTSQ	0-1-0-0-0-0-0-0-0-0-0-0-0-0-0-0-0-0-0-0-0-0-0-0-0-0-0-0-0-0-0-0-0-0-0-0-0-0-0-0-0-1-1-0-0-0-1-1-0-1-1-1			16.6	0	0			LDHFYTSQ
TDP033	DHFYTSQI	0-0-0-0-1-0-0-0-0-0-0-0-0-0-0-0-0-0-0-0-0-0-0-0-0-0-0-0-0-0-0-0-0-0-0-0-0-0-0-0-1-1-1-1-0-0-1-1-1-1-1-1			19	0	0						DHFYTSQI																																				DHFYTSQI
TDP033	HFYTSQIP	0-0-0-1-1-0-0-0-0-0-0-0-0-0-0-0-0-0-0-0-0-0-0-0-0-0-0-0-0-0-0-0-0-0-0-0-0-0-0-0-0-0-1-0-0-1-1-0-0-1-1-0			20.9	0	0					HFYTSQIP	HFYTSQIP
TDP033	YTSQIPAX	0-0-0-0-0-0-0-0-0-0-0-0-0-0-0-0-0-0-0-0-0-0-0-0-0-0-0-0-0-0-0-0-0-0-0-0-0-0-0-0-0-0-1-0-0-1-0-0-0-0-0-0			17.5	0	0
TDP033	SQIPAXXX	0-0-0-0-1-0-0-0-0-1-0-0-0-1-0-1-0-1-0-0-0-0-0-0-0-0-0-0-0-0-0-0-0-0-0-0-0-0-0-0-1-1-1-0-1-1-1-1-1-1-1-1			19.9	0	0						SQIPAXXX					SQIPAXXX				SQIPAXXX		SQIPAXXX		SQIPAXXX																							SQIPAXXX
TDP033	XXXGGLLD	0-0-0-0-0-0-0-0-0-0-0-0-0-0-0-0-0-0-0-0-0-0-0-0-0-0-0-0-0-0-0-0-0-0-0-0-0-0-0-0-0-1-1-0-1-1-1-1-1-0-1-0			23.2	0	0
TDP033	GLLDHFYT	0-0-0-0-0-0-0-0-0-0-0-0-0-0-0-0-0-0-0-0-0-0-0-0-0-0-0-0-0-0-0-0-0-0-0-0-0-0-0-0-0-1-1-0-0-0-1-1-0-0-1-0			18.5	0	0
TDP033	XGGLLDHF	0-0-0-0-0-0-0-0-0-0-0-0-0-0-0-0-0-0-0-0-0-0-0-0-0-0-0-0-0-0-0-0-0-0-0-0-0-0-0-0-0-1-1-0-0-0-1-0-0-1-1-0			25	0	0
TDP033	XXGGLLDH	1-1-0-1-1-1-0-1-1-0-0-0-1-0-1-0-1-0-1-1-0-0-0-0-0-0-0-0-0-1-0-1-1-1-0-1-0-0-0-1-0-1-0-0-0-1-1-0-1-1-1-0	1 times in 3 NECs		22.1	18	0		XXGGLLDH	XXGGLLDH		XXGGLLDH	XXGGLLDH	XXGGLLDH		XXGGLLDH	XXGGLLDH				XXGGLLDH		XXGGLLDH		XXGGLLDH		XXGGLLDH	XXGGLLDH										XXGGLLDH		XXGGLLDH	XXGGLLDH	XXGGLLDH		XXGGLLDH				XXGGLLDH
--------
TDP033	GGLLDHFYTSQIPA	1-1-1-1-1-1-1-1-1-1-1-1-1-1-1-1-1-1-1-1-1-1-1-1-1-1-1-1-1-1-1-1-1-1-1-1-1-1-1-1-1-1-1-0-1-1-1-1-1-1-1-1	3 times in 3 NECs		29.2	24.8	0
TDP033	g^GLLDHFYTSQIPA	0-0-0-0-0-0-0-0-0-0-0-0-0-0-0-0-0-0-0-0-0-0-0-0-0-0-0-0-0-0-0-0-0-0-0-0-0-0-0-0-0-1-1-0-1-1-1-1-1-0-1-0			23.2	0	0
TDP033	ggl^LDHFYTSQIPA	0-0-0-0-0-0-0-0-0-0-0-0-0-0-0-0-0-0-0-0-0-0-0-0-0-0-0-0-0-0-0-0-0-0-0-0-0-0-0-0-0-1-1-0-0-0-1-0-0-1-1-0			25	0	0
TDP033	GGLLDHFYT^sqipa	0-0-0-1-1-0-0-0-0-0-0-0-0-0-0-0-0-0-0-0-0-0-0-0-0-0-0-0-0-0-0-0-0-0-0-0-0-0-0-0-0-0-1-0-0-1-1-0-0-1-1-0			20.9	0	0
TDP033	GGLLDHFYTSQIP^a	0-0-0-0-1-0-0-0-0-1-0-0-0-1-0-1-0-1-0-0-0-0-0-0-0-0-0-0-0-0-0-0-0-0-0-0-0-0-0-0-1-1-1-0-1-1-1-1-1-1-1-1			19.9	0	0
TDP033	gg^LLDHFYTSQIPA	1-1-0-1-1-1-0-1-1-0-0-0-1-0-1-0-1-0-1-1-0-0-0-0-0-0-0-0-0-1-0-1-1-1-0-1-0-0-0-1-0-1-0-0-0-1-1-0-1-1-1-0	1 times in 3 NECs		22.1	18	0
TDP033	GGLLDHFYTSQ^ipa	0-0-0-0-0-0-0-0-0-0-0-0-0-0-0-0-0-0-0-0-0-0-0-0-0-0-0-0-0-0-0-0-0-0-0-0-0-0-0-0-0-0-1-0-0-1-0-0-0-0-0-0			17.5	0	0
TDP033	ggll^DHFYTSQIPA	0-0-0-0-0-0-0-0-0-0-0-0-0-0-0-0-0-0-0-0-0-0-0-0-0-0-0-0-0-0-0-0-0-0-0-0-0-0-0-0-0-0-1-0-0-0-0-0-0-0-0-0			18	0	0
TDP033	gglld^HFYTSQIPA	0-0-0-0-0-0-0-0-0-0-0-0-0-0-0-0-0-0-0-0-0-0-0-0-0-0-0-0-0-0-0-0-0-0-0-0-0-0-0-0-0-1-1-0-0-0-1-1-0-0-1-0			18.5	0	0
TDP033	GGLLDHFY^tsqipa	0-0-0-0-1-0-0-0-0-0-0-0-0-0-0-0-0-0-0-0-0-0-0-0-0-0-0-0-0-0-0-0-0-0-0-0-0-0-0-0-1-1-1-1-0-0-1-1-1-1-1-1			19	0	0
TDP033	GGLLDHF^ytsqipa	0-1-0-0-0-0-0-0-0-0-0-0-0-0-0-0-0-0-0-0-0-0-0-0-0-0-0-0-0-0-0-0-0-0-0-0-0-0-0-0-0-1-1-0-0-0-1-1-0-1-1-1			16.6	0	0
TDP033	GGLLDH^fytsqipa	0-0-0-0-0-0-0-0-0-0-0-0-0-0-0-0-0-0-0-0-0-0-0-0-0-0-0-0-0-0-0-0-0-0-0-0-0-0-0-0-0-0-1-0-0-0-0-0-0-0-0-0			15.7	0	0
TDP034	XXXSAMMK	0-0-0-0-0-0-0-0-0-0-0-1-0-0-0-0-0-0-0-0-0-0-0-0-0-0-0-0-0-0-0-0-0-0-0-0-0-0-0-0-1-0-0-0-0-0-1-1-1-1-0-0	1 times in 3 NECs		31.9	28.7	0													XXXSAMMK																													XXXSAMMK
TDP034	GEVARPLG	0-0-0-0-0-0-0-0-0-0-0-0-0-0-0-0-0-0-0-0-0-0-0-0-0-0-0-0-0-0-0-0-0-0-0-0-0-0-0-0-1-1-1-0-1-1-1-2-1-1-1-0			26.6	0	0																																										GEVARPLG
TDP034	MKIGEVAR	0-0-0-0-0-0-0-0-0-0-0-0-0-0-0-0-0-0-0-0-0-0-0-0-0-0-0-0-0-0-0-0-0-0-0-0-0-0-0-0-0-1-0-0-0-1-3-2-1-1-0-2			18.5	0	0
TDP034	MMKIGEVA	0-0-0-0-0-0-0-0-0-0-0-0-0-0-0-0-0-0-0-0-0-0-0-0-0-0-0-0-0-0-0-0-0-0-0-0-0-0-0-0-0-1-0-1-0-0-1-1-0-1-1-1			19	0	0
TDP034	AMMKIGEV	0-0-0-0-1-0-0-0-0-0-0-0-0-0-0-0-0-0-0-0-0-1-0-0-0-0-0-0-0-0-0-0-0-0-0-0-0-0-0-0-1-1-1-2-1-1-1-2-1-1-1-2			30.1	0	0						AMMKIGEV																	AMMKIGEV																			AMMKIGEV
TDP034	ARPLGXXX	0-0-0-0-0-0-0-0-0-0-0-0-1-1-0-0-0-1-0-0-0-0-0-0-0-0-0-0-0-0-0-0-0-0-1-0-0-0-0-1-0-1-1-2-0-0-1-1-0-1-1-2			38.2	0	0														ARPLGXXX	ARPLGXXX				ARPLGXXX																	ARPLGXXX					ARPLGXXX
TDP034	SAMMKIGE	0-0-0-0-0-0-0-0-0-0-0-0-0-0-0-0-0-0-0-0-0-0-0-0-0-0-0-0-0-0-0-0-0-0-0-0-0-0-0-0-1-1-1-3-0-1-1-2-1-1-1-3			26.8	0	0																																										SAMMKIGE
TDP034	VARPLGXX	0-0-0-0-0-0-0-0-0-0-0-0-0-0-0-0-0-0-0-0-0-0-0-0-0-0-0-0-0-1-0-0-0-0-0-0-0-0-0-0-1-1-2-1-1-1-2-3-1-1-1-1			36.5	0	0																															VARPLGXX											VARPLGXX
TDP034	XSAMMKIG	1-0-1-1-1-0-0-0-0-0-0-1-1-1-0-1-1-1-0-0-0-1-0-0-0-0-0-0-0-1-0-1-0-1-0-0-0-0-0-0-1-1-1-0-0-0-0-0-1-1-1-0			29.4	0	0		XSAMMKIG		XSAMMKIG	XSAMMKIG	XSAMMKIG							XSAMMKIG	XSAMMKIG	XSAMMKIG		XSAMMKIG	XSAMMKIG	XSAMMKIG				XSAMMKIG								XSAMMKIG		XSAMMKIG		XSAMMKIG							XSAMMKIG
TDP034	XXSAMMKI	1-1-1-1-1-1-1-1-1-0-1-1-1-1-1-1-1-1-1-1-1-1-0-1-1-0-1-1-1-1-1-1-1-1-1-1-1-1-1-1-1-1-2-0-1-1-2-3-1-1-1-0	3 times in 3 NECs		36.4	29.2	0		XXSAMMKI	XXSAMMKI	XXSAMMKI	XXSAMMKI	XXSAMMKI	XXSAMMKI	XXSAMMKI	XXSAMMKI	XXSAMMKI		XXSAMMKI	XXSAMMKI	XXSAMMKI	XXSAMMKI	XXSAMMKI	XXSAMMKI	XXSAMMKI	XXSAMMKI	XXSAMMKI	XXSAMMKI	XXSAMMKI	XXSAMMKI		XXSAMMKI	XXSAMMKI		XXSAMMKI	XXSAMMKI	XXSAMMKI	XXSAMMKI	XXSAMMKI	XXSAMMKI	XXSAMMKI	XXSAMMKI	XXSAMMKI	XXSAMMKI	XXSAMMKI	XXSAMMKI	XXSAMMKI	XXSAMMKI	XXSAMMKI
TDP034	KIGEVARP	0-0-0-0-0-0-0-0-0-0-0-0-0-0-0-0-0-0-0-0-0-0-0-0-0-0-0-0-0-0-0-0-0-0-0-0-0-0-0-0-0-0-1-0-0-1-1-0-0-1-2-1			18.6	0	0
--------
TDP034	SAMMKIGEVARPLG	1-1-1-1-1-1-1-1-1-1-1-1-1-1-1-1-1-1-1-1-1-1-1-1-1-1-1-1-1-1-1-1-1-1-1-1-1-1-1-1-1-1-1-1-1-1-1-1-1-1-1-1	3 times in 3 NECs		46.4	37.6	0
TDP034	sa^MMKIGEVARPLG	1-1-1-1-1-1-1-1-1-0-1-1-1-1-1-1-1-1-1-1-1-1-0-1-1-0-1-1-1-1-1-1-1-1-1-1-1-1-1-1-1-1-1-0-1-1-1-1-1-1-1-0	3 times in 3 NECs		36.4	29.2	0
TDP034	s^AMMKIGEVARPLG	0-0-0-0-0-0-0-0-0-0-0-1-0-0-0-0-0-0-0-0-0-0-0-0-0-0-0-0-0-0-0-0-0-0-0-0-0-0-0-0-1-0-0-0-0-0-1-0-1-1-0-0	1 times in 3 NECs		31.9	28.7	0
TDP034	SAMMKIGEVARP^lg	0-0-0-0-0-0-0-0-0-0-0-0-0-0-0-0-0-0-0-0-0-0-0-0-0-0-0-0-0-1-0-0-0-0-0-0-0-0-0-0-1-1-1-0-1-1-1-1-1-1-1-0			36.5	0	0
TDP034	SAMMKIGEVARPL^g	0-0-0-0-0-0-0-0-0-0-0-0-1-1-0-0-0-1-0-0-0-0-0-0-0-0-0-0-0-0-0-0-0-0-1-0-0-0-0-1-0-1-1-0-0-0-1-0-0-1-1-0			38.2	0	0
TDP034	sam^MKIGEVARPLG	1-0-1-1-1-0-0-0-0-0-0-1-1-1-0-1-1-1-0-0-0-1-0-0-0-0-0-0-0-1-0-1-0-1-0-0-0-0-0-0-1-1-1-0-0-0-0-0-1-1-1-0			29.4	0	0
TDP034	sammkig^EVARPLG	0-0-0-0-0-0-0-0-0-0-0-0-0-0-0-0-0-0-0-0-0-0-0-0-0-0-0-0-0-0-0-0-0-0-0-0-0-0-0-0-0-0-0-0-0-0-2-1-0-0-0-2			18.5	0	0
TDP034	samm^KIGEVARPLG	0-0-0-0-0-0-0-0-0-0-0-0-0-0-0-0-0-0-0-0-0-0-0-0-0-0-0-0-0-0-0-0-0-0-0-0-0-0-0-0-1-1-1-1-0-1-1-1-1-1-1-1			26.8	0	0
TDP034	sammk^IGEVARPLG	0-0-0-0-1-0-0-0-0-0-0-0-0-0-0-0-0-0-0-0-0-1-0-0-0-0-0-0-0-0-0-0-0-0-0-0-0-0-0-0-1-1-1-1-1-1-1-1-1-1-1-1			30.1	0	0
TDP034	SAMMKIGE^varplg	0-0-0-0-0-0-0-0-0-0-0-0-0-0-0-0-0-0-0-0-0-0-0-0-0-0-0-0-0-0-0-0-0-0-0-0-0-0-0-0-0-0-1-0-0-1-1-0-0-1-1-1			18.6	0	0
TDP034	SAMMKIG^evarplg	0-0-0-0-0-0-0-0-0-0-0-0-0-0-0-0-0-0-0-0-0-0-0-0-0-0-0-0-0-0-0-0-0-0-0-0-0-0-0-0-0-1-0-0-0-1-1-1-1-1-0-0			18.4	0	0
TDP034	sa^MMKIGEVARP^lg	0-0-0-0-0-0-0-0-0-0-0-0-0-0-0-0-0-0-0-0-0-0-0-0-0-0-0-0-0-0-0-0-0-0-0-0-0-0-0-0-0-0-1-0-0-0-1-1-0-0-0-0			24.7	0	0
TDP034	SAMMKIGEVA^rplg	0-0-0-0-0-0-0-0-0-0-0-0-0-0-0-0-0-0-0-0-0-0-0-0-0-0-0-0-0-0-0-0-0-0-0-0-0-0-0-0-1-1-1-0-1-1-1-0-1-1-1-0			26.6	0	0
TDP034	sammk^IGEVARPL^g	0-0-0-0-0-0-0-0-0-0-0-0-0-0-0-0-0-0-0-0-0-0-0-0-0-0-0-0-0-0-0-0-0-0-0-0-0-0-0-0-0-0-0-1-0-0-0-1-0-0-0-1			23	0	0
TDP034	sammki^GEVARPLG	0-0-0-0-0-0-0-0-0-0-0-0-0-0-0-0-0-0-0-0-0-0-0-0-0-0-0-0-0-0-0-0-0-0-0-0-0-0-0-0-0-1-0-1-0-0-1-1-0-1-1-1			19	0	0
TDP034	sammkige^VARPLG	0-0-0-0-0-0-0-0-0-0-0-0-0-0-0-0-0-0-0-0-0-0-0-0-0-0-0-0-0-0-0-0-0-0-0-0-0-0-0-0-0-0-0-0-0-0-0-0-0-0-1-0			16.3	0	0
TDP034	samm^KIGEVARPL^g	0-0-0-0-0-0-0-0-0-0-0-0-0-0-0-0-0-0-0-0-0-0-0-0-0-0-0-0-0-0-0-0-0-0-0-0-0-0-0-0-0-0-0-1-0-0-0-0-0-0-0-1			20.9	0	0
TDP034	sa^MMKIGEVA^rplg	0-0-0-0-0-0-0-0-0-0-0-0-0-0-0-0-0-0-0-0-0-0-0-0-0-0-0-0-0-0-0-0-0-0-0-0-0-0-0-0-0-0-0-0-0-0-0-1-0-0-0-0			17.3	0	0
TDP034	samm^KIGEVARP^lg	0-0-0-0-0-0-0-0-0-0-0-0-0-0-0-0-0-0-0-0-0-0-0-0-0-0-0-0-0-0-0-0-0-0-0-0-0-0-0-0-0-0-0-1-0-0-0-1-0-0-0-1			16.4	0	0
TDP034	s^AMMKIGEVA^rplg	0-0-0-0-0-0-0-0-0-0-0-0-0-0-0-0-0-0-0-0-0-0-0-0-0-0-0-0-0-0-0-0-0-0-0-0-0-0-0-0-0-0-0-0-0-0-0-1-0-0-0-0			16.7	0	0
TDP035	XXXIARQP	0-0-0-0-0-0-0-0-0-0-0-0-0-0-0-0-0-0-0-0-0-0-0-0-0-0-0-0-0-0-0-0-0-0-0-0-0-0-0-0-0-1-0-0-0-1-1-0-0-0-0-0			23.8	0	0
TDP035	RQPWNMLK	0-0-0-0-0-0-0-0-0-0-0-0-0-0-0-0-0-0-0-0-0-0-0-0-0-0-0-0-0-0-0-0-0-0-0-0-0-0-0-0-1-2-1-1-1-1-2-1-1-1-1-1			17.2	0	0																																										RQPWNMLK
TDP035	QPWNMLKD	0-0-0-0-1-0-0-0-0-0-0-0-0-0-0-0-0-1-0-0-0-0-0-0-0-0-0-0-0-0-0-0-0-0-0-0-0-0-0-0-1-0-0-0-0-0-2-1-0-1-1-0			19.6	0	0						QPWNMLKD													QPWNMLKD																							QPWNMLKD
TDP035	PWNMLKDD	0-0-1-1-1-0-0-0-0-0-0-0-0-0-0-0-0-0-0-0-0-0-0-0-0-0-0-0-0-0-0-0-0-0-0-0-0-0-0-0-1-1-0-0-1-1-1-0-1-0-0-0			22.4	0	0				PWNMLKDD	PWNMLKDD	PWNMLKDD																																				PWNMLKDD
TDP035	WNMLKDDM	0-0-0-0-1-0-0-0-0-0-0-0-0-0-0-0-0-0-0-0-0-0-0-0-0-0-0-0-0-0-0-0-0-0-0-0-0-0-0-0-1-1-0-0-1-1-1-0-1-1-0-0			25.4	0	0						WNMLKDDM																																				WNMLKDDM
TDP035	NMLKDDMG	0-0-0-1-1-0-0-0-1-1-0-0-0-1-0-0-0-0-0-0-0-0-0-0-0-0-0-0-0-0-0-0-0-0-0-0-0-0-0-1-0-1-0-0-1-1-1-0-1-0-0-0			29.4	0	0					NMLKDDMG	NMLKDDMG				NMLKDDMG	NMLKDDMG				NMLKDDMG																										NMLKDDMG
TDP035	MLKDDMGX	0-1-1-1-1-0-0-1-1-1-0-0-1-1-0-0-1-1-0-0-0-0-0-0-0-0-0-0-0-0-0-0-1-1-0-0-1-0-0-0-1-1-0-0-1-1-1-0-1-1-0-0	2 times in 3 NECs		26.4	24.4	0			MLKDDMGX	MLKDDMGX	MLKDDMGX	MLKDDMGX			MLKDDMGX	MLKDDMGX	MLKDDMGX			MLKDDMGX	MLKDDMGX			MLKDDMGX	MLKDDMGX															MLKDDMGX	MLKDDMGX			MLKDDMGX				MLKDDMGX
TDP035	KDDMGXXX	0-0-1-1-1-0-0-0-1-1-0-0-1-1-0-0-0-0-0-0-0-0-0-0-0-0-0-0-0-0-0-0-0-0-0-0-0-0-0-0-0-0-0-0-0-0-0-0-0-0-0-0			27.8	0	0				KDDMGXXX	KDDMGXXX	KDDMGXXX				KDDMGXXX	KDDMGXXX			KDDMGXXX	KDDMGXXX
TDP035	XXIARQPW	0-0-0-0-0-0-0-0-0-0-0-0-0-0-0-0-0-0-0-0-0-0-0-0-0-0-0-0-0-0-0-0-0-0-0-0-0-0-0-0-1-1-0-0-0-1-2-0-1-1-0-0			26.4	0	0																																										XXIARQPW
--------
TDP035	IARQPWNMLKDDMG	1-1-1-1-1-1-1-1-1-1-1-1-1-1-1-1-1-1-1-1-1-1-1-1-1-1-1-1-1-1-1-1-1-1-1-1-1-1-1-1-1-1-0-0-1-1-1-1-1-1-1-0	3 times in 3 NECs		33.8	30	0
TDP035	ia^RQPWNMLKDDMG	0-0-0-0-0-0-0-0-0-0-0-0-0-0-0-0-0-0-0-0-0-0-0-0-0-0-0-0-0-0-0-0-0-0-0-0-0-0-0-0-1-1-0-0-0-1-1-0-1-1-0-0			26.4	0	0
TDP035	IARQPWNMLKD^dmg	0-1-1-1-1-0-0-1-1-1-0-0-1-1-0-0-1-1-0-0-0-0-0-0-0-0-0-0-0-0-0-0-1-1-0-0-1-0-0-0-1-1-0-0-1-1-1-0-1-1-0-0	2 times in 3 NECs		26.4	24.4	0
TDP035	IARQPWNMLK^ddmg	0-0-0-1-1-0-0-0-1-1-0-0-0-1-0-0-0-0-0-0-0-0-0-0-0-0-0-0-0-0-0-0-0-0-0-0-0-0-0-1-0-1-0-0-1-1-1-0-1-0-0-0			29.4	0	0
TDP035	i^ARQPWNMLKDDMG	0-0-0-0-0-0-0-0-0-0-0-0-0-0-0-0-0-0-0-0-0-0-0-0-0-0-0-0-0-0-0-0-0-0-0-0-0-0-0-0-0-1-0-0-0-1-1-0-0-0-0-0			23.8	0	0
TDP035	IARQPWNMLKDDM^g	0-0-1-1-1-0-0-0-1-1-0-0-1-1-0-0-0-0-0-0-0-0-0-0-0-0-0-0-0-0-0-0-0-0-0-0-0-0-0-0-0-0-0-0-0-0-0-0-0-0-0-0			27.8	0	0
TDP035	IARQPWNML^kddmg	0-0-0-0-1-0-0-0-0-0-0-0-0-0-0-0-0-0-0-0-0-0-0-0-0-0-0-0-0-0-0-0-0-0-0-0-0-0-0-0-1-1-0-0-1-1-0-0-1-1-0-0			25.4	0	0
TDP035	IARQPW^nmlkddmg	0-0-0-0-0-0-0-0-0-0-0-0-0-0-0-0-0-0-0-0-0-0-0-0-0-0-0-0-0-0-0-0-0-0-0-0-0-0-0-0-1-1-1-1-1-1-1-1-1-1-1-1			17.2	0	0
TDP035	IARQPWN^mlkddmg	0-0-0-0-0-0-0-0-0-0-0-0-0-0-0-0-0-1-0-0-0-0-0-0-0-0-0-0-0-0-0-0-0-0-0-0-0-0-0-0-1-0-0-0-0-0-1-0-0-1-1-0			19.6	0	0
TDP035	IARQPWNM^lkddmg	0-0-1-1-1-0-0-0-0-0-0-0-0-0-0-0-0-0-0-0-0-0-0-0-0-0-0-0-0-0-0-0-0-0-0-0-0-0-0-0-1-1-0-0-1-1-1-0-1-0-0-0			22.4	0	0
TDP035	iarqpwn^MLKDDMG	0-0-0-0-1-0-0-0-0-0-0-0-0-0-0-0-0-0-0-0-0-0-0-0-0-0-0-0-0-0-0-0-0-0-0-0-0-0-0-0-0-0-0-0-0-0-1-1-0-0-0-0			16.7	0	0
TDP035	iarqpw^NMLKDDMG	0-0-0-0-0-0-0-0-0-0-0-0-0-0-0-0-0-0-0-0-0-0-0-0-0-0-0-0-0-0-0-0-0-0-0-0-0-0-0-0-0-1-0-0-0-0-1-0-0-0-0-0			16.9	0	0
TDP035	ia^RQPWNML^kddmg	0-0-0-0-0-0-0-0-0-0-0-0-0-0-0-0-0-0-0-0-0-0-0-0-0-0-0-0-0-0-0-0-0-0-0-0-0-0-0-0-0-0-0-0-0-0-1-0-0-0-0-0			17	0	0
TDP036	XXXMAIHG	0-1-1-0-0-1-0-1-0-0-1-1-1-1-1-1-0-0-1-1-1-1-0-0-1-1-0-0-0-1-1-1-1-0-0-0-0-0-0-1-1-1-2-0-1-1-2-1-1-0-0-0			33.7	0	0			XXXMAIHG	XXXMAIHG			XXXMAIHG		XXXMAIHG			XXXMAIHG	XXXMAIHG	XXXMAIHG	XXXMAIHG	XXXMAIHG	XXXMAIHG			XXXMAIHG	XXXMAIHG	XXXMAIHG	XXXMAIHG			XXXMAIHG	XXXMAIHG				XXXMAIHG	XXXMAIHG	XXXMAIHG	XXXMAIHG							XXXMAIHG	XXXMAIHG
TDP036	YVTASRGX	0-0-0-0-0-0-0-0-0-0-0-0-0-0-0-0-0-0-0-1-1-0-0-0-0-0-0-0-0-0-0-0-0-0-0-0-0-0-0-0-1-1-1-0-1-1-0-1-1-1-1-0			18.9	0	0																					YVTASRGX	YVTASRGX																				YVTASRGX
TDP036	VTASRGXX	0-0-0-0-0-0-0-0-0-0-0-0-0-1-0-0-0-0-0-0-0-0-0-0-0-0-0-0-0-0-0-0-0-0-0-0-0-0-0-0-1-1-2-0-1-1-2-0-1-1-2-0			25.7	0	0															VTASRGXX																											VTASRGXX
TDP036	IHGFEYVT	0-0-0-0-1-0-0-0-0-0-0-0-0-0-0-0-0-0-0-0-0-0-0-0-0-0-0-0-0-0-0-0-0-0-0-0-0-0-0-0-1-1-1-0-1-1-2-1-1-1-1-1			21.7	0	0						IHGFEYVT																																				IHGFEYVT
TDP036	AIHGFEYV	0-0-0-0-1-0-0-0-0-0-0-0-0-0-0-0-0-0-0-0-0-1-0-0-0-0-0-0-0-0-0-0-0-0-0-0-0-0-0-0-0-1-1-1-0-1-1-1-0-0-1-0			23.5	0	0						AIHGFEYV																	AIHGFEYV
TDP036	MAIHGFEY	0-0-0-0-0-0-0-0-0-0-0-0-0-0-0-0-0-0-0-0-1-1-0-0-0-0-0-0-0-0-0-0-0-0-0-0-0-0-0-0-1-1-1-1-1-1-1-1-1-1-2-1			27.1	0	0																						MAIHGFEY	MAIHGFEY																			MAIHGFEY
TDP036	TASRGXXX	0-0-0-0-0-0-0-0-0-0-0-1-1-1-0-0-0-0-0-1-0-0-0-0-0-0-0-0-0-0-0-0-0-1-0-0-0-0-0-0-0-0-0-0-1-0-0-0-0-0-1-0			32.8	0	0													TASRGXXX	TASRGXXX	TASRGXXX						TASRGXXX														TASRGXXX
TDP036	XMAIHGFE	0-0-0-0-0-0-0-0-0-0-0-0-0-0-0-0-0-0-0-0-1-1-0-0-0-0-0-0-0-0-0-0-0-0-0-0-0-0-0-0-0-1-1-0-0-1-1-1-0-0-1-0			23.5	0	0																						XMAIHGFE	XMAIHGFE
TDP036	XXMAIHGF	0-0-0-0-0-0-0-0-0-0-0-0-0-0-0-0-0-0-0-0-0-0-0-0-0-0-0-0-0-0-0-0-0-0-0-0-0-0-0-0-1-1-2-0-0-1-1-0-1-1-2-0			32.5	0	0																																										XXMAIHGF
TDP036	HGFEYVTA	0-0-0-0-0-0-0-1-0-0-0-0-0-0-0-0-0-0-0-0-0-0-0-0-0-0-0-0-0-0-0-0-0-0-0-0-0-0-0-0-0-1-0-0-0-0-0-0-0-0-0-0			16	0	0									HGFEYVTA
TDP036	GFEYVTAS	0-0-1-1-1-0-0-0-0-0-0-0-0-0-0-0-0-0-0-0-0-0-0-0-0-0-0-0-0-0-0-0-0-0-0-0-0-0-0-0-0-1-1-0-0-0-1-0-0-1-1-0			20.3	0	0				GFEYVTAS	GFEYVTAS	GFEYVTAS
TDP036	FEYVTASR	0-0-0-0-0-0-0-0-0-0-0-0-0-0-0-0-0-0-0-0-0-0-0-0-0-0-0-0-0-0-0-0-0-0-0-0-0-0-0-0-0-1-1-0-0-1-1-0-0-0-1-0			17.3	0	0
TDP036	EYVTASRG	0-0-0-0-1-0-0-0-0-0-0-0-0-0-0-0-0-0-0-0-0-0-0-0-0-0-0-0-0-0-0-0-0-0-0-0-0-0-0-0-0-1-0-0-0-1-1-0-0-0-1-0			18	0	0						EYVTASRG
--------
TDP036	MAIHGFEYVTASRG	1-1-1-1-1-1-1-1-1-1-1-1-1-1-1-1-1-1-1-1-1-1-1-1-1-1-1-1-1-1-1-1-1-1-1-1-1-1-1-1-1-1-1-0-1-1-1-1-1-1-1-1	3 times in 3 NECs		39.6	31.7	0
TDP036	MAIHGFEYVTASR^g	0-0-0-0-0-0-0-0-0-0-0-1-1-1-0-0-0-0-0-1-0-0-0-0-0-0-0-0-0-0-0-0-0-1-0-0-0-0-0-0-0-0-0-0-1-0-0-0-0-0-0-0			32.8	0	0
TDP036	m^AIHGFEYVTASRG	0-1-1-0-0-1-0-1-0-0-1-1-1-1-1-1-0-0-1-1-1-1-0-0-1-1-0-0-0-1-1-1-1-0-0-0-0-0-0-1-1-1-1-0-1-1-1-1-1-0-0-0			33.7	0	0
TDP036	maih^GFEYVTASR^g	0-0-0-0-0-0-0-0-0-0-0-0-0-0-0-0-0-0-0-0-0-0-0-0-0-0-0-0-0-0-0-0-0-0-0-0-0-0-0-0-0-0-0-0-0-0-0-0-0-0-1-0			27.1	0	0
TDP036	ma^IHGFEYVTASRG	0-0-0-0-0-0-0-0-0-0-0-0-0-0-0-0-0-0-0-0-0-0-0-0-0-0-0-0-0-0-0-0-0-0-0-0-0-0-0-0-1-1-1-0-0-1-1-0-1-1-1-0			32.5	0	0
TDP036	mai^HGFEYVTASRG	0-0-0-0-0-0-0-0-0-0-0-0-0-0-0-0-0-0-0-0-1-1-0-0-0-0-0-0-0-0-0-0-0-0-0-0-0-0-0-0-0-1-1-0-0-1-1-1-0-0-1-0			23.5	0	0
TDP036	maihgf^EYVTASRG	0-0-0-0-0-0-0-0-0-0-0-0-0-0-0-0-0-0-0-0-0-0-0-0-0-0-0-0-0-0-0-0-0-0-0-0-0-0-0-0-0-0-0-0-0-0-1-1-0-0-0-1			21.7	0	0
TDP036	MAIHGFEYVTAS^rg	0-0-0-0-0-0-0-0-0-0-0-0-0-1-0-0-0-0-0-0-0-0-0-0-0-0-0-0-0-0-0-0-0-0-0-0-0-0-0-0-1-1-1-0-1-1-1-0-1-1-1-0			25.7	0	0
TDP036	maih^GFEYVTASRG	0-0-0-0-0-0-0-0-0-0-0-0-0-0-0-0-0-0-0-0-1-1-0-0-0-0-0-0-0-0-0-0-0-0-0-0-0-0-0-0-1-1-1-1-1-1-1-1-1-1-1-1			26.6	0	0
TDP036	maihg^FEYVTASRG	0-0-0-0-1-0-0-0-0-0-0-0-0-0-0-0-0-0-0-0-0-1-0-0-0-0-0-0-0-0-0-0-0-0-0-0-0-0-0-0-0-1-1-1-0-1-1-1-0-0-1-0			23.5	0	0
TDP036	ma^IHGFEYVTAS^rg	0-0-0-0-0-0-0-0-0-0-0-0-0-0-0-0-0-0-0-0-0-0-0-0-0-0-0-0-0-0-0-0-0-0-0-0-0-0-0-0-0-0-1-0-0-0-0-0-0-0-1-0			22.5	0	0
TDP036	MAIHGFEY^vtasrg	0-0-1-1-1-0-0-0-0-0-0-0-0-0-0-0-0-0-0-0-0-0-0-0-0-0-0-0-0-0-0-0-0-0-0-0-0-0-0-0-0-1-1-0-0-0-1-0-0-1-1-0			20.3	0	0
TDP036	m^AIHGFEYVTAS^rg	0-0-0-0-0-0-0-0-0-0-0-0-0-0-0-0-0-0-0-0-0-0-0-0-0-0-0-0-0-0-0-0-0-0-0-0-0-0-0-0-0-0-0-0-0-0-1-0-0-0-0-0			18.1	0	0
TDP036	MAIHGFEYVT^asrg	0-0-0-0-1-0-0-0-0-0-0-0-0-0-0-0-0-0-0-0-0-0-0-0-0-0-0-0-0-0-0-0-0-0-0-0-0-0-0-0-0-1-0-0-0-1-1-0-0-0-1-0			18	0	0
TDP036	MAIHGFEYVTA^srg	0-0-0-0-0-0-0-0-0-0-0-0-0-0-0-0-0-0-0-1-1-0-0-0-0-0-0-0-0-0-0-0-0-0-0-0-0-0-0-0-1-1-0-0-1-1-0-1-1-1-1-0			18.9	0	0
TDP036	m^AIHGFEYVTA^srg	0-0-0-0-0-0-0-0-0-0-0-0-0-0-0-0-0-0-0-0-0-0-0-0-0-0-0-0-0-0-0-0-0-0-0-0-0-0-0-0-0-0-1-0-0-0-0-0-0-0-0-0			16.8	0	0
TDP036	MAIHGFEYV^tasrg	0-0-0-0-0-0-0-0-0-0-0-0-0-0-0-0-0-0-0-0-0-0-0-0-0-0-0-0-0-0-0-0-0-0-0-0-0-0-0-0-0-1-1-0-0-1-1-0-0-0-1-0			17.3	0	0
TDP036	MAIHGFE^yvtasrg	0-0-0-0-0-0-0-1-0-0-0-0-0-0-0-0-0-0-0-0-0-0-0-0-0-0-0-0-0-0-0-0-0-0-0-0-0-0-0-0-0-1-0-0-0-0-0-0-0-0-0-0			16	0	0
TDP036	MAIHGF^eyvtasrg	0-0-0-0-1-0-0-0-0-0-0-0-0-0-0-0-0-0-0-0-0-0-0-0-0-0-0-0-0-0-0-0-0-0-0-0-0-0-0-0-1-1-1-0-1-1-1-0-1-1-1-0			15.8	0	0
TDP037	SSADIQGX	0-0-0-0-0-0-0-0-0-0-0-0-0-0-0-0-0-0-0-0-0-0-0-0-0-0-0-0-0-0-0-0-0-0-0-0-0-0-0-0-0-0-0-0-0-0-1-1-0-0-0-0			17.5	0	0
--------
TDP037	WAGTAKNSSADIQG	1-1-1-1-1-1-1-1-1-1-1-1-1-1-1-1-1-1-1-1-1-1-1-1-1-1-1-1-1-1-1-1-1-1-1-1-1-1-1-1-1-0-1-0-1-1-1-1-1-1-1-0	3 times in 3 NECs		27	25.3	0
TDP037	WAGTAKNSSAD^iqg	0-0-0-0-0-0-0-0-0-0-0-0-0-0-0-0-0-0-0-0-0-0-0-0-0-0-0-0-0-0-0-0-0-0-0-0-0-0-0-0-0-0-0-0-0-0-1-1-0-0-0-0			17.5	0	0
TDP038	XXXEAWMT	0-0-0-0-0-0-0-0-0-0-0-0-0-0-0-0-0-0-0-0-1-1-0-0-0-0-0-0-1-1-0-0-0-0-0-0-0-0-0-0-0-1-0-0-1-1-2-0-0-0-0-0			32.6	0	0																						XXXEAWMT	XXXEAWMT							XXXEAWMT	XXXEAWMT
TDP038	VPPRSAGX	0-0-0-0-0-0-0-0-0-1-0-0-1-0-0-0-0-0-0-0-0-0-0-0-0-0-0-0-0-0-0-0-0-0-0-0-0-0-0-0-1-1-0-1-1-1-2-4-1-1-0-0			36.5	0	0											VPPRSAGX			VPPRSAGX																												VPPRSAGX
TDP038	WMTFIVPP	0-0-0-0-0-0-0-0-0-0-0-0-1-0-0-0-1-0-0-0-0-0-0-0-0-0-0-0-0-0-0-0-0-1-0-0-0-0-0-0-0-0-0-0-0-0-0-0-2-1-1-0			17.5	0	0														WMTFIVPP				WMTFIVPP																	WMTFIVPP
TDP038	PPRSAGXX	0-0-0-0-0-0-0-0-0-0-0-0-1-1-0-0-0-0-0-0-0-0-0-0-0-0-0-0-0-0-0-0-0-0-0-0-0-0-0-0-0-0-0-0-0-1-0-1-0-0-0-0			20.8	0	0														PPRSAGXX	PPRSAGXX
TDP038	PRSAGXXX	0-0-0-0-0-0-0-0-0-1-0-0-1-1-0-0-0-0-0-0-0-0-0-0-0-0-0-0-0-0-0-0-0-0-0-0-0-0-0-0-0-0-0-0-0-0-1-1-0-0-0-0			22.5	0	0											PRSAGXXX			PRSAGXXX	PRSAGXXX
TDP038	AWMTFIVP	1-1-1-1-1-0-0-0-0-0-0-1-1-1-0-1-1-1-0-0-0-0-0-0-0-0-0-0-0-0-0-0-0-1-0-0-0-0-0-0-1-1-1-1-1-1-1-2-1-1-1-1			19.9	0	0		AWMTFIVP	AWMTFIVP	AWMTFIVP	AWMTFIVP	AWMTFIVP							AWMTFIVP	AWMTFIVP	AWMTFIVP		AWMTFIVP	AWMTFIVP	AWMTFIVP																AWMTFIVP							AWMTFIVP
TDP038	XEAWMTFI	0-0-1-1-1-0-0-0-0-0-0-0-1-1-0-0-0-1-0-0-0-0-0-0-0-0-0-0-0-0-0-1-0-1-1-0-0-0-1-1-1-1-1-0-0-1-1-2-0-1-1-0			28.3	0	0				XEAWMTFI	XEAWMTFI	XEAWMTFI								XEAWMTFI	XEAWMTFI				XEAWMTFI														XEAWMTFI		XEAWMTFI	XEAWMTFI				XEAWMTFI	XEAWMTFI	XEAWMTFI
TDP038	EAWMTFIV	0-0-1-1-1-0-0-0-0-0-0-0-0-0-0-0-0-0-0-0-0-0-0-0-0-0-0-0-0-0-0-0-0-0-0-0-0-0-0-0-1-1-1-2-1-1-1-3-1-1-1-1			22.9	0	0				EAWMTFIV	EAWMTFIV	EAWMTFIV																																				EAWMTFIV
TDP038	XXEAWMTF	0-1-0-0-0-1-0-1-0-0-0-0-0-0-1-0-0-0-0-0-0-0-0-0-0-0-0-0-0-0-0-0-1-0-0-0-0-0-0-1-0-0-0-0-0-0-0-0-0-0-0-0			23.4	0	0			XXEAWMTF				XXEAWMTF		XXEAWMTF							XXEAWMTF																		XXEAWMTF							XXEAWMTF
--------
TDP038	EAWMTFIVPPR^sag	0-0-0-0-0-0-0-0-0-1-0-0-1-0-0-0-0-0-0-0-0-0-0-0-0-0-0-0-0-0-0-0-0-0-0-0-0-0-0-0-1-1-0-0-1-1-1-1-1-1-0-0			36.5	0	0
TDP038	EAWMTFIVPPRSAG	2-2-2-1-0-2-2-2-1-2-1-2-2-2-2-1-2-2-1-2-1-2-2-2-2-2-2-2-2-2-1-2-2-2-2-2-2-2-2-2-2-1-1-0-2-2-2-0-2-2-1-1	5 times in 3 NECs		39.3	35.7	0
TDP038	e^AWMTFIVPPR^sag	0-0-0-0-0-0-0-0-0-0-0-0-0-0-0-0-0-0-0-0-0-0-0-0-0-0-0-0-0-0-0-0-0-0-0-0-0-0-0-0-0-0-0-0-0-0-1-0-0-0-0-0			26.3	0	0
TDP038	e^AWMTFIVPPRSAG	0-0-0-0-0-0-0-0-0-0-0-0-0-0-0-0-0-0-0-0-1-1-0-0-0-0-0-0-1-1-0-0-0-0-0-0-0-0-0-0-0-1-0-0-1-1-1-0-0-0-0-0			32.6	0	0
TDP038	eawm^TFIVPPR^sag	0-0-0-0-0-0-0-0-0-0-0-0-0-0-0-0-0-0-0-0-0-0-0-0-0-0-0-0-0-0-0-0-0-0-0-0-0-0-0-0-0-0-0-1-0-0-0-1-0-0-0-0			22.9	0	0
TDP038	eawm^TFIVPPRSA^g	0-0-0-0-0-0-0-0-0-0-0-0-0-0-0-0-0-0-0-0-0-0-0-0-0-0-0-0-0-0-0-0-0-0-0-0-0-0-0-0-0-0-0-0-0-0-0-1-0-0-0-0			20.7	0	0
TDP038	EAWMTFIVPPRSA^g	0-0-0-0-0-0-0-0-0-1-0-0-1-1-0-0-0-0-0-0-0-0-0-0-0-0-0-0-0-0-0-0-0-0-0-0-0-0-0-0-0-0-0-0-0-0-1-0-0-0-0-0			22.5	0	0
TDP038	eawm^TFIVPPRSAG	0-0-1-1-1-0-0-0-0-0-0-0-0-0-0-0-0-0-0-0-0-0-0-0-0-0-0-0-0-0-0-0-0-0-0-0-0-0-0-0-1-1-1-1-1-1-1-1-1-1-1-1			22.4	0	0
TDP038	eaw^MTFIVPPR^sag	0-0-0-0-0-0-0-0-0-0-0-0-0-0-0-0-0-0-0-0-0-0-0-0-0-0-0-0-0-0-0-0-0-0-0-0-0-0-0-0-0-0-0-0-0-0-0-1-0-0-0-0			27.5	0	0
TDP038	eaw^MTFIVPPRSAG	0-0-1-1-1-0-0-0-0-0-0-0-1-1-0-0-0-1-0-0-0-0-0-0-0-0-0-0-0-0-0-1-0-1-1-0-0-0-1-1-1-1-1-0-0-1-1-1-0-1-1-0			28.3	0	0
TDP038	ea^WMTFIVPPRSAG	0-1-0-0-0-1-0-1-0-0-0-0-0-0-1-0-0-0-0-0-0-0-0-0-0-0-0-0-0-0-0-0-1-0-0-0-0-0-0-1-0-0-0-0-0-0-0-0-0-0-0-0			23.4	0	0
TDP038	EAWMTFIVPPRS^ag	0-0-0-0-0-0-0-0-0-0-0-0-1-1-0-0-0-0-0-0-0-0-0-0-0-0-0-0-0-0-0-0-0-0-0-0-0-0-0-0-0-0-0-0-0-1-0-1-0-0-0-0			20.8	0	0
TDP038	eawmt^FIVPPRSAG	1-1-1-1-1-0-0-0-0-0-0-1-1-1-0-1-1-1-0-0-0-0-0-0-0-0-0-0-0-0-0-0-0-1-0-0-0-0-0-0-1-1-1-1-1-1-1-1-1-1-1-1			19.9	0	0
TDP038	eawmt^FIVPPR^sag	0-0-0-0-0-0-0-0-0-0-0-0-0-0-0-0-0-0-0-0-0-0-0-0-0-0-0-0-0-0-0-0-0-0-0-0-0-0-0-0-0-0-0-0-0-0-0-1-0-0-0-0			18.9	0	0
TDP038	eawmtf^IVPPRSAG	0-0-0-0-0-0-0-0-0-0-0-0-1-0-0-0-1-0-0-0-0-0-0-0-0-0-0-0-0-0-0-0-0-1-0-0-0-0-0-0-0-0-0-0-0-0-0-0-1-1-0-0			17.5	0	0
TDP038	EAWMTF^ivpprsag	0-0-0-0-0-0-0-0-0-0-0-0-0-0-0-0-0-0-0-0-0-0-0-0-0-0-0-0-0-0-0-0-0-0-0-0-0-0-0-0-0-0-0-0-0-0-0-0-1-0-1-0			15.6	0	0
TDP039	XHAWFSVI	0-0-0-0-1-0-0-0-0-0-0-0-0-0-0-0-0-0-0-0-0-0-0-0-0-0-0-0-0-0-0-0-0-0-0-0-0-0-0-0-0-1-1-1-0-0-1-1-0-0-1-1			26.2	0	0						XHAWFSVI
TDP039	VIIPNLGD	0-0-0-0-0-0-0-0-0-0-0-0-0-0-0-0-0-0-0-0-0-0-0-0-0-0-0-0-0-0-0-0-0-0-0-0-0-0-0-0-0-1-0-0-1-1-1-0-0-1-0-0			17.9	0	0
TDP039	NLGDGXXX	0-1-0-0-0-0-0-1-1-0-1-1-1-0-1-1-0-0-0-1-0-0-0-0-0-0-0-0-0-0-0-0-1-1-1-0-0-0-0-1-1-1-0-0-1-1-0-0-1-1-0-0	1 times in 3 NECs		29.1	21.4	0			NLGDGXXX						NLGDGXXX	NLGDGXXX		NLGDGXXX	NLGDGXXX	NLGDGXXX		NLGDGXXX	NLGDGXXX				NLGDGXXX													NLGDGXXX	NLGDGXXX	NLGDGXXX					NLGDGXXX	NLGDGXXX
TDP039	HAWFSVII	1-1-0-1-1-0-0-0-0-0-0-0-1-1-0-0-1-1-0-0-0-0-0-0-0-0-0-0-0-0-0-0-0-0-0-0-0-0-0-0-1-1-1-1-1-1-1-1-1-1-1-1			29.3	0	0		HAWFSVII	HAWFSVII		HAWFSVII	HAWFSVII								HAWFSVII	HAWFSVII			HAWFSVII	HAWFSVII																							HAWFSVII
TDP039	AWFSVIIP	0-0-0-0-0-0-0-0-0-0-0-0-0-1-0-0-0-0-0-0-0-0-0-0-0-0-0-0-0-0-0-0-0-0-0-0-0-0-0-0-0-0-0-0-0-0-1-1-0-1-1-0			17.4	0	0															AWFSVIIP
--------
TDP039	HAWFSVIIPNLGDG	1-1-1-1-1-1-1-1-1-1-1-1-1-1-1-1-1-1-1-1-1-1-1-1-1-1-1-1-1-1-1-1-1-1-1-1-1-1-1-1-1-1-1-0-1-1-1-1-1-1-1-1	3 times in 3 NECs		33.5	34	0
TDP039	hawf^SVIIPNLGDG	1-1-0-1-1-0-0-0-0-0-0-0-1-1-0-0-1-1-0-0-0-0-0-0-0-0-0-0-0-0-0-0-0-0-0-0-0-0-0-0-1-1-1-1-1-1-1-1-1-1-1-1			29.3	0	0
TDP039	HAWFSVIIPNLGD^g	0-1-0-0-0-0-0-1-1-0-1-1-1-0-1-1-0-0-0-1-0-0-0-0-0-0-0-0-0-0-0-0-1-1-1-0-0-0-0-1-1-1-0-0-1-1-0-0-1-1-0-0	1 times in 3 NECs		29.1	21.4	0
TDP039	haw^FSVIIPNLGDG	0-0-0-0-1-0-0-0-0-0-0-0-0-0-0-0-0-0-0-0-0-0-0-0-0-0-0-0-0-0-0-0-0-0-0-0-0-0-0-0-0-1-1-1-0-0-1-1-0-0-1-1			26.2	0	0
TDP039	hawfs^VIIPNLGDG	0-0-0-0-0-0-0-0-0-0-0-0-0-1-0-0-0-0-0-0-0-0-0-0-0-0-0-0-0-0-0-0-0-0-0-0-0-0-0-0-0-0-0-0-0-0-1-1-0-1-1-0			17.4	0	0
TDP039	HAWFSVIIP^nlgdg	0-0-0-0-0-0-0-0-0-0-0-0-0-0-0-0-0-0-0-0-0-0-0-0-0-0-0-0-0-0-0-0-0-0-0-0-0-0-0-0-0-1-0-0-1-1-1-0-0-1-0-0			17.9	0	0
TDP040	HKMETNIT	0-0-0-0-0-0-0-0-0-0-0-0-0-0-0-0-0-0-0-0-0-0-0-0-0-0-0-0-0-0-0-0-0-0-0-0-0-0-0-0-0-0-0-0-0-0-1-1-0-0-1-1			17.7	0	0
TDP040	KMETNITS	0-0-0-0-0-0-0-0-0-0-0-0-0-0-0-0-0-0-0-0-0-0-0-0-0-0-0-0-0-0-0-0-0-0-0-0-0-0-0-0-0-0-0-0-0-0-0-0-0-0-0-1			15	0	0
TDP040	METNITSG	0-0-0-0-0-0-0-0-0-0-0-0-0-0-0-0-0-0-0-0-0-0-0-0-0-0-0-0-0-0-0-0-0-0-0-0-0-0-0-0-0-0-0-1-0-0-0-0-0-0-0-1			16	0	0
TDP040	TNITSGXX	0-0-0-0-0-0-0-0-0-0-0-0-0-0-0-0-0-0-0-0-0-0-0-0-0-0-0-0-0-0-0-0-0-0-0-0-0-0-0-0-0-0-0-0-0-0-1-0-0-0-0-0			15.8	0	0
TDP040	XXXAAPYH	0-0-0-0-0-0-0-0-0-0-0-0-0-0-0-0-0-0-0-0-0-0-0-0-0-0-0-0-0-0-0-0-0-0-0-0-0-0-0-0-0-0-0-0-0-0-1-1-0-0-0-0			18.9	0	0
TDP040	AAPYHKME	0-0-0-0-0-0-0-0-0-0-0-0-0-0-0-0-0-0-0-0-0-0-0-0-0-0-0-0-0-0-0-0-0-0-0-0-0-0-0-0-1-1-0-1-0-0-1-1-0-1-1-1			21.1	0	0																																										AAPYHKME
TDP040	APYHKMET	0-0-0-0-0-0-0-0-0-0-0-0-0-0-0-0-0-0-0-0-0-0-0-0-0-0-0-0-0-0-0-0-0-0-0-0-0-0-0-0-0-0-1-1-0-0-1-0-0-1-1-1			23.7	0	0
TDP040	XXAAPYHK	0-1-0-0-0-0-0-1-0-0-1-0-0-0-1-0-0-0-0-0-0-0-0-0-0-0-0-0-0-0-0-0-0-0-0-0-0-0-0-0-0-0-0-0-0-0-0-0-1-0-0-0			22.2	0	0			XXAAPYHK						XXAAPYHK			XXAAPYHK				XXAAPYHK
TDP040	XAAPYHKM	0-0-0-0-0-0-0-0-0-0-0-0-0-0-0-0-0-0-0-0-0-0-0-0-0-0-0-0-0-0-0-0-0-0-0-0-0-0-0-0-0-0-0-1-0-0-0-1-0-1-1-0			19.6	0	0
--------
TDP040	aa^PYHKMETNITSG	0-1-0-0-0-0-0-1-0-0-1-0-0-0-1-0-0-0-0-0-0-0-0-0-0-0-0-0-0-0-0-0-0-0-0-0-0-0-0-0-0-0-0-0-0-0-0-0-1-0-0-0			22.2	0	0
TDP040	aapy^HKMETNITSG	0-0-0-0-0-0-0-0-0-0-0-0-0-0-0-0-0-0-0-0-0-0-0-0-0-0-0-0-0-0-0-0-0-0-0-0-0-0-0-0-1-1-0-1-0-0-1-1-0-1-1-1			21.1	0	0
TDP040	aapyh^KMETNITSG	0-0-0-0-0-0-0-0-0-0-0-0-0-0-0-0-0-0-0-0-0-0-0-0-0-0-0-0-0-0-0-0-0-0-0-0-0-0-0-0-0-0-1-1-0-0-1-0-0-1-1-1			23.7	0	0
TDP040	a^APYHKMETNITSG	0-0-0-0-0-0-0-0-0-0-0-0-0-0-0-0-0-0-0-0-0-0-0-0-0-0-0-0-0-0-0-0-0-0-0-0-0-0-0-0-0-0-0-0-0-0-1-1-0-0-0-0			18.9	0	0
TDP040	AAPYHKME^tnitsg	0-0-0-0-0-0-0-0-0-0-0-0-0-0-0-0-0-0-0-0-0-0-0-0-0-0-0-0-0-0-0-0-0-0-0-0-0-0-0-0-0-0-0-0-0-0-1-1-0-0-1-1			17.7	0	0
TDP040	aap^YHKMETNITSG	0-0-0-0-0-0-0-0-0-0-0-0-0-0-0-0-0-0-0-0-0-0-0-0-0-0-0-0-0-0-0-0-0-0-0-0-0-0-0-0-0-0-0-0-0-0-0-1-0-1-1-0			19.6	0	0
TDP040	AAPYHKMETNITSG	1-1-1-1-1-1-0-1-0-0-1-0-0-0-1-1-0-1-1-1-1-1-0-1-0-0-0-1-1-1-0-0-1-1-0-0-0-0-0-1-1-0-0-0-1-0-1-0-1-1-1-1	1 times in 3 NECs		22.6	15.1	0
TDP040	AAPYHKMETN^itsg	0-0-0-0-0-0-0-0-0-0-0-0-0-0-0-0-0-0-0-0-0-0-0-0-0-0-0-0-0-0-0-0-0-0-0-0-0-0-0-0-0-0-0-0-0-0-0-0-0-0-0-1			15.5	0	0
TDP040	AAPYHKMET^nitsg	0-0-0-0-0-0-0-0-0-0-0-0-0-0-0-0-0-0-0-0-0-0-0-0-0-0-0-0-0-0-0-0-0-0-0-0-0-0-0-0-0-0-0-0-0-0-0-0-0-0-0-1			15	0	0
TDP040	aap^YHKMETN^itsg	0-0-0-0-0-0-0-0-0-0-0-0-0-0-0-0-0-0-0-0-0-0-0-0-0-0-0-0-0-0-0-0-0-0-0-0-0-0-0-0-0-0-0-1-0-0-0-0-0-0-0-0			16	0	0
TDP040	AAPYHKMETNIT^sg	0-0-0-0-0-0-0-0-0-0-0-0-0-0-0-0-0-0-0-0-0-0-0-0-0-0-0-0-0-0-0-0-0-0-0-0-0-0-0-0-0-0-0-0-0-0-1-0-0-0-0-0			15.8	0	0
TDP041	XNAKHYSR	0-0-0-0-0-0-0-0-0-0-0-0-0-0-0-0-0-0-0-0-0-0-0-0-0-0-0-0-0-0-0-0-0-0-0-0-0-0-0-0-1-1-0-0-0-0-0-0-1-1-1-0			23	0	0																																										XNAKHYSR
TDP041	RQWWEMFG	0-0-0-0-0-0-0-0-0-0-0-0-0-0-0-0-0-0-0-0-0-0-0-0-0-0-0-0-0-0-0-0-0-0-0-0-0-0-0-0-1-1-0-0-0-0-0-0-1-1-1-0			19.4	0	0																																										RQWWEMFG
TDP041	SRQWWEMF	0-0-1-1-1-0-0-0-0-0-0-0-0-1-0-0-0-0-0-0-0-0-0-0-0-0-0-0-0-0-0-0-0-0-0-0-0-0-0-0-0-0-0-0-0-0-1-0-0-0-1-0			25.3	0	0				SRQWWEMF	SRQWWEMF	SRQWWEMF									SRQWWEMF
TDP041	KHYSRQWW	0-0-0-0-0-0-0-0-0-0-0-0-0-0-0-0-0-0-0-0-0-0-0-0-0-0-0-0-0-0-0-0-0-0-0-0-0-0-0-0-0-1-0-0-0-0-0-0-0-0-0-0			15.7	0	0
TDP041	AKHYSRQW	0-0-0-0-0-0-0-0-0-0-0-0-0-0-0-0-0-0-0-0-0-0-0-0-0-0-0-0-0-0-0-0-0-0-0-0-0-0-0-0-0-0-0-0-1-0-0-0-0-1-0-0			15.3	0	0
TDP041	NAKHYSRQ	0-0-0-0-0-0-0-0-0-0-0-0-0-0-0-0-0-0-0-0-0-0-0-0-0-0-0-0-0-0-0-0-0-0-0-0-0-0-0-0-0-0-0-0-0-1-0-0-0-1-0-0			17.4	0	0
--------
TDP041	NAKHYSRQWWEMFG	0-0-0-0-0-1-0-1-1-0-0-1-0-0-1-0-0-1-0-0-0-0-0-0-0-0-0-0-1-0-0-0-0-1-0-1-0-0-1-1-1-0-0-0-0-0-0-0-0-1-0-0			29.2	0	0
TDP041	nak^HYSRQWWEMFG	0-0-0-0-0-0-0-0-0-0-0-0-0-0-0-0-0-0-0-0-0-0-0-0-0-0-0-0-0-0-0-0-0-0-0-0-0-0-0-0-1-1-0-0-0-0-0-0-1-1-0-0			23	0	0
TDP041	nakhys^RQWWEMFG	0-0-0-0-0-0-0-0-0-0-0-0-0-0-0-0-0-0-0-0-0-0-0-0-0-0-0-0-0-0-0-0-0-0-0-0-0-0-0-0-0-1-0-0-0-0-0-0-0-0-0-0			15.7	0	0
TDP041	nakh^YSRQWWEMFG	0-0-0-0-0-0-0-0-0-0-0-0-0-0-0-0-0-0-0-0-0-0-0-0-0-0-0-0-0-0-0-0-0-0-0-0-0-0-0-0-0-0-0-0-0-1-0-0-0-1-0-0			17.4	0	0
TDP041	NAKHYSRQWW^emfg	0-0-0-0-0-0-0-0-0-0-0-0-0-0-0-0-0-0-0-0-0-0-0-0-0-0-0-0-0-0-0-0-0-0-0-0-0-0-0-0-1-1-0-0-0-0-0-0-1-1-0-0			19.4	0	0
TDP041	NAKHYSRQW^wemfg	0-0-1-1-1-0-0-0-0-0-0-0-0-1-0-0-0-0-0-0-0-0-0-0-0-0-0-0-0-0-0-0-0-0-0-0-0-0-0-0-0-0-0-0-0-0-1-0-0-0-1-0			25.3	0	0
TDP041	nakhy^SRQWWEMFG	0-0-0-0-0-0-0-0-0-0-0-0-0-0-0-0-0-0-0-0-0-0-0-0-0-0-0-0-0-0-0-0-0-0-0-0-0-0-0-0-0-0-0-0-1-0-0-0-0-1-0-0			15.3	0	0
TDP041	nak^HYSRQWW^emfg	0-0-0-0-0-0-0-0-0-0-0-0-0-0-0-0-0-0-0-0-0-0-0-0-0-0-0-0-0-0-0-0-0-0-0-0-0-0-0-0-0-0-0-0-0-0-0-0-0-0-1-0			15.9	0	0
TDP042	TARWNDVD	0-0-0-0-0-0-0-0-0-0-0-0-0-0-0-0-0-0-0-0-0-0-0-0-0-0-0-0-0-0-0-0-0-0-0-0-0-0-0-0-1-1-1-0-0-1-1-1-1-1-1-1			22.2	0	0																																										TARWNDVD
TDP042	ARWNDVDG	0-0-0-0-0-0-0-0-1-1-0-0-0-0-0-0-0-0-0-0-0-0-0-0-0-0-0-0-0-0-0-0-0-0-0-0-0-0-0-0-0-0-0-0-0-0-0-0-0-0-0-0			19.2	0	0										ARWNDVDG	ARWNDVDG
TDP042	RWNDVDGG	0-0-0-0-0-0-0-0-0-0-0-0-0-0-0-0-0-0-0-0-0-0-0-0-0-0-0-0-0-0-0-0-0-0-0-0-0-0-0-0-1-0-0-0-0-0-1-1-1-1-1-0			28.2	0	0																																										RWNDVDGG
TDP042	NDVDGGXX	1-1-1-1-1-1-1-1-1-1-1-1-1-1-1-1-1-1-0-1-0-0-0-0-0-0-1-0-0-0-1-1-0-1-1-0-0-1-0-1-1-1-0-0-1-1-1-1-1-1-0-0	3 times in 3 NECs		32.7	18.8	0		NDVDGGXX	NDVDGGXX	NDVDGGXX	NDVDGGXX	NDVDGGXX	NDVDGGXX	NDVDGGXX	NDVDGGXX	NDVDGGXX	NDVDGGXX	NDVDGGXX	NDVDGGXX	NDVDGGXX	NDVDGGXX	NDVDGGXX	NDVDGGXX	NDVDGGXX	NDVDGGXX		NDVDGGXX							NDVDGGXX				NDVDGGXX	NDVDGGXX		NDVDGGXX	NDVDGGXX			NDVDGGXX		NDVDGGXX	NDVDGGXX
TDP042	DVDGGXXX	0-0-0-1-1-0-1-1-0-1-0-1-1-0-0-0-1-0-0-0-0-0-0-0-0-0-0-0-0-0-0-0-0-0-0-0-0-0-0-0-0-0-0-0-0-0-0-0-0-0-0-0			27.4	0	0					DVDGGXXX	DVDGGXXX		DVDGGXXX	DVDGGXXX		DVDGGXXX		DVDGGXXX	DVDGGXXX				DVDGGXXX
TDP042	XPASQTAR	0-0-0-0-0-0-0-0-0-0-0-0-0-0-0-0-0-0-0-0-0-0-0-0-0-0-0-0-0-0-0-0-0-0-0-0-0-0-0-0-0-0-0-0-0-0-0-1-0-0-0-0			17.7	0	0
TDP042	SQTARWND	0-0-0-0-0-0-0-0-0-0-0-0-0-0-0-0-0-0-0-0-0-0-0-0-0-0-0-0-0-0-0-0-0-0-0-0-0-0-0-0-0-0-0-0-0-0-1-1-0-0-0-0			18	0	0
TDP042	XXPASQTA	0-0-0-0-0-0-0-0-0-0-0-0-1-0-0-1-0-0-0-0-0-0-0-0-0-0-0-0-0-0-0-0-0-0-0-0-0-0-0-0-1-0-0-0-0-0-1-1-1-1-1-0			21.6	0	0														XXPASQTA			XXPASQTA																									XXPASQTA
TDP042	PASQTARW	0-0-0-0-0-0-0-0-0-0-0-0-0-0-0-0-0-0-0-0-0-0-0-0-0-0-0-0-0-0-0-0-0-0-0-0-0-0-0-0-0-0-1-0-0-0-1-1-0-1-0-0			19.7	0	0
--------
TDP042	PASQTARWNDVDGG	1-1-1-1-1-1-1-1-1-1-1-1-1-1-1-1-1-1-1-1-1-1-1-1-1-1-1-1-1-1-1-1-1-1-1-1-1-1-1-1-1-1-1-0-1-1-1-1-1-1-1-0	3 times in 3 NECs		37.9	35.6	0
TDP042	PASQTARWNDVD^gg	1-1-1-1-1-1-1-1-1-1-1-1-1-1-1-1-1-1-0-1-0-0-0-0-0-0-1-0-0-0-1-1-0-1-1-0-0-1-0-1-1-1-0-0-1-1-1-1-1-1-0-0	3 times in 3 NECs		32.7	18.8	0
TDP042	PASQTARWND^vdgg	0-0-0-0-0-0-0-0-0-0-0-0-0-0-0-0-0-0-0-0-0-0-0-0-0-0-0-0-0-0-0-0-0-0-0-0-0-0-0-0-1-0-0-0-0-0-1-1-1-1-1-0			28.2	0	0
TDP042	PASQTARWNDVDG^g	0-0-0-1-1-0-1-1-0-1-0-1-1-0-0-0-1-0-0-0-0-0-0-0-0-0-0-0-0-0-0-0-0-0-0-0-0-0-0-0-0-0-0-0-0-0-0-0-0-0-0-0			27.4	0	0
TDP042	pa^SQTARWNDVDGG	0-0-0-0-0-0-0-0-0-0-0-0-1-0-0-1-0-0-0-0-0-0-0-0-0-0-0-0-0-0-0-0-0-0-0-0-0-0-0-0-1-0-0-0-0-0-1-1-1-1-1-0			21.6	0	0
TDP042	PASQTARWN^dvdgg	0-0-0-0-0-0-0-0-1-1-0-0-0-0-0-0-0-0-0-0-0-0-0-0-0-0-0-0-0-0-0-0-0-0-0-0-0-0-0-0-0-0-0-0-0-0-0-0-0-0-0-0			19.2	0	0
TDP042	PASQTARW^ndvdgg	0-0-0-0-0-0-0-0-0-0-0-0-0-0-0-0-0-0-0-0-0-0-0-0-0-0-0-0-0-0-0-0-0-0-0-0-0-0-0-0-1-1-1-0-0-1-1-1-1-1-1-1			22.2	0	0
TDP042	pas^QTARWNDVDGG	0-0-0-0-0-0-0-0-0-0-0-0-0-0-0-0-0-0-0-0-0-0-0-0-0-0-0-0-0-0-0-0-0-0-0-0-0-0-0-0-0-0-0-0-0-0-0-1-0-0-0-0			17.7	0	0
TDP042	pasqta^RWNDVDGG	0-0-0-0-0-0-0-0-0-0-0-0-0-0-0-0-0-0-0-0-0-0-0-0-0-0-0-0-0-0-0-0-0-0-0-0-0-0-0-0-0-0-0-0-0-0-1-1-0-0-0-0			18	0	0
TDP042	pasq^TARWNDVDGG	0-0-0-0-0-0-0-0-0-0-0-0-0-0-0-0-0-0-0-0-0-0-0-0-0-0-0-0-0-0-0-0-0-0-0-0-0-0-0-0-0-0-1-0-0-0-1-1-0-1-0-0			19.7	0	0
TDP043	RSAFAEMW	0-0-0-1-1-0-0-0-0-0-0-0-0-0-0-0-0-0-0-0-0-0-0-0-0-0-0-0-0-0-0-0-0-0-0-0-0-0-0-0-1-1-1-1-1-0-1-1-0-0-1-1			19.8	0	0					RSAFAEMW	RSAFAEMW																																				RSAFAEMW
TDP043	KARSAFAE	0-0-0-0-0-0-0-0-0-0-0-0-0-0-0-0-0-0-0-0-0-0-0-0-0-0-0-0-0-0-0-0-0-0-0-0-0-0-0-0-0-1-0-1-0-0-1-1-0-0-1-1			26.9	0	0
TDP043	XXXKARSA	0-1-0-0-0-1-0-1-0-0-1-1-0-0-1-1-1-1-0-0-0-1-0-0-0-0-0-0-0-0-0-0-0-0-0-0-0-1-0-1-1-1-1-0-1-0-1-1-1-0-0-0	1 times in 3 NECs		25	21.9	0			XXXKARSA				XXXKARSA		XXXKARSA			XXXKARSA	XXXKARSA			XXXKARSA	XXXKARSA	XXXKARSA	XXXKARSA				XXXKARSA																XXXKARSA		XXXKARSA	XXXKARSA
TDP043	ARSAFAEM	0-0-0-0-0-0-0-0-0-0-0-0-0-0-0-0-0-0-0-0-0-0-0-0-0-0-0-0-0-0-0-0-0-0-0-0-0-0-0-0-0-1-1-1-0-1-1-2-0-1-1-1			26.8	0	0
TDP043	WPDHGXXX	0-0-0-0-0-0-0-0-0-0-0-0-0-0-0-0-0-0-0-0-0-0-0-0-0-0-0-0-0-0-0-0-0-0-0-0-0-0-0-1-0-0-1-0-0-0-0-1-0-0-0-0			19.6	0	0																																									WPDHGXXX
TDP043	FAEMWPDH	0-0-1-0-0-0-0-0-0-0-0-0-0-0-0-0-0-0-0-0-0-0-0-0-0-0-0-0-0-0-0-0-0-0-0-0-0-0-0-0-0-0-0-0-0-0-0-0-0-0-0-0			15.7	0	0				FAEMWPDH
TDP043	AEMWPDHG	0-0-0-0-0-0-0-0-0-0-0-0-0-0-0-0-0-0-0-0-0-0-0-0-0-0-0-0-0-0-0-0-0-0-0-0-0-0-0-0-0-0-0-0-0-0-0-0-0-1-0-0			15.4	0	0
TDP043	EMWPDHGX	0-0-0-0-0-0-0-0-0-0-0-0-0-0-0-0-0-0-0-0-0-0-0-0-0-0-0-0-0-0-0-0-0-0-0-0-0-0-0-0-0-0-0-0-0-0-1-0-0-1-0-0			16.8	0	0
TDP043	MWPDHGXX	0-0-0-0-0-0-0-0-0-0-0-0-0-0-0-0-0-0-0-1-0-0-0-0-0-0-0-0-0-0-0-0-0-0-0-0-0-0-0-0-1-0-0-0-0-0-0-0-1-1-0-0			23.2	0	0																					MWPDHGXX																					MWPDHGXX
TDP043	XXKARSAF	0-0-0-0-0-0-0-0-0-0-0-0-0-0-0-0-0-0-0-0-0-0-0-0-0-0-0-0-0-0-0-0-0-0-0-0-0-0-0-0-1-1-1-0-1-1-1-1-1-0-0-0			24.2	0	0																																										XXKARSAF
TDP043	XKARSAFA	0-0-0-0-0-0-0-0-0-0-0-0-0-0-0-0-0-0-0-0-0-0-0-0-0-0-0-0-0-0-0-0-0-0-0-0-0-0-0-0-1-1-2-1-0-1-1-1-0-1-1-1			34	0	0																																										XKARSAFA
--------
TDP043	kar^SAFAEMWPDHG	0-0-0-0-0-0-0-0-0-0-0-0-0-0-0-0-0-0-0-0-0-0-0-0-0-0-0-0-0-0-0-0-0-0-0-0-0-0-0-0-1-1-1-1-0-1-1-1-0-1-1-1			34	0	0
TDP043	k^ARSAFAEMWPDHG	0-1-0-0-0-1-0-1-0-0-1-1-0-0-1-1-1-1-0-0-0-1-0-0-0-0-0-0-0-0-0-0-0-0-0-0-0-1-0-1-1-1-1-0-1-0-1-1-1-0-0-0	1 times in 3 NECs		25	21.9	0
TDP043	KARSAFAEMWPDHG	1-1-1-1-1-1-1-1-1-1-1-1-1-1-1-1-1-1-1-1-1-1-1-1-1-1-1-1-1-1-1-1-1-1-1-1-1-1-1-1-1-1-0-1-1-1-1-1-1-1-0-0	3 times in 3 NECs		35.6	32.7	0
TDP043	ka^RSAFAEMWPDHG	0-0-0-0-0-0-0-0-0-0-0-0-0-0-0-0-0-0-0-0-0-0-0-0-0-0-0-0-0-0-0-0-0-0-0-0-0-0-0-0-1-1-1-0-1-1-1-1-1-0-0-0			24.2	0	0
TDP043	kars^AFAEMWPDHG	0-0-0-0-0-0-0-0-0-0-0-0-0-0-0-0-0-0-0-0-0-0-0-0-0-0-0-0-0-0-0-0-0-0-0-0-0-0-0-0-0-1-0-1-0-0-1-1-0-0-1-1			26.9	0	0
TDP043	karsa^FAEMWPDHG	0-0-0-0-0-0-0-0-0-0-0-0-0-0-0-0-0-0-0-0-0-0-0-0-0-0-0-0-0-0-0-0-0-0-0-0-0-0-0-0-0-1-1-1-0-1-1-1-0-1-1-1			26.8	0	0
TDP043	KARSAFAEMWPDH^g	0-0-0-0-0-0-0-0-0-0-0-0-0-0-0-0-0-0-0-0-0-0-0-0-0-0-0-0-0-0-0-0-0-0-0-0-0-0-0-1-0-0-0-0-0-0-0-0-0-0-0-0			19.6	0	0
TDP043	karsaf^AEMWPDHG	0-0-0-1-1-0-0-0-0-0-0-0-0-0-0-0-0-0-0-0-0-0-0-0-0-0-0-0-0-0-0-0-0-0-0-0-0-0-0-0-1-1-1-1-1-0-1-1-0-0-1-1			19.8	0	0
TDP043	karsa^FAEMWPDH^g	0-0-0-0-0-0-0-0-0-0-0-0-0-0-0-0-0-0-0-0-0-0-0-0-0-0-0-0-0-0-0-0-0-0-0-0-0-0-0-0-0-0-0-0-0-0-0-1-0-0-0-0			16.8	0	0
TDP043	KARSAFAEMWP^dhg	0-0-0-0-0-0-0-0-0-0-0-0-0-0-0-0-0-0-0-0-0-0-0-0-0-0-0-0-0-0-0-0-0-0-0-0-0-0-0-0-0-0-0-0-0-0-1-0-0-1-0-0			16.8	0	0
TDP043	kar^SAFAEMWPDH^g	0-0-0-0-0-0-0-0-0-0-0-0-0-0-0-0-0-0-0-0-0-0-0-0-0-0-0-0-0-0-0-0-0-0-0-0-0-0-0-0-0-0-1-0-0-0-0-0-0-0-0-0			15	0	0
TDP043	KARSAFAEMWPD^hg	0-0-0-0-0-0-0-0-0-0-0-0-0-0-0-0-0-0-0-1-0-0-0-0-0-0-0-0-0-0-0-0-0-0-0-0-0-0-0-0-1-0-0-0-0-0-0-0-1-1-0-0			23.2	0	0
TDP043	KARSAFAEMW^pdhg	0-0-0-0-0-0-0-0-0-0-0-0-0-0-0-0-0-0-0-0-0-0-0-0-0-0-0-0-0-0-0-0-0-0-0-0-0-0-0-0-0-0-0-0-0-0-0-0-0-1-0-0			15.4	0	0
TDP043	KARSAFAEM^wpdhg	0-0-1-0-0-0-0-0-0-0-0-0-0-0-0-0-0-0-0-0-0-0-0-0-0-0-0-0-0-0-0-0-0-0-0-0-0-0-0-0-0-0-0-0-0-0-0-0-0-0-0-0			15.7	0	0
TDP044	XXXGASTS	0-0-0-0-0-0-0-0-0-0-0-0-0-0-0-0-0-0-0-0-0-0-0-0-0-0-0-0-0-0-0-0-0-0-0-0-0-0-0-0-0-1-0-0-0-1-0-0-0-0-0-0			19.1	0	0
TDP044	SPHMIWAK	0-0-0-0-0-0-0-0-0-0-0-0-0-0-0-0-0-0-0-0-0-0-0-0-0-0-0-0-0-0-0-0-0-0-0-0-0-0-0-0-0-0-0-1-0-0-1-1-0-0-1-1			15.5	0	0
TDP044	PHMIWAKP	0-0-0-0-0-0-0-0-0-0-0-0-0-0-0-0-0-0-0-0-0-0-0-0-0-0-0-0-0-0-0-0-0-0-0-0-0-0-0-0-1-0-1-0-0-0-2-1-0-1-1-1			20.7	0	0																																										PHMIWAKP
TDP044	HMIWAKPG	0-0-0-0-0-0-0-0-0-0-0-0-0-0-0-0-0-0-0-0-0-0-0-0-0-0-0-0-0-0-0-0-0-0-0-0-0-0-0-0-1-0-0-0-0-0-1-0-0-1-1-0			17.6	0	0																																										HMIWAKPG
TDP044	MIWAKPGX	0-0-0-0-0-0-0-0-0-0-0-0-0-0-0-0-0-0-0-0-0-0-0-0-0-0-0-0-0-0-0-0-0-0-0-0-0-0-0-0-0-1-1-0-0-0-0-0-0-0-1-0			17.1	0	0
TDP044	WAKPGXXX	0-0-0-0-0-0-0-0-0-0-0-0-0-0-0-0-0-0-0-0-0-0-0-0-0-0-0-0-0-0-0-0-0-0-0-0-0-0-0-0-0-1-3-0-0-1-2-0-0-1-1-0			24.4	0	0
TDP044	TSPHMIWA	0-0-0-0-0-0-0-0-0-0-0-0-0-0-0-0-0-0-0-0-0-0-0-0-0-0-0-0-0-0-0-0-0-0-0-0-0-0-0-0-0-0-0-0-0-1-0-0-0-0-0-0			15.4	0	0
TDP044	XXGASTSP	1-1-0-1-1-1-0-1-0-0-1-0-0-1-1-1-1-0-1-1-1-0-0-1-0-0-1-1-1-1-1-1-0-0-1-0-0-1-0-0-1-1-2-0-1-1-3-0-1-1-1-0	3 times in 3 NECs		25.5	18.5	0		XXGASTSP	XXGASTSP		XXGASTSP	XXGASTSP	XXGASTSP		XXGASTSP			XXGASTSP			XXGASTSP	XXGASTSP	XXGASTSP	XXGASTSP		XXGASTSP	XXGASTSP	XXGASTSP			XXGASTSP			XXGASTSP	XXGASTSP	XXGASTSP	XXGASTSP	XXGASTSP	XXGASTSP			XXGASTSP			XXGASTSP			XXGASTSP
TDP044	XGASTSPH	0-0-0-0-0-0-0-0-0-0-0-0-0-0-0-0-0-0-0-0-0-0-0-0-0-0-1-1-0-0-0-0-0-0-0-0-0-0-0-0-1-1-2-0-0-0-1-0-1-1-1-0			22.4	0	0																												XGASTSPH	XGASTSPH													XGASTSPH
--------
TDP044	GASTSPHMIWAKPG	1-1-1-1-1-1-1-1-1-1-1-1-1-1-1-1-1-1-1-1-1-1-1-1-1-1-1-1-1-1-1-1-1-1-1-1-1-1-1-1-1-1-1-0-1-1-1-0-1-1-1-0	3 times in 3 NECs		27.6	26.2	0
TDP044	ga^STSPHMIWAKPG	1-1-0-1-1-1-0-1-0-0-1-0-0-1-1-1-1-0-1-1-1-0-0-1-0-0-1-1-1-1-1-1-0-0-1-0-0-1-0-0-1-1-1-0-1-1-1-0-1-1-1-0	3 times in 3 NECs		25.5	18.5	0
TDP044	GASTSPHMIWAKP^g	0-0-0-0-0-0-0-0-0-0-0-0-0-0-0-0-0-0-0-0-0-0-0-0-0-0-0-0-0-0-0-0-0-0-0-0-0-0-0-0-0-1-1-0-0-1-1-0-0-1-1-0			24.4	0	0
TDP044	gas^TSPHMIWAKPG	0-0-0-0-0-0-0-0-0-0-0-0-0-0-0-0-0-0-0-0-0-0-0-0-0-0-1-1-0-0-0-0-0-0-0-0-0-0-0-0-1-1-1-0-0-0-1-0-1-1-1-0			22.4	0	0
TDP044	gas^TSPHMIWAKP^g	0-0-0-0-0-0-0-0-0-0-0-0-0-0-0-0-0-0-0-0-0-0-0-0-0-0-0-0-0-0-0-0-0-0-0-0-0-0-0-0-0-0-1-0-0-0-0-0-0-0-0-0			20.1	0	0
TDP044	GASTSPHMI^wakpg	0-0-0-0-0-0-0-0-0-0-0-0-0-0-0-0-0-0-0-0-0-0-0-0-0-0-0-0-0-0-0-0-0-0-0-0-0-0-0-0-1-0-1-0-0-0-1-1-0-1-1-1			20.7	0	0
TDP044	g^ASTSPHMIWAKPG	0-0-0-0-0-0-0-0-0-0-0-0-0-0-0-0-0-0-0-0-0-0-0-0-0-0-0-0-0-0-0-0-0-0-0-0-0-0-0-0-0-1-0-0-0-1-0-0-0-0-0-0			19.1	0	0
TDP044	GASTSPHMIW^akpg	0-0-0-0-0-0-0-0-0-0-0-0-0-0-0-0-0-0-0-0-0-0-0-0-0-0-0-0-0-0-0-0-0-0-0-0-0-0-0-0-1-0-0-0-0-0-1-0-0-1-1-0			17.6	0	0
TDP044	ga^STSPHMIWAKP^g	0-0-0-0-0-0-0-0-0-0-0-0-0-0-0-0-0-0-0-0-0-0-0-0-0-0-0-0-0-0-0-0-0-0-0-0-0-0-0-0-0-0-1-0-0-0-1-0-0-0-0-0			16.3	0	0
TDP044	ga^STSPHMI^wakpg	0-0-0-0-0-0-0-0-0-0-0-0-0-0-0-0-0-0-0-0-0-0-0-0-0-0-0-0-0-0-0-0-0-0-0-0-0-0-0-0-0-0-0-0-0-0-1-0-0-0-0-0			15.2	0	0
TDP044	GASTSPHM^iwakpg	0-0-0-0-0-0-0-0-0-0-0-0-0-0-0-0-0-0-0-0-0-0-0-0-0-0-0-0-0-0-0-0-0-0-0-0-0-0-0-0-0-0-0-1-0-0-1-1-0-0-1-1			15.5	0	0
TDP044	GASTSPHMIWA^kpg	0-0-0-0-0-0-0-0-0-0-0-0-0-0-0-0-0-0-0-0-0-0-0-0-0-0-0-0-0-0-0-0-0-0-0-0-0-0-0-0-0-1-1-0-0-0-0-0-0-0-1-0			17.1	0	0
TDP044	gastsph^MIWAKPG	0-0-0-0-0-0-0-0-0-0-0-0-0-0-0-0-0-0-0-0-0-0-0-0-0-0-0-0-0-0-0-0-0-0-0-0-0-0-0-0-0-0-0-0-0-1-0-0-0-0-0-0			15.4	0	0
TDP045	WLNHYHRK	0-0-0-0-0-0-0-0-0-0-0-0-0-0-0-0-0-0-0-0-1-1-0-0-0-1-0-0-0-0-0-0-0-0-0-0-0-0-0-0-1-1-0-0-0-1-3-1-0-1-0-0			32.1	0	0																						WLNHYHRK	WLNHYHRK				WLNHYHRK															WLNHYHRK
TDP045	LNHYHRKX	0-0-0-0-0-0-0-0-0-0-0-0-0-0-0-0-0-0-0-0-0-1-0-0-0-0-0-0-0-0-0-0-0-0-0-0-0-0-0-0-1-1-0-0-1-1-3-0-1-1-0-0			27.5	0	0																							LNHYHRKX																			LNHYHRKX
TDP045	NHYHRKXX	0-0-0-0-0-0-0-0-0-0-0-0-1-1-0-0-0-0-0-0-0-0-0-0-0-0-0-0-0-1-0-0-0-0-0-0-0-0-0-0-1-2-0-0-1-1-2-0-1-2-1-0			36.1	0	0														NHYHRKXX	NHYHRKXX																NHYHRKXX											NHYHRKXX
TDP045	HYHRKXXX	0-0-0-0-0-0-0-0-0-0-0-1-0-1-0-0-0-0-0-0-0-0-0-0-0-0-0-0-0-0-0-0-0-0-0-0-0-0-0-0-0-1-0-0-1-1-1-0-1-0-0-0			42.9	0	0													HYHRKXXX		HYHRKXXX
TDP045	XXGSQVFS	0-0-0-0-0-0-0-0-0-0-0-0-0-0-0-0-0-0-0-0-0-0-0-0-0-0-0-0-0-0-0-0-0-0-0-0-0-0-0-0-0-0-0-0-1-1-3-0-0-0-0-0			34.9	0	0
TDP045	XXXGSQVF	0-1-0-0-0-1-0-0-0-0-1-1-0-0-0-1-0-0-0-0-0-0-0-0-0-0-1-0-0-0-0-0-0-1-0-0-0-0-0-0-1-1-0-0-1-0-1-0-1-0-0-0			41.5	0	0			XXXGSQVF				XXXGSQVF					XXXGSQVF	XXXGSQVF				XXXGSQVF											XXXGSQVF							XXXGSQVF							XXXGSQVF
TDP045	SQVFSWLN	0-0-0-0-0-0-0-0-0-0-0-0-0-0-0-0-0-0-0-0-0-0-0-0-0-0-0-0-0-0-0-0-0-0-0-0-0-0-0-0-1-2-0-0-0-0-2-0-1-2-2-0			31.6	0	0																																										SQVFSWLN
TDP045	XGSQVFSW	0-0-0-0-0-0-0-0-0-0-0-0-0-0-0-0-0-0-0-0-0-0-0-0-0-0-0-0-0-0-0-0-0-0-0-0-0-0-0-0-0-0-0-0-0-0-1-0-0-0-0-0			19.3	0	0
TDP045	QVFSWLNH	0-0-0-0-0-0-0-0-0-0-0-0-0-0-0-0-0-0-0-0-0-0-0-0-0-0-0-0-0-0-0-0-0-0-0-0-0-0-0-0-0-0-0-0-0-0-1-0-0-1-0-0			16.5	0	0
--------
TDP045	GSQVFSWLNHYHRK	1-1-1-1-1-1-1-1-1-1-1-1-1-1-1-1-1-1-1-1-1-1-1-1-1-1-1-1-1-1-1-1-1-1-1-1-1-1-1-1-1-1-0-0-1-1-1-0-1-1-0-0	3 times in 3 NECs		55.2	54.9	0
TDP045	GSQVFSWLNHYH^rk	0-0-0-0-0-0-0-0-0-0-0-0-1-1-0-0-0-0-0-0-0-0-0-0-0-0-0-0-0-1-0-0-0-0-0-0-0-0-0-0-1-1-0-0-1-1-1-0-1-1-0-0			36.1	0	0
TDP045	GSQVFSWLNHYHR^k	0-0-0-0-0-0-0-0-0-0-0-1-0-1-0-0-0-0-0-0-0-0-0-0-0-0-0-0-0-0-0-0-0-0-0-0-0-0-0-0-0-1-0-0-1-1-1-0-1-0-0-0			42.9	0	0
TDP045	g^SQVFSWLNHYHRK	0-1-0-0-0-1-0-0-0-0-1-1-0-0-0-1-0-0-0-0-0-0-0-0-0-0-1-0-0-0-0-0-0-1-0-0-0-0-0-0-1-1-0-0-1-0-0-0-1-0-0-0			41.5	0	0
TDP045	GSQVFSWLNH^yhrk	0-0-0-0-0-0-0-0-0-0-0-0-0-0-0-0-0-0-0-0-1-1-0-0-0-1-0-0-0-0-0-0-0-0-0-0-0-0-0-0-1-1-0-0-0-1-1-1-0-1-0-0			32.1	0	0
TDP045	GSQVFSWLNHY^hrk	0-0-0-0-0-0-0-0-0-0-0-0-0-0-0-0-0-0-0-0-0-1-0-0-0-0-0-0-0-0-0-0-0-0-0-0-0-0-0-0-1-1-0-0-1-1-1-0-1-1-0-0			27.5	0	0
TDP045	g^SQVFSWLNHY^hrk	0-0-0-0-0-0-0-0-0-0-0-0-0-0-0-0-0-0-0-0-0-0-0-0-0-0-0-0-0-0-0-0-0-0-0-0-0-0-0-0-0-0-0-0-0-0-1-0-0-0-0-0			24	0	0
TDP045	gs^QVFSWLNHYHRK	0-0-0-0-0-0-0-0-0-0-0-0-0-0-0-0-0-0-0-0-0-0-0-0-0-0-0-0-0-0-0-0-0-0-0-0-0-0-0-0-0-0-0-0-1-1-1-0-0-0-0-0			34.9	0	0
TDP045	gs^QVFSWLNHY^hrk	0-0-0-0-0-0-0-0-0-0-0-0-0-0-0-0-0-0-0-0-0-0-0-0-0-0-0-0-0-0-0-0-0-0-0-0-0-0-0-0-0-0-0-0-0-0-1-0-0-0-0-0			22.5	0	0
TDP045	gs^QVFSWLNH^yhrk	0-0-0-0-0-0-0-0-0-0-0-0-0-0-0-0-0-0-0-0-0-0-0-0-0-0-0-0-0-0-0-0-0-0-0-0-0-0-0-0-0-0-0-0-0-0-1-0-0-0-0-0			20.6	0	0
TDP045	gsqvf^SWLNHYHRK	0-0-0-0-0-0-0-0-0-0-0-0-0-0-0-0-0-0-0-0-0-0-0-0-0-0-0-0-0-0-0-0-0-0-0-0-0-0-0-0-1-1-0-0-0-0-1-0-1-1-1-0			31.6	0	0
TDP045	gsqvf^SWLNHYH^rk	0-0-0-0-0-0-0-0-0-0-0-0-0-0-0-0-0-0-0-0-0-0-0-0-0-0-0-0-0-0-0-0-0-0-0-0-0-0-0-0-0-1-0-0-0-0-1-0-0-1-1-0			21.7	0	0
TDP045	gsq^VFSWLNH^yhrk	0-0-0-0-0-0-0-0-0-0-0-0-0-0-0-0-0-0-0-0-0-0-0-0-0-0-0-0-0-0-0-0-0-0-0-0-0-0-0-0-0-0-0-0-0-0-1-0-0-0-0-0			19.3	0	0
TDP045	gsqvfs^WLNHYHRK	0-0-0-0-0-0-0-0-0-0-0-0-0-0-0-0-0-0-0-0-0-0-0-0-0-0-0-0-0-0-0-0-0-0-0-0-0-0-0-0-0-0-0-0-0-0-1-0-0-1-0-0			16.5	0	0
TDP046	ISQWMWEI	0-0-0-0-0-0-0-0-0-0-0-0-0-0-0-0-0-0-0-0-0-0-0-0-0-0-0-0-0-0-0-0-0-0-0-0-0-0-0-0-0-0-0-0-0-1-1-1-0-0-1-0			16.4	0	0
TDP046	SQWMWEIR	0-0-0-1-1-0-0-0-0-0-0-0-0-0-0-0-0-0-0-0-0-0-0-0-0-0-0-0-0-0-0-0-0-0-0-0-0-0-0-0-0-0-0-0-0-0-0-0-0-0-0-0			18	0	0					SQWMWEIR	SQWMWEIR
TDP046	WMWEIRXX	0-0-0-0-0-0-0-0-0-0-0-0-0-0-0-0-0-0-0-1-0-0-0-0-0-0-0-0-0-0-0-0-0-0-0-0-0-0-0-0-1-0-0-0-0-0-2-0-0-0-0-0			18	0	0																					WMWEIRXX																					WMWEIRXX
TDP046	TNKRISQW	0-0-0-0-0-0-0-0-0-0-0-0-0-0-0-0-0-0-0-0-0-0-0-0-0-0-0-0-0-0-0-0-0-0-0-0-0-0-0-0-1-1-0-0-1-1-1-0-1-1-0-0			36.5	0	0																																										TNKRISQW
TDP046	XHTNKRIS	0-0-0-0-0-0-0-0-0-0-0-0-0-0-0-0-0-0-0-0-0-0-0-0-0-0-0-0-0-0-0-0-0-0-0-0-0-0-0-0-0-0-0-0-0-1-0-0-1-0-0-0			25.8	0	0
TDP046	KRISQWMW	0-0-0-0-0-0-0-0-0-0-0-0-0-0-0-0-0-0-0-0-0-0-0-0-0-0-0-0-0-0-0-0-0-0-0-0-0-0-0-0-1-1-1-0-1-1-2-1-1-1-1-0			25	0	0																																										KRISQWMW
TDP046	HTNKRISQ	0-0-0-0-0-0-0-0-0-0-0-0-0-0-0-0-0-0-0-0-0-1-0-0-0-0-0-0-0-0-0-0-0-0-0-0-0-0-0-0-1-0-0-0-0-0-1-0-0-2-0-0			23.7	0	0																							HTNKRISQ																			HTNKRISQ
TDP046	QWMWEIRX	0-0-0-0-0-0-0-0-0-0-0-0-0-0-0-0-0-0-0-0-0-0-0-0-0-0-0-0-0-0-0-0-0-0-0-0-0-0-0-0-0-0-0-0-0-0-0-0-0-1-0-0			15.5	0	0
TDP046	XXXHTNKR	0-0-0-0-0-0-0-0-0-0-0-0-0-0-0-0-0-0-0-0-0-0-0-0-0-0-0-0-0-0-0-0-0-0-0-0-0-0-0-0-0-0-0-0-0-0-0-1-0-0-0-0			16.4	0	0
TDP046	RISQWMWE	0-0-0-1-0-0-0-0-0-0-0-0-0-0-0-0-0-0-0-0-0-0-0-0-0-0-0-0-0-0-0-0-0-0-0-0-0-0-0-0-1-1-1-0-1-1-1-0-1-1-0-0			18.3	0	0					RISQWMWE																																					RISQWMWE
--------
TDP046	HTNKRISQWMWEIR	1-1-1-1-0-1-1-1-1-1-1-1-1-1-1-1-0-0-1-1-1-0-0-0-0-0-1-0-0-0-1-1-1-1-1-1-1-1-1-1-1-1-0-0-1-1-0-0-1-1-0-0	3 times in 3 NECs		41.5	36.6	0
TDP046	htnkr^ISQWMWEIR	0-0-0-0-0-0-0-0-0-0-0-0-0-0-0-0-0-0-0-0-0-0-0-0-0-0-0-0-0-0-0-0-0-0-0-0-0-0-0-0-1-1-0-0-1-1-1-0-1-1-0-0			36.5	0	0
TDP046	HTNKRISQW^mweir	0-0-0-0-0-0-0-0-0-0-0-0-0-0-0-0-0-0-0-0-0-0-0-0-0-0-0-0-0-0-0-0-0-0-0-0-0-0-0-0-0-0-0-0-0-0-0-0-0-0-1-0			15	0	0
TDP046	htnkris^QWMWEIR	0-0-0-0-0-0-0-0-0-0-0-0-0-0-0-0-0-0-0-0-0-0-0-0-0-0-0-0-0-0-0-0-0-0-0-0-0-0-0-0-1-1-1-0-1-1-2-1-1-1-1-0			25	0	0
TDP046	HTNKRISQWM^weir	0-0-0-1-1-0-0-0-0-0-0-0-0-0-0-0-0-0-0-0-0-0-0-0-0-0-0-0-0-0-0-0-0-0-0-0-0-0-0-0-0-0-0-0-0-0-0-0-0-0-0-0			18	0	0
TDP046	h^TNKRISQW^mweir	0-0-0-0-0-0-0-0-0-0-0-0-0-0-0-0-0-0-0-0-0-0-0-0-0-0-0-0-0-0-0-0-0-0-0-0-0-0-0-0-0-0-0-0-0-0-0-1-0-0-0-0			16.4	0	0
TDP046	htnk^RISQWMWEIR	0-0-0-0-0-0-0-0-0-0-0-0-0-0-0-0-0-0-0-0-0-1-0-0-0-0-0-0-0-0-0-0-0-0-0-0-0-0-0-0-1-0-0-0-0-0-0-0-0-1-0-0			23.7	0	0
TDP046	htnkrisq^WMWEIR	0-0-0-1-0-0-0-0-0-0-0-0-0-0-0-0-0-0-0-0-0-0-0-0-0-0-0-0-0-0-0-0-0-0-0-0-0-0-0-0-1-1-1-0-1-1-1-0-1-1-0-0			18.3	0	0
TDP046	htn^KRISQWMWEIR	0-0-0-0-0-0-0-0-0-0-0-0-0-0-0-0-0-0-0-0-0-0-0-0-0-0-0-0-0-0-0-0-0-0-0-0-0-0-0-0-0-0-0-0-0-1-0-0-1-0-0-0			25.8	0	0
TDP046	HTNKRISQWMWE^ir	0-0-0-0-0-0-0-0-0-0-0-0-0-0-0-0-0-0-0-1-0-0-0-0-0-0-0-0-0-0-0-0-0-0-0-0-0-0-0-0-1-0-0-0-0-0-1-0-0-0-0-0			18	0	0
TDP046	htnk^RISQWMW^eir	0-0-0-0-0-0-0-0-0-0-0-0-0-0-0-0-0-0-0-0-0-0-0-0-0-0-0-0-0-0-0-0-0-0-0-0-0-0-0-0-0-0-0-0-0-0-0-0-0-1-0-0			15.5	0	0
TDP046	htnk^RISQWMWE^ir	0-0-0-0-0-0-0-0-0-0-0-0-0-0-0-0-0-0-0-0-0-0-0-0-0-0-0-0-0-0-0-0-0-0-0-0-0-0-0-0-0-0-0-0-0-0-1-0-0-0-0-0			15.6	0	0
TDP046	htnkrisqw^MWEIR	0-0-0-0-0-0-0-0-0-0-0-0-0-0-0-0-0-0-0-0-0-0-0-0-0-0-0-0-0-0-0-0-0-0-0-0-0-0-0-0-0-0-0-0-0-1-1-0-0-0-0-0			15.6	0	0
TDP047	QNSDPKAG	0-0-0-0-0-0-0-0-1-0-0-0-0-0-0-0-0-0-0-0-0-0-0-0-0-0-0-0-0-0-0-0-0-0-0-0-0-0-0-0-0-0-0-0-0-0-0-0-0-0-0-0			16.2	0	0										QNSDPKAG
TDP047	SDPKAGRX	0-0-0-0-0-0-0-0-0-0-0-0-0-0-0-0-0-0-0-0-0-0-0-0-0-0-0-0-0-0-0-0-0-0-0-0-0-0-0-0-0-1-1-0-0-0-0-2-1-1-0-2			31.3	0	0
TDP047	DPKAGRXX	0-0-0-0-0-0-0-0-0-0-0-0-1-1-0-0-0-0-0-0-0-0-0-0-0-0-0-0-0-0-0-0-0-0-0-0-0-0-0-0-0-1-1-1-0-1-2-3-1-1-1-2			30.3	0	0														DPKAGRXX	DPKAGRXX
TDP047	PKAGRXXX	0-0-0-0-1-0-0-0-0-0-0-1-1-0-0-0-0-0-0-0-0-0-0-0-0-0-0-0-0-0-0-0-0-0-0-0-0-0-0-0-0-1-0-0-0-0-3-1-1-1-1-1			26.9	0	0						PKAGRXXX							PKAGRXXX	PKAGRXXX
TDP047	XMSYQWQN	0-0-0-0-0-0-0-0-0-0-0-0-0-0-0-0-0-0-0-0-0-0-0-0-0-0-0-0-0-0-0-0-0-0-0-0-0-0-0-0-1-1-2-2-0-0-1-2-0-1-2-1			35.9	0	0																																										XMSYQWQN
TDP047	XXXMSYQW	0-0-0-0-0-0-0-0-0-0-0-0-0-0-0-0-0-0-1-1-1-0-0-0-0-1-1-0-0-0-0-0-0-0-0-0-0-0-0-0-1-1-1-1-1-1-3-2-0-0-1-1			37.9	0	0																				XXXMSYQW	XXXMSYQW	XXXMSYQW					XXXMSYQW	XXXMSYQW														XXXMSYQW
TDP047	MSYQWQNS	0-0-0-0-1-0-0-0-0-0-0-0-0-0-0-0-0-0-0-0-0-0-0-0-0-0-0-0-0-0-0-0-0-0-0-0-0-0-0-0-1-0-1-1-0-0-1-1-0-0-1-1			29.1	0	0						MSYQWQNS																																				MSYQWQNS
TDP047	XXMSYQWQ	1-1-1-0-1-1-1-1-0-0-1-1-1-0-0-1-1-0-1-1-0-1-0-0-0-1-1-0-0-1-0-0-1-1-0-1-0-1-0-1-1-0-1-2-1-0-3-4-0-1-1-3	1 times in 3 NECs		36.9	17.8	0		XXMSYQWQ	XXMSYQWQ	XXMSYQWQ		XXMSYQWQ	XXMSYQWQ	XXMSYQWQ	XXMSYQWQ			XXMSYQWQ	XXMSYQWQ	XXMSYQWQ			XXMSYQWQ	XXMSYQWQ		XXMSYQWQ	XXMSYQWQ		XXMSYQWQ				XXMSYQWQ	XXMSYQWQ			XXMSYQWQ			XXMSYQWQ	XXMSYQWQ		XXMSYQWQ		XXMSYQWQ		XXMSYQWQ	XXMSYQWQ
--------
TDP047	MSYQWQNSDPKAGR	1-1-1-1-1-1-1-1-1-1-1-1-1-1-1-1-1-1-1-1-1-1-1-1-1-1-1-1-1-1-1-1-1-1-1-1-1-1-1-1-1-1-1-1-1-1-1-1-1-1-1-1	3 times in 3 NECs		42.9	43.1	0
TDP047	m^SYQWQNSDPKAGR	0-0-0-0-0-0-0-0-0-0-0-0-0-0-0-0-0-0-1-1-1-0-0-0-0-1-1-0-0-0-0-0-0-0-0-0-0-0-0-0-1-1-1-1-1-1-1-1-0-0-1-1			37.9	0	0
TDP047	ms^YQWQNSDPKAGR	1-1-1-0-1-1-1-1-0-0-1-1-1-0-0-1-1-0-1-1-0-1-0-0-0-1-1-0-0-1-0-0-1-1-0-1-0-1-0-1-1-0-1-1-1-0-1-1-0-1-1-1	1 times in 3 NECs		36.9	17.8	0
TDP047	msy^QWQNSDPKAGR	0-0-0-0-0-0-0-0-0-0-0-0-0-0-0-0-0-0-0-0-0-0-0-0-0-0-0-0-0-0-0-0-0-0-0-0-0-0-0-0-1-1-2-2-0-0-1-2-0-1-2-1			35.9	0	0
TDP047	MSYQWQNSDPK^agr	0-0-0-0-0-0-0-0-0-0-0-0-0-0-0-0-0-0-0-0-0-0-0-0-0-0-0-0-0-0-0-0-0-0-0-0-0-0-0-0-0-1-1-0-0-0-0-1-1-1-0-1			31.3	0	0
TDP047	MSYQWQNSDPKA^gr	0-0-0-0-0-0-0-0-0-0-0-0-1-1-0-0-0-0-0-0-0-0-0-0-0-0-0-0-0-0-0-0-0-0-0-0-0-0-0-0-0-1-1-0-0-1-0-1-1-1-1-1			30.3	0	0
TDP047	MSYQWQNSDPKAG^r	0-0-0-0-1-0-0-0-0-0-0-1-1-0-0-0-0-0-0-0-0-0-0-0-0-0-0-0-0-0-0-0-0-0-0-0-0-0-0-0-0-1-0-0-0-0-1-0-1-1-1-1			26.9	0	0
TDP047	msyq^WQNSDPKAGR	0-0-0-0-1-0-0-0-0-0-0-0-0-0-0-0-0-0-0-0-0-0-0-0-0-0-0-0-0-0-0-0-0-0-0-0-0-0-0-0-1-0-1-1-0-0-1-1-0-0-1-1			29.1	0	0
TDP047	m^SYQWQNSDPKA^gr	0-0-0-0-0-0-0-0-0-0-0-0-0-0-0-0-0-0-0-0-0-0-0-0-0-0-0-0-0-0-0-0-0-0-0-0-0-0-0-0-0-0-0-0-0-0-1-1-0-0-0-0			22.1	0	0
TDP047	ms^YQWQNSDPKAG^r	0-0-0-0-0-0-0-0-0-0-0-0-0-0-0-0-0-0-0-0-0-0-0-0-0-0-0-0-0-0-0-0-0-0-0-0-0-0-0-0-0-0-0-0-0-0-1-1-0-0-0-0			24.3	0	0
TDP047	ms^YQWQNSDPKA^gr	0-0-0-0-0-0-0-0-0-0-0-0-0-0-0-0-0-0-0-0-0-0-0-0-0-0-0-0-0-0-0-0-0-0-0-0-0-0-0-0-0-0-0-1-0-0-1-1-0-0-0-1			20.7	0	0
TDP047	m^SYQWQNSDPKAG^r	0-0-0-0-0-0-0-0-0-0-0-0-0-0-0-0-0-0-0-0-0-0-0-0-0-0-0-0-0-0-0-0-0-0-0-0-0-0-0-0-0-0-0-0-0-0-1-0-0-0-0-0			17.6	0	0
TDP047	ms^YQWQNSDPK^agr	0-0-0-0-0-0-0-0-0-0-0-0-0-0-0-0-0-0-0-0-0-0-0-0-0-0-0-0-0-0-0-0-0-0-0-0-0-0-0-0-0-0-0-0-0-0-0-1-0-0-0-1			19.1	0	0
TDP047	MSYQWQNSD^pkagr	0-0-0-0-0-0-0-0-1-0-0-0-0-0-0-0-0-0-0-0-0-0-0-0-0-0-0-0-0-0-0-0-0-0-0-0-0-0-0-0-0-0-0-0-0-0-0-0-0-0-0-0			16.2	0	0
TDP048	MRIYIEPE	0-0-0-1-1-0-0-0-0-0-0-0-0-0-0-0-0-0-0-0-0-0-0-0-0-0-0-0-0-0-0-0-0-0-0-0-0-0-0-0-1-2-2-1-1-1-2-2-1-2-2-1			29.1	0	0					MRIYIEPE	MRIYIEPE																																				MRIYIEPE
TDP048	IYIEPETF	0-0-0-0-1-0-0-0-0-0-0-0-0-0-0-0-0-0-0-0-0-0-0-0-0-0-0-0-0-0-0-0-0-0-0-0-0-0-0-0-0-0-0-0-0-0-0-0-0-0-0-0			20.4	0	0						IYIEPETF
TDP048	EPETFDKX	0-0-0-0-1-0-0-0-0-0-0-0-0-0-0-0-0-0-0-0-0-0-0-0-0-0-0-0-0-0-0-0-0-0-0-0-0-0-0-1-0-0-0-0-0-0-1-2-0-0-0-0			19	0	0						EPETFDKX																																			EPETFDKX
TDP048	PETFDKXX	0-0-0-0-0-0-0-0-0-0-0-0-0-0-0-0-0-0-0-0-0-0-0-0-0-0-0-0-0-0-0-0-0-0-0-0-0-0-0-0-0-1-1-2-0-0-2-3-0-0-1-2			24.8	0	0
TDP048	ETFDKXXX	0-0-0-1-0-0-0-0-0-0-0-0-0-0-0-0-0-0-0-0-0-0-0-0-0-0-1-0-0-0-0-0-1-1-0-0-0-0-0-0-0-1-1-0-0-0-1-0-1-1-4-1	2 times in 3 NECs		24.1	25	0					ETFDKXXX																							ETFDKXXX						ETFDKXXX	ETFDKXXX
TDP048	ASMRIYIE	0-0-0-0-0-0-0-0-0-0-0-0-1-0-0-0-0-0-0-0-0-1-0-0-0-0-0-0-0-0-0-0-0-0-0-0-0-0-0-1-1-1-1-2-1-1-1-2-1-1-2-2			36.4	0	0														ASMRIYIE									ASMRIYIE																		ASMRIYIE	ASMRIYIE
TDP048	XXASMRIY	0-0-0-0-0-0-0-0-0-0-0-0-0-0-0-0-0-0-0-0-0-0-0-0-0-0-0-0-0-0-0-0-0-0-0-0-0-0-0-0-0-0-1-0-0-1-2-3-1-1-2-0			35.5	0	0
TDP048	XASMRIYI	0-0-0-0-0-0-0-0-0-0-0-0-0-0-0-0-0-0-0-0-0-0-0-0-0-0-0-0-0-0-0-0-0-0-0-0-0-0-0-0-1-1-1-2-0-0-1-3-1-1-3-3			26.9	0	0																																										XASMRIYI
TDP048	XXXASMRI	0-0-0-0-0-0-0-0-0-0-0-0-0-0-0-0-0-0-0-0-0-0-0-0-0-0-0-0-0-0-0-0-0-0-0-0-0-0-0-1-1-0-0-0-1-1-1-2-0-0-1-0			32.3	0	0																																									XXXASMRI	XXXASMRI
TDP048	SMRIYIEP	0-0-1-0-1-0-0-0-0-0-0-0-0-1-0-0-0-1-0-0-0-0-0-0-0-0-0-0-0-0-0-0-0-0-0-0-0-0-0-0-0-1-1-1-0-1-1-1-0-0-1-1			29.1	0	0				SMRIYIEP		SMRIYIEP									SMRIYIEP				SMRIYIEP
--------
TDP048	ASMRIYIEPETFDK	1-1-1-1-1-1-1-1-1-1-1-1-1-1-1-1-1-1-1-1-1-1-1-1-1-1-1-1-1-1-1-1-1-1-1-1-1-1-1-1-1-1-0-1-1-1-1-1-1-1-1-0	3 times in 3 NECs		41.1	36.4	0
TDP048	as^MRIYIEPETFDK	0-0-0-0-0-0-0-0-0-0-0-0-0-0-0-0-0-0-0-0-0-0-0-0-0-0-0-0-0-0-0-0-0-0-0-0-0-0-0-0-0-0-1-0-0-1-0-1-1-1-1-0			35.5	0	0
TDP048	asmr^IYIEPETFDK	0-0-0-0-0-0-0-0-0-0-0-0-1-0-0-0-0-0-0-0-0-1-0-0-0-0-0-0-0-0-0-0-0-0-0-0-0-0-0-1-1-1-1-1-1-1-1-1-1-1-1-1			36.4	0	0
TDP048	asmri^YIEPETFDK	0-0-1-0-1-0-0-0-0-0-0-0-0-1-0-0-0-1-0-0-0-0-0-0-0-0-0-0-0-0-0-0-0-0-0-0-0-0-0-0-0-1-1-1-0-1-1-1-0-0-1-1			29.1	0	0
TDP048	asm^RIYIEPETFDK	0-0-0-0-0-0-0-0-0-0-0-0-0-0-0-0-0-0-0-0-0-0-0-0-0-0-0-0-0-0-0-0-0-0-0-0-0-0-0-0-1-1-1-1-0-0-1-1-1-1-1-1			26.9	0	0
TDP048	ASMRIYIEPETFD^k	0-0-0-1-0-0-0-0-0-0-0-0-0-0-0-0-0-0-0-0-0-0-0-0-0-0-1-0-0-0-0-0-1-1-0-0-0-0-0-0-0-1-1-0-0-0-1-0-1-1-1-0	2 times in 3 NECs		24.1	25	0
TDP048	ASMRIYIEPETF^dk	0-0-0-0-0-0-0-0-0-0-0-0-0-0-0-0-0-0-0-0-0-0-0-0-0-0-0-0-0-0-0-0-0-0-0-0-0-0-0-0-0-1-1-0-0-0-1-0-0-0-0-0			21.3	0	0
TDP048	a^SMRIYIEPETFDK	0-0-0-0-0-0-0-0-0-0-0-0-0-0-0-0-0-0-0-0-0-0-0-0-0-0-0-0-0-0-0-0-0-0-0-0-0-0-0-1-1-0-0-0-1-1-1-1-0-0-1-0			32.3	0	0
TDP048	asm^RIYIEPETF^dk	0-0-0-0-0-0-0-0-0-0-0-0-0-0-0-0-0-0-0-0-0-0-0-0-0-0-0-0-0-0-0-0-0-0-0-0-0-0-0-0-0-0-0-1-0-0-0-1-0-0-1-1			24.8	0	0
TDP048	as^MRIYIEPETF^dk	0-0-0-0-0-0-0-0-0-0-0-0-0-0-0-0-0-0-0-0-0-0-0-0-0-0-0-0-0-0-0-0-0-0-0-0-0-0-0-0-0-0-0-0-0-0-1-1-0-0-0-0			22	0	0
TDP048	as^MRIYIEPETFD^k	0-0-0-0-0-0-0-0-0-0-0-0-0-0-0-0-0-0-0-0-0-0-0-0-0-0-0-0-0-0-0-0-0-0-0-0-0-0-0-0-0-0-0-0-0-0-0-0-0-0-1-0			21.5	0	0
TDP048	asm^RIYIEPETFD^k	0-0-0-0-0-0-0-0-0-0-0-0-0-0-0-0-0-0-0-0-0-0-0-0-0-0-0-0-0-0-0-0-0-0-0-0-0-0-0-0-0-0-0-0-0-0-0-0-0-0-1-1			18.9	0	0
TDP048	ASMRIYIEPET^fdk	0-0-0-0-1-0-0-0-0-0-0-0-0-0-0-0-0-0-0-0-0-0-0-0-0-0-0-0-0-0-0-0-0-0-0-0-0-0-0-1-0-0-0-0-0-0-0-0-0-0-0-0			19	0	0
TDP048	asmriy^IEPETFDK	0-0-0-1-1-0-0-0-0-0-0-0-0-0-0-0-0-0-0-0-0-0-0-0-0-0-0-0-0-0-0-0-0-0-0-0-0-0-0-0-1-1-1-1-1-1-1-1-1-1-1-1			29.1	0	0
TDP048	as^MRIYIEPET^fdk	0-0-0-0-0-0-0-0-0-0-0-0-0-0-0-0-0-0-0-0-0-0-0-0-0-0-0-0-0-0-0-0-0-0-0-0-0-0-0-0-0-0-0-0-0-0-1-1-0-0-0-0			17.4	0	0
TDP048	asmr^IYIEPETF^dk	0-0-0-0-0-0-0-0-0-0-0-0-0-0-0-0-0-0-0-0-0-0-0-0-0-0-0-0-0-0-0-0-0-0-0-0-0-0-0-0-0-0-0-1-0-0-0-1-0-0-0-1			15.7	0	0
TDP048	ASMRIYIE^petfdk	0-0-0-0-1-0-0-0-0-0-0-0-0-0-0-0-0-0-0-0-0-0-0-0-0-0-0-0-0-0-0-0-0-0-0-0-0-0-0-0-0-0-0-0-0-0-0-0-0-0-0-0			20.4	0	0
TDP048	asm^RIYIEPET^fdk	0-0-0-0-0-0-0-0-0-0-0-0-0-0-0-0-0-0-0-0-0-0-0-0-0-0-0-0-0-0-0-0-0-0-0-0-0-0-0-0-0-0-0-0-0-0-0-1-0-0-0-0			15	0	0
TDP048	ASMRIY^iepetfdk	0-0-0-0-0-0-0-0-0-0-0-0-0-0-0-0-0-0-0-0-0-0-0-0-0-0-0-0-0-0-0-0-0-0-0-0-0-0-0-0-0-1-1-0-0-0-1-0-0-1-1-0			18.6	0	0
TDP048	asmr^IYIEPETFD^k	0-0-0-0-0-0-0-0-0-0-0-0-0-0-0-0-0-0-0-0-0-0-0-0-0-0-0-0-0-0-0-0-0-0-0-0-0-0-0-0-0-0-0-0-0-0-0-0-0-0-1-0			16	0	0
TDP048	a^SMRIY^iepetfdk	0-0-0-0-0-0-0-0-0-0-0-0-0-0-0-0-0-0-0-0-0-0-0-0-0-0-0-0-0-0-0-0-0-0-0-0-0-0-0-0-0-0-0-0-0-0-0-1-0-0-0-0			15	0	0
TDP049	SHTNDLPL	0-0-0-1-1-0-0-0-0-1-0-0-1-1-0-0-0-1-0-0-0-0-0-0-0-0-0-0-0-0-0-0-0-0-0-0-0-0-0-0-0-1-1-1-0-1-1-1-0-1-1-1			36.2	0	0					SHTNDLPL	SHTNDLPL					SHTNDLPL			SHTNDLPL	SHTNDLPL				SHTNDLPL
TDP049	XXKSHTND	1-1-1-1-1-1-1-1-1-1-1-1-1-1-1-1-1-1-1-1-0-1-0-0-1-1-1-0-1-0-0-1-1-0-1-0-1-1-1-1-1-1-1-2-1-1-2-4-1-1-1-4	2 times in 3 NECs		34.4	34	0		XXKSHTND	XXKSHTND	XXKSHTND	XXKSHTND	XXKSHTND	XXKSHTND	XXKSHTND	XXKSHTND	XXKSHTND	XXKSHTND	XXKSHTND	XXKSHTND	XXKSHTND	XXKSHTND	XXKSHTND	XXKSHTND	XXKSHTND	XXKSHTND	XXKSHTND	XXKSHTND		XXKSHTND			XXKSHTND	XXKSHTND	XXKSHTND		XXKSHTND			XXKSHTND	XXKSHTND		XXKSHTND		XXKSHTND	XXKSHTND	XXKSHTND	XXKSHTND	XXKSHTND
TDP049	LPLISVMR	0-0-0-0-0-0-0-0-0-0-0-0-0-0-0-0-0-0-0-0-0-0-0-0-0-0-0-0-0-0-0-0-0-0-0-0-0-0-0-0-0-0-1-2-0-0-1-2-0-0-1-0			19.7	0	0
TDP049	PLISVMRX	0-0-0-0-0-0-0-0-0-0-0-0-0-0-0-0-0-0-0-0-0-1-0-0-0-0-0-0-0-0-0-0-0-0-0-0-0-0-0-1-0-1-2-3-0-1-1-3-0-1-1-2			28.5	0	0																							PLISVMRX																		PLISVMRX
TDP049	LISVMRXX	0-0-0-0-1-0-0-0-0-0-0-0-1-0-0-0-0-0-0-0-0-0-0-0-0-0-0-0-0-0-0-0-0-0-0-0-0-0-0-0-0-1-1-3-1-1-2-3-0-1-1-2			26.2	0	0						LISVMRXX								LISVMRXX
TDP049	ISVMRXXX	0-0-1-0-0-0-1-0-1-1-0-1-1-1-0-0-0-1-0-0-0-0-0-0-0-0-0-0-0-0-0-0-0-0-1-0-0-0-0-0-1-1-1-0-0-1-1-1-0-1-1-2			25.3	0	0				ISVMRXXX				ISVMRXXX		ISVMRXXX	ISVMRXXX		ISVMRXXX	ISVMRXXX	ISVMRXXX				ISVMRXXX																	ISVMRXXX						ISVMRXXX
TDP049	DLPLISVM	0-0-0-0-0-0-0-0-0-0-0-0-0-0-0-0-0-0-0-0-0-0-0-0-0-0-0-0-0-0-0-0-0-0-0-0-0-0-0-0-0-0-0-1-0-0-0-1-0-0-0-0			16.7	0	0
TDP049	NDLPLISV	0-0-0-0-0-0-0-0-0-0-0-0-0-0-0-0-0-0-0-0-0-1-0-0-0-0-0-0-1-0-0-0-0-0-0-0-0-0-0-0-1-0-0-0-0-0-1-1-0-1-1-1			20.6	0	0																							NDLPLISV							NDLPLISV												NDLPLISV
TDP049	HTNDLPLI	0-1-1-1-0-0-1-1-1-1-1-1-1-0-1-1-1-1-1-1-1-1-0-1-0-0-0-1-1-1-0-1-1-1-1-0-1-1-1-1-1-1-1-1-1-1-1-1-1-1-1-1	3 times in 3 NECs		35.3	34.9	0			HTNDLPLI	HTNDLPLI	HTNDLPLI			HTNDLPLI	HTNDLPLI	HTNDLPLI	HTNDLPLI	HTNDLPLI	HTNDLPLI	HTNDLPLI		HTNDLPLI	HTNDLPLI	HTNDLPLI	HTNDLPLI	HTNDLPLI	HTNDLPLI	HTNDLPLI	HTNDLPLI		HTNDLPLI				HTNDLPLI	HTNDLPLI	HTNDLPLI		HTNDLPLI	HTNDLPLI	HTNDLPLI	HTNDLPLI		HTNDLPLI	HTNDLPLI	HTNDLPLI	HTNDLPLI	HTNDLPLI
TDP049	KSHTNDLP	0-0-0-0-0-0-0-0-0-0-0-0-0-0-0-0-0-0-0-0-0-0-0-0-0-0-0-0-0-0-0-0-0-0-0-0-0-0-0-0-0-0-1-0-0-0-0-1-0-0-1-1			29	0	0
TDP049	XXXKSHTN	0-0-0-0-0-1-1-1-0-0-1-0-0-0-0-0-0-0-1-1-1-1-1-0-0-0-0-1-1-1-1-1-0-1-1-0-1-1-1-0-0-1-2-3-1-1-1-4-1-1-1-1			40	0	0							XXXKSHTN	XXXKSHTN	XXXKSHTN			XXXKSHTN								XXXKSHTN	XXXKSHTN	XXXKSHTN	XXXKSHTN	XXXKSHTN					XXXKSHTN	XXXKSHTN	XXXKSHTN	XXXKSHTN	XXXKSHTN		XXXKSHTN	XXXKSHTN		XXXKSHTN	XXXKSHTN	XXXKSHTN
TDP049	XKSHTNDL	0-0-0-0-0-0-0-0-0-0-0-0-0-0-0-0-0-0-0-0-0-0-0-0-0-0-0-0-0-0-0-0-0-0-0-0-0-0-0-0-0-0-1-0-0-0-0-0-0-1-1-1			33.9	0	0
--------
TDP049	KSHTNDLPLISVMR	1-1-1-1-1-1-1-1-1-1-1-1-1-1-1-1-1-1-1-1-1-1-1-1-1-1-1-1-1-1-1-1-1-1-1-1-1-1-1-1-1-1-1-1-1-1-1-0-1-1-1-1	3 times in 3 NECs		47.6	44.6	0
TDP049	ks^HTNDLPLISVMR	1-1-1-1-1-1-1-1-1-1-1-1-1-1-1-1-1-1-1-1-0-1-0-0-1-1-1-0-1-0-0-1-1-0-1-0-1-1-1-1-1-1-1-0-1-1-1-1-1-1-1-1	2 times in 3 NECs		34.4	34	0
TDP049	k^SHTNDLPLISVMR	0-0-0-0-0-1-1-1-0-0-1-0-0-0-0-0-0-0-1-1-1-1-1-0-0-0-0-1-1-1-1-1-0-1-1-0-1-1-1-0-0-1-1-0-1-1-1-1-1-1-1-1			40	0	0
TDP049	ksh^TNDLPLISVMR	0-0-0-0-0-0-0-0-0-0-0-0-0-0-0-0-0-0-0-0-0-0-0-0-0-0-0-0-0-0-0-0-0-0-0-0-0-0-0-0-0-0-1-0-0-0-0-0-0-1-1-1			33.9	0	0
TDP049	kshtn^DLPLISVMR	0-0-0-1-1-0-0-0-0-1-0-0-1-1-0-0-0-1-0-0-0-0-0-0-0-0-0-0-0-0-0-0-0-0-0-0-0-0-0-0-0-1-1-1-0-1-1-1-0-1-1-1			36.2	0	0
TDP049	ksht^NDLPLISVMR	0-0-0-0-0-0-0-0-0-0-0-0-0-0-0-0-0-0-0-0-0-0-0-0-0-0-0-0-0-0-0-0-0-0-0-0-0-0-0-0-0-0-1-0-0-0-0-1-0-0-1-1			29	0	0
TDP049	kshtnd^LPLISVMR	0-1-1-1-0-0-1-1-1-1-1-1-1-0-1-1-1-1-1-1-1-1-0-1-0-0-0-1-1-1-0-1-1-1-1-0-1-1-1-1-1-1-1-1-1-1-1-1-1-1-1-1	3 times in 3 NECs		35.3	34.9	0
TDP049	ks^HTNDLPLISV^mr	0-0-0-0-0-0-0-0-0-0-0-0-0-0-0-0-0-0-0-0-0-0-0-0-0-0-0-0-0-0-0-0-0-0-0-0-0-0-0-0-0-0-0-1-0-0-1-1-0-0-0-1			20	0	0
TDP049	KSHTNDLPLISVM^r	0-0-1-0-0-0-1-0-1-1-0-1-1-1-0-0-0-1-0-0-0-0-0-0-0-0-0-0-0-0-0-0-0-0-1-0-0-0-0-0-1-1-1-0-0-1-1-1-0-1-1-1			25.3	0	0
TDP049	k^SHTNDLPLIS^vmr	0-0-0-0-0-0-0-0-0-0-0-0-0-0-0-0-0-0-0-0-0-0-0-0-0-0-0-0-0-0-0-0-0-0-0-0-0-0-0-0-0-0-1-1-0-0-0-1-0-0-0-0			23.1	0	0
TDP049	ks^HTNDLPLISVM^r	0-0-0-0-0-0-0-0-0-0-0-0-0-0-0-0-0-0-0-0-0-0-0-0-0-0-0-0-0-0-0-0-0-0-0-0-0-0-0-0-0-0-0-0-0-0-0-0-0-0-0-1			18.1	0	0
TDP049	KSHTNDLPLISV^mr	0-0-0-0-1-0-0-0-0-0-0-0-1-0-0-0-0-0-0-0-0-0-0-0-0-0-0-0-0-0-0-0-0-0-0-0-0-0-0-0-0-1-1-1-1-1-1-1-0-1-1-1			26.2	0	0
TDP049	k^SHTNDLPLI^svmr	0-0-0-0-0-0-0-0-0-0-0-0-0-0-0-0-0-0-0-0-0-0-0-0-0-0-0-0-0-0-0-0-0-0-0-0-0-0-0-0-0-0-0-1-0-0-0-1-0-0-0-0			19.6	0	0
TDP049	KSHTNDLPLIS^vmr	0-0-0-0-0-0-0-0-0-0-0-0-0-0-0-0-0-0-0-0-0-1-0-0-0-0-0-0-0-0-0-0-0-0-0-0-0-0-0-1-0-1-1-1-0-1-1-1-0-1-1-1			28.5	0	0
TDP049	kshtndlp^LISVMR	0-0-0-0-0-0-0-0-0-0-0-0-0-0-0-0-0-0-0-0-0-1-0-0-0-0-0-0-1-0-0-0-0-0-0-0-0-0-0-0-1-0-0-0-0-0-1-1-0-1-1-1			20.6	0	0
TDP049	k^SHTNDLPLISV^mr	0-0-0-0-0-0-0-0-0-0-0-0-0-0-0-0-0-0-0-0-0-0-0-0-0-0-0-0-0-0-0-0-0-0-0-0-0-0-0-0-0-0-0-1-0-0-0-1-0-0-0-0			15.8	0	0
TDP049	ks^HTNDLPLIS^vmr	0-0-0-0-0-0-0-0-0-0-0-0-0-0-0-0-0-0-0-0-0-0-0-0-0-0-0-0-0-0-0-0-0-0-0-0-0-0-0-0-0-0-0-1-0-0-0-1-0-0-0-1			17.2	0	0
TDP049	ks^HTNDLPLI^svmr	0-0-0-0-0-0-0-0-0-0-0-0-0-0-0-0-0-0-0-0-0-0-0-0-0-0-0-0-0-0-0-0-0-0-0-0-0-0-0-0-0-0-0-0-0-0-0-1-0-0-0-0			18.8	0	0
TDP049	KSHTNDLPLI^svmr	0-0-0-0-0-0-0-0-0-0-0-0-0-0-0-0-0-0-0-0-0-0-0-0-0-0-0-0-0-0-0-0-0-0-0-0-0-0-0-0-0-0-1-1-0-0-1-0-0-0-1-0			19.7	0	0
TDP049	KSHTNDLPL^isvmr	0-0-0-0-0-0-0-0-0-0-0-0-0-0-0-0-0-0-0-0-0-0-0-0-0-0-0-0-0-0-0-0-0-0-0-0-0-0-0-0-0-0-0-1-0-0-0-1-0-0-0-0			16.7	0	0
TDP050	XNTLIQVP	1-1-1-1-1-0-1-0-1-1-1-1-1-1-0-1-0-1-1-1-1-1-0-0-0-0-1-1-0-1-0-1-1-0-0-1-1-1-0-1-1-1-0-2-1-1-1-0-1-1-1-1	3 times in 3 NECs		34.5	28.2	0		XNTLIQVP	XNTLIQVP	XNTLIQVP	XNTLIQVP	XNTLIQVP		XNTLIQVP		XNTLIQVP	XNTLIQVP	XNTLIQVP	XNTLIQVP	XNTLIQVP	XNTLIQVP		XNTLIQVP		XNTLIQVP	XNTLIQVP	XNTLIQVP	XNTLIQVP	XNTLIQVP					XNTLIQVP	XNTLIQVP		XNTLIQVP		XNTLIQVP	XNTLIQVP			XNTLIQVP	XNTLIQVP	XNTLIQVP		XNTLIQVP	XNTLIQVP
TDP050	VPVKHEGP	0-0-0-0-0-0-0-0-0-0-0-0-0-0-0-0-0-0-0-0-0-0-0-0-0-0-0-0-0-0-0-0-0-0-0-0-0-0-0-0-0-0-0-2-0-0-0-1-0-0-0-1			29.5	0	0
TDP050	XXNTLIQV	1-1-1-1-1-1-1-1-1-1-1-1-1-1-1-1-1-1-0-1-1-1-1-0-1-0-1-1-1-1-0-0-1-1-1-1-0-1-1-1-0-1-1-2-1-1-1-1-1-1-1-2	3 times in 3 NECs		36	25.1	0		XXNTLIQV	XXNTLIQV	XXNTLIQV	XXNTLIQV	XXNTLIQV	XXNTLIQV	XXNTLIQV	XXNTLIQV	XXNTLIQV	XXNTLIQV	XXNTLIQV	XXNTLIQV	XXNTLIQV	XXNTLIQV	XXNTLIQV	XXNTLIQV	XXNTLIQV	XXNTLIQV		XXNTLIQV	XXNTLIQV	XXNTLIQV	XXNTLIQV		XXNTLIQV		XXNTLIQV	XXNTLIQV	XXNTLIQV	XXNTLIQV			XXNTLIQV	XXNTLIQV	XXNTLIQV	XXNTLIQV		XXNTLIQV	XXNTLIQV	XXNTLIQV
TDP050	PVKHEGPK	0-0-0-0-0-0-0-0-0-0-0-0-0-0-0-0-0-0-0-0-0-0-0-0-0-0-0-0-0-0-0-0-0-0-0-0-0-0-0-0-0-1-1-2-0-1-1-1-0-1-1-2			32.1	0	0
TDP050	QVPVKHEG	0-0-0-0-0-0-0-0-0-0-0-0-0-0-0-0-0-0-0-0-0-0-0-0-0-0-0-0-0-0-0-0-0-0-0-0-0-0-0-0-0-0-0-1-0-0-0-1-0-0-1-1			17.7	0	0
TDP050	VKHEGPKX	0-0-0-0-0-0-0-0-0-0-0-0-0-0-0-0-0-0-0-0-0-0-0-0-0-0-0-0-0-0-0-0-0-0-0-0-0-0-0-0-1-1-1-1-0-1-1-1-0-0-1-1			26.2	0	0																																										VKHEGPKX
TDP050	HEGPKXXX	0-0-0-0-0-0-0-0-0-0-0-0-0-0-0-0-0-0-0-0-0-0-0-0-0-0-0-0-0-0-0-0-0-0-0-0-0-0-0-0-0-0-0-0-0-0-1-1-0-0-0-0			22.4	0	0
TDP050	LIQVPVKH	0-0-0-0-0-0-0-0-0-0-0-0-0-0-0-0-0-0-1-1-0-0-0-0-0-0-1-0-0-0-0-0-0-0-0-0-0-0-0-0-0-0-0-0-0-0-0-0-1-0-0-0			28.7	0	0																				LIQVPVKH	LIQVPVKH							LIQVPVKH
TDP050	XXXNTLIQ	1-1-0-1-0-1-1-1-1-0-1-1-1-0-0-1-0-0-1-1-1-1-1-0-0-0-0-0-0-0-1-1-1-0-0-1-0-1-0-1-1-0-0-0-0-0-1-0-1-1-1-1	2 times in 3 NECs		39.2	22.6	0		XXXNTLIQ	XXXNTLIQ		XXXNTLIQ		XXXNTLIQ	XXXNTLIQ	XXXNTLIQ	XXXNTLIQ		XXXNTLIQ	XXXNTLIQ	XXXNTLIQ			XXXNTLIQ			XXXNTLIQ	XXXNTLIQ	XXXNTLIQ	XXXNTLIQ	XXXNTLIQ								XXXNTLIQ	XXXNTLIQ	XXXNTLIQ			XXXNTLIQ		XXXNTLIQ		XXXNTLIQ	XXXNTLIQ
TDP050	TLIQVPVK	0-0-0-0-0-0-0-0-0-0-0-0-0-0-0-1-0-0-0-0-0-0-0-0-0-0-0-0-0-0-0-0-0-0-0-0-0-0-0-0-0-0-0-0-0-0-0-0-0-0-0-0			17.6	0	0																	TLIQVPVK
--------
TDP050	NTLIQVPVKHEGPK	1-1-1-1-1-1-1-1-1-1-1-1-1-1-1-1-1-1-1-1-1-1-1-1-1-1-1-1-1-1-1-1-1-1-1-1-1-1-1-1-1-1-1-1-1-1-1-1-1-1-1-1	3 times in 3 NECs		50.9	45.2	0
TDP050	n^TLIQVPVKHEGPK	1-1-0-1-0-1-1-1-1-0-1-1-1-0-0-1-0-0-1-1-1-1-1-0-0-0-0-0-0-0-1-1-1-0-0-1-0-1-0-1-1-0-0-0-0-0-1-0-1-1-1-1	2 times in 3 NECs		39.2	22.6	0
TDP050	ntl^IQVPVKHEGPK	1-1-1-1-1-0-1-0-1-1-1-1-1-1-0-1-0-1-1-1-1-1-0-0-0-0-1-1-0-1-0-1-1-0-0-1-1-1-0-1-1-1-0-1-1-1-1-0-1-1-1-1	3 times in 3 NECs		34.5	28.2	0
TDP050	nt^LIQVPVKHEGPK	1-1-1-1-1-1-1-1-1-1-1-1-1-1-1-1-1-1-0-1-1-1-1-0-1-0-1-1-1-1-0-0-1-1-1-1-0-1-1-1-0-1-1-1-1-1-1-1-1-1-1-1	3 times in 3 NECs		36	25.1	0
TDP050	NTLIQVPVKH^egpk	0-0-0-0-0-0-0-0-0-0-0-0-0-0-0-0-0-0-0-0-0-0-0-0-0-0-0-0-0-0-0-0-0-0-0-0-0-0-0-0-0-1-1-1-0-1-1-1-0-1-1-1			32.1	0	0
TDP050	ntliqv^PVKHEGPK	0-0-0-0-0-0-0-0-0-0-0-0-0-0-0-0-0-0-1-1-0-0-0-0-0-0-1-0-0-0-0-0-0-0-0-0-0-0-0-0-0-0-0-0-0-0-0-0-1-0-0-0			28.7	0	0
TDP050	NTLIQVPVK^hegpk	0-0-0-0-0-0-0-0-0-0-0-0-0-0-0-0-0-0-0-0-0-0-0-0-0-0-0-0-0-0-0-0-0-0-0-0-0-0-0-0-0-0-0-1-0-0-0-1-0-0-0-1			29.5	0	0
TDP050	NTLIQVPVKHE^gpk	0-0-0-0-0-0-0-0-0-0-0-0-0-0-0-0-0-0-0-0-0-0-0-0-0-0-0-0-0-0-0-0-0-0-0-0-0-0-0-0-1-1-1-1-0-1-1-1-0-0-1-1			26.2	0	0
TDP050	nt^LIQVPVKH^egpk	0-0-0-0-0-0-0-0-0-0-0-0-0-0-0-0-0-0-0-0-0-0-0-0-0-0-0-0-0-0-0-0-0-0-0-0-0-0-0-0-0-0-0-1-0-0-0-0-0-0-0-1			21.2	0	0
TDP050	NTLIQVPVKHEGP^k	0-0-0-0-0-0-0-0-0-0-0-0-0-0-0-0-0-0-0-0-0-0-0-0-0-0-0-0-0-0-0-0-0-0-0-0-0-0-0-0-0-0-0-0-0-0-1-1-0-0-0-0			22.4	0	0
TDP050	NTLIQVPV^khegpk	0-0-0-0-0-0-0-0-0-0-0-0-0-0-0-0-0-0-0-0-0-0-0-0-0-0-0-0-0-0-0-0-0-0-0-0-0-0-0-0-0-0-0-1-0-0-0-1-0-0-1-1			17.7	0	0
TDP050	ntl^IQVPVK^hegpk	0-0-0-0-0-0-0-0-0-0-0-0-0-0-0-0-0-0-0-0-0-0-0-0-0-0-0-0-0-0-0-0-0-0-0-0-0-0-0-0-0-0-0-1-0-0-0-0-0-0-0-0			15.4	0	0
TDP050	ntliq^VPVKHEGPK	0-0-0-0-0-0-0-0-0-0-0-0-0-0-0-1-0-0-0-0-0-0-0-0-0-0-0-0-0-0-0-0-0-0-0-0-0-0-0-0-0-0-0-0-0-0-0-0-0-0-0-0			17.6	0	0
TDP051	XVSPAPTY	0-0-0-0-0-0-0-0-0-0-0-0-0-0-0-0-0-0-0-0-0-0-0-0-0-0-0-0-0-0-0-0-0-0-0-0-0-0-0-0-0-1-1-0-0-0-0-0-0-1-1-1			26	0	0
TDP051	GRLWIHKX	0-0-0-0-1-0-0-0-0-0-0-0-0-1-0-0-0-0-0-0-0-0-0-0-0-0-0-0-0-0-0-0-0-0-0-0-0-0-0-0-1-3-3-0-1-1-4-1-1-3-4-3			34.2	0	0						GRLWIHKX									GRLWIHKX																											GRLWIHKX
TDP051	XXVSPAPT	0-0-0-0-0-0-0-0-0-0-0-0-0-0-0-0-0-0-0-1-1-0-0-1-0-0-1-1-1-1-0-0-0-0-0-0-0-0-0-0-0-0-0-0-0-1-1-0-0-1-0-0			25.3	0	0																					XXVSPAPT	XXVSPAPT			XXVSPAPT			XXVSPAPT	XXVSPAPT	XXVSPAPT	XXVSPAPT
TDP051	XXXVSPAP	0-1-1-1-0-0-1-1-1-1-1-1-1-0-1-0-1-0-0-1-0-1-0-0-0-0-1-0-0-1-0-1-1-1-0-1-1-1-0-0-1-2-1-1-1-1-3-1-1-1-1-1	3 times in 3 NECs		30.8	26.4	0			XXXVSPAP	XXXVSPAP	XXXVSPAP			XXXVSPAP	XXXVSPAP	XXXVSPAP	XXXVSPAP	XXXVSPAP	XXXVSPAP	XXXVSPAP		XXXVSPAP		XXXVSPAP			XXXVSPAP		XXXVSPAP					XXXVSPAP			XXXVSPAP		XXXVSPAP	XXXVSPAP	XXXVSPAP		XXXVSPAP	XXXVSPAP	XXXVSPAP			XXXVSPAP
TDP051	TYGRLWIH	0-0-0-1-1-0-0-0-0-0-0-0-0-0-0-0-0-0-0-0-0-0-0-0-0-0-0-0-0-0-0-0-0-0-0-0-0-0-0-0-1-1-1-2-0-1-1-2-1-1-1-1			33.5	0	0					TYGRLWIH	TYGRLWIH																																				TYGRLWIH
TDP051	LWIHKXXX	0-0-0-0-0-0-0-0-0-0-0-0-0-0-0-0-0-0-0-0-0-0-0-0-0-0-0-0-0-0-0-0-0-0-0-0-0-0-0-0-0-0-0-0-1-0-1-0-1-0-0-0			35.5	0	0
TDP051	SPAPTYGR	0-0-0-0-0-0-0-0-0-0-0-0-0-0-0-0-0-0-0-0-0-0-0-0-0-0-0-0-0-0-0-0-0-0-0-0-0-0-0-0-0-0-0-0-0-0-1-0-0-0-1-0			18.5	0	0
TDP051	APTYGRLW	0-0-0-0-0-0-0-0-0-0-0-0-0-0-0-0-0-0-0-0-0-0-0-0-0-0-0-0-0-0-0-0-0-0-0-0-0-0-0-0-0-0-0-0-0-0-0-1-0-0-0-0			16.2	0	0
TDP051	YGRLWIHK	1-0-1-1-1-1-1-1-1-1-1-0-1-1-1-1-1-1-1-1-1-1-1-1-1-0-1-1-1-1-1-1-1-1-1-1-1-1-1-1-1-1-1-0-1-1-1-1-1-1-1-1	3 times in 3 NECs		33.5	23.6	0		YGRLWIHK		YGRLWIHK	YGRLWIHK	YGRLWIHK	YGRLWIHK	YGRLWIHK	YGRLWIHK	YGRLWIHK	YGRLWIHK	YGRLWIHK		YGRLWIHK	YGRLWIHK	YGRLWIHK	YGRLWIHK	YGRLWIHK	YGRLWIHK	YGRLWIHK	YGRLWIHK	YGRLWIHK	YGRLWIHK	YGRLWIHK	YGRLWIHK	YGRLWIHK		YGRLWIHK	YGRLWIHK	YGRLWIHK	YGRLWIHK	YGRLWIHK	YGRLWIHK	YGRLWIHK	YGRLWIHK	YGRLWIHK	YGRLWIHK	YGRLWIHK	YGRLWIHK	YGRLWIHK	YGRLWIHK	YGRLWIHK
TDP051	RLWIHKXX	0-0-0-0-0-0-0-0-0-0-0-0-0-0-0-0-0-0-0-0-0-0-0-0-0-0-0-0-0-0-0-0-0-0-0-0-0-0-0-0-0-1-0-0-0-1-1-0-1-1-1-0			29.5	0	0
--------
TDP051	VSPAPTYGR^lwihk	0-0-0-1-1-0-0-0-0-0-0-0-0-0-0-0-0-0-0-0-0-0-0-0-0-0-0-0-0-0-0-0-0-0-0-0-0-0-0-0-1-1-1-1-0-1-1-1-1-1-1-1			33.5	0	0
TDP051	VSPAPTYGRLWIHK	1-1-1-1-1-1-1-1-1-1-1-1-1-1-1-1-1-1-1-1-1-1-1-1-1-1-1-1-1-1-1-1-1-1-1-1-1-1-1-1-1-1-0-1-1-1-1-0-1-1-1-0	3 times in 3 NECs		46.4	38.8	0
TDP051	VSPAPTYGRLWIH^k	0-0-0-0-0-0-0-0-0-0-0-0-0-0-0-0-0-0-0-0-0-0-0-0-0-0-0-0-0-0-0-0-0-0-0-0-0-0-0-0-0-0-0-0-1-0-0-0-1-0-0-0			35.5	0	0
TDP051	VSPAPTYGRLW^ihk	0-0-0-0-1-0-0-0-0-0-0-0-0-1-0-0-0-0-0-0-0-0-0-0-0-0-0-0-0-0-0-0-0-0-0-0-0-0-0-0-1-1-1-0-1-1-1-1-1-1-1-1			34.2	0	0
TDP051	v^SPAPTYGRLWIHK	0-1-1-1-0-0-1-1-1-1-1-1-1-0-1-0-1-0-0-1-0-1-0-0-0-0-1-0-0-1-0-1-1-1-0-1-1-1-0-0-1-1-0-0-1-1-1-0-1-1-0-0	3 times in 3 NECs		30.8	26.4	0
TDP051	VSPAPTYGRL^wihk	1-0-1-1-1-1-1-1-1-1-1-0-1-1-1-1-1-1-1-1-1-1-1-1-1-0-1-1-1-1-1-1-1-1-1-1-1-1-1-1-1-1-1-0-1-1-1-1-1-1-1-1	3 times in 3 NECs		33.5	23.6	0
TDP051	v^SPAPTYGR^lwihk	0-0-0-0-0-0-0-0-0-0-0-0-0-0-0-0-0-0-0-0-0-0-0-0-0-0-0-0-0-0-0-0-0-0-0-0-0-0-0-0-0-0-0-1-0-0-0-1-0-0-0-0			28.6	0	0
TDP051	v^SPAPTYGRLW^ihk	0-0-0-0-0-0-0-0-0-0-0-0-0-0-0-0-0-0-0-0-0-0-0-0-0-0-0-0-0-0-0-0-0-0-0-0-0-0-0-0-0-1-1-0-0-0-1-0-0-0-1-1			29.7	0	0
TDP051	vs^PAPTYGRLWIHK	0-0-0-0-0-0-0-0-0-0-0-0-0-0-0-0-0-0-0-1-1-0-0-1-0-0-1-1-1-1-0-0-0-0-0-0-0-0-0-0-0-0-0-0-0-1-0-0-0-0-0-0			25.3	0	0
TDP051	v^SPAPTYGRLWIH^k	0-0-0-0-0-0-0-0-0-0-0-0-0-0-0-0-0-0-0-0-0-0-0-0-0-0-0-0-0-0-0-0-0-0-0-0-0-0-0-0-0-0-0-0-0-0-1-0-0-0-0-0			21.2	0	0
TDP051	VSPAPTYGRLWI^hk	0-0-0-0-0-0-0-0-0-0-0-0-0-0-0-0-0-0-0-0-0-0-0-0-0-0-0-0-0-0-0-0-0-0-0-0-0-0-0-0-0-1-0-0-0-1-1-0-1-1-1-0			29.5	0	0
TDP051	vsp^APTYGRLW^ihk	0-0-0-0-0-0-0-0-0-0-0-0-0-0-0-0-0-0-0-0-0-0-0-0-0-0-0-0-0-0-0-0-0-0-0-0-0-0-0-0-0-1-1-0-0-0-0-0-0-1-1-1			26	0	0
TDP051	vspap^TYGRLW^ihk	0-0-0-0-0-0-0-0-0-0-0-0-0-0-0-0-0-0-0-0-0-0-0-0-0-0-0-0-0-0-0-0-0-0-0-0-0-0-0-0-0-0-0-0-0-0-1-0-0-0-1-0			18.5	0	0
TDP051	VSPAPTY^grlwihk	0-0-0-0-0-0-0-0-0-0-0-0-0-0-0-0-0-0-0-0-0-0-0-0-0-0-0-0-0-0-0-0-0-0-0-0-0-0-0-0-0-0-0-0-0-0-0-1-0-0-0-0			16.2	0	0
TDP051	vs^PAPTYGRLW^ihk	0-0-0-0-0-0-0-0-0-0-0-0-0-0-0-0-0-0-0-0-0-0-0-0-0-0-0-0-0-0-0-0-0-0-0-0-0-0-0-0-0-0-0-0-0-0-1-0-0-1-0-0			16.7	0	0
TDP052	XXPSFNMY	0-1-0-0-0-0-0-1-0-0-0-0-0-0-1-1-1-0-0-1-0-0-0-0-0-0-0-0-0-0-0-0-0-0-1-1-0-1-1-0-1-0-0-0-1-1-1-0-1-1-0-0			34	0	0			XXPSFNMY						XXPSFNMY							XXPSFNMY	XXPSFNMY	XXPSFNMY			XXPSFNMY															XXPSFNMY	XXPSFNMY		XXPSFNMY	XXPSFNMY		XXPSFNMY
TDP052	FNMYGYDL	0-0-0-1-1-0-0-0-0-0-0-0-0-0-0-0-0-0-0-0-0-0-0-0-0-0-1-0-0-0-0-0-0-0-0-0-0-0-0-0-1-1-1-1-0-1-1-1-1-1-1-1			23.4	0	0					FNMYGYDL	FNMYGYDL																						FNMYGYDL														FNMYGYDL
TDP052	PSFNMYGY	0-0-0-0-0-0-0-0-0-0-0-0-0-1-0-0-0-1-0-0-0-0-0-0-0-0-0-0-0-0-0-0-0-0-0-0-0-0-0-0-1-1-1-0-0-1-1-1-1-1-1-1			35.1	0	0															PSFNMYGY				PSFNMYGY																							PSFNMYGY
TDP052	XPSFNMYG	0-0-1-1-0-0-0-0-0-0-0-0-0-0-0-0-0-0-0-0-0-1-0-0-0-0-0-0-0-0-0-0-0-0-0-0-0-0-0-0-0-1-1-1-0-1-1-1-0-0-1-1			33	0	0				XPSFNMYG	XPSFNMYG																		XPSFNMYG
TDP052	MYGYDLQT	0-0-0-0-0-0-0-0-0-0-0-0-0-0-0-0-0-0-0-0-0-0-0-0-0-0-0-0-0-0-0-0-0-0-0-0-0-0-0-0-0-0-0-0-0-0-1-0-0-1-0-0			16.2	0	0
TDP052	YDLQTAKX	0-0-0-0-0-0-0-0-0-1-0-0-0-0-0-0-0-0-0-0-0-0-0-0-0-0-0-0-0-0-0-0-0-0-1-0-0-0-0-1-1-1-0-0-0-0-1-0-1-1-1-0			22.4	0	0											YDLQTAKX																									YDLQTAKX					YDLQTAKX	YDLQTAKX
TDP052	DLQTAKXX	0-0-0-1-0-0-0-0-1-0-0-0-0-1-0-0-0-0-0-0-0-0-0-0-0-0-0-0-0-0-0-0-0-0-0-0-0-0-0-0-1-0-0-0-0-1-1-0-0-0-0-0			18.2	0	0					DLQTAKXX					DLQTAKXX					DLQTAKXX																											DLQTAKXX
TDP052	LQTAKXXX	0-0-0-0-0-0-0-0-0-1-0-1-1-1-0-0-0-0-0-0-0-0-0-0-0-0-0-0-0-0-0-0-0-0-0-0-0-0-0-0-1-0-0-0-0-0-1-0-1-1-0-0			18.6	0	0											LQTAKXXX		LQTAKXXX	LQTAKXXX	LQTAKXXX																											LQTAKXXX
TDP052	XXXPSFNM	0-0-0-0-0-0-0-0-0-0-0-0-0-0-0-0-0-0-0-0-0-0-0-0-0-0-0-0-0-0-0-0-0-0-1-0-0-0-0-1-1-1-0-0-1-1-0-0-0-0-0-0			29.6	0	0																																				XXXPSFNM					XXXPSFNM	XXXPSFNM
TDP052	NMYGYDLQ	0-0-1-1-1-0-0-0-0-0-0-0-0-0-0-0-0-0-1-0-0-0-0-0-0-0-0-0-0-0-0-0-0-0-0-0-0-0-0-0-0-0-1-1-0-0-0-1-0-0-0-0			21.7	0	0				NMYGYDLQ	NMYGYDLQ	NMYGYDLQ														NMYGYDLQ
TDP052	SFNMYGYD	0-0-1-1-1-0-0-0-0-0-0-0-0-0-0-0-0-0-0-0-0-1-0-0-0-0-0-0-0-0-0-0-0-0-0-0-0-0-0-0-0-1-1-1-0-1-1-1-0-0-0-0			30.5	0	0				SFNMYGYD	SFNMYGYD	SFNMYGYD																	SFNMYGYD
--------
TDP052	PSFNMYGYDLQTAK	1-1-1-1-1-1-1-1-1-1-1-1-1-1-1-1-1-1-1-1-1-1-1-1-1-1-1-1-1-1-1-1-1-1-1-1-1-1-1-1-1-1-0-1-1-1-1-1-1-1-1-1	3 times in 3 NECs		50.6	44.1	0
TDP052	psf^NMYGYDLQTAK	0-0-1-1-0-0-0-0-0-0-0-0-0-0-0-0-0-0-0-0-0-1-0-0-0-0-0-0-0-0-0-0-0-0-0-0-0-0-0-0-0-1-1-1-0-1-1-1-0-0-1-1			33	0	0
TDP052	p^SFNMYGYDLQTAK	0-0-0-0-0-0-0-0-0-0-0-0-0-0-0-0-0-0-0-0-0-0-0-0-0-0-0-0-0-0-0-0-0-0-1-0-0-0-0-1-1-1-0-0-1-1-0-0-0-0-0-0			29.6	0	0
TDP052	psfnm^YGYDLQTAK	0-0-1-1-1-0-0-0-0-0-0-0-0-0-0-0-0-0-0-0-0-1-0-0-0-0-0-0-0-0-0-0-0-0-0-0-0-0-0-0-0-1-1-1-0-1-1-1-0-0-0-0			30.5	0	0
TDP052	psfn^MYGYDLQTAK	0-0-0-0-0-0-0-0-0-0-0-0-0-1-0-0-0-1-0-0-0-0-0-0-0-0-0-0-0-0-0-0-0-0-0-0-0-0-0-0-1-1-1-0-0-1-1-1-1-1-1-1			35.1	0	0
TDP052	ps^FNMYGYDLQTAK	0-1-0-0-0-0-0-1-0-0-0-0-0-0-1-1-1-0-0-1-0-0-0-0-0-0-0-0-0-0-0-0-0-0-1-1-0-1-1-0-1-0-0-0-1-1-1-0-1-1-0-0			34	0	0
TDP052	psfnmy^GYDLQTAK	0-0-0-1-1-0-0-0-0-0-0-0-0-0-0-0-0-0-0-0-0-0-0-0-0-0-1-0-0-0-0-0-0-0-0-0-0-0-0-0-1-1-1-1-0-1-1-1-1-1-1-1			23.4	0	0
TDP052	psfnmyg^YDLQTAK	0-0-1-1-1-0-0-0-0-0-0-0-0-0-0-0-0-0-1-0-0-0-0-0-0-0-0-0-0-0-0-0-0-0-0-0-0-0-0-0-0-0-1-1-0-0-0-1-0-0-0-0			21.7	0	0
TDP052	PSFNMYGYDLQTA^k	0-0-0-0-0-0-0-0-0-1-0-1-1-1-0-0-0-0-0-0-0-0-0-0-0-0-0-0-0-0-0-0-0-0-0-0-0-0-0-0-1-0-0-0-0-0-1-0-1-1-0-0			18.6	0	0
TDP052	PSFNMYGYDLQ^tak	0-0-0-0-0-0-0-0-0-1-0-0-0-0-0-0-0-0-0-0-0-0-0-0-0-0-0-0-0-0-0-0-0-0-1-0-0-0-0-1-1-1-0-0-0-0-1-0-1-1-1-0			22.4	0	0
TDP052	PSFNMYGYDLQT^ak	0-0-0-1-0-0-0-0-1-0-0-0-0-1-0-0-0-0-0-0-0-0-0-0-0-0-0-0-0-0-0-0-0-0-0-0-0-0-0-0-1-0-0-0-0-1-1-0-0-0-0-0			18.2	0	0
TDP052	PSFNMYGY^dlqtak	0-0-0-0-0-0-0-0-0-0-0-0-0-0-0-0-0-0-0-0-0-0-0-0-0-0-0-0-0-0-0-0-0-0-0-0-0-0-0-0-0-0-0-0-0-0-1-0-0-1-0-0			16.2	0	0
TDP053	LNGEAVMF	0-0-0-0-0-0-0-0-0-0-0-0-0-0-0-0-0-0-0-0-0-0-0-0-0-0-0-0-0-0-0-0-0-0-0-0-0-0-0-0-0-0-1-0-0-1-1-1-1-0-1-1			18.9	0	0
TDP053	RLNGEAVM	0-0-0-0-0-0-0-0-0-0-0-0-0-0-0-0-0-0-0-0-0-0-0-0-0-0-0-0-0-0-0-0-0-0-0-0-0-0-0-0-1-1-0-0-1-1-1-0-1-1-1-0			26.8	0	0																																										RLNGEAVM
TDP053	TRLNGEAV	1-0-1-0-0-1-1-1-1-1-1-1-1-1-1-0-1-1-1-1-0-0-0-1-0-0-1-0-0-1-1-0-0-0-1-1-0-1-0-0-1-1-1-0-1-1-1-1-1-1-1-0			28.9	0	0		TRLNGEAV		TRLNGEAV			TRLNGEAV	TRLNGEAV	TRLNGEAV	TRLNGEAV	TRLNGEAV	TRLNGEAV	TRLNGEAV	TRLNGEAV	TRLNGEAV	TRLNGEAV		TRLNGEAV	TRLNGEAV	TRLNGEAV	TRLNGEAV				TRLNGEAV			TRLNGEAV			TRLNGEAV	TRLNGEAV				TRLNGEAV	TRLNGEAV		TRLNGEAV			TRLNGEAV
TDP053	XYTRLNGE	0-0-0-0-0-0-0-0-0-0-0-0-0-0-0-0-0-0-0-0-0-0-0-0-0-0-0-0-0-0-0-0-0-0-0-0-0-0-0-0-1-1-0-0-0-0-1-0-1-1-0-0			36	0	0																																										XYTRLNGE
TDP053	YTRLNGEA	0-0-0-0-0-0-0-0-0-0-0-0-0-0-0-0-0-0-0-0-0-0-0-0-0-0-0-0-0-0-0-0-0-0-0-0-0-0-0-0-1-1-1-0-1-1-1-1-0-1-1-0			34.9	0	0																																										YTRLNGEA
TDP053	XXYTRLNG	0-0-0-0-0-0-0-0-0-0-0-0-0-0-0-0-0-0-0-0-0-0-0-0-0-0-0-0-0-0-0-0-0-0-0-0-0-0-0-0-1-1-1-0-0-0-1-0-0-1-2-0			25.2	0	0																																										XXYTRLNG
TDP053	AVMFMSKX	1-1-1-1-1-1-1-0-0-1-0-1-1-1-1-1-1-1-0-0-0-0-0-0-0-0-0-0-0-0-0-1-0-1-0-0-0-0-0-1-1-2-2-0-1-1-3-2-1-2-3-2			27.2	0	0		AVMFMSKX	AVMFMSKX	AVMFMSKX	AVMFMSKX	AVMFMSKX	AVMFMSKX	AVMFMSKX			AVMFMSKX		AVMFMSKX	AVMFMSKX	AVMFMSKX	AVMFMSKX	AVMFMSKX	AVMFMSKX	AVMFMSKX														AVMFMSKX		AVMFMSKX						AVMFMSKX	AVMFMSKX
TDP053	VMFMSKXX	0-0-0-0-0-0-0-0-0-0-0-0-0-0-0-0-0-0-0-0-0-0-0-0-0-0-0-0-0-0-0-0-0-0-0-0-0-0-0-0-0-1-0-0-0-1-0-0-1-1-2-0			21.3	0	0
TDP053	XXXYTRLN	0-0-0-0-0-0-0-0-0-0-0-0-0-0-0-0-0-0-0-1-1-1-0-0-0-0-0-0-0-0-0-0-0-0-0-0-0-0-0-0-1-0-0-0-1-1-2-1-0-0-1-1			33	0	0																					XXXYTRLN	XXXYTRLN	XXXYTRLN																			XXXYTRLN
TDP053	EAVMFMSK	0-0-1-1-1-0-0-0-0-1-0-0-0-1-0-0-0-1-0-0-0-0-0-0-0-0-0-0-0-0-0-0-0-0-0-0-0-0-0-0-1-1-0-0-1-1-1-0-0-1-1-1			18.8	0	0				EAVMFMSK	EAVMFMSK	EAVMFMSK					EAVMFMSK				EAVMFMSK				EAVMFMSK																							EAVMFMSK
TDP053	NGEAVMFM	0-0-0-1-1-0-0-0-0-0-0-0-0-0-0-0-0-0-0-0-0-0-0-0-0-0-0-0-0-0-0-0-0-0-0-0-0-0-0-0-0-0-0-0-0-0-2-1-0-0-0-0			18	0	0					NGEAVMFM	NGEAVMFM
TDP053	GEAVMFMS	0-0-1-1-1-0-0-0-0-0-0-0-1-1-0-0-0-0-0-0-0-0-0-0-0-0-0-0-0-0-0-0-0-0-0-0-0-0-0-0-1-1-1-1-0-1-1-1-1-1-1-1			22.9	0	0				GEAVMFMS	GEAVMFMS	GEAVMFMS								GEAVMFMS	GEAVMFMS																											GEAVMFMS
TDP053	MFMSKXXX	0-0-0-0-0-0-0-0-0-0-0-0-1-0-0-0-0-0-0-0-0-0-0-0-0-0-0-0-0-0-0-0-0-0-0-0-0-0-0-0-1-0-0-0-0-1-0-0-0-1-0-0			19.3	0	0														MFMSKXXX																												MFMSKXXX
--------
TDP053	ytr^LNGEAVMFMSK	0-0-0-0-0-0-0-0-0-0-0-0-0-0-0-0-0-0-0-0-0-0-0-0-0-0-0-0-0-0-0-0-0-0-0-0-0-0-0-0-1-1-0-0-0-0-1-0-1-1-0-0			36	0	0
TDP053	y^TRLNGEAVMFMSK	0-0-0-0-0-0-0-0-0-0-0-0-0-0-0-0-0-0-0-1-1-1-0-0-0-0-0-0-0-0-0-0-0-0-0-0-0-0-0-0-1-0-0-0-1-1-0-0-0-0-0-0			33	0	0
TDP053	ytrl^NGEAVMFMSK	0-0-0-0-0-0-0-0-0-0-0-0-0-0-0-0-0-0-0-0-0-0-0-0-0-0-0-0-0-0-0-0-0-0-0-0-0-0-0-0-1-1-1-0-1-1-1-1-0-1-1-0			34.9	0	0
TDP053	YTRLNGEAVMFMSK	1-1-1-1-1-1-1-1-1-1-1-1-1-1-1-1-1-1-1-1-1-1-1-1-1-1-1-1-1-1-1-1-1-1-1-1-1-1-1-1-1-1-1-1-1-1-1-1-1-1-1-1	3 times in 3 NECs		35.1	30.7	0
TDP053	ytrln^GEAVMFMSK	1-0-1-0-0-1-1-1-1-1-1-1-1-1-1-0-1-1-1-1-0-0-0-1-0-0-1-0-0-1-1-0-0-0-1-1-0-1-0-0-1-1-1-0-1-1-1-1-1-1-1-0			28.9	0	0
TDP053	yt^RLNGEAVMFMSK	0-0-0-0-0-0-0-0-0-0-0-0-0-0-0-0-0-0-0-0-0-0-0-0-0-0-0-0-0-0-0-0-0-0-0-0-0-0-0-0-1-0-0-0-0-0-0-0-0-0-0-0			25.2	0	0
TDP053	ytrlng^EAVMFMSK	0-0-0-0-0-0-0-0-0-0-0-0-0-0-0-0-0-0-0-0-0-0-0-0-0-0-0-0-0-0-0-0-0-0-0-0-0-0-0-0-1-1-0-0-1-1-1-0-1-1-1-0			26.8	0	0
TDP053	YTRLNGEAVMF^msk	1-1-1-1-1-1-1-0-0-1-0-1-1-1-1-1-1-1-0-0-0-0-0-0-0-0-0-0-0-0-0-1-0-1-0-0-0-0-0-1-1-1-1-0-1-1-1-1-1-1-1-1			27.2	0	0
TDP053	YTRLNGEAV^mfmsk	0-0-1-1-1-0-0-0-0-0-0-0-1-1-0-0-0-0-0-0-0-0-0-0-0-0-0-0-0-0-0-0-0-0-0-0-0-0-0-0-1-1-1-1-0-1-1-1-1-1-1-1			22.9	0	0
TDP053	YTRLNGE^avmfmsk	0-0-0-0-0-0-0-0-0-0-0-0-0-0-0-0-0-0-0-0-0-0-0-0-0-0-0-0-0-0-0-0-0-0-0-0-0-0-0-0-0-0-1-0-0-0-1-1-0-0-1-1			18.9	0	0
TDP053	yt^RLNGEAVMF^msk	0-0-0-0-0-0-0-0-0-0-0-0-0-0-0-0-0-0-0-0-0-0-0-0-0-0-0-0-0-0-0-0-0-0-0-0-0-0-0-0-0-1-1-0-0-0-1-0-0-1-1-0			23.2	0	0
TDP053	YTRLNGEAVMFM^sk	0-0-0-0-0-0-0-0-0-0-0-0-0-0-0-0-0-0-0-0-0-0-0-0-0-0-0-0-0-0-0-0-0-0-0-0-0-0-0-0-0-1-0-0-0-1-0-0-1-1-1-0			21.3	0	0
TDP053	y^TRLNGEAVMF^msk	0-0-0-0-0-0-0-0-0-0-0-0-0-0-0-0-0-0-0-0-0-0-0-0-0-0-0-0-0-0-0-0-0-0-0-0-0-0-0-0-0-0-0-0-0-0-1-1-0-0-1-1			18.7	0	0
TDP053	YTRLNGEA^vmfmsk	0-0-0-1-1-0-0-0-0-0-0-0-0-0-0-0-0-0-0-0-0-0-0-0-0-0-0-0-0-0-0-0-0-0-0-0-0-0-0-0-0-0-0-0-0-0-1-1-0-0-0-0			18	0	0
TDP053	ytrlnge^AVMFMSK	0-0-0-0-0-0-0-0-0-0-0-0-0-0-0-0-0-0-0-0-0-0-0-0-0-0-0-0-0-0-0-0-0-0-0-0-0-0-0-0-0-0-0-0-0-1-0-0-1-0-0-0			16.4	0	0
TDP053	yt^RLNGEAVMFM^sk	0-0-0-0-0-0-0-0-0-0-0-0-0-0-0-0-0-0-0-0-0-0-0-0-0-0-0-0-0-0-0-0-0-0-0-0-0-0-0-0-0-0-0-0-0-0-0-0-0-0-1-0			16.3	0	0
TDP053	YTRLNGEAVMFMS^k	0-0-0-0-0-0-0-0-0-0-0-0-1-0-0-0-0-0-0-0-0-0-0-0-0-0-0-0-0-0-0-0-0-0-0-0-0-0-0-0-1-0-0-0-0-1-0-0-0-1-0-0			19.3	0	0
TDP053	ytrlngea^VMFMSK	0-0-0-0-0-0-0-0-0-0-0-0-0-0-0-0-0-0-0-0-0-0-0-0-0-0-0-0-0-0-0-0-0-0-0-0-0-0-0-0-0-0-0-0-0-0-1-0-0-0-0-0			17.8	0	0
TDP053	YTRLNGEAVM^fmsk	0-0-1-1-1-0-0-0-0-1-0-0-0-1-0-0-0-1-0-0-0-0-0-0-0-0-0-0-0-0-0-0-0-0-0-0-0-0-0-0-1-1-0-0-1-1-0-0-0-1-1-1			18.8	0	0
TDP053	y^TRLNGEAVM^fmsk	0-0-0-0-0-0-0-0-0-0-0-0-0-0-0-0-0-0-0-0-0-0-0-0-0-0-0-0-0-0-0-0-0-0-0-0-0-0-0-0-0-0-0-0-0-0-1-0-0-0-0-0			15.4	0	0
TDP054	IEYKGKPT	0-0-0-0-0-0-0-0-0-0-0-0-0-0-0-0-0-0-0-0-0-0-0-0-0-0-0-0-0-0-0-0-0-0-0-0-0-0-0-0-1-1-0-1-0-0-0-0-0-0-1-1			17	0	0																																										IEYKGKPT
TDP054	EYKGKPTR	0-0-0-0-0-0-0-0-0-0-0-0-0-0-0-0-0-0-0-0-0-0-0-0-0-0-0-0-0-0-0-0-0-0-0-0-0-0-0-0-0-0-0-0-0-0-0-1-0-0-0-0			16.6	0	0
TDP054	GKPTRWQR	0-0-0-0-0-0-0-0-0-0-0-0-0-0-0-0-0-0-0-0-0-0-0-0-0-0-0-0-0-0-0-0-0-0-0-0-0-0-0-0-0-1-2-2-0-0-2-2-0-1-2-2			25	0	0
TDP054	KPTRWQRX	0-0-0-0-0-0-0-0-0-0-0-0-0-0-0-0-0-0-0-0-0-0-0-0-0-0-0-0-0-0-0-0-0-0-0-0-0-0-0-0-1-2-2-2-0-0-2-3-1-2-2-3			47.7	0	0																																										KPTRWQRX
TDP054	PTRWQRXX	0-0-0-0-0-0-0-0-0-0-0-0-0-0-0-0-0-0-0-0-0-0-0-0-0-0-0-0-0-0-0-0-0-0-0-0-0-0-0-0-2-1-3-1-0-1-3-3-2-2-3-3			35.2	0	0																																										PTRWQRXX
TDP054	TRWQRXXX	0-0-0-0-0-0-0-0-0-0-1-2-2-1-0-0-0-0-0-0-0-0-0-0-0-0-0-0-0-0-0-0-0-0-0-0-0-0-0-0-2-1-1-0-1-1-4-4-1-2-2-1			39.8	0	0												TRWQRXXX	TRWQRXXX	TRWQRXXX	TRWQRXXX																											TRWQRXXX
TDP054	XXESIEYK	0-0-0-0-0-0-0-0-0-0-0-0-0-0-0-0-0-0-0-0-0-0-0-0-0-0-0-0-0-0-0-0-0-0-0-0-0-0-0-0-0-0-0-0-0-0-1-1-0-0-0-0			16.3	0	0
TDP054	SIEYKGKP	0-0-0-0-0-0-0-0-0-0-0-0-0-0-0-0-0-0-0-0-0-0-0-0-0-0-0-0-0-0-0-0-0-0-0-0-0-0-0-0-0-0-0-0-0-0-1-0-0-0-1-0			17.7	0	0
TDP054	XXXESIEY	0-0-0-0-0-0-0-0-0-0-0-0-0-0-0-0-0-0-0-0-0-1-0-0-0-0-0-0-0-0-0-0-0-0-0-0-0-0-0-0-1-0-1-1-0-0-3-4-1-1-1-1			33.9	0	0																							XXXESIEY																			XXXESIEY
TDP054	ESIEYKGK	0-0-0-0-0-0-0-0-0-0-0-0-0-0-0-0-0-0-0-0-0-0-0-0-0-0-0-0-0-0-0-0-0-0-0-0-0-0-0-0-0-0-0-0-0-0-0-0-0-0-0-1			15.8	0	0
--------
TDP054	ESIEYKGKPTRWQR	2-2-2-2-2-2-2-2-2-2-2-2-2-2-2-2-2-2-2-2-2-2-2-1-2-2-2-2-2-2-2-2-2-2-2-2-2-2-2-2-2-2-0-0-2-2-2-0-2-2-2-0	6 times in 3 NECs		43.6	42.4	0
TDP054	ESIEYKGKPTR^wqr	0-0-0-0-0-0-0-0-0-0-0-0-0-0-0-0-0-0-0-0-0-0-0-0-0-0-0-0-0-0-0-0-0-0-0-0-0-0-0-0-1-2-2-2-0-0-2-2-1-2-2-2			47.7	0	0
TDP054	ESIEYKGKPTRW^qr	0-0-0-0-0-0-0-0-0-0-0-0-0-0-0-0-0-0-0-0-0-0-0-0-0-0-0-0-0-0-0-0-0-0-0-0-0-0-0-0-2-1-2-0-0-1-2-2-2-2-2-2			35.2	0	0
TDP054	e^SIEYKGKPTRWQR	0-0-0-0-0-0-0-0-0-0-0-0-0-0-0-0-0-0-0-0-0-1-0-0-0-0-0-0-0-0-0-0-0-0-0-0-0-0-0-0-1-0-0-0-0-0-1-0-1-1-0-0			30.8	0	0
TDP054	ESIEYKGKPTRWQ^r	0-0-0-0-0-0-0-0-0-0-1-2-2-1-0-0-0-0-0-0-0-0-0-0-0-0-0-0-0-0-0-0-0-0-0-0-0-0-0-0-2-1-1-0-1-1-2-2-1-2-2-1			39.8	0	0
TDP054	e^SIEYKGKPTR^wqr	0-0-0-0-0-0-0-0-0-0-0-0-0-0-0-0-0-0-0-0-0-0-0-0-0-0-0-0-0-0-0-0-0-0-0-0-0-0-0-0-0-0-0-0-0-0-0-1-0-0-0-1			33.9	0	0
TDP054	e^SIEYKGKPTRWQ^r	0-0-0-0-0-0-0-0-0-0-0-0-0-0-0-0-0-0-0-0-0-0-0-0-0-0-0-0-0-0-0-0-0-0-0-0-0-0-0-0-0-0-0-0-0-0-1-1-0-0-0-0			33.8	0	0
TDP054	e^SIEYKGKPTRW^qr	0-0-0-0-0-0-0-0-0-0-0-0-0-0-0-0-0-0-0-0-0-0-0-0-0-0-0-0-0-0-0-0-0-0-0-0-0-0-0-0-0-0-1-1-0-0-1-1-0-0-1-0			22.9	0	0
TDP054	ESIEYKGKPT^rwqr	0-0-0-0-0-0-0-0-0-0-0-0-0-0-0-0-0-0-0-0-0-0-0-0-0-0-0-0-0-0-0-0-0-0-0-0-0-0-0-0-0-1-2-2-0-0-2-1-0-1-2-2			25	0	0
TDP054	es^IEYKGKPTRWQ^r	0-0-0-0-0-0-0-0-0-0-0-0-0-0-0-0-0-0-0-0-0-0-0-0-0-0-0-0-0-0-0-0-0-0-0-0-0-0-0-0-0-0-0-0-0-0-1-1-0-0-0-0			16.3	0	0
TDP054	esie^YKGKPTRW^qr	0-0-0-0-0-0-0-0-0-0-0-0-0-0-0-0-0-0-0-0-0-0-0-0-0-0-0-0-0-0-0-0-0-0-0-0-0-0-0-0-0-0-0-0-0-0-0-0-0-0-0-1			15.8	0	0
TDP054	esiey^KGKPTRWQR	0-0-0-0-0-0-0-0-0-0-0-0-0-0-0-0-0-0-0-0-0-0-0-0-0-0-0-0-0-0-0-0-0-0-0-0-0-0-0-0-0-0-0-0-0-0-1-0-0-0-1-0			17.7	0	0
TDP054	ESIEYKG^kptrwqr	0-0-0-0-0-0-0-0-0-0-0-0-0-0-0-0-0-0-0-0-0-0-0-0-0-0-0-0-0-0-0-0-0-0-0-0-0-0-0-0-0-0-0-0-0-0-0-1-0-0-0-0			16.6	0	0
TDP054	e^SIEYKGKPT^rwqr	0-0-0-0-0-0-0-0-0-0-0-0-0-0-0-0-0-0-0-0-0-0-0-0-0-0-0-0-0-0-0-0-0-0-0-0-0-0-0-0-0-0-0-0-0-0-0-1-0-0-0-0			20.8	0	0
TDP054	esieyk^GKPTRWQR	0-0-0-0-0-0-0-0-0-0-0-0-0-0-0-0-0-0-0-0-0-0-0-0-0-0-0-0-0-0-0-0-0-0-0-0-0-0-0-0-1-0-0-0-0-0-0-0-0-0-0-0			15.9	0	0
TDP054	ESIEYK^gkptrwqr	0-0-0-0-0-0-0-0-0-0-0-0-0-0-0-0-0-0-0-0-0-0-0-0-0-0-0-0-0-0-0-0-0-0-0-0-0-0-0-0-0-1-0-1-0-0-0-0-0-0-1-1			17	0	0
TDP055	LNIHFKFD	0-0-0-0-0-0-0-0-0-0-0-0-0-0-0-0-0-0-0-0-0-0-0-0-0-0-0-0-0-0-0-0-0-0-0-0-0-0-0-0-0-1-1-0-1-1-2-1-0-1-1-1			25.6	0	0
TDP055	XXSSGMLN	0-0-0-0-0-0-0-0-0-0-0-0-0-0-0-0-0-0-0-0-0-0-0-0-0-0-0-0-0-0-0-0-0-0-0-0-0-0-0-0-0-0-0-0-0-0-0-0-0-1-1-0			17.1	0	0
TDP055	NIHFKFDW	0-1-1-1-1-0-0-0-0-0-0-0-0-1-0-0-0-1-0-0-0-0-0-0-0-0-0-0-0-0-0-0-0-0-0-0-0-0-0-0-1-1-0-0-1-1-2-0-1-2-2-1			26.9	0	0			NIHFKFDW	NIHFKFDW	NIHFKFDW	NIHFKFDW									NIHFKFDW				NIHFKFDW																							NIHFKFDW
TDP055	MLNIHFKF	0-0-0-0-0-0-0-0-0-0-0-0-0-0-0-0-0-0-0-0-0-0-0-0-0-0-0-0-0-0-0-0-0-0-0-0-0-0-0-0-0-0-0-0-0-1-1-0-0-0-0-0			15.9	0	0
TDP055	GMLNIHFK	0-0-0-0-0-0-0-0-0-0-0-0-0-0-0-0-0-1-0-0-0-0-0-0-0-0-0-0-0-0-0-0-0-0-0-0-0-0-0-0-0-0-0-0-0-1-0-0-0-1-0-0			21.3	0	0																			GMLNIHFK
TDP055	XSSGMLNI	0-0-0-0-0-0-0-0-0-0-0-0-0-0-0-0-0-0-0-0-0-0-0-0-0-0-0-0-0-0-0-0-0-0-0-0-0-0-0-0-0-0-0-0-0-0-1-0-0-0-0-0			15.4	0	0
TDP055	SGMLNIHF	0-0-0-0-0-0-0-0-0-0-0-0-0-0-0-0-0-0-0-0-0-0-0-0-0-0-0-0-0-0-0-0-0-0-0-0-0-0-0-0-1-1-1-1-1-1-2-2-1-0-0-1			25.9	0	0																																										SGMLNIHF
TDP055	FKFDWRXX	0-0-0-0-0-0-0-0-0-0-0-0-0-0-0-0-0-0-0-0-0-0-0-0-0-0-0-0-0-0-0-0-0-0-0-0-0-0-0-0-1-1-0-0-1-1-2-1-0-1-1-0			28.2	0	0																																										FKFDWRXX
TDP055	IHFKFDWR	0-0-0-0-0-0-0-0-0-0-0-0-0-0-0-0-0-0-0-0-0-0-0-0-0-0-0-0-0-0-0-0-0-0-0-0-0-0-0-0-0-0-0-0-0-0-0-1-0-0-0-0			17.7	0	0
TDP055	HFKFDWRX	0-0-0-1-1-0-0-0-0-0-0-0-0-0-0-0-0-0-0-0-0-0-0-0-0-0-0-0-0-0-0-0-0-0-0-0-0-0-0-0-0-1-0-0-0-1-1-0-0-0-1-0			25.6	0	0					HFKFDWRX	HFKFDWRX
TDP055	KFDWRXXX	0-0-0-0-0-0-0-0-1-0-0-0-0-0-0-0-0-0-0-0-0-0-0-0-0-0-0-0-0-0-0-0-0-0-0-0-0-0-0-0-0-0-0-0-0-0-0-0-0-0-0-0			15.6	0	0										KFDWRXXX
--------
TDP055	SSGMLNIHFKFDWR	0-0-0-0-0-0-0-0-0-0-1-1-0-0-0-0-0-0-0-0-0-0-0-0-0-0-0-0-0-0-0-0-1-0-0-0-0-0-0-0-0-0-0-0-1-1-1-0-0-1-0-0	1 times in 3 NECs		47.8	35.8	0
TDP055	ssgmln^IHFKFDWR	0-0-0-0-0-0-0-0-0-0-0-0-0-0-0-0-0-1-0-0-0-0-0-0-0-0-0-0-0-0-0-0-0-0-0-0-0-0-0-0-0-0-0-0-0-1-0-0-0-1-0-0			21.3	0	0
TDP055	SSGMLNIHFKFD^wr	0-0-0-0-0-0-0-0-0-0-0-0-0-0-0-0-0-0-0-0-0-0-0-0-0-0-0-0-0-0-0-0-0-0-0-0-0-0-0-0-1-1-0-0-1-1-1-0-0-1-1-0			28.2	0	0
TDP055	ssgml^NIHFKFDWR	0-0-0-0-0-0-0-0-0-0-0-0-0-0-0-0-0-0-0-0-0-0-0-0-0-0-0-0-0-0-0-0-0-0-0-0-0-0-0-0-1-1-1-1-1-1-1-1-1-0-0-1			25.9	0	0
TDP055	SSGMLNIHFKF^dwr	0-0-0-1-1-0-0-0-0-0-0-0-0-0-0-0-0-0-0-0-0-0-0-0-0-0-0-0-0-0-0-0-0-0-0-0-0-0-0-0-0-1-0-0-0-1-1-0-0-0-1-0			25.6	0	0
TDP055	SSGMLNIHF^kfdwr	0-1-1-1-1-0-0-0-0-0-0-0-0-1-0-0-0-1-0-0-0-0-0-0-0-0-0-0-0-0-0-0-0-0-0-0-0-0-0-0-1-1-0-0-1-1-1-0-1-1-1-1			26.9	0	0
TDP055	SSGMLNIH^fkfdwr	0-0-0-0-0-0-0-0-0-0-0-0-0-0-0-0-0-0-0-0-0-0-0-0-0-0-0-0-0-0-0-0-0-0-0-0-0-0-0-0-0-1-1-0-1-1-1-1-0-1-1-0			25.6	0	0
TDP055	SSGMLNIHFK^fdwr	0-0-0-0-0-0-0-0-0-0-0-0-0-0-0-0-0-0-0-0-0-0-0-0-0-0-0-0-0-0-0-0-0-0-0-0-0-0-0-0-0-0-0-0-0-0-0-1-0-0-0-0			17.7	0	0
TDP055	ssgml^NIHFKFD^wr	0-0-0-0-0-0-0-0-0-0-0-0-0-0-0-0-0-0-0-0-0-0-0-0-0-0-0-0-0-0-0-0-0-0-0-0-0-0-0-0-0-0-0-0-0-0-1-1-0-0-0-0			16.4	0	0
TDP055	ss^GMLNIHF^kfdwr	0-0-0-0-0-0-0-0-0-0-0-0-0-0-0-0-0-0-0-0-0-0-0-0-0-0-0-0-0-0-0-0-0-0-0-0-0-0-0-0-0-0-0-0-0-0-0-0-0-1-1-0			17.1	0	0
TDP055	ssgmlnih^FKFDWR	0-0-0-0-0-0-0-0-0-0-0-0-0-0-0-0-0-0-0-0-0-0-0-0-0-0-0-0-0-0-0-0-0-0-0-0-0-0-0-0-0-0-0-0-0-0-1-0-0-0-0-1			18	0	0
TDP055	ssgmlni^HFKFDWR	0-0-0-0-0-0-0-0-0-0-0-0-0-0-0-0-0-0-0-0-0-0-0-0-0-0-0-0-0-0-0-0-0-0-0-0-0-0-0-0-0-0-0-0-0-1-1-0-0-0-0-0			15.9	0	0
TDP055	SSGMLNIHFKFDW^r	0-0-0-0-0-0-0-0-1-0-0-0-0-0-0-0-0-0-0-0-0-0-0-0-0-0-0-0-0-0-0-0-0-0-0-0-0-0-0-0-0-0-0-0-0-0-0-0-0-0-0-0			15.6	0	0
TDP055	ssg^MLNIHF^kfdwr	0-0-0-0-0-0-0-0-0-0-0-0-0-0-0-0-0-0-0-0-0-0-0-0-0-0-0-0-0-0-0-0-0-0-0-0-0-0-0-0-0-0-0-0-0-0-1-0-0-0-0-0			15.4	0	0
TDP056	IKVYDWAF	0-0-0-0-0-0-0-0-0-0-0-0-0-0-0-0-0-0-0-0-0-0-0-0-0-0-0-0-0-0-0-0-0-0-0-0-0-0-0-0-0-1-1-0-0-0-2-0-0-1-0-0			19.9	0	0
TDP056	RIRSGTXX	0-0-0-0-0-0-0-0-0-0-0-0-1-1-0-0-0-0-0-0-0-0-0-0-0-0-0-0-0-0-0-0-0-0-0-0-0-0-0-0-1-3-1-0-1-1-3-0-1-1-0-0			23.9	0	0														RIRSGTXX	RIRSGTXX																											RIRSGTXX
TDP056	VYDWAFRI	0-1-0-1-0-0-0-0-0-0-0-0-0-0-0-0-0-0-0-0-0-0-0-0-0-0-0-0-0-0-0-0-0-0-0-0-0-0-0-0-0-0-0-0-0-0-0-0-1-1-1-0			15.5	0	0			VYDWAFRI		VYDWAFRI
TDP056	DWAFRIRS	0-0-0-0-0-0-0-0-0-0-0-0-0-0-0-0-0-0-0-0-0-0-0-0-0-0-0-0-0-0-0-0-0-0-0-0-0-0-0-0-1-1-0-0-0-0-0-0-0-0-0-0			15.8	0	0																																										DWAFRIRS
TDP056	WAFRIRSG	0-0-0-0-0-0-0-0-0-0-0-0-0-0-0-0-0-0-0-0-0-0-0-0-0-0-0-0-0-0-0-0-0-0-0-0-0-0-0-0-1-2-3-0-1-1-3-1-1-1-2-2			34	0	0																																										WAFRIRSG
TDP056	AFRIRSGT	0-0-0-0-0-0-0-0-0-0-0-0-0-0-0-0-0-0-0-0-0-0-0-0-0-0-0-0-0-0-0-0-0-0-0-0-0-0-0-0-1-0-0-0-0-1-1-0-0-0-1-0			18.1	0	0																																										AFRIRSGT
TDP056	FRIRSGTX	0-0-0-0-0-1-1-0-0-1-1-0-1-1-0-0-0-0-0-1-0-0-0-0-0-0-0-0-0-0-0-1-0-0-1-0-0-0-0-1-1-2-0-0-1-2-2-0-1-2-2-0	1 times in 3 NECs		45.1	20.4	0							FRIRSGTX	FRIRSGTX			FRIRSGTX	FRIRSGTX		FRIRSGTX	FRIRSGTX						FRIRSGTX												FRIRSGTX			FRIRSGTX					FRIRSGTX	FRIRSGTX
TDP056	IRSGTXXX	1-1-0-0-0-1-0-0-1-1-1-1-0-0-1-1-0-0-1-1-0-0-0-0-0-0-1-0-0-1-0-1-0-1-1-0-1-0-0-1-1-0-0-0-1-0-0-0-1-0-0-0	1 times in 3 NECs		26.3	18	0		IRSGTXXX	IRSGTXXX				IRSGTXXX			IRSGTXXX	IRSGTXXX	IRSGTXXX	IRSGTXXX			IRSGTXXX	IRSGTXXX			IRSGTXXX	IRSGTXXX							IRSGTXXX			IRSGTXXX		IRSGTXXX		IRSGTXXX	IRSGTXXX		IRSGTXXX			IRSGTXXX	IRSGTXXX
TDP056	XXXIKVYD	0-0-1-0-0-1-0-0-0-0-0-0-0-0-0-0-0-0-0-0-0-0-0-0-0-0-0-0-0-0-0-0-0-0-0-0-0-0-0-0-0-1-0-0-0-0-1-0-0-0-0-0	2 times in 3 NECs		20.3	15.8	0				XXXIKVYD			XXXIKVYD
TDP056	XXIKVYDW	0-1-0-0-0-0-0-1-0-0-0-1-0-0-0-0-0-0-0-0-0-0-0-0-0-0-0-0-0-0-0-0-1-0-0-0-0-0-0-0-1-1-1-0-1-1-3-1-0-2-0-1			28.8	0	0			XXIKVYDW						XXIKVYDW				XXIKVYDW																					XXIKVYDW								XXIKVYDW
TDP056	XIKVYDWA	0-0-0-0-0-0-0-0-0-0-0-0-0-0-0-0-0-0-0-0-0-0-0-0-0-0-0-0-0-0-0-0-0-0-0-0-0-0-0-0-0-1-1-0-0-0-0-0-0-0-2-1			22.5	0	0
--------
TDP056	IKVYDWAFRIR^sgt	0-0-0-0-0-1-1-0-0-1-1-0-1-1-0-0-0-0-0-1-0-0-0-0-0-0-0-0-0-0-0-1-0-0-1-0-0-0-0-1-1-1-0-0-1-1-1-0-1-1-1-0	1 times in 3 NECs		45.1	20.4	0
TDP056	IKVYDWAFR^irsgt	0-0-0-0-0-0-0-0-0-0-0-0-0-0-0-0-0-0-0-0-0-0-0-0-0-0-0-0-0-0-0-0-0-0-0-0-0-0-0-0-1-1-1-0-1-1-1-0-1-1-1-0			34	0	0
TDP056	IKVYDWAFRIRSG^t	1-1-0-0-0-1-0-0-1-1-1-1-0-0-1-1-0-0-1-1-0-0-0-0-0-0-1-0-0-1-0-1-0-1-1-0-1-0-0-1-1-0-0-0-1-0-0-0-1-0-0-0	1 times in 3 NECs		26.3	18	0
TDP056	ik^VYDWAFR^irsgt	0-0-0-0-0-0-0-0-0-0-0-0-0-0-0-0-0-0-0-0-0-0-0-0-0-0-0-0-0-0-0-0-0-0-0-0-0-0-0-0-0-1-1-0-0-0-1-1-0-0-0-1			25.4	0	0
TDP056	IKVYDWAFRIRSGT	1-1-1-1-1-1-1-1-1-1-1-1-1-1-1-1-1-1-1-1-1-1-1-1-1-1-1-1-1-1-1-1-1-1-1-1-1-1-1-1-1-1-0-0-1-1-0-0-1-1-1-0	3 times in 3 NECs		28	21.4	0
TDP056	ik^VYDWAFRIR^sgt	0-0-0-0-0-0-0-0-0-0-0-0-0-0-0-0-0-0-0-0-0-0-0-0-0-0-0-0-0-0-0-0-0-0-0-0-0-0-0-0-0-0-0-0-0-1-1-0-0-1-0-0			28.8	0	0
TDP056	ikv^YDWAFRIR^sgt	0-0-0-0-0-0-0-0-0-0-0-0-0-0-0-0-0-0-0-0-0-0-0-0-0-0-0-0-0-0-0-0-0-0-0-0-0-0-0-0-0-1-0-0-0-0-0-0-0-0-1-0			22.5	0	0
TDP056	ikv^YDWAFR^irsgt	0-0-0-0-0-0-0-0-0-0-0-0-0-0-0-0-0-0-0-0-0-0-0-0-0-0-0-0-0-0-0-0-0-0-0-0-0-0-0-0-0-0-1-0-0-0-0-0-0-0-1-1			20.2	0	0
TDP056	ik^VYDWAFRIRSGT	0-1-0-0-0-0-0-1-0-0-0-1-0-0-0-0-0-0-0-0-0-0-0-0-0-0-0-0-0-0-0-0-1-0-0-0-0-0-0-0-1-0-0-0-1-0-0-0-0-1-0-0			18.4	0	0
TDP056	IKVYDWAFRIRS^gt	0-0-0-0-0-0-0-0-0-0-0-0-1-1-0-0-0-0-0-0-0-0-0-0-0-0-0-0-0-0-0-0-0-0-0-0-0-0-0-0-1-1-0-0-1-1-1-0-1-1-0-0			23.9	0	0
TDP056	i^KVYDWAFR^irsgt	0-0-0-0-0-0-0-0-0-0-0-0-0-0-0-0-0-0-0-0-0-0-0-0-0-0-0-0-0-0-0-0-0-0-0-0-0-0-0-0-0-0-0-0-0-0-1-0-0-0-0-0			20.3	0	0
TDP056	i^KVYDWAFRIRSGT	0-0-1-0-0-1-0-0-0-0-0-0-0-0-0-0-0-0-0-0-0-0-0-0-0-0-0-0-0-0-0-0-0-0-0-0-0-0-0-0-0-0-0-0-0-0-0-0-0-0-0-0	2 times in 3 NECs		16.7	15.8	0
TDP056	ikvy^DWAFRIRSGT	0-0-0-0-0-0-0-0-0-0-0-0-0-0-0-0-0-0-0-0-0-0-0-0-0-0-0-0-0-0-0-0-0-0-0-0-0-0-0-0-0-0-0-0-0-0-1-0-0-1-0-0			19.9	0	0
TDP056	IKVYDWAFRI^rsgt	0-0-0-0-0-0-0-0-0-0-0-0-0-0-0-0-0-0-0-0-0-0-0-0-0-0-0-0-0-0-0-0-0-0-0-0-0-0-0-0-1-0-0-0-0-1-1-0-0-0-1-0			18.1	0	0
TDP056	IKVYDW^afrirsgt	0-1-0-1-0-0-0-0-0-0-0-0-0-0-0-0-0-0-0-0-0-0-0-0-0-0-0-0-0-0-0-0-0-0-0-0-0-0-0-0-0-0-0-0-0-0-0-0-1-1-1-0			15.5	0	0
TDP056	i^KVYDWAFRIRS^gt	0-0-0-0-0-0-0-0-0-0-0-0-0-0-0-0-0-0-0-0-0-0-0-0-0-0-0-0-0-0-0-0-0-0-0-0-0-0-0-0-0-1-0-0-0-0-0-0-0-0-0-0			15.6	0	0
TDP056	IKVYDWAF^rirsgt	0-0-0-0-0-0-0-0-0-0-0-0-0-0-0-0-0-0-0-0-0-0-0-0-0-0-0-0-0-0-0-0-0-0-0-0-0-0-0-0-1-1-0-0-0-0-0-0-0-0-0-0			15.8	0	0
TDP056	ikvy^DWAFRIRS^gt	0-0-0-0-0-0-0-0-0-0-0-0-0-0-0-0-0-0-0-0-0-0-0-0-0-0-0-0-0-0-0-0-0-0-0-0-0-0-0-0-0-1-1-0-0-0-1-0-0-0-0-0			18.6	0	0
TDP056	ik^VYDWAFRIRS^gt	0-0-0-0-0-0-0-0-0-0-0-0-0-0-0-0-0-0-0-0-0-0-0-0-0-0-0-0-0-0-0-0-0-0-0-0-0-0-0-0-0-0-0-0-0-0-1-0-0-0-0-0			15.4	0	0
TDP057	XXGRDLHT	1-0-0-0-1-1-1-1-1-1-1-1-1-0-1-1-1-1-1-1-1-1-0-1-0-0-1-1-0-1-0-1-1-1-1-1-1-0-1-1-1-1-1-0-1-1-0-0-0-1-1-1	3 times in 3 NECs		26.8	22.9	0		XXGRDLHT				XXGRDLHT	XXGRDLHT	XXGRDLHT	XXGRDLHT	XXGRDLHT	XXGRDLHT	XXGRDLHT	XXGRDLHT	XXGRDLHT		XXGRDLHT	XXGRDLHT	XXGRDLHT	XXGRDLHT	XXGRDLHT	XXGRDLHT	XXGRDLHT	XXGRDLHT		XXGRDLHT			XXGRDLHT	XXGRDLHT		XXGRDLHT		XXGRDLHT	XXGRDLHT	XXGRDLHT	XXGRDLHT	XXGRDLHT	XXGRDLHT		XXGRDLHT	XXGRDLHT	XXGRDLHT
TDP057	HTVTAESL	0-0-0-0-0-0-0-0-0-0-0-0-0-0-0-0-0-0-0-0-0-0-0-0-0-0-0-0-0-0-0-0-0-0-0-0-0-0-0-0-0-0-0-0-0-0-0-2-0-0-0-0			17.7	0	0
TDP057	TVTAESLM	0-0-0-0-1-0-0-0-0-0-0-0-0-0-0-0-0-0-0-0-0-0-0-0-0-0-0-0-0-0-0-0-0-0-0-0-0-0-0-0-1-0-0-0-0-0-1-1-0-0-1-0			23.1	0	0						TVTAESLM																																				TVTAESLM
TDP057	VTAESLMS	0-0-0-0-1-0-0-0-0-0-0-0-0-0-0-0-0-0-0-0-0-0-0-0-0-0-0-0-0-0-0-0-0-0-0-0-0-0-0-0-1-0-1-0-0-0-1-2-1-1-1-0			20.6	0	0						VTAESLMS																																				VTAESLMS
TDP057	TAESLMSX	0-0-0-0-0-0-0-0-0-0-0-0-0-0-0-0-0-0-0-0-0-0-0-0-0-0-0-0-0-0-0-0-0-0-0-0-0-0-0-1-0-0-0-0-0-0-1-2-0-0-1-0			20.8	0	0																																									TAESLMSX
TDP057	AESLMSXX	1-1-1-1-1-0-1-0-1-1-0-1-1-1-0-0-0-0-0-0-0-0-0-0-0-0-0-0-0-0-0-0-0-0-1-0-0-0-0-1-0-1-1-0-0-0-1-1-1-1-1-0			29.8	0	0		AESLMSXX	AESLMSXX	AESLMSXX	AESLMSXX	AESLMSXX		AESLMSXX		AESLMSXX	AESLMSXX		AESLMSXX	AESLMSXX	AESLMSXX																					AESLMSXX					AESLMSXX
TDP057	ESLMSXXX	0-0-0-1-1-0-1-0-0-1-0-1-1-1-0-0-0-0-0-0-0-0-0-0-0-0-0-0-0-0-0-0-0-0-0-0-0-1-0-0-0-0-0-0-0-0-1-0-0-1-0-0			30.2	0	0					ESLMSXXX	ESLMSXXX		ESLMSXXX			ESLMSXXX		ESLMSXXX	ESLMSXXX	ESLMSXXX																								ESLMSXXX
TDP057	GRDLHTVT	0-0-0-0-1-0-0-0-0-0-0-0-0-0-0-0-0-0-0-0-0-0-0-0-0-0-0-0-0-0-0-0-0-0-0-0-0-0-0-0-0-0-1-0-0-0-0-0-0-0-1-0			20.2	0	0						GRDLHTVT
TDP057	XGRDLHTV	0-0-0-0-0-0-0-0-0-0-0-0-0-0-0-0-0-0-0-0-0-0-0-0-0-0-0-0-0-0-0-0-0-0-0-0-0-0-0-0-1-1-0-0-0-0-1-1-1-1-1-1			21	0	0																																										XGRDLHTV
TDP057	XXXGRDLH	1-0-1-0-1-1-0-1-1-1-1-1-1-1-1-1-1-1-0-1-1-1-0-0-0-0-1-1-0-0-0-1-0-0-1-1-0-1-0-1-0-0-0-0-0-1-1-4-1-1-1-0	3 times in 3 NECs		41.3	37.2	0		XXXGRDLH		XXXGRDLH		XXXGRDLH	XXXGRDLH		XXXGRDLH	XXXGRDLH	XXXGRDLH	XXXGRDLH	XXXGRDLH	XXXGRDLH	XXXGRDLH	XXXGRDLH	XXXGRDLH	XXXGRDLH	XXXGRDLH		XXXGRDLH	XXXGRDLH	XXXGRDLH					XXXGRDLH	XXXGRDLH				XXXGRDLH			XXXGRDLH	XXXGRDLH		XXXGRDLH		XXXGRDLH
--------
TDP057	g^RDLHTVTAESLMS	1-0-1-0-1-1-0-1-1-1-1-1-1-1-1-1-1-1-0-1-1-1-0-0-0-0-1-1-0-0-0-1-0-0-1-1-0-1-0-1-0-0-0-0-0-1-1-1-1-1-1-0	3 times in 3 NECs		41.3	37.2	0
TDP057	gr^DLHTVTAESLMS	1-0-0-0-1-1-1-1-1-1-1-1-1-0-1-1-1-1-1-1-1-1-0-1-0-0-1-1-0-1-0-1-1-1-1-1-1-0-1-1-1-1-1-0-1-1-0-0-0-1-1-1	3 times in 3 NECs		26.8	22.9	0
TDP057	GRDLHTVTAESLMS	1-1-1-1-1-1-1-1-1-1-1-1-1-1-1-1-1-1-1-1-1-1-1-1-1-1-1-1-1-1-1-1-1-1-1-1-1-1-1-1-1-1-1-0-1-1-1-1-1-1-1-1	3 times in 3 NECs		36.4	34.3	0
TDP057	grdl^HTVTAESLMS	0-0-0-0-1-0-0-0-0-0-0-0-0-0-0-0-0-0-0-0-0-0-0-0-0-0-0-0-0-0-0-0-0-0-0-0-0-0-0-0-0-0-1-0-0-0-0-0-0-0-1-0			20.2	0	0
TDP057	g^RDLHTVTAES^lms	0-0-0-0-0-0-0-0-0-0-0-0-0-0-0-0-0-0-0-0-0-0-0-0-0-0-0-0-0-0-0-0-0-0-0-0-0-0-0-0-0-0-0-0-0-0-0-1-0-0-0-0			16.3	0	0
TDP057	GRDLHTVTA^eslms	0-0-0-0-1-0-0-0-0-0-0-0-0-0-0-0-0-0-0-0-0-0-0-0-0-0-0-0-0-0-0-0-0-0-0-0-0-0-0-0-1-0-0-0-0-0-1-1-0-0-1-0			23.1	0	0
TDP057	GRDLHTVTAESLM^s	0-0-0-1-1-0-1-0-0-1-0-1-1-1-0-0-0-0-0-0-0-0-0-0-0-0-0-0-0-0-0-0-0-0-0-0-0-1-0-0-0-0-0-0-0-0-1-0-0-1-0-0			30.2	0	0
TDP057	grd^LHTVTAESLMS	0-0-0-0-0-0-0-0-0-0-0-0-0-0-0-0-0-0-0-0-0-0-0-0-0-0-0-0-0-0-0-0-0-0-0-0-0-0-0-0-1-1-0-0-0-0-1-1-1-1-1-1			21	0	0
TDP057	GRDLHTVTAES^lms	0-0-0-0-0-0-0-0-0-0-0-0-0-0-0-0-0-0-0-0-0-0-0-0-0-0-0-0-0-0-0-0-0-0-0-0-0-0-0-1-0-0-0-0-0-0-1-1-0-0-1-0			20.8	0	0
TDP057	GRDLHTVTAESL^ms	1-1-1-1-1-0-1-0-1-1-0-1-1-1-0-0-0-0-0-0-0-0-0-0-0-0-0-0-0-0-0-0-0-0-1-0-0-0-0-1-0-1-1-0-0-0-1-1-1-1-1-0			29.8	0	0
TDP057	GRDLHTVTAE^slms	0-0-0-0-1-0-0-0-0-0-0-0-0-0-0-0-0-0-0-0-0-0-0-0-0-0-0-0-0-0-0-0-0-0-0-0-0-0-0-0-1-0-1-0-0-0-1-1-1-1-1-0			20.6	0	0
TDP057	g^RDLHTVTAE^slms	0-0-0-0-0-0-0-0-0-0-0-0-0-0-0-0-0-0-0-0-0-0-0-0-0-0-0-0-0-0-0-0-0-0-0-0-0-0-0-0-0-0-0-0-0-0-0-1-0-0-0-0			20.1	0	0
TDP057	GRDLHTVT^aeslms	0-0-0-0-0-0-0-0-0-0-0-0-0-0-0-0-0-0-0-0-0-0-0-0-0-0-0-0-0-0-0-0-0-0-0-0-0-0-0-0-0-0-0-0-0-0-0-1-0-0-0-0			16	0	0
TDP057	g^RDLHTVT^aeslms	0-0-0-0-0-0-0-0-0-0-0-0-0-0-0-0-0-0-0-0-0-0-0-0-0-0-0-0-0-0-0-0-0-0-0-0-0-0-0-0-0-0-0-0-0-0-0-1-0-0-0-0			17.7	0	0
TDP058	YKEQTNGN	0-0-0-0-0-0-0-0-0-0-0-0-0-0-0-0-0-0-0-0-0-0-0-0-0-0-0-0-0-0-0-0-0-0-0-0-0-0-0-0-0-0-0-0-0-0-1-0-0-0-0-0			17.5	0	0
TDP058	EQTNGNHV	0-0-0-0-0-0-0-0-0-0-0-0-0-0-0-0-0-1-0-0-0-0-0-0-0-0-0-0-0-0-0-0-0-0-0-0-0-0-0-0-0-0-0-0-0-0-0-0-0-0-0-0			15.6	0	0																			EQTNGNHV
TDP058	TNGNHVSX	0-0-0-0-1-0-0-0-0-1-0-0-1-1-0-0-0-0-0-0-0-0-0-0-0-0-0-0-0-0-0-0-0-0-0-0-0-0-0-0-0-0-0-0-0-0-0-0-0-0-0-0			19.2	0	0						TNGNHVSX					TNGNHVSX			TNGNHVSX	TNGNHVSX
TDP058	NGNHVSXX	1-0-0-0-0-0-0-0-0-0-0-0-0-0-0-0-1-0-0-0-0-0-0-0-0-0-0-0-0-0-0-0-0-0-0-0-0-0-0-0-0-0-0-0-0-0-0-0-0-0-0-0			18.7	0	0		NGNHVSXX																NGNHVSXX
TDP058	XXXMRAYK	0-0-0-0-0-0-0-1-0-0-1-0-1-0-0-1-1-0-0-0-0-0-0-0-0-0-0-0-0-0-1-0-0-0-0-1-0-0-0-0-0-0-0-0-0-0-0-0-0-0-0-0	1 times in 3 NECs		22.9	23	0									XXXMRAYK			XXXMRAYK		XXXMRAYK			XXXMRAYK	XXXMRAYK														XXXMRAYK					XXXMRAYK
--------
TDP058	m^RAYKEQTNGNHVS	0-0-0-0-0-0-0-1-0-0-1-0-1-0-0-1-1-0-0-0-0-0-0-0-0-0-0-0-0-0-1-0-0-0-0-1-0-0-0-0-0-0-0-0-0-0-0-0-0-0-0-0	1 times in 3 NECs		22.9	23	0
TDP058	MRAYKEQTNGNHVS	1-1-1-1-1-1-1-1-1-1-1-1-1-1-1-1-1-1-1-1-1-1-1-1-1-1-1-1-1-1-1-1-1-1-1-1-1-1-1-1-1-1-0-0-0-1-1-0-1-1-0-0	3 times in 3 NECs		30.4	26.3	0
TDP058	MRAYKEQTNGNH^vs	1-0-0-0-0-0-0-0-0-0-0-0-0-0-0-0-1-0-0-0-0-0-0-0-0-0-0-0-0-0-0-0-0-0-0-0-0-0-0-0-0-0-0-0-0-0-0-0-0-0-0-0			18.7	0	0
TDP058	MRAYKEQTNGN^hvs	0-0-0-0-1-0-0-0-0-1-0-0-1-1-0-0-0-0-0-0-0-0-0-0-0-0-0-0-0-0-0-0-0-0-0-0-0-0-0-0-0-0-0-0-0-0-0-0-0-0-0-0			19.2	0	0
TDP058	MRAYKEQ^tngnhvs	0-0-0-0-0-0-0-0-0-0-0-0-0-0-0-0-0-0-0-0-0-0-0-0-0-0-0-0-0-0-0-0-0-0-0-0-0-0-0-0-0-0-0-0-0-0-1-0-0-0-0-0			17.5	0	0
TDP058	MRAYKEQTN^gnhvs	0-0-0-0-0-0-0-0-0-0-0-0-0-0-0-0-0-1-0-0-0-0-0-0-0-0-0-0-0-0-0-0-0-0-0-0-0-0-0-0-0-0-0-0-0-0-0-0-0-0-0-0			15.6	0	0
TDP059	MGPFHIVK	0-0-0-0-0-0-0-0-0-0-0-0-0-0-0-0-0-0-0-0-0-0-0-0-0-0-0-0-0-0-0-0-0-0-0-0-0-0-0-0-1-1-1-0-1-0-1-0-1-1-1-1			17.3	0	0																																										MGPFHIVK
TDP059	GPFHIVKW	0-0-0-0-0-0-0-0-0-0-0-0-0-0-0-0-0-0-0-0-0-0-0-0-0-0-0-0-0-0-0-0-0-0-0-0-0-0-0-0-2-2-3-0-0-1-2-2-0-1-1-2			27.9	0	0																																										GPFHIVKW
TDP059	FHIVKWAS	0-0-0-0-0-0-0-0-0-0-0-0-0-1-0-0-0-0-0-0-0-0-0-0-0-0-0-0-0-0-0-0-0-0-0-0-0-0-0-0-0-0-0-0-1-1-2-1-1-1-2-0			22.2	0	0															FHIVKWAS
TDP059	HIVKWASX	0-0-0-1-1-0-0-0-1-1-1-1-1-1-0-0-0-0-0-0-0-0-0-0-0-0-0-0-0-0-0-0-0-0-0-0-0-0-0-0-1-1-2-0-1-4-5-2-1-2-2-0			34	0	0					HIVKWASX	HIVKWASX				HIVKWASX	HIVKWASX	HIVKWASX	HIVKWASX	HIVKWASX	HIVKWASX																											HIVKWASX
TDP059	IVKWASXX	0-0-0-0-0-0-0-0-0-0-0-0-1-1-0-0-0-0-0-0-0-0-0-0-0-0-0-0-0-0-0-0-0-0-0-0-0-0-0-0-4-4-1-0-2-5-5-0-4-4-5-0			32.4	0	0														IVKWASXX	IVKWASXX																											IVKWASXX
TDP059	VKWASXXX	0-0-0-0-0-0-0-0-0-0-0-1-1-1-0-0-0-0-0-0-0-0-0-0-0-0-0-0-0-0-0-0-0-0-0-0-0-0-0-0-0-0-0-0-0-0-0-0-0-0-0-0			19.6	0	0													VKWASXXX	VKWASXXX	VKWASXXX
TDP059	GMGPFHIV	0-0-0-0-0-0-0-0-0-0-0-0-0-0-0-0-0-0-0-0-0-0-0-0-0-0-0-0-0-0-0-0-0-0-0-0-0-0-0-0-0-0-1-0-0-0-0-0-0-0-1-0			16.7	0	0
TDP059	XXAKGMGP	0-0-0-0-0-0-0-0-0-0-0-0-0-0-0-0-0-0-0-0-0-0-0-0-0-0-0-0-0-0-0-0-0-0-0-0-0-0-0-0-1-0-2-0-0-2-3-1-1-2-2-0			24.5	0	0																																										XXAKGMGP
TDP059	AKGMGPFH	0-0-0-0-0-0-0-0-0-0-0-0-0-0-0-0-0-0-0-1-1-1-0-0-0-0-0-0-0-0-0-0-0-0-0-0-0-0-0-0-0-1-0-0-0-3-2-2-0-1-2-0			23.7	0	0																					AKGMGPFH	AKGMGPFH	AKGMGPFH
TDP059	XXXAKGMG	0-0-0-1-0-1-0-0-0-0-1-1-0-0-0-0-1-0-0-0-0-1-0-0-0-0-0-0-0-0-0-0-0-1-1-0-1-0-0-1-2-2-1-0-2-2-3-1-2-0-0-1	1 times in 3 NECs		30.6	17.6	0					XXXAKGMG		XXXAKGMG					XXXAKGMG	XXXAKGMG					XXXAKGMG					XXXAKGMG												XXXAKGMG	XXXAKGMG		XXXAKGMG			XXXAKGMG	XXXAKGMG
TDP059	XAKGMGPF	0-0-0-0-0-0-0-0-0-0-0-0-0-0-0-0-0-0-0-0-0-0-0-0-0-0-0-0-0-0-0-0-0-0-0-0-0-0-0-0-1-1-0-0-0-1-2-0-1-1-1-0			24.9	0	0																																										XAKGMGPF
--------
TDP059	AKGMGPFHIVK^was	0-0-0-1-1-0-0-0-1-1-1-1-1-1-0-0-0-0-0-0-0-0-0-0-0-0-0-0-0-0-0-0-0-0-0-0-0-0-0-0-1-1-1-0-1-1-1-0-1-1-1-0			34	0	0
TDP059	AKGMGPFHIVKW^as	0-0-0-0-0-0-0-0-0-0-0-0-1-1-0-0-0-0-0-0-0-0-0-0-0-0-0-0-0-0-0-0-0-0-0-0-0-0-0-0-1-1-0-0-1-1-1-0-1-1-1-0			32.4	0	0
TDP059	AKGMGPFHIVKWAS	1-1-1-1-1-1-1-1-1-1-1-1-1-0-1-1-1-1-1-1-1-1-1-1-1-1-1-1-1-1-1-1-1-1-1-1-1-1-1-1-1-0-0-0-1-1-0-0-1-1-0-0	3 times in 3 NECs		26.9	22	0
TDP059	akgm^GPFHIVKWAS	0-0-0-0-0-0-0-0-0-0-0-0-0-0-0-0-0-0-0-1-1-1-0-0-0-0-0-0-0-0-0-0-0-0-0-0-0-0-0-0-0-0-0-0-0-1-0-0-0-0-0-0			23.7	0	0
TDP059	ak^GMGPFHIVKW^as	0-0-0-0-0-0-0-0-0-0-0-0-0-0-0-0-0-0-0-0-0-0-0-0-0-0-0-0-0-0-0-0-0-0-0-0-0-0-0-0-1-0-0-0-0-1-1-0-1-1-1-0			24.5	0	0
TDP059	AKGMGPFH^ivkwas	0-0-0-0-0-0-0-0-0-0-0-0-0-0-0-0-0-0-0-0-0-0-0-0-0-0-0-0-0-0-0-0-0-0-0-0-0-0-0-0-1-1-1-0-0-1-1-1-0-1-1-1			27.9	0	0
TDP059	a^KGMGPFHIVKW^as	0-0-0-0-0-0-0-0-0-0-0-0-0-0-0-0-0-0-0-0-0-0-0-0-0-0-0-0-0-0-0-0-0-0-0-0-0-0-0-0-1-1-0-0-1-1-1-0-1-0-0-0			30.6	0	0
TDP059	akgm^GPFHIVKW^as	0-0-0-0-0-0-0-0-0-0-0-0-0-0-0-0-0-0-0-0-0-0-0-0-0-0-0-0-0-0-0-0-0-0-0-0-0-0-0-0-0-1-0-0-0-1-1-0-0-1-1-0			22.3	0	0
TDP059	a^KGMGPFHIVK^was	0-0-0-0-0-0-0-0-0-0-0-0-0-0-0-0-0-0-0-0-0-0-0-0-0-0-0-0-0-0-0-0-0-0-0-0-0-0-0-0-0-0-0-0-0-1-1-0-0-0-0-0			23.3	0	0
TDP059	AKGMGPFHIVKWA^s	0-0-0-0-0-0-0-0-0-0-0-1-1-1-0-0-0-0-0-0-0-0-0-0-0-0-0-0-0-0-0-0-0-0-0-0-0-0-0-0-0-0-0-0-0-0-0-0-0-0-0-0			19.6	0	0
TDP059	ak^GMGPFHIVK^was	0-0-0-0-0-0-0-0-0-0-0-0-0-0-0-0-0-0-0-0-0-0-0-0-0-0-0-0-0-0-0-0-0-0-0-0-0-0-0-0-0-0-1-0-0-1-1-1-0-1-1-0			22	0	0
TDP059	akg^MGPFHIVKW^as	0-0-0-0-0-0-0-0-0-0-0-0-0-0-0-0-0-0-0-0-0-0-0-0-0-0-0-0-0-0-0-0-0-0-0-0-0-0-0-0-1-1-0-0-0-1-1-0-1-1-1-0			24.9	0	0
TDP059	a^KGMGPFHIVKWAS	0-0-0-1-0-1-0-0-0-0-1-1-0-0-0-0-1-0-0-0-0-1-0-0-0-0-0-0-0-0-0-0-0-1-1-0-1-0-0-1-1-0-0-0-1-0-0-0-1-0-0-0	1 times in 3 NECs		21.4	17.6	0
TDP059	akgm^GPFHIVK^was	0-0-0-0-0-0-0-0-0-0-0-0-0-0-0-0-0-0-0-0-0-0-0-0-0-0-0-0-0-0-0-0-0-0-0-0-0-0-0-0-0-0-0-0-0-1-1-1-0-0-0-0			22.5	0	0
TDP059	akg^MGPFHIVK^was	0-0-0-0-0-0-0-0-0-0-0-0-0-0-0-0-0-0-0-0-0-0-0-0-0-0-0-0-0-0-0-0-0-0-0-0-0-0-0-0-0-0-0-0-0-0-1-0-0-0-0-0			19.3	0	0
TDP059	AKGMGPFHIV^kwas	0-0-0-0-0-0-0-0-0-0-0-0-0-1-0-0-0-0-0-0-0-0-0-0-0-0-0-0-0-0-0-0-0-0-0-0-0-0-0-0-0-0-0-0-1-1-1-0-1-1-1-0			22.2	0	0
TDP059	AKGMGPF^hivkwas	0-0-0-0-0-0-0-0-0-0-0-0-0-0-0-0-0-0-0-0-0-0-0-0-0-0-0-0-0-0-0-0-0-0-0-0-0-0-0-0-1-1-1-0-1-0-1-0-1-1-1-1			17.3	0	0
TDP059	ak^GMGPFHIV^kwas	0-0-0-0-0-0-0-0-0-0-0-0-0-0-0-0-0-0-0-0-0-0-0-0-0-0-0-0-0-0-0-0-0-0-0-0-0-0-0-0-0-0-0-0-0-0-1-0-0-0-0-0			18.1	0	0
TDP059	akgm^GPFHIV^kwas	0-0-0-0-0-0-0-0-0-0-0-0-0-0-0-0-0-0-0-0-0-0-0-0-0-0-0-0-0-0-0-0-0-0-0-0-0-0-0-0-0-0-0-0-0-0-0-1-0-0-1-0			15.4	0	0
TDP059	a^KGMGPFH^ivkwas	0-0-0-0-0-0-0-0-0-0-0-0-0-0-0-0-0-0-0-0-0-0-0-0-0-0-0-0-0-0-0-0-0-0-0-0-0-0-0-0-0-1-1-0-0-0-1-1-0-0-0-1			21.6	0	0
TDP059	akgmgp^FHIVKW^as	0-0-0-0-0-0-0-0-0-0-0-0-0-0-0-0-0-0-0-0-0-0-0-0-0-0-0-0-0-0-0-0-0-0-0-0-0-0-0-0-0-0-1-0-0-0-0-0-0-0-1-0			16.7	0	0
TDP059	akgmgpfh^IVKWAS	0-0-0-0-0-0-0-0-0-0-0-0-0-0-0-0-0-0-0-0-0-0-0-0-0-0-0-0-0-0-0-0-0-0-0-0-0-0-0-0-1-0-0-0-0-0-0-0-0-0-0-0			16.5	0	0
TDP059	ak^GMGPFH^ivkwas	0-0-0-0-0-0-0-0-0-0-0-0-0-0-0-0-0-0-0-0-0-0-0-0-0-0-0-0-0-0-0-0-0-0-0-0-0-0-0-0-0-0-1-0-0-0-0-0-0-0-0-0			16.2	0	0
TDP060	XXXRKWQS	0-0-0-0-0-0-0-0-0-0-0-0-0-0-0-0-0-0-0-0-0-0-0-0-0-0-0-0-0-0-0-0-0-0-0-0-0-0-0-0-0-1-0-0-0-0-3-1-0-0-1-0			34	0	0
TDP060	PQVDLYDK	0-0-0-1-1-0-0-0-0-0-0-0-1-0-0-0-1-1-0-0-0-0-0-0-0-0-0-0-0-0-0-0-0-0-0-0-0-0-0-0-1-0-1-0-0-0-2-1-0-1-1-1			23.7	0	0					PQVDLYDK	PQVDLYDK								PQVDLYDK				PQVDLYDK	PQVDLYDK																							PQVDLYDK
TDP060	VDLYDKSX	0-0-0-1-0-0-0-0-0-0-0-0-0-0-0-0-0-0-0-0-0-0-0-0-0-0-0-0-0-0-0-0-0-0-0-0-0-0-0-0-1-1-1-0-1-1-3-0-1-1-1-0			33	0	0					VDLYDKSX																																					VDLYDKSX
TDP060	XRKWQSPQ	1-1-1-1-0-1-0-1-1-0-1-1-1-0-0-1-0-0-1-0-1-0-0-0-0-0-1-1-1-1-1-0-0-0-1-0-0-1-0-1-0-1-1-1-1-0-1-1-1-0-2-1			33	0	0		XRKWQSPQ	XRKWQSPQ	XRKWQSPQ	XRKWQSPQ		XRKWQSPQ		XRKWQSPQ	XRKWQSPQ		XRKWQSPQ	XRKWQSPQ	XRKWQSPQ			XRKWQSPQ			XRKWQSPQ		XRKWQSPQ						XRKWQSPQ	XRKWQSPQ	XRKWQSPQ	XRKWQSPQ	XRKWQSPQ				XRKWQSPQ			XRKWQSPQ		XRKWQSPQ
TDP060	WQSPQVDL	0-0-0-0-0-0-0-0-0-0-0-0-0-0-0-0-0-0-0-0-0-0-0-0-0-0-0-0-0-1-0-0-0-0-0-0-0-0-0-0-1-0-0-1-0-0-1-1-1-0-1-1			22.6	0	0																															WQSPQVDL											WQSPQVDL
TDP060	QVDLYDKS	0-1-1-1-1-0-0-0-0-0-0-0-0-0-0-0-0-0-0-0-0-0-0-0-0-0-0-0-0-0-0-0-0-0-0-0-0-0-0-0-0-1-1-0-0-0-1-0-0-1-1-0			32	0	0			QVDLYDKS	QVDLYDKS	QVDLYDKS	QVDLYDKS
TDP060	DLYDKSXX	0-0-0-1-0-0-0-0-0-0-0-1-1-1-0-0-0-0-0-0-0-0-0-0-0-0-0-0-0-0-0-0-0-1-0-0-0-0-0-1-0-1-0-0-0-1-1-0-0-1-1-0	1 times in 3 NECs		25.6	15.7	0					DLYDKSXX								DLYDKSXX	DLYDKSXX	DLYDKSXX																				DLYDKSXX						DLYDKSXX
TDP060	LYDKSXXX	0-0-1-1-0-0-0-0-1-1-1-1-0-1-0-0-0-0-0-0-0-0-0-0-0-0-0-0-0-0-0-0-0-0-0-0-0-0-0-0-0-0-0-0-0-0-0-0-0-0-0-0			35.9	0	0				LYDKSXXX	LYDKSXXX					LYDKSXXX	LYDKSXXX	LYDKSXXX	LYDKSXXX		LYDKSXXX
TDP060	RKWQSPQV	0-0-0-0-0-0-0-0-0-0-0-0-0-0-0-0-0-0-0-0-0-0-0-0-0-0-0-0-0-0-0-0-0-0-0-0-0-0-0-0-1-1-0-1-0-1-2-1-1-1-1-1			33.1	0	0																																										RKWQSPQV
TDP060	QSPQVDLY	0-0-0-0-0-0-0-0-0-0-0-0-0-0-0-0-0-0-0-0-0-0-0-0-0-0-0-0-0-0-0-0-0-0-0-0-0-0-0-0-0-1-1-1-0-0-1-1-0-0-1-1			20.6	0	0
TDP060	XXRKWQSP	0-0-0-0-0-0-0-0-0-0-0-0-0-0-0-0-0-0-0-0-0-0-0-0-0-0-0-0-0-0-0-0-0-0-0-0-0-0-0-0-0-1-1-0-0-0-0-0-0-1-1-1			29	0	0
--------
TDP060	RKWQSPQVDLYDKS	1-1-1-1-1-1-1-1-1-1-1-1-1-1-1-1-1-1-1-1-1-1-1-1-1-1-1-1-1-1-1-1-1-1-1-1-1-1-1-1-1-1-1-0-1-1-1-0-1-1-1-0	3 times in 3 NECs		54.1	36.4	0
TDP060	r^KWQSPQVDLYDKS	0-0-0-0-0-0-0-0-0-0-0-0-0-0-0-0-0-0-0-0-0-0-0-0-0-0-0-0-0-0-0-0-0-0-0-0-0-0-0-0-0-1-0-0-0-0-1-0-0-0-1-0			34	0	0
TDP060	RKWQSPQVDLYDK^s	0-0-1-1-0-0-0-0-1-1-1-1-0-1-0-0-0-0-0-0-0-0-0-0-0-0-0-0-0-0-0-0-0-0-0-0-0-0-0-0-0-0-0-0-0-0-0-0-0-0-0-0			35.9	0	0
TDP060	rkw^QSPQVDLYDKS	1-1-1-1-0-1-0-1-1-0-1-1-1-0-0-1-0-0-1-0-1-0-0-0-0-0-1-1-1-1-1-0-0-0-1-0-0-1-0-1-0-1-1-1-1-0-1-1-1-0-2-1			33	0	0
TDP060	rk^WQSPQVDLYDKS	0-0-0-0-0-0-0-0-0-0-0-0-0-0-0-0-0-0-0-0-0-0-0-0-0-0-0-0-0-0-0-0-0-0-0-0-0-0-0-0-0-1-1-0-0-0-0-0-0-1-1-1			29	0	0
TDP060	rkwq^SPQVDLYDKS	0-0-0-0-0-0-0-0-0-0-0-0-0-0-0-0-0-0-0-0-0-0-0-0-0-0-0-0-0-0-0-0-0-0-0-0-0-0-0-0-1-1-0-1-0-1-1-1-1-1-1-1			33.1	0	0
TDP060	RKWQSPQVDLY^dks	0-0-0-1-0-0-0-0-0-0-0-0-0-0-0-0-0-0-0-0-0-0-0-0-0-0-0-0-0-0-0-0-0-0-0-0-0-0-0-0-1-1-1-0-1-1-1-0-1-1-1-0			33	0	0
TDP060	RKWQSPQVDLYD^ks	0-0-0-1-0-0-0-0-0-0-0-1-1-1-0-0-0-0-0-0-0-0-0-0-0-0-0-0-0-0-0-0-0-1-0-0-0-0-0-1-0-1-0-0-0-1-1-0-0-1-1-0	1 times in 3 NECs		25.6	15.7	0
TDP060	RKWQSPQVDL^ydks	0-1-1-1-1-0-0-0-0-0-0-0-0-0-0-0-0-0-0-0-0-0-0-0-0-0-0-0-0-0-0-0-0-0-0-0-0-0-0-0-0-1-1-0-0-0-1-0-0-1-1-0			32	0	0
TDP060	rkwqsp^QVDLYDKS	0-0-0-0-0-0-0-0-0-0-0-0-0-0-0-0-0-0-0-0-0-0-0-0-0-0-0-0-0-1-0-0-0-0-0-0-0-0-0-0-1-0-0-1-0-0-1-1-1-0-1-1			22.6	0	0
TDP060	r^KWQSPQVDLY^dks	0-0-0-0-0-0-0-0-0-0-0-0-0-0-0-0-0-0-0-0-0-0-0-0-0-0-0-0-0-0-0-0-0-0-0-0-0-0-0-0-0-0-0-0-0-0-1-0-0-0-0-0			20.7	0	0
TDP060	rkwqspq^VDLYDKS	0-0-0-0-0-0-0-0-0-0-0-0-0-0-0-0-0-0-0-0-0-0-0-0-0-0-0-0-0-0-0-0-0-0-0-0-0-0-0-0-0-1-1-1-0-0-1-1-0-0-1-1			20.6	0	0
TDP060	RKWQSPQVD^lydks	0-0-0-1-1-0-0-0-0-0-0-0-1-0-0-0-1-1-0-0-0-0-0-0-0-0-0-0-0-0-0-0-0-0-0-0-0-0-0-0-1-0-1-0-0-0-1-0-0-1-1-1			23.7	0	0
TDP060	rkwq^SPQVDLY^dks	0-0-0-0-0-0-0-0-0-0-0-0-0-0-0-0-0-0-0-0-0-0-0-0-0-0-0-0-0-0-0-0-0-0-0-0-0-0-0-0-0-0-0-0-0-0-1-0-0-0-0-0			16.5	0	0
TDP060	r^KWQSPQVD^lydks	0-0-0-0-0-0-0-0-0-0-0-0-0-0-0-0-0-0-0-0-0-0-0-0-0-0-0-0-0-0-0-0-0-0-0-0-0-0-0-0-0-0-0-0-0-0-1-1-0-0-0-0			15.6	0	0
TDP061	QKESAEYN	0-0-0-0-0-0-0-0-0-0-0-0-0-0-0-0-0-0-0-0-0-0-0-0-0-0-0-0-0-0-0-0-0-0-0-0-0-0-0-0-0-0-0-2-0-0-1-1-0-1-1-1			22.5	0	0
TDP061	PTRLHSXX	0-0-0-1-1-0-0-0-0-0-0-0-0-0-0-0-0-0-0-0-0-0-0-0-0-0-0-0-0-0-0-0-0-0-0-0-0-0-0-0-0-1-1-4-1-1-0-0-0-2-1-2			38.5	0	0					PTRLHSXX	PTRLHSXX
TDP061	XXQKESAE	0-1-0-0-0-1-0-0-0-0-1-0-0-0-0-1-1-0-0-0-0-0-0-0-0-0-0-0-0-0-0-0-1-1-0-1-0-0-0-0-0-0-0-0-0-0-1-1-1-1-0-0			22.4	0	0			XXQKESAE				XXQKESAE					XXQKESAE					XXQKESAE	XXQKESAE																XXQKESAE	XXQKESAE		XXQKESAE
TDP061	KESAEYNP	0-0-0-0-0-0-0-0-0-0-0-0-0-0-0-0-0-0-0-0-0-0-0-0-0-0-0-0-0-0-0-0-0-0-0-0-0-0-0-0-0-0-1-2-0-0-1-2-0-0-1-3			25.4	0	0
TDP061	TRLHSXXX	0-0-0-0-0-0-0-0-0-0-0-0-1-2-0-0-0-0-0-0-0-0-0-0-0-0-0-0-0-0-0-0-0-0-0-0-0-0-0-0-0-0-0-0-0-0-1-1-0-0-0-1			33.7	0	0														TRLHSXXX	TRLHSXXX
TDP061	XXXQKESA	0-0-0-0-0-1-0-1-0-0-0-1-0-0-0-1-0-0-0-0-0-0-0-0-0-0-0-0-0-0-0-0-0-0-0-0-0-0-0-0-0-0-0-1-0-0-1-1-1-0-1-0			29.5	0	0							XXXQKESA		XXXQKESA				XXXQKESA				XXXQKESA
TDP061	EYNPTRLH	0-0-0-0-0-0-0-0-0-0-0-0-0-0-0-0-0-0-0-0-0-0-0-0-0-0-0-0-0-0-0-0-0-0-0-0-0-0-0-0-0-0-0-0-0-0-0-1-0-0-0-0			16.8	0	0
TDP061	YNPTRLHS	0-0-0-0-0-0-0-0-0-0-0-0-0-0-0-0-0-0-0-0-0-0-0-0-0-0-0-0-0-0-0-0-0-0-0-0-0-0-0-0-1-0-1-1-0-0-0-1-1-1-1-1			20.8	0	0																																										YNPTRLHS
TDP061	NPTRLHSX	0-0-0-0-0-0-0-0-0-0-0-0-0-0-0-0-0-0-0-0-0-0-0-0-0-0-0-0-0-0-0-0-0-0-0-0-0-0-0-0-1-1-1-2-1-1-2-2-0-1-0-2			33.6	0	0																																										NPTRLHSX
TDP061	XQKESAEY	0-0-0-0-0-0-0-0-0-0-0-0-0-0-0-0-0-0-0-0-0-0-0-0-0-0-0-0-0-0-0-0-0-0-0-0-0-0-0-0-1-1-0-2-0-0-1-2-0-1-1-2			25	0	0																																										XQKESAEY
TDP061	ESAEYNPT	0-0-0-0-0-0-0-0-0-0-0-0-0-0-0-0-0-0-0-0-0-0-0-0-0-0-0-0-0-0-0-0-0-0-0-0-0-0-0-0-0-0-0-0-0-0-1-0-0-0-1-0			17.7	0	0
--------
TDP061	QKESAEYNPTRLHS	2-2-2-2-2-2-2-2-2-2-2-2-2-2-2-2-2-2-2-2-2-2-2-2-1-1-2-2-2-2-2-2-2-2-1-2-2-2-2-2-2-1-2-0-1-2-2-2-2-2-2-1	6 times in 3 NECs		48.4	35.1	0
TDP061	QKESAEYNPTR^lhs	0-0-0-0-0-0-0-0-0-0-0-0-0-0-0-0-0-0-0-0-0-0-0-0-0-0-0-0-0-0-0-0-0-0-0-0-0-0-0-0-1-1-1-2-1-1-2-1-0-1-0-2			33.6	0	0
TDP061	QKESAEYNPTRL^hs	0-0-0-1-1-0-0-0-0-0-0-0-0-0-0-0-0-0-0-0-0-0-0-0-0-0-0-0-0-0-0-0-0-0-0-0-0-0-0-0-0-1-1-1-1-1-0-0-0-2-1-0			38.5	0	0
TDP061	QKESAEYNPTRLH^s	0-0-0-0-0-0-0-0-0-0-0-0-1-2-0-0-0-0-0-0-0-0-0-0-0-0-0-0-0-0-0-0-0-0-0-0-0-0-0-0-0-0-0-0-0-0-1-0-0-0-0-0			33.7	0	0
TDP061	qk^ESAEYNPTRLHS	0-1-0-0-0-1-0-0-0-0-1-0-0-0-0-1-1-0-0-0-0-0-0-0-0-0-0-0-0-0-0-0-1-1-0-1-0-0-0-0-0-0-0-0-0-0-1-1-1-1-0-0			22.4	0	0
TDP061	qke^SAEYNPTRLHS	0-0-0-0-0-0-0-0-0-0-0-0-0-0-0-0-0-0-0-0-0-0-0-0-0-0-0-0-0-0-0-0-0-0-0-0-0-0-0-0-1-1-0-1-0-0-1-1-0-1-1-1			25	0	0
TDP061	q^KESAEYNPTRLHS	0-0-0-0-0-1-0-1-0-0-0-1-0-0-0-1-0-0-0-0-0-0-0-0-0-0-0-0-0-0-0-0-0-0-0-0-0-0-0-0-0-0-0-1-0-0-1-1-1-0-1-0			29.5	0	0
TDP061	qkesa^EYNPTRLHS	0-0-0-0-0-0-0-0-0-0-0-0-0-0-0-0-0-0-0-0-0-0-0-0-0-0-0-0-0-0-0-0-0-0-0-0-0-0-0-0-0-0-1-1-0-0-1-1-0-0-1-1			25.4	0	0
TDP061	QKESAEYNPT^rlhs	0-0-0-0-0-0-0-0-0-0-0-0-0-0-0-0-0-0-0-0-0-0-0-0-0-0-0-0-0-0-0-0-0-0-0-0-0-0-0-0-1-0-1-1-0-0-0-1-1-1-1-1			20.8	0	0
TDP061	qke^SAEYNPTR^lhs	0-0-0-0-0-0-0-0-0-0-0-0-0-0-0-0-0-0-0-0-0-0-0-0-0-0-0-0-0-0-0-0-0-0-0-0-0-0-0-0-0-0-0-0-0-0-0-1-0-0-0-0			23.2	0	0
TDP061	qkes^AEYNPTRLHS	0-0-0-0-0-0-0-0-0-0-0-0-0-0-0-0-0-0-0-0-0-0-0-0-0-0-0-0-0-0-0-0-0-0-0-0-0-0-0-0-0-0-0-1-0-0-1-1-0-1-1-1			22.5	0	0
TDP061	qkesa^EYNPTRLH^s	0-0-0-0-0-0-0-0-0-0-0-0-0-0-0-0-0-0-0-0-0-0-0-0-0-0-0-0-0-0-0-0-0-0-0-0-0-0-0-0-0-0-0-0-0-0-0-1-0-0-0-1			16.9	0	0
TDP061	qkesa^EYNPTRL^hs	0-0-0-0-0-0-0-0-0-0-0-0-0-0-0-0-0-0-0-0-0-0-0-0-0-0-0-0-0-0-0-0-0-0-0-0-0-0-0-0-0-0-0-1-0-0-0-0-0-0-0-1			16.2	0	0
TDP061	qkes^AEYNPTRL^hs	0-0-0-0-0-0-0-0-0-0-0-0-0-0-0-0-0-0-0-0-0-0-0-0-0-0-0-0-0-0-0-0-0-0-0-0-0-0-0-0-0-0-0-1-0-0-0-0-0-0-0-0			18.9	0	0
TDP061	QKESAEYNP^trlhs	0-0-0-0-0-0-0-0-0-0-0-0-0-0-0-0-0-0-0-0-0-0-0-0-0-0-0-0-0-0-0-0-0-0-0-0-0-0-0-0-0-0-0-0-0-0-0-1-0-0-0-0			16.8	0	0
TDP061	qke^SAEYNPTRL^hs	0-0-0-0-0-0-0-0-0-0-0-0-0-0-0-0-0-0-0-0-0-0-0-0-0-0-0-0-0-0-0-0-0-0-0-0-0-0-0-0-0-0-0-1-0-0-0-0-0-0-0-1			18.3	0	0
TDP061	qkesae^YNPTRLHS	0-0-0-0-0-0-0-0-0-0-0-0-0-0-0-0-0-0-0-0-0-0-0-0-0-0-0-0-0-0-0-0-0-0-0-0-0-0-0-0-0-0-0-0-0-0-1-0-0-0-1-0			17.7	0	0
TDP062	TKGPKYEH	0-0-0-0-0-0-0-0-0-0-0-0-0-0-0-0-0-0-0-0-0-0-0-0-0-0-0-0-0-0-0-0-0-0-0-0-0-0-0-0-0-0-0-1-0-0-0-1-0-0-0-1			20.8	0	0
TDP062	GPKYEHSS	0-0-0-0-0-0-0-0-0-0-0-0-0-0-0-0-0-0-0-0-0-0-0-0-0-0-0-0-0-0-0-0-0-0-0-0-0-0-0-0-0-1-1-1-0-0-1-2-0-0-0-1			25.8	0	0
TDP062	PKYEHSSX	0-0-0-0-0-0-0-0-0-0-0-0-0-0-0-0-0-0-0-0-0-0-0-0-0-0-0-0-0-0-0-0-0-0-0-0-0-0-0-0-0-0-1-0-0-0-1-1-0-0-1-2			24.4	0	0
TDP062	KYEHSSXX	0-0-0-1-0-0-0-0-0-1-0-0-0-1-0-0-0-0-0-0-0-0-0-0-0-0-0-0-0-0-0-0-0-0-0-0-0-0-0-0-0-0-0-0-0-0-0-0-0-0-0-1			27.5	0	0					KYEHSSXX						KYEHSSXX				KYEHSSXX
TDP062	XDKQFTKG	0-0-0-0-0-0-0-0-0-0-0-0-0-0-0-0-0-0-0-0-0-0-0-0-0-0-0-0-0-0-0-0-0-0-0-0-0-0-0-0-0-0-1-0-0-0-0-1-0-0-1-1			20.8	0	0
TDP062	XXXDKQFT	0-0-0-0-0-0-0-0-0-0-0-0-0-0-0-0-0-0-0-0-0-0-0-0-0-0-0-0-0-0-0-0-0-0-0-0-0-0-0-0-0-0-0-0-0-0-0-1-0-0-0-0			17.2	0	0
--------
TDP062	DKQFTKGPKYEH^ss	0-0-0-1-0-0-0-0-0-1-0-0-0-1-0-0-0-0-0-0-0-0-0-0-0-0-0-0-0-0-0-0-0-0-0-0-0-0-0-0-0-0-0-0-0-0-0-0-0-0-0-1			27.5	0	0
TDP062	DKQFTKGPKYEHSS	1-1-1-1-1-1-1-1-1-1-1-1-1-1-1-1-1-1-1-1-1-1-1-1-1-1-1-1-1-1-1-1-1-1-1-1-1-1-1-1-1-0-0-1-1-1-1-1-1-1-1-1	3 times in 3 NECs		29.8	23.2	0
TDP062	DKQFTKGPKYE^hss	0-0-0-0-0-0-0-0-0-0-0-0-0-0-0-0-0-0-0-0-0-0-0-0-0-0-0-0-0-0-0-0-0-0-0-0-0-0-0-0-0-0-1-0-0-0-1-1-0-0-1-1			24.4	0	0
TDP062	DKQFTKGPKY^ehss	0-0-0-0-0-0-0-0-0-0-0-0-0-0-0-0-0-0-0-0-0-0-0-0-0-0-0-0-0-0-0-0-0-0-0-0-0-0-0-0-0-1-1-1-0-0-1-1-0-0-0-1			25.8	0	0
TDP062	dkq^FTKGPKYEHSS	0-0-0-0-0-0-0-0-0-0-0-0-0-0-0-0-0-0-0-0-0-0-0-0-0-0-0-0-0-0-0-0-0-0-0-0-0-0-0-0-0-0-1-0-0-0-0-1-0-0-1-0			20.8	0	0
TDP062	dkq^FTKGPKYE^hss	0-0-0-0-0-0-0-0-0-0-0-0-0-0-0-0-0-0-0-0-0-0-0-0-0-0-0-0-0-0-0-0-0-0-0-0-0-0-0-0-0-0-0-0-0-0-0-0-0-0-0-1			15.5	0	0
TDP062	d^KQFTKGPKY^ehss	0-0-0-0-0-0-0-0-0-0-0-0-0-0-0-0-0-0-0-0-0-0-0-0-0-0-0-0-0-0-0-0-0-0-0-0-0-0-0-0-0-0-0-0-0-0-0-1-0-0-0-0			17.2	0	0
TDP062	DKQFTKGP^kyehss	0-0-0-0-0-0-0-0-0-0-0-0-0-0-0-0-0-0-0-0-0-0-0-0-0-0-0-0-0-0-0-0-0-0-0-0-0-0-0-0-0-0-0-1-0-0-0-1-0-0-0-1			20.8	0	0
TDP063	XXXSKLGQ	0-0-0-0-0-0-0-0-0-0-0-0-0-0-0-0-0-0-0-0-0-0-0-0-0-0-0-0-0-0-0-0-0-0-0-0-0-0-0-0-0-0-0-0-0-0-1-0-0-1-0-0			20.2	0	0
TDP063	XXSKLGQR	0-0-0-0-0-0-0-0-0-0-0-0-0-0-0-0-0-0-0-0-0-0-0-0-0-0-0-0-0-0-0-0-0-0-0-0-0-0-0-0-0-0-0-2-0-0-1-3-1-0-1-2			24.7	0	0
TDP063	RPTDNYEP	1-0-1-0-1-0-1-0-1-0-0-0-0-1-1-1-1-0-0-0-0-0-0-0-0-0-0-0-0-0-1-0-1-1-0-1-0-1-0-0-1-0-0-2-0-0-1-2-0-0-1-2	1 times in 3 NECs		23.6	16.3	0		RPTDNYEP		RPTDNYEP		RPTDNYEP		RPTDNYEP		RPTDNYEP					RPTDNYEP	RPTDNYEP	RPTDNYEP	RPTDNYEP														RPTDNYEP		RPTDNYEP	RPTDNYEP		RPTDNYEP		RPTDNYEP			RPTDNYEP
TDP063	TDNYEPSX	0-0-0-0-0-0-0-0-0-0-0-0-0-0-0-0-0-0-0-0-0-0-0-0-0-0-0-0-0-0-0-0-0-0-0-0-0-0-0-0-0-0-0-2-0-0-1-2-0-0-0-0			28.3	0	0
TDP063	KLGQRPTD	0-0-0-0-0-0-0-0-0-0-0-0-0-0-0-0-0-0-0-0-0-0-0-0-0-0-0-0-0-0-0-0-0-0-0-0-0-0-0-0-0-0-0-1-0-0-1-1-0-0-0-0			19.2	0	0
TDP063	GQRPTDNY	0-0-0-0-0-0-0-0-0-0-0-0-0-0-0-0-0-0-0-0-0-0-0-0-0-0-0-0-0-0-0-0-0-0-0-0-0-0-0-0-0-0-0-1-0-0-0-1-0-0-0-1			19.3	0	0
TDP063	QRPTDNYE	0-0-0-0-0-0-0-0-0-0-0-0-0-0-0-0-0-0-0-0-0-0-0-0-0-0-0-0-0-0-0-0-0-0-0-0-0-0-0-0-0-0-0-1-0-0-0-0-0-0-0-0			19.5	0	0
TDP063	PTDNYEPS	0-0-0-0-1-0-0-0-0-0-0-0-0-0-0-0-0-0-0-0-0-0-0-0-0-0-0-0-0-0-0-0-0-0-0-0-0-0-0-0-0-0-0-0-0-0-0-0-0-0-0-0			19.7	0	0						PTDNYEPS
--------
TDP063	SKLGQRPTD^nyeps	1-0-1-0-1-0-1-0-1-0-0-0-0-1-1-1-1-0-0-0-0-0-0-0-0-0-0-0-0-0-1-0-1-1-0-1-0-1-0-0-1-0-0-1-0-0-1-1-0-0-1-1	1 times in 3 NECs		23.6	16.3	0
TDP063	SKLGQRPTDNYEPS	1-1-1-1-1-1-1-1-1-1-1-1-1-1-1-1-1-1-1-1-1-1-1-1-1-1-1-1-1-1-1-1-1-1-1-1-1-1-1-1-1-1-1-1-1-1-1-1-1-1-1-1	3 times in 3 NECs		31.6	29.8	0
TDP063	SKLGQRPTDNY^eps	0-0-0-0-0-0-0-0-0-0-0-0-0-0-0-0-0-0-0-0-0-0-0-0-0-0-0-0-0-0-0-0-0-0-0-0-0-0-0-0-0-0-0-1-0-0-1-1-0-0-0-0			28.3	0	0
TDP063	sk^LGQRPTDNYEPS	0-0-0-0-0-0-0-0-0-0-0-0-0-0-0-0-0-0-0-0-0-0-0-0-0-0-0-0-0-0-0-0-0-0-0-0-0-0-0-0-0-0-0-0-0-0-1-1-1-0-1-1			24.7	0	0
TDP063	sklgq^RPTDNYEPS	0-0-0-0-0-0-0-0-0-0-0-0-0-0-0-0-0-0-0-0-0-0-0-0-0-0-0-0-0-0-0-0-0-0-0-0-0-0-0-0-0-0-0-1-0-0-1-1-0-0-0-0			19.2	0	0
TDP063	SKLGQRPT^dnyeps	0-0-0-0-0-0-0-0-0-0-0-0-0-0-0-0-0-0-0-0-0-0-0-0-0-0-0-0-0-0-0-0-0-0-0-0-0-0-0-0-0-0-0-1-0-0-0-0-0-0-0-0			19.5	0	0
TDP063	s^KLGQRPTDNYEPS	0-0-0-0-0-0-0-0-0-0-0-0-0-0-0-0-0-0-0-0-0-0-0-0-0-0-0-0-0-0-0-0-0-0-0-0-0-0-0-0-0-0-0-0-0-0-1-0-0-1-0-0			20.2	0	0
TDP063	sk^LGQRPTDNY^eps	0-0-0-0-0-0-0-0-0-0-0-0-0-0-0-0-0-0-0-0-0-0-0-0-0-0-0-0-0-0-0-0-0-0-0-0-0-0-0-0-0-0-0-1-0-0-0-1-0-0-0-0			21	0	0
TDP063	SKLGQRP^tdnyeps	0-0-0-0-0-0-0-0-0-0-0-0-0-0-0-0-0-0-0-0-0-0-0-0-0-0-0-0-0-0-0-0-0-0-0-0-0-0-0-0-0-0-0-1-0-0-0-1-0-0-0-1			19.3	0	0
TDP063	SKLGQRPTDN^yeps	0-0-0-0-1-0-0-0-0-0-0-0-0-0-0-0-0-0-0-0-0-0-0-0-0-0-0-0-0-0-0-0-0-0-0-0-0-0-0-0-0-0-0-0-0-0-0-0-0-0-0-0			19.7	0	0
TDP063	sk^LGQRPTD^nyeps	0-0-0-0-0-0-0-0-0-0-0-0-0-0-0-0-0-0-0-0-0-0-0-0-0-0-0-0-0-0-0-0-0-0-0-0-0-0-0-0-0-0-0-1-0-0-0-1-0-0-0-1			18.9	0	0
TDP064	PKAPESXX	0-0-0-0-0-0-0-0-0-0-0-0-0-0-0-0-0-0-0-0-0-0-0-0-0-0-0-0-0-0-0-0-0-0-0-0-0-0-0-0-0-0-2-1-0-0-1-1-0-1-1-2			24.2	0	0
TDP064	KAPESXXX	0-0-0-0-0-0-0-0-0-0-0-1-1-1-0-0-0-0-0-0-0-0-0-0-0-0-0-0-0-0-0-0-0-0-0-0-0-0-0-0-0-0-0-0-0-0-0-0-0-0-0-0			22.6	0	0													KAPESXXX	KAPESXXX	KAPESXXX
TDP064	RRVYLTSP	0-0-0-0-0-0-0-0-0-0-0-1-1-1-0-0-0-1-0-0-0-0-0-0-0-0-0-0-0-0-0-0-0-0-0-0-0-0-0-1-1-1-2-2-1-0-1-2-1-1-1-2			25	0	0													RRVYLTSP	RRVYLTSP	RRVYLTSP				RRVYLTSP																						RRVYLTSP	RRVYLTSP
TDP064	XXXHRRVY	0-0-0-0-0-0-0-0-0-0-0-0-0-0-0-0-1-0-0-0-0-0-0-0-0-0-0-0-0-0-0-0-0-0-0-0-0-0-0-0-0-0-0-0-0-0-1-0-0-0-0-0			16	0	0																		XXXHRRVY
TDP064	XXHRRVYL	1-1-0-1-0-1-1-0-1-0-0-1-1-0-0-1-1-0-1-0-0-0-0-0-0-0-1-0-0-0-0-1-1-0-0-0-0-1-0-1-1-1-1-0-1-1-1-0-1-1-0-0	2 times in 3 NECs		29.1	17.8	0		XXHRRVYL	XXHRRVYL		XXHRRVYL		XXHRRVYL	XXHRRVYL		XXHRRVYL			XXHRRVYL	XXHRRVYL			XXHRRVYL	XXHRRVYL		XXHRRVYL								XXHRRVYL					XXHRRVYL	XXHRRVYL					XXHRRVYL		XXHRRVYL	XXHRRVYL
TDP064	RVYLTSPK	0-0-0-0-0-0-0-0-0-0-0-0-0-0-0-0-0-0-0-0-0-0-0-0-0-0-0-0-0-0-0-0-0-0-0-0-0-0-0-0-0-0-0-1-0-0-0-1-0-0-1-1			20.3	0	0
TDP064	XHRRVYLT	0-0-0-0-0-0-0-0-0-0-0-0-0-0-0-0-0-0-0-0-0-0-0-0-0-0-0-0-0-0-0-0-0-0-0-0-0-0-0-0-1-2-3-2-1-1-1-2-1-2-3-3			30.9	0	0																																										XHRRVYLT
TDP064	TSPKAPES	0-0-0-0-0-0-0-0-0-0-0-0-0-0-0-0-0-0-0-0-0-0-0-0-0-0-0-0-0-0-0-0-0-0-0-0-0-0-0-0-0-1-1-1-0-0-0-1-0-0-1-1			19.6	0	0
TDP064	HRRVYLTS	0-0-0-0-0-0-0-0-0-0-0-0-0-0-0-0-0-0-0-0-0-0-0-0-0-0-0-0-0-0-0-0-0-0-0-0-0-0-0-0-0-0-0-1-0-0-0-0-0-0-0-0			21	0	0
--------
TDP064	hrr^VYLTSPKAPES	0-0-0-0-0-0-0-0-0-0-0-0-0-0-0-0-0-0-0-0-0-0-0-0-0-0-0-0-0-0-0-0-0-0-0-0-0-0-0-0-1-1-1-1-1-1-1-1-1-1-1-1			30.9	0	0
TDP064	hrrv^YLTSPKAPES	0-0-0-0-0-0-0-0-0-0-0-0-0-0-0-0-0-0-0-0-0-0-0-0-0-0-0-0-0-0-0-0-0-0-0-0-0-0-0-0-0-0-0-1-0-0-0-0-0-0-0-0			21	0	0
TDP064	hr^RVYLTSPKAPES	1-1-0-1-0-1-1-0-1-0-0-1-1-0-0-1-1-0-1-0-0-0-0-0-0-0-1-0-0-0-0-1-1-0-0-0-0-1-0-1-1-1-1-0-1-1-1-0-1-1-0-0	2 times in 3 NECs		29.1	17.8	0
TDP064	hrr^VYLTSPKAP^es	0-0-0-0-0-0-0-0-0-0-0-0-0-0-0-0-0-0-0-0-0-0-0-0-0-0-0-0-0-0-0-0-0-0-0-0-0-0-0-0-0-0-1-0-0-0-0-0-0-1-1-1			24.2	0	0
TDP064	HRRVYLTSPKAPES	1-1-1-1-1-1-1-1-1-1-1-1-1-1-1-1-1-1-1-1-1-1-1-1-1-1-1-1-1-1-1-1-1-1-1-1-1-1-1-1-1-1-0-0-1-1-1-0-1-1-1-0	3 times in 3 NECs		26.1	21.5	0
TDP064	hrrvyl^TSPKAPES	0-0-0-0-0-0-0-0-0-0-0-0-0-0-0-0-0-0-0-0-0-0-0-0-0-0-0-0-0-0-0-0-0-0-0-0-0-0-0-0-0-0-0-1-0-0-0-1-0-0-1-1			20.3	0	0
TDP064	hrrvy^LTSPKAPES	0-0-0-0-0-0-0-0-0-0-0-1-1-1-0-0-0-1-0-0-0-0-0-0-0-0-0-0-0-0-0-0-0-0-0-0-0-0-0-1-1-1-1-1-1-0-1-1-1-1-1-1			25	0	0
TDP064	hrr^VYLTSPK^apes	0-0-0-0-0-0-0-0-0-0-0-0-0-0-0-0-0-0-0-0-0-0-0-0-0-0-0-0-0-0-0-0-0-0-0-0-0-0-0-0-0-1-1-1-0-0-0-1-0-0-1-1			19.6	0	0
TDP064	HRRVYLTSPKAPE^s	0-0-0-0-0-0-0-0-0-0-0-1-1-1-0-0-0-0-0-0-0-0-0-0-0-0-0-0-0-0-0-0-0-0-0-0-0-0-0-0-0-0-0-0-0-0-0-0-0-0-0-0			22.6	0	0
TDP064	h^RRVYLTSPKAPES	0-0-0-0-0-0-0-0-0-0-0-0-0-0-0-0-1-0-0-0-0-0-0-0-0-0-0-0-0-0-0-0-0-0-0-0-0-0-0-0-0-0-0-0-0-0-1-0-0-0-0-0			16	0	0
TDP064	hrrvy^LTSPKAP^es	0-0-0-0-0-0-0-0-0-0-0-0-0-0-0-0-0-0-0-0-0-0-0-0-0-0-0-0-0-0-0-0-0-0-0-0-0-0-0-0-0-0-1-1-0-0-0-1-0-0-0-1			19.4	0	0
TDP064	HRRVYLTSPKAP^es	0-0-0-0-0-0-0-0-0-0-0-0-0-0-0-0-0-0-0-0-0-0-0-0-0-0-0-0-0-0-0-0-0-0-0-0-0-0-0-0-0-0-0-0-0-0-1-0-0-0-0-0			17.7	0	0
TDP065	WKPHDVMG	0-0-0-0-0-0-0-0-0-0-0-0-0-0-0-0-0-0-0-0-0-0-0-0-0-0-0-0-0-0-0-0-0-0-0-0-0-0-0-0-1-1-2-1-1-1-1-2-1-1-3-3			19.9	0	0																																										WKPHDVMG
TDP065	MGSRGLYT	0-0-0-0-0-0-0-0-0-0-0-0-0-0-0-0-0-0-0-0-0-0-0-0-0-0-0-0-0-0-0-0-0-0-0-0-0-0-0-0-1-1-3-3-1-1-2-3-1-1-2-2			40.8	0	0																																										MGSRGLYT
TDP065	SRGLYTXX	0-0-0-1-1-0-0-0-0-1-0-1-1-1-0-0-0-0-0-0-0-0-0-0-0-0-0-0-0-0-0-0-0-0-1-0-0-1-1-1-1-2-3-0-1-1-3-3-1-2-2-2			32.5	0	0					SRGLYTXX	SRGLYTXX					SRGLYTXX		SRGLYTXX	SRGLYTXX	SRGLYTXX																					SRGLYTXX			SRGLYTXX	SRGLYTXX	SRGLYTXX	SRGLYTXX
TDP065	RGLYTXXX	0-0-0-0-0-0-0-0-0-0-0-0-0-1-0-0-0-0-0-0-0-0-0-0-0-0-0-0-0-0-0-0-0-0-0-0-0-0-0-0-0-0-0-0-0-0-0-0-0-0-1-0			27.8	0	0															RGLYTXXX
TDP065	XWKPHDVM	0-0-0-0-0-0-0-0-0-0-0-0-0-0-0-0-0-0-0-0-1-0-0-0-0-0-0-0-0-1-0-0-0-0-0-0-0-0-0-0-1-1-2-1-1-1-2-4-1-2-2-1			28.1	0	0																						XWKPHDVM									XWKPHDVM											XWKPHDVM
TDP065	GSRGLYTX	0-0-0-0-0-0-0-0-0-0-0-0-0-1-0-0-0-0-0-0-0-0-0-0-0-0-0-0-0-0-0-0-0-0-0-0-0-0-0-1-1-1-1-0-1-1-1-2-1-1-1-0			30.7	0	0															GSRGLYTX																										GSRGLYTX	GSRGLYTX
TDP065	XXXWKPHD	0-0-0-0-0-0-0-0-0-0-0-0-0-0-0-0-0-0-1-1-1-1-1-1-1-1-0-0-0-0-0-0-0-0-0-0-0-0-0-0-0-2-2-1-0-1-3-3-0-1-0-0			30.6	0	0																				XXXWKPHD	XXXWKPHD	XXXWKPHD	XXXWKPHD	XXXWKPHD	XXXWKPHD	XXXWKPHD	XXXWKPHD
TDP065	VMGSRGLY	0-0-0-0-0-0-0-0-0-0-0-0-0-0-0-0-0-0-0-0-0-0-0-0-0-0-0-0-0-0-0-0-0-0-0-0-0-0-0-0-0-0-0-0-0-0-0-1-0-0-1-0			15.1	0	0
TDP065	KPHDVMGS	0-1-1-1-1-1-1-0-0-0-1-1-1-0-1-1-1-1-0-0-0-0-0-0-0-0-0-0-0-0-0-0-1-0-0-0-0-1-1-1-1-1-1-0-0-0-1-1-1-1-1-0	2 times in 3 NECs		20.9	16.1	0			KPHDVMGS	KPHDVMGS	KPHDVMGS	KPHDVMGS	KPHDVMGS	KPHDVMGS				KPHDVMGS	KPHDVMGS	KPHDVMGS		KPHDVMGS	KPHDVMGS	KPHDVMGS	KPHDVMGS															KPHDVMGS					KPHDVMGS	KPHDVMGS	KPHDVMGS	KPHDVMGS
TDP065	DVMGSRGL	0-0-0-0-0-0-0-0-0-0-0-0-0-0-0-0-0-0-0-0-0-0-0-0-0-0-0-0-0-0-0-0-0-0-0-0-0-0-0-0-0-0-0-0-0-0-1-0-0-0-0-1			16.8	0	0
--------
TDP065	WKPHDVMGSR^glyt	0-0-0-0-0-0-0-0-0-0-0-0-0-0-0-0-0-0-0-0-0-0-0-0-0-0-0-0-0-0-0-0-0-0-0-0-0-0-0-0-1-1-1-0-1-1-1-0-1-1-1-0			40.8	0	0
TDP065	wkp^HDVMGSR^glyt	0-0-0-0-0-0-0-0-0-0-0-0-0-0-0-0-0-0-0-0-0-0-0-0-0-0-0-0-0-0-0-0-0-0-0-0-0-0-0-0-0-0-0-1-0-0-0-1-0-0-0-1			24.3	0	0
TDP065	w^KPHDVMGSR^glyt	0-0-0-0-0-0-0-0-0-0-0-0-0-0-0-0-0-0-0-0-0-0-0-0-0-0-0-0-0-0-0-0-0-0-0-0-0-0-0-0-0-0-1-1-0-0-1-1-0-0-0-0			30.6	0	0
TDP065	wkp^HDVMGSRGLYT	0-0-0-0-0-0-0-0-0-0-0-0-0-0-0-0-0-0-0-0-1-0-0-0-0-0-0-0-0-1-0-0-0-0-0-0-0-0-0-0-1-1-1-0-1-1-1-1-1-1-1-0			28.1	0	0
TDP065	WKPHDVMGSRGL^yt	0-0-0-1-1-0-0-0-0-1-0-1-1-1-0-0-0-0-0-0-0-0-0-0-0-0-0-0-0-0-0-0-0-0-1-0-0-1-1-1-1-1-1-0-1-1-1-1-1-1-1-1			32.5	0	0
TDP065	WKPHDVMGSRGLYT	1-1-1-1-0-1-1-1-1-1-1-1-1-1-1-1-1-1-1-1-1-0-0-0-0-0-0-1-0-0-1-1-1-1-1-1-1-1-1-1-1-0-0-1-1-1-1-0-1-1-0-0	3 times in 3 NECs		29.9	29.1	0
TDP065	WKPHDVMGSRG^lyt	0-0-0-0-0-0-0-0-0-0-0-0-0-1-0-0-0-0-0-0-0-0-0-0-0-0-0-0-0-0-0-0-0-0-0-0-0-0-0-1-1-1-1-0-1-1-1-1-1-1-1-0			30.7	0	0
TDP065	w^KPHDVMGSRGLYT	0-0-0-0-0-0-0-0-0-0-0-0-0-0-0-0-0-0-1-1-1-1-1-1-1-1-0-0-0-0-0-0-0-0-0-0-0-0-0-0-0-1-0-0-0-1-1-0-0-1-0-0			25.2	0	0
TDP065	w^KPHDVMGSRGL^yt	0-0-0-0-0-0-0-0-0-0-0-0-0-0-0-0-0-0-0-0-0-0-0-0-0-0-0-0-0-0-0-0-0-0-0-0-0-0-0-0-0-1-1-0-0-0-1-1-0-0-0-0			21.9	0	0
TDP065	WKPHDVMGSRGLY^t	0-0-0-0-0-0-0-0-0-0-0-0-0-1-0-0-0-0-0-0-0-0-0-0-0-0-0-0-0-0-0-0-0-0-0-0-0-0-0-0-0-0-0-0-0-0-0-0-0-0-0-0			27.8	0	0
TDP065	wkp^HDVMGSRGL^yt	0-0-0-0-0-0-0-0-0-0-0-0-0-0-0-0-0-0-0-0-0-0-0-0-0-0-0-0-0-0-0-0-0-0-0-0-0-0-0-0-0-0-1-0-0-0-1-1-0-1-1-0			20.4	0	0
TDP065	wkphd^VMGSRGLYT	0-1-1-1-1-1-1-0-0-0-1-1-1-0-1-1-1-1-0-0-0-0-0-0-0-0-0-0-0-0-0-0-1-0-0-0-0-1-1-1-1-1-1-0-0-0-1-1-1-1-1-0	2 times in 3 NECs		20.9	16.1	0
TDP065	wkph^DVMGSRGLYT	0-0-0-0-0-0-0-0-0-0-0-0-0-0-0-0-0-0-0-0-0-0-0-0-0-0-0-0-0-0-0-0-0-0-0-0-0-0-0-0-1-1-1-0-1-1-1-1-1-1-1-1			19.9	0	0
TDP065	w^KPHDVMGS^rglyt	0-0-0-0-0-0-0-0-0-0-0-0-0-0-0-0-0-0-0-0-0-0-0-0-0-0-0-0-0-0-0-0-0-0-0-0-0-0-0-0-0-0-0-0-0-0-0-1-0-0-0-0			15.1	0	0
TDP065	wkph^DVMGSRGLY^t	0-0-0-0-0-0-0-0-0-0-0-0-0-0-0-0-0-0-0-0-0-0-0-0-0-0-0-0-0-0-0-0-0-0-0-0-0-0-0-0-0-0-0-0-0-0-0-0-0-0-1-0			17.3	0	0
TDP065	wkph^DVMGSR^glyt	0-0-0-0-0-0-0-0-0-0-0-0-0-0-0-0-0-0-0-0-0-0-0-0-0-0-0-0-0-0-0-0-0-0-0-0-0-0-0-0-0-0-1-1-0-0-0-1-0-0-1-1			16.3	0	0
TDP065	wkp^HDVMGSRG^lyt	0-0-0-0-0-0-0-0-0-0-0-0-0-0-0-0-0-0-0-0-0-0-0-0-0-0-0-0-0-0-0-0-0-0-0-0-0-0-0-0-0-0-0-0-0-0-0-1-0-0-0-0			16.1	0	0
TDP065	wkph^DVMGSRGL^yt	0-0-0-0-0-0-0-0-0-0-0-0-0-0-0-0-0-0-0-0-0-0-0-0-0-0-0-0-0-0-0-0-0-0-0-0-0-0-0-0-0-0-0-0-0-0-0-0-0-0-0-1			16.1	0	0
TDP065	WKPHDVMG^srglyt	0-0-0-0-0-0-0-0-0-0-0-0-0-0-0-0-0-0-0-0-0-0-0-0-0-0-0-0-0-0-0-0-0-0-0-0-0-0-0-0-0-0-0-0-0-0-1-0-0-0-0-1			16.8	0	0
TDP065	WKPHDVMGS^rglyt	0-0-0-0-0-0-0-0-0-0-0-0-0-0-0-0-0-0-0-0-0-0-0-0-0-0-0-0-0-0-0-0-0-0-0-0-0-0-0-0-0-0-0-0-0-0-0-0-0-0-1-0			15	0	0
TDP066	XXPKDRWH	0-0-0-0-0-0-0-1-0-0-0-0-0-0-0-0-0-0-0-0-0-0-0-0-0-0-0-0-0-0-0-0-0-0-0-0-0-0-0-0-0-0-0-0-0-0-0-0-0-0-0-0			15.7	0	0									XXPKDRWH
TDP066	KDRWHTWM	0-0-0-0-0-0-0-0-0-0-0-0-0-0-0-0-0-0-0-0-0-0-0-0-0-0-0-0-0-0-0-0-0-0-0-0-0-0-0-0-1-1-0-0-0-1-1-0-1-1-0-0			21.1	0	0																																										KDRWHTWM
TDP066	MKIFNTXX	0-0-0-0-0-0-0-0-0-0-0-0-0-0-0-0-0-0-0-0-0-0-0-0-0-0-0-0-0-0-0-0-0-0-0-0-0-0-0-0-1-1-0-0-1-2-1-0-2-1-0-0			23.6	0	0																																										MKIFNTXX
TDP066	WHTWMKIF	0-0-0-1-1-0-0-0-0-0-0-0-0-0-0-0-0-0-0-0-0-0-0-0-0-0-0-0-0-0-0-0-0-0-0-0-0-0-0-0-0-0-0-0-0-0-1-0-0-0-0-0			23	0	0					WHTWMKIF	WHTWMKIF
TDP066	HTWMKIFN	0-0-0-0-0-0-0-0-0-0-0-0-0-0-0-0-0-0-0-0-0-0-0-0-0-0-0-0-0-0-0-0-0-0-0-0-0-0-0-0-1-0-0-0-0-0-0-0-0-1-0-0			30.5	0	0																																										HTWMKIFN
TDP066	TWMKIFNT	0-0-0-0-0-0-0-0-0-0-0-0-0-0-0-0-0-0-0-0-0-0-0-0-0-0-0-0-0-0-0-0-0-0-0-0-0-0-0-0-1-0-0-0-0-1-0-0-0-0-0-0			24.9	0	0																																										TWMKIFNT
TDP066	KIFNTXXX	0-0-0-0-0-0-0-0-0-0-0-1-1-0-0-0-0-0-0-0-0-0-0-0-0-0-0-0-0-0-0-0-0-0-0-0-0-0-0-0-0-0-0-0-0-0-0-0-0-0-0-0			27.8	0	0													KIFNTXXX	KIFNTXXX
--------
TDP066	PKDRWHTWMKIFN^t	0-0-0-0-0-0-0-0-0-0-0-1-1-0-0-0-0-0-0-0-0-0-0-0-0-0-0-0-0-0-0-0-0-0-0-0-0-0-0-0-0-0-0-0-0-0-0-0-0-0-0-0			27.8	0	0
TDP066	PKDRWHTWM^kifnt	0-0-0-0-0-0-0-0-0-0-0-0-0-0-0-0-0-0-0-0-0-0-0-0-0-0-0-0-0-0-0-0-0-0-0-0-0-0-0-0-1-0-0-0-0-0-0-0-0-1-0-0			30.5	0	0
TDP066	pkdrw^HTWMKIF^nt	0-0-0-0-0-0-0-0-0-0-0-0-0-0-0-0-0-0-0-0-0-0-0-0-0-0-0-0-0-0-0-0-0-0-0-0-0-0-0-0-1-1-0-0-0-1-1-0-1-1-0-0			21.1	0	0
TDP066	PKDRWHTWMKIF^nt	0-0-0-0-0-0-0-0-0-0-0-0-0-0-0-0-0-0-0-0-0-0-0-0-0-0-0-0-0-0-0-0-0-0-0-0-0-0-0-0-0-0-0-0-1-1-0-0-1-0-0-0			23.6	0	0
TDP066	PKDRWHTWMKIFNT	0-1-1-0-0-0-1-1-1-0-1-1-0-0-0-0-0-0-0-1-0-0-0-0-0-0-0-0-0-0-0-1-0-0-1-1-1-0-0-1-0-0-0-0-1-0-0-0-0-1-0-0	3 times in 3 NECs		24.2	22	0
TDP066	PKDRWHTW^mkifnt	0-0-0-1-1-0-0-0-0-0-0-0-0-0-0-0-0-0-0-0-0-0-0-0-0-0-0-0-0-0-0-0-0-0-0-0-0-0-0-0-0-0-0-0-0-0-1-0-0-0-0-0			23	0	0
TDP066	PKDRWHTWMK^ifnt	0-0-0-0-0-0-0-0-0-0-0-0-0-0-0-0-0-0-0-0-0-0-0-0-0-0-0-0-0-0-0-0-0-0-0-0-0-0-0-0-1-0-0-0-0-1-0-0-0-0-0-0			24.9	0	0
TDP066	pk^DRWHTWMKIFNT	0-0-0-0-0-0-0-1-0-0-0-0-0-0-0-0-0-0-0-0-0-0-0-0-0-0-0-0-0-0-0-0-0-0-0-0-0-0-0-0-0-0-0-0-0-0-0-0-0-0-0-0			15.7	0	0
TDP067	XLFNDVNI	0-0-0-0-0-0-0-0-0-0-0-0-0-0-0-0-0-0-0-0-0-0-0-0-0-0-0-0-0-0-0-0-0-0-0-0-0-0-0-0-0-1-2-1-0-0-1-1-0-1-2-2			22.3	0	0
TDP067	FEIHGVDX	0-0-0-0-0-0-0-1-0-0-0-0-0-0-0-0-0-0-0-0-0-0-0-0-0-0-0-0-0-0-0-0-0-0-0-0-0-0-0-0-1-1-3-5-1-1-1-2-0-1-4-3			38.4	0	0									FEIHGVDX																																	FEIHGVDX
TDP067	XXXLFNDV	0-0-0-0-0-0-0-0-0-0-0-0-0-0-0-0-0-0-0-0-0-0-0-0-0-0-0-0-0-0-0-0-0-0-0-0-0-0-0-0-0-0-0-1-0-0-0-0-0-0-0-0			20.8	0	0
TDP067	NDVNIFEI	0-0-0-0-0-0-0-0-1-1-0-0-0-0-0-0-0-1-0-0-0-0-0-0-0-0-0-0-0-0-0-0-0-0-0-0-0-0-0-0-0-0-0-0-0-0-0-1-0-0-1-1			17.3	0	0										NDVNIFEI	NDVNIFEI								NDVNIFEI
TDP067	VNIFEIHG	0-0-0-0-0-0-0-0-0-0-0-0-0-0-0-0-0-0-0-0-0-0-0-0-0-0-0-0-0-0-0-0-0-0-0-0-0-0-0-0-0-0-0-0-0-0-1-0-0-0-0-0			15.9	0	0
TDP067	EIHGVDXX	0-0-0-0-0-0-0-0-0-0-0-0-0-0-0-0-0-0-0-0-0-0-0-0-0-0-0-0-0-0-0-0-0-0-0-0-0-0-0-0-0-0-0-0-0-0-1-0-0-0-0-0			18.8	0	0
TDP067	XXLFNDVN	0-0-0-0-0-0-0-0-0-0-0-0-0-0-0-0-0-0-0-0-0-0-0-0-0-0-0-0-0-0-0-0-0-0-0-0-0-0-0-0-0-1-1-1-0-0-1-1-0-1-2-1			29.9	0	0
TDP067	LFNDVNIF	0-0-0-0-0-0-0-0-0-0-0-0-0-0-0-0-0-0-0-0-0-0-0-0-0-0-0-0-0-0-0-0-0-0-0-0-0-0-0-0-0-0-2-1-0-0-1-1-0-0-2-1			24.2	0	0
--------
TDP067	LFNDVNIFEIHGVD	1-1-1-1-1-1-1-1-1-1-1-1-1-1-1-1-1-1-1-1-1-1-1-1-1-1-1-1-1-1-1-1-1-1-1-1-1-1-1-1-1-1-1-0-1-1-1-1-1-1-1-0	3 times in 3 NECs		35.8	33.7	0
TDP067	LFNDVNIFEIH^gvd	0-0-0-0-0-0-0-1-0-0-0-0-0-0-0-0-0-0-0-0-0-0-0-0-0-0-0-0-0-0-0-0-0-0-0-0-0-0-0-0-1-1-0-1-1-1-1-1-0-1-1-1			38.4	0	0
TDP067	lf^NDVNIFEIH^gvd	0-0-0-0-0-0-0-0-0-0-0-0-0-0-0-0-0-0-0-0-0-0-0-0-0-0-0-0-0-0-0-0-0-0-0-0-0-0-0-0-0-0-1-1-0-0-0-1-0-0-1-0			29.9	0	0
TDP067	l^FNDVNIFEIH^gvd	0-0-0-0-0-0-0-0-0-0-0-0-0-0-0-0-0-0-0-0-0-0-0-0-0-0-0-0-0-0-0-0-0-0-0-0-0-0-0-0-0-0-0-1-0-0-0-0-0-0-0-0			20.8	0	0
TDP067	lfn^DVNIFEIH^gvd	0-0-0-0-0-0-0-0-0-0-0-0-0-0-0-0-0-0-0-0-0-0-0-0-0-0-0-0-0-0-0-0-0-0-0-0-0-0-0-0-0-0-1-1-0-0-0-0-0-0-1-1			21.3	0	0
TDP067	lfnd^VNIFEIH^gvd	0-0-0-0-0-0-0-0-0-0-0-0-0-0-0-0-0-0-0-0-0-0-0-0-0-0-0-0-0-0-0-0-0-0-0-0-0-0-0-0-0-0-1-1-0-0-0-0-0-0-1-1			24.2	0	0
TDP067	LFNDVNIFEIHG^vd	0-0-0-0-0-0-0-0-0-0-0-0-0-0-0-0-0-0-0-0-0-0-0-0-0-0-0-0-0-0-0-0-0-0-0-0-0-0-0-0-0-0-0-0-0-0-1-0-0-0-0-0			18.8	0	0
TDP067	lfn^DVNIFEIHGVD	0-0-0-0-0-0-0-0-0-0-0-0-0-0-0-0-0-0-0-0-0-0-0-0-0-0-0-0-0-0-0-0-0-0-0-0-0-0-0-0-0-1-1-0-0-0-1-1-0-1-1-1			22.3	0	0
TDP067	lfnd^VNIFEIHGVD	0-0-0-0-0-0-0-0-0-0-0-0-0-0-0-0-0-0-0-0-0-0-0-0-0-0-0-0-0-0-0-0-0-0-0-0-0-0-0-0-0-0-1-0-0-0-1-1-0-0-1-0			20.1	0	0
TDP067	lf^NDVNIFEIHGVD	0-0-0-0-0-0-0-0-0-0-0-0-0-0-0-0-0-0-0-0-0-0-0-0-0-0-0-0-0-0-0-0-0-0-0-0-0-0-0-0-0-1-0-0-0-0-1-0-0-1-1-1			21.1	0	0
TDP067	LFNDVNIF^eihgvd	0-0-0-0-0-0-0-0-0-0-0-0-0-0-0-0-0-0-0-0-0-0-0-0-0-0-0-0-0-0-0-0-0-0-0-0-0-0-0-0-0-0-0-0-0-0-1-0-0-0-0-0			15.9	0	0
TDP067	lfndvn^IFEIHGVD	0-0-0-0-0-0-0-0-1-1-0-0-0-0-0-0-0-1-0-0-0-0-0-0-0-0-0-0-0-0-0-0-0-0-0-0-0-0-0-0-0-0-0-0-0-0-0-1-0-0-1-1			17.3	0	0
TDP068	FIEPDVSQ	0-0-0-0-0-0-0-0-0-0-0-0-0-0-0-0-0-0-0-0-0-0-0-0-0-0-0-0-0-0-0-0-0-0-0-0-0-0-0-0-0-0-0-0-0-0-1-1-0-0-0-0			16.8	0	0
TDP068	XSFIEPDV	0-0-0-0-0-0-0-0-0-0-0-0-0-0-0-0-0-0-0-0-1-0-0-0-0-0-0-0-0-0-0-0-0-0-0-0-0-0-0-0-0-0-0-0-0-0-0-0-0-0-0-0			15.2	0	0																						XSFIEPDV
TDP068	XXXSFIEP	0-1-0-1-1-1-0-1-1-0-0-1-1-1-1-0-1-0-0-1-0-1-0-1-0-0-0-1-1-1-1-0-1-1-1-1-1-1-0-0-1-1-1-3-1-1-1-1-1-1-0-2	3 times in 3 NECs		32.7	28.3	0			XXXSFIEP		XXXSFIEP	XXXSFIEP	XXXSFIEP		XXXSFIEP	XXXSFIEP			XXXSFIEP	XXXSFIEP	XXXSFIEP	XXXSFIEP		XXXSFIEP			XXXSFIEP		XXXSFIEP		XXXSFIEP				XXXSFIEP	XXXSFIEP	XXXSFIEP	XXXSFIEP		XXXSFIEP	XXXSFIEP	XXXSFIEP	XXXSFIEP	XXXSFIEP	XXXSFIEP			XXXSFIEP
TDP068	SQVKHMEX	0-0-0-0-0-0-0-0-0-0-0-0-0-0-0-0-0-0-0-0-0-0-0-0-0-0-0-0-1-0-0-0-0-0-0-0-0-0-0-0-0-1-1-3-0-1-1-2-0-1-1-3			36.1	0	0																														SQVKHMEX
TDP068	QVKHMEXX	1-1-1-1-1-1-1-1-1-1-1-1-1-1-0-1-1-1-1-1-1-1-1-1-1-0-0-0-0-0-1-1-1-1-0-1-1-1-1-1-1-1-1-3-1-0-1-1-1-0-1-2	3 times in 3 NECs		39.9	26.9	0		QVKHMEXX	QVKHMEXX	QVKHMEXX	QVKHMEXX	QVKHMEXX	QVKHMEXX	QVKHMEXX	QVKHMEXX	QVKHMEXX	QVKHMEXX	QVKHMEXX	QVKHMEXX	QVKHMEXX	QVKHMEXX		QVKHMEXX	QVKHMEXX	QVKHMEXX	QVKHMEXX	QVKHMEXX	QVKHMEXX	QVKHMEXX	QVKHMEXX	QVKHMEXX	QVKHMEXX						QVKHMEXX	QVKHMEXX	QVKHMEXX	QVKHMEXX		QVKHMEXX	QVKHMEXX	QVKHMEXX	QVKHMEXX	QVKHMEXX	QVKHMEXX
TDP068	XXSFIEPD	1-1-0-1-1-1-0-1-0-1-0-1-1-0-1-1-1-0-1-0-1-1-0-0-1-0-1-0-1-1-0-0-1-1-0-0-1-1-1-1-1-1-0-3-1-0-1-1-0-0-1-2	1 times in 3 NECs		30.7	16.7	0		XXSFIEPD	XXSFIEPD		XXSFIEPD	XXSFIEPD	XXSFIEPD		XXSFIEPD		XXSFIEPD		XXSFIEPD	XXSFIEPD		XXSFIEPD	XXSFIEPD	XXSFIEPD		XXSFIEPD		XXSFIEPD	XXSFIEPD			XXSFIEPD		XXSFIEPD		XXSFIEPD	XXSFIEPD			XXSFIEPD	XXSFIEPD			XXSFIEPD	XXSFIEPD	XXSFIEPD	XXSFIEPD	XXSFIEPD
TDP068	SFIEPDVS	0-1-0-0-0-1-0-0-0-0-1-0-0-0-0-1-1-0-0-0-0-0-0-0-0-0-0-0-0-0-0-0-1-0-0-0-0-0-0-0-0-0-0-0-0-0-0-0-0-0-0-0			18.2	0	0			SFIEPDVS				SFIEPDVS					SFIEPDVS					SFIEPDVS	SFIEPDVS																SFIEPDVS
TDP068	VSQVKHME	0-0-0-0-0-0-0-0-0-0-0-0-0-0-0-0-0-0-0-0-0-0-0-0-0-0-0-0-0-0-0-0-0-0-0-0-0-0-0-0-0-0-0-1-0-1-1-0-0-0-1-1			19.8	0	0
TDP068	VKHMEXXX	0-0-1-0-0-1-0-1-1-1-1-0-1-0-1-1-1-1-0-0-0-0-0-0-0-0-0-0-0-0-1-1-0-1-1-1-0-0-1-1-1-0-1-1-0-1-1-1-1-1-1-1	3 times in 3 NECs		28.2	23	0				VKHMEXXX			VKHMEXXX		VKHMEXXX	VKHMEXXX	VKHMEXXX	VKHMEXXX		VKHMEXXX		VKHMEXXX	VKHMEXXX	VKHMEXXX	VKHMEXXX													VKHMEXXX	VKHMEXXX		VKHMEXXX	VKHMEXXX	VKHMEXXX			VKHMEXXX	VKHMEXXX	VKHMEXXX
TDP068	IEPDVSQV	1-1-0-0-1-0-1-1-0-0-1-1-0-0-0-0-1-0-0-0-0-0-0-0-0-0-0-0-0-0-0-0-1-1-1-0-1-1-1-1-0-0-0-1-0-0-1-1-0-0-1-1	2 times in 3 NECs		21	20.2	0		IEPDVSQV	IEPDVSQV			IEPDVSQV		IEPDVSQV	IEPDVSQV			IEPDVSQV	IEPDVSQV					IEPDVSQV																IEPDVSQV	IEPDVSQV	IEPDVSQV		IEPDVSQV	IEPDVSQV	IEPDVSQV	IEPDVSQV
--------
TDP068	SFIEPDVSQVKHME	1-1-1-1-1-1-1-1-1-1-1-1-1-1-1-1-1-1-1-1-1-1-1-1-1-1-1-1-1-1-1-1-1-1-1-1-1-1-1-1-1-1-1-1-1-1-1-1-1-1-1-1	3 times in 3 NECs		36.9	31.8	0
TDP068	SFIEPDVSQVKH^me	1-1-1-1-1-1-1-1-1-1-1-1-1-1-0-1-1-1-1-1-1-1-1-1-1-0-0-0-0-0-1-1-1-1-0-1-1-1-1-1-1-1-1-1-1-0-1-1-1-0-1-1	3 times in 3 NECs		39.9	26.9	0
TDP068	s^FIEPDVSQVKHME	0-1-0-1-1-1-0-1-1-0-0-1-1-1-1-0-1-0-0-1-0-1-0-1-0-0-0-1-1-1-1-0-1-1-1-1-1-1-0-0-1-1-1-1-1-1-1-0-1-1-0-1	3 times in 3 NECs		32.6	28.3	0
TDP068	SFIEPDVSQVKHM^e	0-0-1-0-0-1-0-1-1-1-1-0-1-0-1-1-1-1-0-0-0-0-0-0-0-0-0-0-0-0-1-1-0-1-1-1-0-0-1-1-1-0-1-1-0-1-1-1-1-1-1-1	3 times in 3 NECs		28.2	23	0
TDP068	SFIEPDVSQVK^hme	0-0-0-0-0-0-0-0-0-0-0-0-0-0-0-0-0-0-0-0-0-0-0-0-0-0-0-0-1-0-0-0-0-0-0-0-0-0-0-0-0-1-1-1-0-1-1-1-0-1-1-1			36.1	0	0
TDP068	s^FIEPDVSQVK^hme	0-0-0-0-0-0-0-0-0-0-0-0-0-0-0-0-0-0-0-0-0-0-0-0-0-0-0-0-0-0-0-0-0-0-0-0-0-0-0-0-0-0-0-1-0-0-0-1-0-0-0-1			27.4	0	0
TDP068	sf^IEPDVSQVKHME	1-1-0-1-1-1-0-1-0-1-0-1-1-0-1-1-1-0-1-0-1-1-0-0-1-0-1-0-1-1-0-0-1-1-0-0-1-1-1-1-1-1-0-1-1-0-1-1-0-0-1-0	1 times in 3 NECs		30.7	16.7	0
TDP068	s^FIEPDVSQVKH^me	0-0-0-0-0-0-0-0-0-0-0-0-0-0-0-0-0-0-0-0-0-0-0-0-0-0-0-0-0-0-0-0-0-0-0-0-0-0-0-0-0-0-0-1-0-0-0-0-0-0-0-0			32.7	0	0
TDP068	sf^IEPDVSQVKH^me	0-0-0-0-0-0-0-0-0-0-0-0-0-0-0-0-0-0-0-0-0-0-0-0-0-0-0-0-0-0-0-0-0-0-0-0-0-0-0-0-0-0-0-1-0-0-0-0-0-0-0-1			25.4	0	0
TDP068	sfiepd^VSQVKHME	1-1-0-0-1-0-1-1-0-0-1-1-0-0-0-0-1-0-0-0-0-0-0-0-0-0-0-0-0-0-0-0-1-1-1-0-1-1-1-1-0-0-0-1-0-0-1-1-0-0-1-1	2 times in 3 NECs		21	20.2	0
TDP068	SFIEPDVSQV^khme	0-0-0-0-0-0-0-0-0-0-0-0-0-0-0-0-0-0-0-0-0-0-0-0-0-0-0-0-0-0-0-0-0-0-0-0-0-0-0-0-0-0-0-1-0-1-1-0-0-0-1-1			19.8	0	0
TDP068	sfie^PDVSQVKHME	0-1-0-0-0-1-0-0-0-0-1-0-0-0-0-1-1-0-0-0-0-0-0-0-0-0-0-0-0-0-0-0-1-0-0-0-0-0-0-0-0-0-0-0-0-0-0-0-0-0-0-0			18.2	0	0
TDP068	sfiep^DVSQVKHME	0-0-0-0-0-0-0-0-0-0-0-0-0-0-0-0-0-0-0-0-0-0-0-0-0-0-0-0-0-0-0-0-0-0-0-0-0-0-0-0-0-0-0-0-0-0-1-1-0-0-0-0			16.8	0	0
TDP068	sf^IEPDVSQVK^hme	0-0-0-0-0-0-0-0-0-0-0-0-0-0-0-0-0-0-0-0-0-0-0-0-0-0-0-0-0-0-0-0-0-0-0-0-0-0-0-0-0-0-0-1-0-0-0-0-0-0-0-1			22.9	0	0
TDP068	sfi^EPDVSQVKHME	0-0-0-0-0-0-0-0-0-0-0-0-0-0-0-0-0-0-0-0-1-0-0-0-0-0-0-0-0-0-0-0-0-0-0-0-0-0-0-0-0-0-0-0-0-0-0-0-0-0-0-0			15.2	0	0
TDP069	ADSQESAR	0-0-0-0-0-0-0-0-0-0-0-0-0-0-0-0-0-0-0-0-0-0-0-0-0-0-0-0-0-0-0-0-0-0-0-0-0-0-0-0-0-0-0-0-0-0-1-1-0-0-1-0			19.2	0	0
TDP069	DSQESARD	0-0-0-0-0-0-0-0-0-0-0-0-0-0-0-0-0-0-0-0-0-0-0-0-0-0-0-0-0-0-0-0-0-0-0-0-0-0-0-0-0-0-0-0-0-0-1-0-0-0-1-0			20.3	0	0
TDP069	QESARDXX	0-0-0-0-0-0-0-0-0-1-0-0-0-0-0-0-0-0-0-0-0-0-0-0-0-0-0-0-0-0-0-0-0-0-0-0-0-0-0-0-0-0-0-0-0-0-1-0-0-0-0-0			16.2	0	0											QESARDXX
TDP069	ESARDXXX	0-1-1-1-1-1-1-1-1-1-1-1-1-1-1-1-1-0-0-0-0-0-0-0-0-0-0-0-0-0-0-0-1-1-0-0-1-1-0-1-1-1-1-0-1-1-1-4-1-0-1-0			42.8	0	0			ESARDXXX	ESARDXXX	ESARDXXX	ESARDXXX	ESARDXXX	ESARDXXX	ESARDXXX	ESARDXXX	ESARDXXX	ESARDXXX	ESARDXXX	ESARDXXX	ESARDXXX	ESARDXXX	ESARDXXX	ESARDXXX																ESARDXXX	ESARDXXX			ESARDXXX	ESARDXXX		ESARDXXX	ESARDXXX
TDP069	XXGWKTMA	0-1-0-1-0-0-0-0-1-1-1-1-1-0-0-0-1-0-1-0-0-0-0-0-0-0-0-0-0-0-0-1-0-1-0-0-1-0-0-0-0-0-1-0-0-0-1-2-1-0-1-1	1 times in 3 NECs		26.1	15.5	0			XXGWKTMA		XXGWKTMA					XXGWKTMA	XXGWKTMA	XXGWKTMA	XXGWKTMA	XXGWKTMA				XXGWKTMA		XXGWKTMA													XXGWKTMA		XXGWKTMA			XXGWKTMA
TDP069	GWKTMADS	0-0-0-0-0-0-0-0-0-0-0-0-0-0-0-0-0-0-0-0-0-0-0-0-0-0-0-0-0-0-0-0-0-0-0-0-0-0-0-0-0-0-0-0-0-0-1-2-0-0-0-1			25.5	0	0
TDP069	XGWKTMAD	0-0-0-0-0-0-0-0-0-0-0-0-0-0-0-0-0-0-0-0-0-0-0-0-0-0-0-0-0-0-0-0-0-0-0-0-0-0-0-0-0-0-1-1-0-0-0-2-1-0-1-1			27	0	0
--------
TDP069	GWKTMADSQESAR^d	0-1-1-1-1-1-1-1-1-1-1-1-1-1-1-1-1-0-0-0-0-0-0-0-0-0-0-0-0-0-0-0-1-1-0-0-1-1-0-1-1-1-1-0-1-1-1-1-1-0-1-0			42.8	0	0
TDP069	GWKTMADSQESARD	1-1-1-1-1-1-1-1-1-1-1-1-1-1-1-1-1-1-1-1-1-1-1-1-1-1-1-1-1-1-1-1-1-1-1-1-1-1-1-1-1-1-1-1-1-1-1-1-1-1-1-0	3 times in 3 NECs		37	33.9	0
TDP069	gw^KTMADSQESARD	0-1-0-1-0-0-0-0-1-1-1-1-1-0-0-0-1-0-1-0-0-0-0-0-0-0-0-0-0-0-0-1-0-1-0-0-1-0-0-0-0-0-1-0-0-0-1-1-1-0-1-1	1 times in 3 NECs		26.1	15.5	0
TDP069	gwk^TMADSQESARD	0-0-0-0-0-0-0-0-0-0-0-0-0-0-0-0-0-0-0-0-0-0-0-0-0-0-0-0-0-0-0-0-0-0-0-0-0-0-0-0-0-0-1-1-0-0-0-1-1-0-1-1			27	0	0
TDP069	gwkt^MADSQESAR^d	0-0-0-0-0-0-0-0-0-0-0-0-0-0-0-0-0-0-0-0-0-0-0-0-0-0-0-0-0-0-0-0-0-0-0-0-0-0-0-0-0-0-0-0-0-0-0-1-0-0-0-0			25.5	0	0
TDP069	gwkt^MADSQESARD	0-0-0-0-0-0-0-0-0-0-0-0-0-0-0-0-0-0-0-0-0-0-0-0-0-0-0-0-0-0-0-0-0-0-0-0-0-0-0-0-0-0-0-0-0-0-1-1-0-0-0-1			23.8	0	0
TDP069	GWKTMADSQE^sard	0-0-0-0-0-0-0-0-0-0-0-0-0-0-0-0-0-0-0-0-0-0-0-0-0-0-0-0-0-0-0-0-0-0-0-0-0-0-0-0-0-0-0-0-0-0-1-0-0-0-1-0			20.3	0	0
TDP069	GWKTMADSQESA^rd	0-0-0-0-0-0-0-0-0-1-0-0-0-0-0-0-0-0-0-0-0-0-0-0-0-0-0-0-0-0-0-0-0-0-0-0-0-0-0-0-0-0-0-0-0-0-1-0-0-0-0-0			16.2	0	0
TDP069	gwk^TMADSQESAR^d	0-0-0-0-0-0-0-0-0-0-0-0-0-0-0-0-0-0-0-0-0-0-0-0-0-0-0-0-0-0-0-0-0-0-0-0-0-0-0-0-0-0-0-0-0-0-0-1-0-0-0-0			18.6	0	0
TDP069	gw^KTMADSQESAR^d	0-0-0-0-0-0-0-0-0-0-0-0-0-0-0-0-0-0-0-0-0-0-0-0-0-0-0-0-0-0-0-0-0-0-0-0-0-0-0-0-0-0-0-0-0-0-0-1-0-0-0-0			18.8	0	0
TDP069	GWKTMADSQ^esard	0-0-0-0-0-0-0-0-0-0-0-0-0-0-0-0-0-0-0-0-0-0-0-0-0-0-0-0-0-0-0-0-0-0-0-0-0-0-0-0-0-0-0-0-0-0-1-1-0-0-1-0			19.2	0	0
TDP070	HNFHMAIG	0-0-0-1-2-0-0-0-0-0-0-2-3-5-0-2-2-3-0-0-0-0-0-0-0-0-0-0-0-0-0-0-0-0-0-0-0-0-0-0-2-1-2-1-1-1-3-3-2-2-3-3			23.7	0	0					HNFHMAIG	HNFHMAIG							HNFHMAIG	HNFHMAIG	HNFHMAIG		HNFHMAIG	HNFHMAIG	HNFHMAIG																							HNFHMAIG
TDP070	NFHMAIGA	0-0-0-2-2-0-0-0-0-0-0-0-0-0-0-0-0-0-0-0-0-0-0-0-0-0-0-0-0-0-0-0-0-0-0-0-0-0-0-0-0-0-1-0-0-1-2-2-0-2-1-0			20.8	0	0					NFHMAIGA	NFHMAIGA
TDP070	FHMAIGAR	0-0-0-0-0-0-0-0-0-0-0-0-0-0-0-0-0-0-0-0-0-0-0-0-0-0-0-0-0-0-0-0-0-0-0-0-0-0-0-0-0-0-0-0-0-0-2-0-0-2-0-0			22.6	0	0
TDP070	HMAIGARS	0-0-0-0-0-0-0-0-0-0-0-0-0-0-0-0-0-0-0-0-0-0-0-0-0-0-0-0-0-0-0-0-0-0-0-0-0-0-0-0-0-1-0-0-0-1-2-0-0-2-1-0			20	0	0
TDP070	MAIGARSD	0-0-0-0-1-0-0-0-0-0-0-0-0-0-0-0-0-0-0-0-0-0-0-0-0-0-0-0-0-0-0-0-0-0-0-0-0-0-0-0-0-0-0-0-0-0-0-0-0-0-0-0			15	0	0						MAIGARSD
TDP070	AIGARSDX	0-0-0-0-0-0-0-0-0-0-0-0-0-0-0-0-0-0-0-0-0-0-0-0-0-0-0-0-0-0-0-0-0-0-0-0-0-0-0-0-2-1-0-0-0-2-1-0-2-2-2-0			22.8	0	0																																										AIGARSDX
TDP070	IGARSDXX	0-0-0-1-2-0-1-0-2-2-0-0-1-2-0-0-0-0-0-0-0-0-0-0-0-0-0-0-0-0-0-0-0-0-0-0-0-0-0-0-0-0-0-0-0-0-0-0-0-0-1-0			40.7	0	0					IGARSDXX	IGARSDXX		IGARSDXX		IGARSDXX	IGARSDXX			IGARSDXX	IGARSDXX
TDP070	GARSDXXX	0-0-0-0-0-0-0-0-0-0-0-1-1-2-0-0-0-0-0-0-0-0-0-0-0-0-0-0-0-0-0-0-0-0-2-0-0-0-0-1-0-0-0-0-0-0-1-0-0-0-0-0			26.2	0	0													GARSDXXX	GARSDXXX	GARSDXXX																					GARSDXXX					GARSDXXX
TDP070	EWHNFHMA	0-0-0-0-0-0-0-0-0-0-0-0-0-0-0-0-0-0-0-0-0-0-0-0-0-0-0-0-0-0-0-0-0-0-0-0-0-0-0-0-0-0-1-0-0-1-1-0-0-0-1-0			20.5	0	0
TDP070	WHNFHMAI	0-0-0-1-1-0-0-0-0-0-0-0-0-0-0-0-0-0-0-0-0-0-0-0-0-0-0-0-0-0-0-0-0-0-0-0-0-0-0-0-0-0-0-0-0-0-1-0-0-1-1-0			19.5	0	0					WHNFHMAI	WHNFHMAI
TDP070	XEWHNFHM	0-0-0-0-0-0-0-0-0-0-0-0-0-0-0-0-0-0-0-0-0-0-0-0-0-0-0-0-0-0-0-0-0-0-0-0-0-0-0-0-0-0-1-0-0-0-0-0-0-1-1-0			25.2	0	0
TDP070	XXXEWHNF	0-0-0-0-0-0-0-0-0-0-0-0-0-0-0-0-0-0-0-0-0-0-0-0-0-0-0-0-0-0-0-0-0-0-0-0-0-0-0-0-0-1-0-0-0-1-1-0-0-0-0-0			28.6	0	0
--------
TDP070	EWHNFHMAIGARSD	2-2-2-2-2-2-2-2-2-2-2-2-2-1-2-2-2-2-2-2-2-2-2-1-2-1-2-2-2-2-2-2-2-2-2-2-2-2-2-2-2-2-1-1-2-2-1-1-2-2-2-1	6 times in 3 NECs		41.4	34.7	0
TDP070	EWHNFHMAIGAR^sd	0-0-0-1-2-0-1-0-2-2-0-0-1-1-0-0-0-0-0-0-0-0-0-0-0-0-0-0-0-0-0-0-0-0-0-0-0-0-0-0-0-0-0-0-0-0-0-0-0-0-1-0			40.7	0	0
TDP070	e^WHNFHMAIGARSD	0-0-0-0-0-0-0-0-0-0-0-0-0-0-0-0-0-0-0-0-0-0-0-0-0-0-0-0-0-0-0-0-0-0-0-0-0-0-0-0-0-1-0-0-0-1-1-0-0-0-0-0			28.6	0	0
TDP070	EWHNFHMAIGARS^d	0-0-0-0-0-0-0-0-0-0-0-1-1-1-0-0-0-0-0-0-0-0-0-0-0-0-0-0-0-0-0-0-0-0-2-0-0-0-0-1-0-0-0-0-0-0-1-0-0-0-0-0			26.2	0	0
TDP070	ewh^NFHMAIGARSD	0-0-0-0-0-0-0-0-0-0-0-0-0-0-0-0-0-0-0-0-0-0-0-0-0-0-0-0-0-0-0-0-0-0-0-0-0-0-0-0-0-0-1-0-0-0-0-0-0-1-1-0			25.2	0	0
TDP070	ewhn^FHMAIGARSD	0-0-0-0-0-0-0-0-0-0-0-0-0-0-0-0-0-0-0-0-0-0-0-0-0-0-0-0-0-0-0-0-0-0-0-0-0-0-0-0-0-0-1-0-0-1-1-0-0-0-1-0			20.5	0	0
TDP070	EWHNFH^maigarsd	0-0-0-1-1-0-0-0-0-0-0-1-2-2-0-1-1-2-0-0-0-0-0-0-0-0-0-0-0-0-0-0-0-0-0-0-0-0-0-0-1-1-2-1-1-1-2-2-1-1-2-2			19.5	0	0
TDP070	ewhnf^HMAIGARSD	0-0-0-1-1-0-0-0-0-0-0-0-0-0-0-0-0-0-0-0-0-0-0-0-0-0-0-0-0-0-0-0-0-0-0-0-0-0-0-0-0-0-0-0-0-0-1-0-0-1-1-0			19.5	0	0
TDP070	EWHNFHMAI^garsd	0-0-0-0-0-0-0-0-0-0-0-0-0-0-0-0-0-0-0-0-0-0-0-0-0-0-0-0-0-0-0-0-0-0-0-0-0-0-0-0-0-1-0-0-0-1-2-0-0-2-1-0			20	0	0
TDP070	ewhnfh^MAIGARSD	0-0-0-0-1-0-0-0-0-0-0-1-1-1-0-1-1-1-0-0-0-0-0-0-0-0-0-0-0-0-0-0-0-0-0-0-0-0-0-0-1-0-0-0-0-0-1-1-1-1-1-1			23.7	0	0
TDP070	EWHNFHM^aigarsd	0-0-0-2-2-0-0-0-0-0-0-0-0-0-0-0-0-0-0-0-0-0-0-0-0-0-0-0-0-0-0-0-0-0-0-0-0-0-0-0-0-0-1-0-0-1-2-2-0-2-1-0			20.8	0	0
TDP070	EWHNFHMA^igarsd	0-0-0-0-0-0-0-0-0-0-0-0-0-0-0-0-0-0-0-0-0-0-0-0-0-0-0-0-0-0-0-0-0-0-0-0-0-0-0-0-0-0-0-0-0-0-2-0-0-2-0-0			22.6	0	0
TDP070	EWHNFHMAIGA^rsd	0-0-0-0-0-0-0-0-0-0-0-0-0-0-0-0-0-0-0-0-0-0-0-0-0-0-0-0-0-0-0-0-0-0-0-0-0-0-0-0-2-1-0-0-0-2-1-0-2-2-2-0			22.8	0	0
TDP070	ewhnfh^MAIGARS^d	0-0-0-0-0-0-0-0-0-0-0-0-0-1-0-0-0-0-0-0-0-0-0-0-0-0-0-0-0-0-0-0-0-0-0-0-0-0-0-0-0-0-0-0-0-0-0-0-0-0-0-0			15.9	0	0
TDP070	EWHNFHMAIG^arsd	0-0-0-0-1-0-0-0-0-0-0-0-0-0-0-0-0-0-0-0-0-0-0-0-0-0-0-0-0-0-0-0-0-0-0-0-0-0-0-0-0-0-0-0-0-0-0-0-0-0-0-0			15	0	0
TDP070	ewhnfh^MAIGAR^sd	0-0-0-0-0-0-0-0-0-0-0-0-0-1-0-0-0-0-0-0-0-0-0-0-0-0-0-0-0-0-0-0-0-0-0-0-0-0-0-0-0-0-0-0-0-0-0-0-0-0-0-0			15.8	0	0
TDP071	XXFYAWKF	0-0-0-0-0-0-0-0-0-0-0-0-0-0-0-0-0-0-0-0-0-0-0-0-0-0-0-0-0-0-0-0-0-0-0-0-0-0-0-0-0-0-0-0-0-0-0-0-0-1-0-0			16.1	0	0
TDP071	FGIFYLNG	1-1-1-1-0-0-0-0-0-0-0-0-0-0-0-0-0-1-0-0-0-0-0-0-0-0-0-0-0-0-0-0-0-0-0-0-0-0-0-0-1-0-0-0-0-1-0-0-1-1-0-0			22.2	0	0		FGIFYLNG	FGIFYLNG	FGIFYLNG	FGIFYLNG														FGIFYLNG																							FGIFYLNG
TDP071	AWKFGIFY	0-1-1-1-1-0-0-0-0-0-0-0-0-0-0-0-0-0-0-0-0-0-0-0-0-0-0-0-0-0-0-0-0-0-0-0-0-0-0-0-1-1-0-0-1-1-1-0-1-1-0-0			18.2	0	0			AWKFGIFY	AWKFGIFY	AWKFGIFY	AWKFGIFY																																				AWKFGIFY
TDP071	WKFGIFYL	0-0-1-1-1-0-0-0-0-1-0-0-0-1-0-0-0-1-0-0-0-0-0-0-0-0-0-0-0-0-0-0-0-0-0-0-0-0-0-0-0-0-0-0-1-2-1-0-1-1-0-0			19	0	0				WKFGIFYL	WKFGIFYL	WKFGIFYL					WKFGIFYL				WKFGIFYL				WKFGIFYL
TDP071	KFGIFYLN	1-1-0-0-1-0-0-0-0-0-0-1-1-1-0-1-1-1-0-0-0-0-0-0-0-0-0-0-0-0-0-0-0-0-0-0-0-0-0-0-0-0-0-0-0-0-0-0-0-0-0-0			20.2	0	0		KFGIFYLN	KFGIFYLN			KFGIFYLN							KFGIFYLN	KFGIFYLN	KFGIFYLN		KFGIFYLN	KFGIFYLN	KFGIFYLN
TDP071	FYAWKFGI	0-0-0-0-0-0-0-0-0-0-0-0-0-0-0-0-0-0-0-0-0-0-0-0-0-0-0-0-0-0-0-0-0-0-0-0-0-0-0-0-0-0-0-0-0-1-0-0-0-0-0-0			25.7	0	0
TDP071	XXXFYAWK	0-0-0-0-0-0-0-0-0-0-0-0-0-0-0-0-0-0-0-0-0-0-0-0-0-0-0-0-0-0-0-0-0-0-0-0-0-0-0-0-0-0-0-0-0-1-0-0-0-0-0-0			15.3	0	0
--------
TDP071	FYAWKFGIFYLNGD	1-0-0-0-0-0-0-1-0-0-0-0-1-0-0-0-0-0-0-0-0-0-0-0-0-0-1-0-0-0-0-0-0-0-0-0-0-0-0-1-1-0-0-0-0-1-0-0-0-1-0-0	1 times in 3 NECs		24.2	19	0
TDP071	fyaw^KFGIFYLNGD	0-0-0-0-0-0-0-0-0-0-0-0-0-0-0-0-0-0-0-0-0-0-0-0-0-0-0-0-0-0-0-0-0-0-0-0-0-0-0-0-0-0-0-0-0-1-0-0-0-0-0-0			25.7	0	0
TDP071	FYAWKF^gifylngd	0-1-1-1-1-0-0-0-0-0-0-0-0-0-0-0-0-0-0-0-0-0-0-0-0-0-0-0-0-0-0-0-0-0-0-0-0-0-0-0-1-1-0-0-1-1-1-0-1-1-0-0			18.2	0	0
TDP071	FYAWKFGIF^ylngd	1-1-1-1-0-0-0-0-0-0-0-0-0-0-0-0-0-1-0-0-0-0-0-0-0-0-0-0-0-0-0-0-0-0-0-0-0-0-0-0-1-0-0-0-0-1-0-0-1-0-0-0			22.2	0	0
TDP071	FYAWKFG^ifylngd	0-0-1-1-1-0-0-0-0-1-0-0-0-1-0-0-0-1-0-0-0-0-0-0-0-0-0-0-0-0-0-0-0-0-0-0-0-0-0-0-0-0-0-0-1-1-1-0-1-1-0-0			19	0	0
TDP071	FYAWKFGI^fylngd	1-1-0-0-1-0-0-0-0-0-0-1-1-1-0-1-1-1-0-0-0-0-0-0-0-0-0-0-0-0-0-0-0-0-0-0-0-0-0-0-0-0-0-0-0-0-0-0-0-0-0-0			20.2	0	0
TDP071	fy^AWKFGIF^ylngd	0-0-0-0-0-0-0-0-0-0-0-0-0-0-0-0-0-0-0-0-0-0-0-0-0-0-0-0-0-0-0-0-0-0-0-0-0-0-0-0-0-0-0-0-0-0-0-0-0-1-0-0			16.1	0	0
TDP071	f^YAWKFG^ifylngd	0-0-0-0-0-0-0-0-0-0-0-0-0-0-0-0-0-0-0-0-0-0-0-0-0-0-0-0-0-0-0-0-0-0-0-0-0-0-0-0-0-0-0-0-0-1-0-0-0-0-0-0			15.3	0	0
TDP072	KYVLGWLN	0-0-0-0-0-0-0-0-0-0-0-0-0-0-0-0-0-0-0-0-0-0-0-0-0-0-0-0-0-0-0-0-0-0-0-0-0-0-0-0-1-1-1-0-1-2-3-1-1-2-2-0			28	0	0																																										KYVLGWLN
TDP072	NTSRQAEX	0-0-0-0-0-0-0-0-0-0-0-0-0-0-0-0-0-0-0-0-0-0-0-0-0-0-0-0-0-0-0-0-0-0-0-0-0-0-0-0-1-3-1-0-0-2-1-1-1-1-0-0			25	0	0																																										NTSRQAEX
TDP072	TSRQAEXX	0-0-0-0-1-0-0-0-0-1-0-1-0-1-0-0-0-0-0-0-0-0-0-0-0-0-0-0-0-0-0-0-0-0-0-0-0-0-0-0-1-2-2-0-1-3-5-0-1-3-4-0			30.5	0	0						TSRQAEXX					TSRQAEXX		TSRQAEXX		TSRQAEXX																											TSRQAEXX
TDP072	LGWLNTSR	0-0-0-0-0-0-0-0-0-0-0-0-0-0-0-0-0-0-0-0-0-0-0-0-0-0-0-0-0-0-0-0-0-0-0-0-0-0-0-0-0-0-0-0-0-0-0-0-0-1-1-0			15.2	0	0
TDP072	GWLNTSRQ	0-0-0-0-1-0-0-0-0-0-0-0-1-1-0-0-1-1-0-0-0-0-0-0-0-0-0-0-0-0-0-0-0-0-0-0-0-0-0-0-1-1-0-0-1-1-1-0-1-1-1-0			19.1	0	0						GWLNTSRQ								GWLNTSRQ	GWLNTSRQ			GWLNTSRQ	GWLNTSRQ																							GWLNTSRQ
TDP072	WLNTSRQA	0-0-0-0-1-0-0-0-0-0-0-0-0-0-0-0-0-0-0-0-0-0-0-0-0-0-0-0-0-0-0-0-0-0-0-0-0-0-0-0-0-1-0-0-0-0-0-0-0-0-0-0			19.6	0	0						WLNTSRQA
TDP072	LNTSRQAE	0-0-0-0-0-0-0-0-0-0-0-0-0-0-0-0-0-0-0-0-0-0-0-0-0-0-0-0-0-0-0-0-0-0-0-0-0-0-0-0-0-1-0-0-0-1-1-0-0-1-0-0			22	0	0
TDP072	SRQAEXXX	0-0-1-0-0-0-0-0-1-1-0-1-1-1-0-1-1-0-0-0-0-0-0-0-0-0-0-0-0-0-0-0-0-0-1-0-0-0-0-1-0-0-0-0-0-1-1-0-0-0-0-0			24.7	0	0				SRQAEXXX						SRQAEXXX	SRQAEXXX		SRQAEXXX	SRQAEXXX	SRQAEXXX		SRQAEXXX	SRQAEXXX																		SRQAEXXX					SRQAEXXX
TDP072	XKYVLGWL	0-0-0-0-0-0-0-0-0-0-0-0-0-0-0-0-0-0-0-0-0-1-0-0-0-0-0-0-0-0-0-0-0-0-0-0-0-0-0-0-0-0-0-0-0-0-1-0-0-0-0-0			20.3	0	0																							XKYVLGWL
TDP072	VLGWLNTS	0-0-0-0-0-0-0-0-0-0-1-0-0-0-0-1-1-0-0-0-0-0-0-0-0-0-0-0-0-0-1-0-1-1-0-0-0-0-1-0-0-0-0-0-0-0-1-1-0-0-0-0	1 times in 3 NECs		21.1	17.3	0												VLGWLNTS					VLGWLNTS	VLGWLNTS														VLGWLNTS		VLGWLNTS	VLGWLNTS					VLGWLNTS
TDP072	XXKYVLGW	0-0-0-0-0-0-0-0-0-0-0-0-0-0-0-0-0-0-1-0-1-1-0-0-0-0-0-0-0-1-0-0-0-0-0-0-0-0-0-0-0-2-1-0-0-1-0-0-0-0-1-0			29.3	0	0																				XXKYVLGW		XXKYVLGW	XXKYVLGW								XXKYVLGW
TDP072	YVLGWLNT	0-0-0-0-0-0-0-0-0-0-0-0-0-1-0-0-0-0-0-0-0-0-0-0-0-0-0-0-0-0-0-0-0-0-0-0-0-0-0-0-1-1-2-0-1-1-3-2-0-2-2-0			20.7	0	0															YVLGWLNT																											YVLGWLNT
TDP072	XXXKYVLG	0-0-0-0-0-0-0-0-0-0-0-0-0-0-0-0-0-0-1-0-1-1-0-0-0-0-0-0-0-0-0-0-0-0-0-0-0-0-0-0-1-2-0-0-1-3-2-0-0-0-0-0			33.6	0	0																				XXXKYVLG		XXXKYVLG	XXXKYVLG																			XXXKYVLG
--------
TDP072	KYVLGWLNTSRQAE	1-1-1-1-1-1-1-1-1-1-1-1-1-1-1-1-1-1-1-1-1-1-1-1-1-1-1-1-1-1-1-1-1-1-1-1-1-1-1-1-1-1-0-1-1-1-1-1-1-1-1-0	3 times in 3 NECs		37.8	33.8	0
TDP072	k^YVLGWLNTSR^qae	0-0-0-0-0-0-0-0-0-0-0-0-0-0-0-0-0-0-0-0-0-0-0-0-0-0-0-0-0-0-0-0-0-0-0-0-0-0-0-0-0-1-0-0-0-1-0-0-0-0-0-0			25	0	0
TDP072	k^YVLGWLNTSRQAE	0-0-0-0-0-0-0-0-0-0-0-0-0-0-0-0-0-0-1-0-1-1-0-0-0-0-0-0-0-0-0-0-0-0-0-0-0-0-0-0-1-0-0-0-1-1-1-0-0-0-0-0			33.6	0	0
TDP072	KYVLGWLNTSR^qae	0-0-0-0-0-0-0-0-0-0-0-0-0-0-0-0-0-0-0-0-0-0-0-0-0-0-0-0-0-0-0-0-0-0-0-0-0-0-0-0-1-1-0-0-0-1-0-0-1-1-0-0			24.8	0	0
TDP072	ky^VLGWLNTSRQAE	0-0-0-0-0-0-0-0-0-0-0-0-0-0-0-0-0-0-1-0-1-1-0-0-0-0-0-0-0-1-0-0-0-0-0-0-0-0-0-0-0-1-0-0-0-1-0-0-0-0-0-0			29.3	0	0
TDP072	ky^VLGWLNTSRQ^ae	0-0-0-0-0-0-0-0-0-0-0-0-0-0-0-0-0-0-0-0-0-0-0-0-0-0-0-0-0-0-0-0-0-0-0-0-0-0-0-0-0-0-1-0-0-0-0-0-0-0-1-0			24.6	0	0
TDP072	KYVLGWLNTSRQ^ae	0-0-0-0-1-0-0-0-0-1-0-1-0-1-0-0-0-0-0-0-0-0-0-0-0-0-0-0-0-0-0-0-0-0-0-0-0-0-0-0-1-1-0-0-1-1-1-0-1-1-1-0			30.5	0	0
TDP072	KYVLGWLNTSRQA^e	0-0-1-0-0-0-0-0-1-1-0-1-1-1-0-1-1-0-0-0-0-0-0-0-0-0-0-0-0-0-0-0-0-0-1-0-0-0-0-1-0-0-0-0-0-1-0-0-0-0-0-0			24.7	0	0
TDP072	k^YVLGWLNTSRQ^ae	0-0-0-0-0-0-0-0-0-0-0-0-0-0-0-0-0-0-0-0-0-0-0-0-0-0-0-0-0-0-0-0-0-0-0-0-0-0-0-0-0-1-0-0-0-1-1-0-0-0-0-0			26	0	0
TDP072	KYVLGWLNTS^rqae	0-0-0-0-0-0-0-0-0-0-0-0-0-0-0-0-0-0-0-0-0-0-0-0-0-0-0-0-0-0-0-0-0-0-0-0-0-0-0-0-0-1-0-0-0-1-1-0-0-1-0-0			22	0	0
TDP072	kyvl^GWLNTSRQAE	0-0-0-0-0-0-0-0-0-0-0-0-0-0-0-0-0-0-0-0-0-0-0-0-0-0-0-0-0-0-0-0-0-0-0-0-0-0-0-0-1-1-1-0-1-1-1-1-1-1-1-0			28	0	0
TDP072	kyvlgw^LNTSRQAE	0-0-0-0-0-0-0-0-0-0-1-0-0-0-0-1-1-0-0-0-0-0-0-0-0-0-0-0-0-0-1-0-1-1-0-0-0-0-1-0-0-0-0-0-0-0-1-1-0-0-0-0	1 times in 3 NECs		21.1	17.3	0
TDP072	kyv^LGWLNTSRQAE	0-0-0-0-0-0-0-0-0-0-0-0-0-0-0-0-0-0-0-0-0-1-0-0-0-0-0-0-0-0-0-0-0-0-0-0-0-0-0-0-0-0-0-0-0-0-0-0-0-0-0-0			18	0	0
TDP072	KYVLGWLNT^srqae	0-0-0-0-1-0-0-0-0-0-0-0-0-0-0-0-0-0-0-0-0-0-0-0-0-0-0-0-0-0-0-0-0-0-0-0-0-0-0-0-0-1-0-0-0-0-0-0-0-0-0-0			19.6	0	0
TDP072	kyvlg^WLNTSRQAE	0-0-0-0-0-0-0-0-0-0-0-0-0-1-0-0-0-0-0-0-0-0-0-0-0-0-0-0-0-0-0-0-0-0-0-0-0-0-0-0-1-1-0-0-1-1-1-1-0-1-1-0			20.7	0	0
TDP072	kyv^LGWLNTSRQ^ae	0-0-0-0-0-0-0-0-0-0-0-0-0-0-0-0-0-0-0-0-0-0-0-0-0-0-0-0-0-0-0-0-0-0-0-0-0-0-0-0-0-0-0-0-0-0-1-0-0-0-0-0			20.3	0	0
TDP072	kyvlg^WLNTSR^qae	0-0-0-0-0-0-0-0-0-0-0-0-0-0-0-0-0-0-0-0-0-0-0-0-0-0-0-0-0-0-0-0-0-0-0-0-0-0-0-0-0-0-1-0-0-0-0-1-0-0-0-0			17.5	0	0
TDP072	KYVLGWLN^tsrqae	0-0-0-0-1-0-0-0-0-0-0-0-1-1-0-0-1-1-0-0-0-0-0-0-0-0-0-0-0-0-0-0-0-0-0-0-0-0-0-0-1-1-0-0-1-1-1-0-1-1-1-0			19.1	0	0
TDP072	ky^VLGWLNTSR^qae	0-0-0-0-0-0-0-0-0-0-0-0-0-0-0-0-0-0-0-0-0-0-0-0-0-0-0-0-0-0-0-0-0-0-0-0-0-0-0-0-0-1-0-0-0-0-0-0-0-0-0-0			20.5	0	0
TDP072	kyvlg^WLNTSRQA^e	0-0-0-0-0-0-0-0-0-0-0-0-0-0-0-0-0-0-0-0-0-0-0-0-0-0-0-0-0-0-0-0-0-0-0-0-0-0-0-0-0-0-0-0-0-0-1-0-0-0-0-0			18.8	0	0
TDP072	kyvl^GWLNTSR^qae	0-0-0-0-0-0-0-0-0-0-0-0-0-0-0-0-0-0-0-0-0-0-0-0-0-0-0-0-0-0-0-0-0-0-0-0-0-0-0-0-0-0-0-0-0-0-1-0-0-0-0-0			17.9	0	0
TDP072	KYVLGWL^ntsrqae	0-0-0-0-0-0-0-0-0-0-0-0-0-0-0-0-0-0-0-0-0-0-0-0-0-0-0-0-0-0-0-0-0-0-0-0-0-0-0-0-0-0-0-0-0-0-0-0-0-1-1-0			15.2	0	0
TDP072	kyvlg^WLNTSRQ^ae	0-0-0-0-0-0-0-0-0-0-0-0-0-0-0-0-0-0-0-0-0-0-0-0-0-0-0-0-0-0-0-0-0-0-0-0-0-0-0-0-0-0-1-0-0-0-1-0-0-1-1-0			16.5	0	0
TDP072	kyvl^GWLNTSRQ^ae	0-0-0-0-0-0-0-0-0-0-0-0-0-0-0-0-0-0-0-0-0-0-0-0-0-0-0-0-0-0-0-0-0-0-0-0-0-0-0-0-0-0-0-0-0-1-1-0-0-1-1-0			18.6	0	0
TDP073	XMYFKYIW	0-0-0-0-0-0-0-0-0-0-0-0-0-0-0-0-0-0-0-0-0-0-0-0-0-0-0-0-0-0-0-0-0-0-0-0-0-0-0-0-1-0-0-0-1-1-0-0-1-1-1-0			18.7	0	0																																										XMYFKYIW
TDP073	KYIWYVQT	0-0-0-1-0-0-0-0-0-0-0-0-0-0-0-0-0-0-0-0-0-0-0-0-0-0-0-0-0-0-0-0-0-0-0-0-0-0-0-0-1-0-0-0-0-1-0-0-1-0-0-0			17.1	0	0					KYIWYVQT																																					KYIWYVQT
--------
TDP073	MYFKYIWYVQTADD	0-0-0-0-0-0-0-0-0-0-0-1-0-0-0-0-0-0-0-0-0-0-0-0-0-0-1-0-0-0-0-0-0-0-0-0-0-0-0-0-0-0-0-0-0-0-0-0-0-0-0-0			18.5	0	0
TDP073	myf^KYIWYVQTADD	0-0-0-0-0-0-0-0-0-0-0-0-0-0-0-0-0-0-0-0-0-0-0-0-0-0-0-0-0-0-0-0-0-0-0-0-0-0-0-0-1-0-0-0-1-1-0-0-1-1-1-0			18.7	0	0
TDP073	MYFKYIW^yvqtadd	0-0-0-1-0-0-0-0-0-0-0-0-0-0-0-0-0-0-0-0-0-0-0-0-0-0-0-0-0-0-0-0-0-0-0-0-0-0-0-0-1-0-0-0-0-1-0-0-1-0-0-0			17.1	0	0
TDP074	SLYRMIRQ	0-0-0-0-0-0-0-0-0-0-0-0-1-0-0-0-0-0-0-0-0-0-0-0-0-0-0-0-0-0-0-0-0-0-0-0-0-0-0-0-1-0-0-0-1-2-1-0-1-0-0-0			31.7	0	0														SLYRMIRQ																												SLYRMIRQ
TDP074	LYRMIRQE	1-1-0-0-0-0-0-0-0-1-1-1-0-0-0-1-0-1-0-1-1-1-0-0-0-0-0-0-0-0-0-0-0-0-0-0-0-0-0-0-1-0-0-0-1-1-0-0-1-0-0-0			26.9	0	0		LYRMIRQE	LYRMIRQE								LYRMIRQE	LYRMIRQE	LYRMIRQE				LYRMIRQE		LYRMIRQE		LYRMIRQE	LYRMIRQE	LYRMIRQE																			LYRMIRQE
TDP074	RMIRQEXX	0-0-0-0-0-0-0-1-0-1-0-1-0-0-0-0-0-0-0-0-0-0-0-0-0-0-0-0-0-0-0-0-0-0-0-0-0-0-0-0-2-0-0-0-0-2-1-0-2-1-0-0			31.7	0	0									RMIRQEXX		RMIRQEXX		RMIRQEXX																													RMIRQEXX
TDP074	XAYNMWSL	0-0-0-0-0-0-0-0-0-0-0-0-0-0-0-0-0-0-0-0-0-0-0-0-0-0-0-0-0-0-0-0-0-0-0-0-0-0-0-0-1-0-0-0-0-0-0-0-1-0-0-0			19.5	0	0																																										XAYNMWSL
TDP074	NMWSLYRM	0-0-0-0-0-0-0-0-0-0-0-0-0-0-0-0-0-0-0-0-0-0-0-0-0-0-0-0-0-0-0-0-0-0-0-0-0-0-0-0-1-0-0-0-1-1-1-0-1-0-0-0			19.4	0	0																																										NMWSLYRM
TDP074	XXAYNMWS	0-0-0-0-0-0-0-0-0-0-0-0-0-0-0-0-0-0-0-0-0-1-0-0-0-0-0-0-0-0-0-0-0-0-0-0-0-0-0-0-1-0-0-0-1-1-1-0-0-0-0-0			24.2	0	0																							XXAYNMWS																			XXAYNMWS
TDP074	WSLYRMIR	0-0-0-0-0-0-0-0-0-0-0-0-0-0-0-0-1-0-0-0-0-0-0-0-0-0-0-0-0-0-0-0-0-0-0-0-0-0-0-0-0-0-0-0-0-0-0-0-0-0-0-1			16.6	0	0																		WSLYRMIR
TDP074	YNMWSLYR	0-0-0-0-0-0-0-0-0-0-0-0-0-0-0-0-0-0-0-0-1-1-0-0-0-0-0-0-0-1-0-1-1-1-0-0-1-1-1-1-2-1-0-0-1-2-2-0-2-2-0-0			27.6	0	0																						YNMWSLYR	YNMWSLYR								YNMWSLYR		YNMWSLYR	YNMWSLYR	YNMWSLYR			YNMWSLYR	YNMWSLYR	YNMWSLYR	YNMWSLYR	YNMWSLYR
TDP074	AYNMWSLY	0-0-0-0-0-0-0-0-0-0-0-0-0-0-0-0-0-0-0-0-0-0-0-0-0-1-0-0-0-0-0-0-0-0-0-0-0-0-0-0-0-0-0-0-0-1-0-0-0-0-0-0			17.4	0	0																											AYNMWSLY
TDP074	XXXAYNMW	0-0-0-0-0-0-0-0-0-0-0-0-0-0-0-0-0-0-0-0-0-0-0-0-0-0-0-0-0-0-0-0-0-0-0-0-0-0-0-0-0-0-0-0-1-0-0-0-0-0-0-0			20.2	0	0
TDP074	MWSLYRMI	0-1-1-1-1-0-0-0-0-0-1-1-2-1-0-1-2-1-0-0-0-0-0-0-0-0-0-0-0-0-0-0-0-0-0-0-0-0-0-0-0-0-0-0-0-0-1-0-0-0-1-0			20.6	0	0			MWSLYRMI	MWSLYRMI	MWSLYRMI	MWSLYRMI						MWSLYRMI	MWSLYRMI	MWSLYRMI	MWSLYRMI		MWSLYRMI	MWSLYRMI	MWSLYRMI
TDP074	MIRQEXXX	0-0-0-0-0-0-0-0-0-0-0-0-1-0-0-0-1-0-0-0-0-0-0-0-0-0-0-0-0-0-0-0-0-0-0-0-0-0-0-0-0-0-0-0-0-0-0-0-0-0-0-0			17.4	0	0														MIRQEXXX				MIRQEXXX
--------
TDP074	AYNMWSLYRMIRQE	1-1-0-0-0-0-1-1-1-1-1-1-0-0-1-1-0-1-1-1-1-1-1-1-0-0-1-1-1-1-0-1-0-1-1-1-0-0-1-1-1-0-1-0-1-0-1-0-1-0-1-1	2 times in 3 NECs		30.4	24.5	0
TDP074	AYNMWSLYRMIR^qe	0-0-0-0-0-0-0-1-0-1-0-1-0-0-0-0-0-0-0-0-0-0-0-0-0-0-0-0-0-0-0-0-0-0-0-0-0-0-0-0-1-0-0-0-0-1-0-0-1-0-0-0			31.7	0	0
TDP074	AYNMWSLYR^mirqe	0-0-0-0-0-0-0-0-0-0-0-0-1-0-0-0-0-0-0-0-0-0-0-0-0-0-0-0-0-0-0-0-0-0-0-0-0-0-0-0-1-0-0-0-1-1-0-0-1-0-0-0			31.7	0	0
TDP074	AYNMWSLYRM^irqe	1-1-0-0-0-0-0-0-0-1-1-1-0-0-0-1-0-1-0-1-1-1-0-0-0-0-0-0-0-0-0-0-0-0-0-0-0-0-0-0-1-0-0-0-1-1-0-0-1-0-0-0			26.9	0	0
TDP074	a^YNMWSLYRMIRQE	0-0-0-0-0-0-0-0-0-0-0-0-0-0-0-0-0-0-0-0-0-0-0-0-0-0-0-0-0-0-0-0-0-0-0-0-0-0-0-0-0-0-0-0-1-0-0-0-0-0-0-0			20.2	0	0
TDP074	ay^NMWSLYR^mirqe	0-0-0-0-0-0-0-0-0-0-0-0-0-0-0-0-0-0-0-0-0-0-0-0-0-0-0-0-0-0-0-0-0-0-0-0-0-0-0-0-0-0-0-0-0-1-1-0-0-0-0-0			24.2	0	0
TDP074	aynm^WSLYRMIRQE	0-0-0-0-0-0-0-0-0-0-0-0-0-0-0-0-0-0-0-0-0-0-0-0-0-1-0-0-0-0-0-0-0-0-0-0-0-0-0-0-0-0-0-0-0-1-0-0-0-0-0-0			17.4	0	0
TDP074	ay^NMWSLYRMIRQE	0-0-0-0-0-0-0-0-0-0-0-0-0-0-0-0-0-0-0-0-0-1-0-0-0-0-0-0-0-0-0-0-0-0-0-0-0-0-0-0-1-0-0-0-1-0-0-0-0-0-0-0			18.7	0	0
TDP074	aynmw^SLYRMIRQE	0-0-0-0-0-0-0-0-0-0-0-0-0-0-0-0-0-0-0-0-1-1-0-0-0-0-0-0-0-1-0-1-1-1-0-0-1-1-1-1-1-1-0-0-1-1-1-0-1-1-0-0			27.6	0	0
TDP074	aynmw^SLYRMIR^qe	0-0-0-0-0-0-0-0-0-0-0-0-0-0-0-0-0-0-0-0-0-0-0-0-0-0-0-0-0-0-0-0-0-0-0-0-0-0-0-0-1-0-0-0-0-1-1-0-1-1-0-0			19.9	0	0
TDP074	aynmwsl^YRMIRQE	0-1-1-1-1-0-0-0-0-0-1-1-1-1-0-1-1-1-0-0-0-0-0-0-0-0-0-0-0-0-0-0-0-0-0-0-0-0-0-0-0-0-0-0-0-0-1-0-0-0-1-0			20.6	0	0
TDP074	ayn^MWSLYRMIRQE	0-0-0-0-0-0-0-0-0-0-0-0-0-0-0-0-0-0-0-0-0-0-0-0-0-0-0-0-0-0-0-0-0-0-0-0-0-0-0-0-1-0-0-0-0-0-0-0-1-0-0-0			19.5	0	0
TDP074	aynmws^LYRMIRQE	0-0-0-0-0-0-0-0-0-0-0-0-0-0-0-0-0-0-0-0-0-0-0-0-0-0-0-0-0-0-0-0-0-0-0-0-0-0-0-0-1-0-0-0-1-1-1-0-1-0-0-0			19.4	0	0
TDP074	aynmwsl^YRMIRQ^e	0-0-0-0-0-0-0-0-0-0-0-0-1-0-0-0-1-0-0-0-0-0-0-0-0-0-0-0-0-0-0-0-0-0-0-0-0-0-0-0-0-0-0-0-0-0-0-0-0-0-0-0			17.4	0	0
TDP074	aynmwsly^RMIRQE	0-0-0-0-0-0-0-0-0-0-0-0-0-0-0-0-1-0-0-0-0-0-0-0-0-0-0-0-0-0-0-0-0-0-0-0-0-0-0-0-0-0-0-0-0-0-0-0-0-0-0-1			16.6	0	0
TDP075	NFMAFMKW	0-1-1-1-1-0-0-0-0-0-0-0-0-0-0-0-0-0-0-0-0-0-0-0-0-0-0-0-0-0-0-0-0-0-0-0-0-0-0-0-0-0-0-0-0-1-1-0-0-1-0-0			22.1	0	0			NFMAFMKW	NFMAFMKW	NFMAFMKW	NFMAFMKW
TDP075	MAFMKWHE	0-0-0-0-0-0-0-0-0-0-0-0-0-0-0-0-0-0-0-0-0-0-0-0-0-0-0-0-0-0-0-0-0-0-0-0-0-0-0-0-1-0-0-0-0-0-1-0-0-0-0-0			19.9	0	0																																										MAFMKWHE
TDP075	XXNFMAFM	0-0-0-0-0-0-0-0-0-0-0-0-0-0-0-0-0-0-0-0-0-0-0-0-0-0-0-0-0-0-0-0-0-0-0-0-0-0-0-0-0-1-0-0-0-0-1-0-0-2-0-0			23.5	0	0
TDP075	FMKWHEGQ	0-0-0-0-0-0-0-0-0-0-0-0-0-0-0-0-0-0-0-0-0-0-0-0-0-0-0-0-0-0-0-0-0-0-0-0-0-0-0-0-0-2-0-0-0-1-1-0-1-1-0-0			17.3	0	0
TDP075	FMAFMKWH	0-1-0-1-1-0-0-0-0-0-1-1-1-1-1-1-1-1-0-0-0-0-0-0-0-0-0-0-0-0-0-0-0-0-0-0-0-0-0-0-1-1-0-0-1-1-1-0-0-0-0-0			18.5	0	0			FMAFMKWH		FMAFMKWH	FMAFMKWH						FMAFMKWH	FMAFMKWH	FMAFMKWH	FMAFMKWH	FMAFMKWH	FMAFMKWH	FMAFMKWH	FMAFMKWH																							FMAFMKWH
TDP075	AFMKWHEG	0-0-0-0-0-0-0-1-0-0-0-0-0-0-0-0-0-0-0-0-0-0-0-0-0-0-0-0-0-0-0-0-0-0-0-0-0-0-0-1-1-1-0-0-1-1-0-0-1-1-1-0			19	0	0									AFMKWHEG																																AFMKWHEG	AFMKWHEG
TDP075	MKWHEGQY	0-0-0-0-0-0-0-0-0-0-0-0-0-0-0-0-0-0-0-0-0-0-0-0-0-0-0-0-0-0-0-0-0-0-0-0-0-0-0-0-0-0-0-0-0-1-0-0-1-1-0-0			28	0	0
TDP075	KWHEGQYE	0-0-0-0-0-0-0-0-0-0-0-0-0-0-0-0-0-0-0-0-0-0-0-0-0-0-0-0-0-0-0-0-0-0-0-0-0-0-0-0-1-0-0-0-1-1-1-0-1-0-0-0			26.5	0	0																																										KWHEGQYE
TDP075	WHEGQYEX	0-0-0-0-0-0-0-0-0-1-0-0-0-0-0-0-0-0-0-0-0-0-0-0-0-0-0-0-0-0-0-0-0-0-0-0-0-0-0-0-0-0-0-0-0-1-1-0-1-0-0-0			17.4	0	0											WHEGQYEX
TDP075	EGQYEXXX	0-0-0-0-0-0-0-0-0-0-0-0-0-0-0-0-0-0-0-0-0-0-0-0-0-0-0-0-0-0-0-0-0-0-0-0-0-0-0-1-0-0-0-0-0-0-0-0-0-0-0-0			15.7	0	0																																									EGQYEXXX
--------
TDP075	NFMAFMKWHEGQYE	1-1-0-0-0-1-1-1-1-1-1-1-0-0-1-1-0-0-1-1-1-0-1-1-0-0-1-1-1-1-1-1-1-1-1-1-1-1-0-1-1-0-0-0-1-1-1-0-1-1-0-0	3 times in 3 NECs		30.1	27.3	0
TDP075	nf^MAFMKWHEGQYE	0-0-0-0-0-0-0-0-0-0-0-0-0-0-0-0-0-0-0-0-0-0-0-0-0-0-0-0-0-0-0-0-0-0-0-0-0-0-0-0-0-0-0-0-0-0-0-0-0-1-0-0			23.5	0	0
TDP075	nfma^FMKWHEGQYE	0-1-1-1-1-0-0-0-0-0-0-0-0-0-0-0-0-0-0-0-0-0-0-0-0-0-0-0-0-0-0-0-0-0-0-0-0-0-0-0-0-0-0-0-0-1-1-0-0-1-0-0			22.1	0	0
TDP075	NFMAFMKWH^egqye	0-0-0-0-0-0-0-0-0-0-0-0-0-0-0-0-0-0-0-0-0-0-0-0-0-0-0-0-0-0-0-0-0-0-0-0-0-0-0-0-0-0-0-0-0-1-0-0-1-1-0-0			28	0	0
TDP075	NFMAFMKWHE^gqye	0-0-0-0-0-0-0-0-0-0-0-0-0-0-0-0-0-0-0-0-0-0-0-0-0-0-0-0-0-0-0-0-0-0-0-0-0-0-0-0-1-0-0-0-1-1-1-0-1-0-0-0			26.5	0	0
TDP075	nfmaf^MKWHEGQYE	0-1-0-1-1-0-0-0-0-0-1-1-1-1-1-1-1-1-0-0-0-0-0-0-0-0-0-0-0-0-0-0-0-0-0-0-0-0-0-0-1-1-0-0-1-1-1-0-0-0-0-0			18.5	0	0
TDP075	NFMAFMKWHEG^qye	0-0-0-0-0-0-0-0-0-1-0-0-0-0-0-0-0-0-0-0-0-0-0-0-0-0-0-0-0-0-0-0-0-0-0-0-0-0-0-0-0-0-0-0-0-1-1-0-1-0-0-0			17.4	0	0
TDP075	NFMAFMK^whegqye	0-0-0-0-0-0-0-1-0-0-0-0-0-0-0-0-0-0-0-0-0-0-0-0-0-0-0-0-0-0-0-0-0-0-0-0-0-0-0-1-1-1-0-0-1-1-0-0-1-1-1-0			19	0	0
TDP075	nfmafm^KWHEGQYE	0-0-0-0-0-0-0-0-0-0-0-0-0-0-0-0-0-0-0-0-0-0-0-0-0-0-0-0-0-0-0-0-0-0-0-0-0-0-0-0-1-0-0-0-0-0-1-0-0-0-0-0			19.9	0	0
TDP075	NFMAFMKWHEGQY^e	0-0-0-0-0-0-0-0-0-0-0-0-0-0-0-0-0-0-0-0-0-0-0-0-0-0-0-0-0-0-0-0-0-0-0-0-0-0-0-1-0-0-0-0-0-0-0-0-0-0-0-0			15.7	0	0
TDP075	nf^MAFMKW^hegqye	0-0-0-0-0-0-0-0-0-0-0-0-0-0-0-0-0-0-0-0-0-0-0-0-0-0-0-0-0-0-0-0-0-0-0-0-0-0-0-0-0-1-0-0-0-0-1-0-0-1-0-0			17	0	0
TDP075	NFMAFMKW^hegqye	0-0-0-0-0-0-0-0-0-0-0-0-0-0-0-0-0-0-0-0-0-0-0-0-0-0-0-0-0-0-0-0-0-0-0-0-0-0-0-0-0-1-0-0-0-1-0-0-1-0-0-0			17.3	0	0
TDP076	EYSWMNLI	0-0-0-0-1-0-0-0-0-0-0-0-0-0-0-0-0-0-0-0-0-0-0-0-0-0-0-0-0-0-0-0-0-0-0-0-0-0-0-0-0-0-0-0-0-0-0-1-0-0-0-0			16.7	0	0						EYSWMNLI
TDP076	YSWMNLIQ	0-0-0-0-0-0-0-0-0-0-0-0-0-0-0-0-0-0-0-0-0-0-0-0-0-0-0-0-0-0-0-0-0-0-0-0-0-0-0-0-0-1-1-0-0-0-1-1-1-0-1-1			16.6	0	0
TDP076	SWMNLIQX	0-0-0-1-0-0-0-0-0-1-0-0-0-1-0-0-0-0-0-0-0-0-0-0-0-0-0-0-0-0-0-0-0-0-0-0-0-0-0-0-0-0-1-0-0-0-1-1-0-1-0-1			19.5	0	0					SWMNLIQX						SWMNLIQX				SWMNLIQX
TDP076	WMNLIQXX	0-1-1-1-1-0-0-0-0-1-0-0-0-1-0-0-0-0-0-0-0-0-0-0-0-0-0-0-0-0-0-0-0-0-0-0-0-0-0-0-0-0-0-0-0-0-1-0-1-1-1-0			22.6	0	0			WMNLIQXX	WMNLIQXX	WMNLIQXX	WMNLIQXX					WMNLIQXX				WMNLIQXX
TDP076	XXXDDRQK	0-0-1-0-0-0-1-0-0-0-0-0-1-0-0-0-1-0-1-1-1-1-0-0-0-0-0-1-1-1-0-0-0-1-0-1-0-1-0-0-0-0-0-0-1-0-0-0-1-1-0-0	1 times in 3 NECs		25.4	23.6	0				XXXDDRQK				XXXDDRQK						XXXDDRQK				XXXDDRQK		XXXDDRQK	XXXDDRQK	XXXDDRQK	XXXDDRQK						XXXDDRQK	XXXDDRQK	XXXDDRQK				XXXDDRQK		XXXDDRQK		XXXDDRQK
TDP076	XXDDRQKE	0-0-0-0-0-1-1-1-0-0-0-1-1-0-1-0-0-0-0-1-0-0-0-0-0-0-0-0-0-0-0-1-1-1-1-0-1-0-0-0-1-0-0-0-0-0-0-0-0-0-0-0	2 times in 3 NECs		27.9	22.6	0							XXDDRQKE	XXDDRQKE	XXDDRQKE				XXDDRQKE	XXDDRQKE		XXDDRQKE					XXDDRQKE												XXDDRQKE	XXDDRQKE	XXDDRQKE	XXDDRQKE		XXDDRQKE				XXDDRQKE
--------
TDP076	DDRQKEYSWMNLIQ	1-1-1-1-0-1-1-1-1-1-1-1-1-1-1-1-1-1-1-1-1-1-1-1-1-1-1-1-1-1-1-1-1-1-1-1-1-1-1-1-0-1-1-0-1-1-1-1-1-1-1-0	3 times in 3 NECs		32.6	30	0
TDP076	dd^RQKEYSWMNLIQ	0-0-0-0-0-1-1-1-0-0-0-1-1-0-1-0-0-0-0-1-0-0-0-0-0-0-0-0-0-0-0-1-1-1-1-0-1-0-0-0-1-0-0-0-0-0-0-0-0-0-0-0	2 times in 3 NECs		27.9	22.6	0
TDP076	d^DRQKEYSWMNLIQ	0-0-1-0-0-0-1-0-0-0-0-0-1-0-0-0-1-0-1-1-1-1-0-0-0-0-0-1-1-1-0-0-0-1-0-1-0-1-0-0-0-0-0-0-1-0-0-0-1-1-0-0	1 times in 3 NECs		25.4	23.6	0
TDP076	DDRQKEYSWMNL^iq	0-1-1-1-1-0-0-0-0-1-0-0-0-1-0-0-0-0-0-0-0-0-0-0-0-0-0-0-0-0-0-0-0-0-0-0-0-0-0-0-0-0-0-0-0-0-1-0-1-1-1-0			22.6	0	0
TDP076	DDRQKEYSWM^nliq	0-0-0-0-0-0-0-0-0-0-0-0-0-0-0-0-0-0-0-0-0-0-0-0-0-0-0-0-0-0-0-0-0-0-0-0-0-0-0-0-0-1-1-0-0-0-1-1-1-0-1-1			16.6	0	0
TDP076	DDRQKEYSWMN^liq	0-0-0-1-0-0-0-0-0-1-0-0-0-1-0-0-0-0-0-0-0-0-0-0-0-0-0-0-0-0-0-0-0-0-0-0-0-0-0-0-0-0-1-0-0-0-1-1-0-1-0-1			19.5	0	0
TDP076	DDRQKEYSW^mnliq	0-0-0-0-1-0-0-0-0-0-0-0-0-0-0-0-0-0-0-0-0-0-0-0-0-0-0-0-0-0-0-0-0-0-0-0-0-0-0-0-0-0-0-0-0-0-0-1-0-0-0-0			16.7	0	0
TDP077	XXXRDLVD	0-0-0-0-0-0-0-0-0-0-0-0-0-0-0-0-0-0-0-0-0-1-0-0-0-0-0-0-0-0-0-0-0-0-0-0-0-0-0-0-0-1-1-4-0-1-1-3-0-0-0-0			32.6	0	0																							XXXRDLVD
TDP077	HIGPTAAY	0-0-0-0-0-0-0-0-0-0-0-0-0-0-0-0-0-0-0-0-0-0-0-0-0-0-0-0-0-1-0-0-0-0-0-0-0-0-0-0-0-1-1-4-0-0-1-2-0-1-1-2			28.9	0	0																															HIGPTAAY
TDP077	IGPTAAYH	0-0-0-0-0-0-0-0-0-0-0-0-0-1-0-0-0-0-0-0-0-0-0-0-0-0-0-0-0-0-0-0-0-0-0-0-0-0-0-0-1-1-2-3-0-1-1-3-1-1-2-2			32.1	0	0															IGPTAAYH																											IGPTAAYH
TDP077	PTAAYHXX	0-0-0-0-1-0-0-0-1-0-0-1-1-1-0-0-0-1-0-0-0-0-0-0-0-0-0-0-0-0-0-0-0-0-0-0-0-0-0-1-1-1-1-3-1-1-2-2-1-1-2-1			33.6	0	0						PTAAYHXX				PTAAYHXX			PTAAYHXX	PTAAYHXX	PTAAYHXX				PTAAYHXX																						PTAAYHXX	PTAAYHXX
TDP077	DLVDHIGP	1-1-1-1-1-1-0-1-1-1-1-1-1-1-1-1-1-1-0-0-0-0-0-0-0-0-0-0-0-0-1-1-1-1-0-0-0-1-1-1-1-1-1-1-0-0-1-1-1-1-1-1	3 times in 3 NECs		30.9	25.5	0		DLVDHIGP	DLVDHIGP	DLVDHIGP	DLVDHIGP	DLVDHIGP	DLVDHIGP		DLVDHIGP	DLVDHIGP	DLVDHIGP	DLVDHIGP	DLVDHIGP	DLVDHIGP	DLVDHIGP	DLVDHIGP	DLVDHIGP	DLVDHIGP	DLVDHIGP													DLVDHIGP	DLVDHIGP	DLVDHIGP	DLVDHIGP				DLVDHIGP	DLVDHIGP	DLVDHIGP	DLVDHIGP
TDP077	LVDHIGPT	0-0-0-0-0-0-0-0-0-0-0-0-0-0-0-0-0-0-0-0-0-0-0-0-0-0-0-0-0-0-0-0-0-0-0-0-0-0-0-0-0-1-1-1-0-0-1-1-0-0-0-1			31.1	0	0
TDP077	XXRDLVDH	1-1-1-0-0-1-1-1-0-0-1-1-1-0-1-1-1-1-1-1-1-0-1-0-0-0-0-1-1-1-1-1-1-1-1-1-1-1-1-1-1-0-2-4-1-0-2-3-1-1-3-3	3 times in 3 NECs		38	38.5	0		XXRDLVDH	XXRDLVDH	XXRDLVDH			XXRDLVDH	XXRDLVDH	XXRDLVDH			XXRDLVDH	XXRDLVDH	XXRDLVDH		XXRDLVDH	XXRDLVDH	XXRDLVDH	XXRDLVDH	XXRDLVDH	XXRDLVDH	XXRDLVDH		XXRDLVDH					XXRDLVDH	XXRDLVDH	XXRDLVDH	XXRDLVDH	XXRDLVDH	XXRDLVDH	XXRDLVDH	XXRDLVDH	XXRDLVDH	XXRDLVDH	XXRDLVDH	XXRDLVDH	XXRDLVDH	XXRDLVDH
TDP077	GPTAAYHX	0-0-0-0-0-0-0-0-0-0-0-0-0-1-0-0-0-0-0-0-0-0-0-0-0-0-0-0-0-0-0-0-0-0-0-0-0-0-0-0-0-1-1-2-0-0-1-2-0-1-1-1			33.4	0	0															GPTAAYHX
TDP077	VDHIGPTA	0-0-0-0-0-0-0-0-0-0-0-0-0-0-0-0-0-0-0-0-0-0-0-0-0-0-0-0-0-0-0-0-0-0-0-0-0-0-0-0-0-0-0-1-0-0-0-0-0-0-0-0			15.2	0	0
TDP077	TAAYHXXX	0-0-0-0-0-0-0-0-0-0-0-1-1-1-0-0-0-0-0-0-0-0-0-0-0-0-0-0-0-0-0-0-0-0-0-0-0-0-0-0-0-1-1-1-1-1-1-1-0-0-0-0			34.2	0	0													TAAYHXXX	TAAYHXXX	TAAYHXXX
TDP077	XRDLVDHI	0-0-0-0-0-0-0-0-0-0-0-0-0-0-0-0-0-0-0-0-0-0-0-0-0-0-0-0-0-1-0-1-0-0-0-0-0-0-0-1-1-1-1-2-0-0-1-1-1-1-1-1			26.7	0	0																															XRDLVDHI		XRDLVDHI								XRDLVDHI	XRDLVDHI
--------
TDP077	RDLVDHIGPTAAYH	1-1-1-1-1-1-1-1-1-1-1-1-1-1-1-1-1-1-1-1-1-1-1-1-1-1-1-1-1-1-1-1-1-1-1-1-1-1-1-1-1-1-1-1-1-1-1-1-1-1-1-1	3 times in 3 NECs		49.2	43.2	0
TDP077	rd^LVDHIGPTAAYH	1-1-1-0-0-1-1-1-0-0-1-1-1-0-1-1-1-1-1-1-1-0-1-0-0-0-0-1-1-1-1-1-1-1-1-1-1-1-1-1-1-0-1-0-1-0-1-0-1-1-1-1	3 times in 3 NECs		38	38.5	0
TDP077	r^DLVDHIGPTAAYH	0-0-0-0-0-0-0-0-0-0-0-0-0-0-0-0-0-0-0-0-0-1-0-0-0-0-0-0-0-0-0-0-0-0-0-0-0-0-0-0-0-1-1-1-0-1-1-1-0-0-0-0			32.6	0	0
TDP077	RDLVDHIGPTAAY^h	0-0-0-0-0-0-0-0-0-0-0-1-1-1-0-0-0-0-0-0-0-0-0-0-0-0-0-0-0-0-0-0-0-0-0-0-0-0-0-0-0-1-1-1-1-1-1-1-0-0-0-0			34.2	0	0
TDP077	rdlvd^HIGPTAAYH	1-1-1-1-1-1-0-1-1-1-1-1-1-1-1-1-1-1-0-0-0-0-0-0-0-0-0-0-0-0-1-1-1-1-0-0-0-1-1-1-1-1-1-1-0-0-1-1-1-1-1-1	3 times in 3 NECs		30.9	25.5	0
TDP077	rdl^VDHIGPTAAYH	0-0-0-0-0-0-0-0-0-0-0-0-0-0-0-0-0-0-0-0-0-0-0-0-0-0-0-0-0-1-0-1-0-0-0-0-0-0-0-1-1-1-1-1-0-0-1-1-1-1-1-1			26.7	0	0
TDP077	RDLVDHIGPTAA^yh	0-0-0-0-1-0-0-0-1-0-0-1-1-1-0-0-0-1-0-0-0-0-0-0-0-0-0-0-0-0-0-0-0-0-0-0-0-0-0-1-1-1-1-1-1-1-1-1-1-1-1-1			33.6	0	0
TDP077	rdlvdh^IGPTAAYH	0-0-0-0-0-0-0-0-0-0-0-0-0-0-0-0-0-0-0-0-0-0-0-0-0-0-0-0-0-0-0-0-0-0-0-0-0-0-0-0-0-1-1-1-0-0-1-1-0-0-0-1			31.1	0	0
TDP077	RDLVDHIGPT^aayh	0-0-0-0-0-0-0-0-0-0-0-0-0-1-0-0-0-0-0-0-0-0-0-0-0-0-0-0-0-0-0-0-0-0-0-0-0-0-0-0-1-1-1-1-0-1-1-1-1-1-1-1			32.1	0	0
TDP077	r^DLVDHIGPTAA^yh	0-0-0-0-0-0-0-0-0-0-0-0-0-0-0-0-0-0-0-0-0-0-0-0-0-0-0-0-0-0-0-0-0-0-0-0-0-0-0-0-0-0-0-1-0-0-0-1-0-0-0-0			24.7	0	0
TDP077	RDLVDHIGPTA^ayh	0-0-0-0-0-0-0-0-0-0-0-0-0-1-0-0-0-0-0-0-0-0-0-0-0-0-0-0-0-0-0-0-0-0-0-0-0-0-0-0-0-1-1-1-0-0-1-1-0-1-1-1			33.4	0	0
TDP077	rd^LVDHIGPTAA^yh	0-0-0-0-0-0-0-0-0-0-0-0-0-0-0-0-0-0-0-0-0-0-0-0-0-0-0-0-0-0-0-0-0-0-0-0-0-0-0-0-0-0-0-1-0-0-1-0-0-0-1-0			21.2	0	0
TDP077	RDLVDHIGP^taayh	0-0-0-0-0-0-0-0-0-0-0-0-0-0-0-0-0-0-0-0-0-0-0-0-0-0-0-0-0-1-0-0-0-0-0-0-0-0-0-0-0-1-1-1-0-0-1-1-0-1-1-1			28.9	0	0
TDP077	rd^LVDHIGPT^aayh	0-0-0-0-0-0-0-0-0-0-0-0-0-0-0-0-0-0-0-0-0-0-0-0-0-0-0-0-0-0-0-0-0-0-0-0-0-0-0-0-0-0-1-1-0-0-0-1-0-0-1-1			24.5	0	0
TDP077	r^DLVDHIGPT^aayh	0-0-0-0-0-0-0-0-0-0-0-0-0-0-0-0-0-0-0-0-0-0-0-0-0-0-0-0-0-0-0-0-0-0-0-0-0-0-0-0-0-0-0-1-0-0-0-1-0-0-0-0			22.6	0	0
TDP077	rd^LVDHIGPTA^ayh	0-0-0-0-0-0-0-0-0-0-0-0-0-0-0-0-0-0-0-0-0-0-0-0-0-0-0-0-0-0-0-0-0-0-0-0-0-0-0-0-0-0-0-1-0-0-0-1-0-0-0-0			25.4	0	0
TDP077	r^DLVDHIGP^taayh	0-0-0-0-0-0-0-0-0-0-0-0-0-0-0-0-0-0-0-0-0-0-0-0-0-0-0-0-0-0-0-0-0-0-0-0-0-0-0-0-0-0-0-1-0-0-0-0-0-0-0-0			18.3	0	0
TDP077	RDLVDHI^gptaayh	0-0-0-0-0-0-0-0-0-0-0-0-0-0-0-0-0-0-0-0-0-0-0-0-0-0-0-0-0-0-0-0-0-0-0-0-0-0-0-0-0-0-0-1-0-0-0-0-0-0-0-0			15.2	0	0
TDP077	rd^LVDHIGP^taayh	0-0-0-0-0-0-0-0-0-0-0-0-0-0-0-0-0-0-0-0-0-0-0-0-0-0-0-0-0-0-0-0-0-0-0-0-0-0-0-0-0-0-0-1-0-0-0-1-0-0-0-1			17.8	0	0
TDP077	rdl^VDHIGP^taayh	0-0-0-0-0-0-0-0-0-0-0-0-0-0-0-0-0-0-0-0-0-0-0-0-0-0-0-0-0-0-0-0-0-0-0-0-0-0-0-0-0-0-0-1-0-0-0-0-0-0-0-0			15.3	0	0
TDP079	HTFQESML	0-0-0-0-0-0-0-0-0-0-0-0-0-0-0-0-0-0-0-0-0-0-0-0-0-0-0-0-0-0-0-0-0-0-0-0-0-0-0-0-0-0-0-1-0-0-1-1-0-0-1-1			23.7	0	0
TDP079	XGHTFQES	0-0-0-0-0-0-0-0-0-0-0-0-0-0-0-0-0-0-0-0-0-0-0-0-0-0-0-0-0-0-0-0-0-0-0-0-0-0-0-0-0-0-1-1-0-0-0-1-1-1-1-1			27.4	0	0
TDP079	QESMLDIP	0-0-0-0-1-0-0-0-0-0-0-0-0-0-0-0-0-0-0-0-0-0-0-0-0-0-0-0-0-0-0-0-0-0-0-0-0-0-0-0-0-0-0-0-0-0-0-1-0-0-0-0			15.6	0	0						QESMLDIP
TDP079	ESMLDIPK	0-0-0-0-0-0-0-0-0-0-0-0-0-0-0-0-0-0-0-0-0-0-0-0-0-0-0-0-0-0-0-0-0-0-0-0-0-0-0-0-0-1-1-1-0-1-1-1-0-1-1-1			17.8	0	0
TDP079	SMLDIPKQ	0-0-0-0-0-1-0-0-0-0-0-0-0-0-0-0-0-0-0-0-0-0-0-0-0-0-0-0-0-0-0-1-1-1-1-0-1-0-1-1-0-0-0-0-0-0-0-1-0-0-0-1	2 times in 3 NECs		18.1	16.3	0							SMLDIPKQ																										SMLDIPKQ	SMLDIPKQ	SMLDIPKQ	SMLDIPKQ		SMLDIPKQ		SMLDIPKQ	SMLDIPKQ
TDP079	LDIPKQXX	0-0-0-0-0-0-0-0-0-0-0-0-0-0-0-0-0-0-0-0-0-0-0-0-0-0-0-0-0-0-0-0-0-0-0-0-0-0-0-0-0-0-0-0-0-0-1-1-0-0-0-0			20.7	0	0
TDP079	DIPKQXXX	0-0-0-0-1-1-0-0-0-0-1-0-0-1-0-0-0-0-0-0-0-0-0-0-0-0-0-0-0-0-0-0-0-0-0-0-0-0-0-0-0-0-1-0-0-0-1-1-0-0-0-0			29.1	0	0						DIPKQXXX	DIPKQXXX					DIPKQXXX			DIPKQXXX
TDP079	XXXGHTFQ	0-0-0-0-0-0-0-0-0-0-0-0-0-0-0-0-0-0-0-0-0-0-0-0-0-0-0-0-0-0-0-0-0-0-0-0-0-0-0-0-0-0-1-1-0-0-1-1-0-0-0-0			28.9	0	0
TDP079	FQESMLDI	0-0-0-1-1-0-0-0-0-0-0-0-0-0-0-0-0-0-0-0-0-0-0-0-0-0-0-0-0-0-0-0-0-0-0-0-0-0-0-0-0-1-1-1-0-1-1-1-0-1-1-1			16.9	0	0					FQESMLDI	FQESMLDI
TDP079	GHTFQESM	0-0-0-0-0-0-0-0-0-0-0-0-0-0-0-0-0-0-0-0-0-0-0-0-0-0-0-0-0-0-0-0-0-0-0-0-0-0-0-0-0-1-1-2-0-0-0-1-0-0-1-1			27.4	0	0
TDP079	TFQESMLD	0-0-0-0-1-0-0-0-0-0-0-0-0-0-0-0-0-0-0-0-0-0-0-0-0-0-0-0-0-0-0-0-0-0-0-0-0-0-0-0-0-0-1-1-1-1-1-1-1-1-1-1			20.6	0	0						TFQESMLD
TDP079	XXGHTFQE	0-1-1-1-1-1-1-1-0-0-1-1-1-1-1-1-1-1-1-1-1-1-0-1-0-0-1-1-1-1-1-1-0-0-1-0-0-1-1-1-1-1-0-1-1-1-1-0-1-1-1-1	3 times in 3 NECs		35	30.9	0			XXGHTFQE	XXGHTFQE	XXGHTFQE	XXGHTFQE	XXGHTFQE	XXGHTFQE	XXGHTFQE			XXGHTFQE	XXGHTFQE	XXGHTFQE	XXGHTFQE	XXGHTFQE	XXGHTFQE	XXGHTFQE	XXGHTFQE	XXGHTFQE	XXGHTFQE	XXGHTFQE	XXGHTFQE		XXGHTFQE			XXGHTFQE	XXGHTFQE	XXGHTFQE	XXGHTFQE	XXGHTFQE	XXGHTFQE			XXGHTFQE			XXGHTFQE	XXGHTFQE	XXGHTFQE	XXGHTFQE
--------
TDP079	gh^TFQESMLDIPKQ	0-1-1-1-1-1-1-1-0-0-1-1-1-1-1-1-1-1-1-1-1-1-0-1-0-0-1-1-1-1-1-1-0-0-1-0-0-1-1-1-1-1-0-1-1-1-1-0-1-1-1-1	3 times in 3 NECs		35	30.9	0
TDP079	GHTFQESMLDIPKQ	1-1-1-1-1-1-1-1-1-1-1-1-1-1-1-1-1-1-1-1-1-1-1-1-1-1-1-1-1-1-1-1-1-1-1-1-1-1-1-1-1-1-1-1-1-1-1-1-1-1-1-1	3 times in 3 NECs		40.6	33.8	0
TDP079	GHTFQESMLDIPK^q	0-0-0-0-1-1-0-0-0-0-1-0-0-1-0-0-0-0-0-0-0-0-0-0-0-0-0-0-0-0-0-0-0-0-0-0-0-0-0-0-0-0-1-0-0-0-1-1-0-0-0-0			29.1	0	0
TDP079	ght^FQESMLDIPKQ	0-0-0-0-0-0-0-0-0-0-0-0-0-0-0-0-0-0-0-0-0-0-0-0-0-0-0-0-0-0-0-0-0-0-0-0-0-0-0-0-0-0-1-1-0-0-0-1-1-1-1-1			27.4	0	0
TDP079	ghtf^QESMLDIPKQ	0-0-0-0-0-0-0-0-0-0-0-0-0-0-0-0-0-0-0-0-0-0-0-0-0-0-0-0-0-0-0-0-0-0-0-0-0-0-0-0-0-1-1-2-0-0-0-1-0-0-1-1			27.4	0	0
TDP079	g^HTFQESMLDIPKQ	0-0-0-0-0-0-0-0-0-0-0-0-0-0-0-0-0-0-0-0-0-0-0-0-0-0-0-0-0-0-0-0-0-0-0-0-0-0-0-0-0-0-1-1-0-0-1-1-0-0-0-0			28.9	0	0
TDP079	ghtfq^ESMLDIPKQ	0-0-0-0-0-0-0-0-0-0-0-0-0-0-0-0-0-0-0-0-0-0-0-0-0-0-0-0-0-0-0-0-0-0-0-0-0-0-0-0-0-0-0-1-0-0-1-1-0-0-1-1			23.7	0	0
TDP079	GHTFQESMLDIP^kq	0-0-0-0-0-0-0-0-0-0-0-0-0-0-0-0-0-0-0-0-0-0-0-0-0-0-0-0-0-0-0-0-0-0-0-0-0-0-0-0-0-0-0-0-0-0-1-1-0-0-0-0			20.7	0	0
TDP079	ghtfqe^SMLDIPKQ	0-0-0-0-1-0-0-0-0-0-0-0-0-0-0-0-0-0-0-0-0-0-0-0-0-0-0-0-0-0-0-0-0-0-0-0-0-0-0-0-0-0-1-1-1-1-1-1-1-1-1-1			20.6	0	0
TDP079	GHTFQESMLD^ipkq	0-0-0-0-0-1-0-0-0-0-0-0-0-0-0-0-0-0-0-0-0-0-0-0-0-0-0-0-0-0-0-1-1-1-1-0-1-0-1-1-0-0-0-0-0-0-0-1-0-0-0-1	2 times in 3 NECs		18.1	16.3	0
TDP079	ghtfqes^MLDIPKQ	0-0-0-1-1-0-0-0-0-0-0-0-0-0-0-0-0-0-0-0-0-0-0-0-0-0-0-0-0-0-0-0-0-0-0-0-0-0-0-0-0-1-1-1-0-1-1-1-0-1-1-1			16.9	0	0
TDP079	GHTFQESM^ldipkq	0-0-0-0-1-0-0-0-0-0-0-0-0-0-0-0-0-0-0-0-0-0-0-0-0-0-0-0-0-0-0-0-0-0-0-0-0-0-0-0-0-0-0-0-0-0-0-1-0-0-0-0			15.6	0	0
TDP079	GHTFQESML^dipkq	0-0-0-0-0-0-0-0-0-0-0-0-0-0-0-0-0-0-0-0-0-0-0-0-0-0-0-0-0-0-0-0-0-0-0-0-0-0-0-0-0-1-1-1-0-1-1-1-0-1-1-1			17.8	0	0
TDP080	NITREWLH	0-0-0-0-0-0-0-0-0-0-0-0-0-0-0-0-0-0-0-0-0-0-0-0-0-0-0-0-0-0-0-0-0-0-0-0-0-0-0-0-1-1-0-0-0-0-1-0-1-1-1-1			22	0	0																																										NITREWLH
TDP080	REWLHPFK	0-0-0-0-0-0-0-0-0-0-0-0-0-0-0-0-0-0-0-0-0-0-0-0-0-0-0-0-0-0-0-0-0-0-0-0-0-0-0-0-1-1-1-0-0-1-2-1-0-1-1-0			24.9	0	0																																										REWLHPFK
TDP080	XXPNITRE	0-0-0-0-0-0-0-0-0-0-0-0-0-0-0-0-0-0-0-0-0-0-0-0-0-0-0-0-0-0-0-0-0-0-0-0-0-0-0-0-0-0-0-0-0-0-1-0-0-0-0-0			24	0	0
TDP080	TREWLHPF	1-1-0-1-1-1-1-1-1-1-1-1-1-0-1-1-1-0-1-1-1-1-0-0-0-0-1-1-1-1-1-1-1-1-1-1-0-1-1-1-1-2-1-0-1-2-2-1-1-2-2-0	3 times in 3 NECs		22.8	21.5	0		TREWLHPF	TREWLHPF		TREWLHPF	TREWLHPF	TREWLHPF	TREWLHPF	TREWLHPF	TREWLHPF	TREWLHPF	TREWLHPF	TREWLHPF	TREWLHPF		TREWLHPF	TREWLHPF	TREWLHPF		TREWLHPF	TREWLHPF	TREWLHPF	TREWLHPF					TREWLHPF	TREWLHPF	TREWLHPF	TREWLHPF	TREWLHPF	TREWLHPF	TREWLHPF	TREWLHPF	TREWLHPF	TREWLHPF		TREWLHPF	TREWLHPF	TREWLHPF	TREWLHPF
TDP080	WLHPFKVH	0-0-0-0-0-0-0-0-0-0-0-0-0-0-0-0-0-0-0-0-0-0-0-0-0-0-0-0-0-0-0-0-0-0-0-0-0-0-0-0-0-0-0-0-0-0-1-0-0-0-1-0			22.7	0	0
TDP080	LHPFKVHX	0-0-0-0-0-0-0-0-0-0-0-0-0-0-0-0-0-0-0-0-0-0-0-0-0-0-0-0-0-0-0-0-0-0-0-0-0-0-0-0-0-2-1-0-0-1-1-0-1-2-2-1			31.5	0	0
TDP080	HPFKVHXX	0-0-0-0-0-0-0-0-0-1-0-0-0-1-0-0-0-0-0-0-0-0-0-0-0-0-0-0-0-0-0-0-0-0-0-0-0-0-0-0-1-1-1-0-0-1-1-0-0-1-0-0			19.6	0	0											HPFKVHXX				HPFKVHXX																											HPFKVHXX
TDP080	PNITREWL	0-0-0-0-0-0-0-0-0-0-0-0-0-0-0-0-0-0-0-0-0-0-0-0-0-0-0-0-0-0-0-0-0-0-0-0-0-0-0-0-1-2-1-0-0-1-1-0-1-2-1-1			27.1	0	0																																										PNITREWL
--------
TDP080	pnitrew^LHPFKVH	1-1-0-1-1-1-1-1-1-1-1-1-1-0-1-1-1-0-1-1-1-1-0-0-0-0-1-1-1-1-1-1-1-1-1-1-0-1-1-1-1-1-0-0-1-1-1-1-1-1-1-0	3 times in 3 NECs		22.8	21.5	0
TDP080	PNITREWLHPFKVH	1-1-1-1-1-1-1-0-1-1-1-1-1-1-1-1-1-1-1-1-1-0-1-1-1-0-1-1-1-1-1-1-1-0-1-1-1-1-1-1-1-0-0-0-1-1-1-0-1-1-0-0	3 times in 3 NECs		37	33.6	0
TDP080	pnit^REWLHPFKVH	0-0-0-0-0-0-0-0-0-0-0-0-0-0-0-0-0-0-0-0-0-0-0-0-0-0-0-0-0-0-0-0-0-0-0-0-0-0-0-0-1-1-0-0-0-1-1-0-1-1-0-0			27.1	0	0
TDP080	pnitr^EWLHPFKVH	0-0-0-0-0-0-0-0-0-0-0-0-0-0-0-0-0-0-0-0-0-0-0-0-0-0-0-0-0-0-0-0-0-0-0-0-0-0-0-0-1-1-0-0-0-0-1-0-1-1-1-0			22	0	0
TDP080	PNITREWLHPF^kvh	0-0-0-0-0-0-0-0-0-0-0-0-0-0-0-0-0-0-0-0-0-0-0-0-0-0-0-0-0-0-0-0-0-0-0-0-0-0-0-0-0-1-0-0-0-1-1-0-1-1-1-0			31.5	0	0
TDP080	PNITREWL^hpfkvh	0-0-0-0-0-0-0-0-0-0-0-0-0-0-0-0-0-0-0-0-0-0-0-0-0-0-0-0-0-0-0-0-0-0-0-0-0-0-0-0-1-1-1-0-0-1-1-1-0-1-1-0			24.9	0	0
TDP080	pn^ITREWLHPFKVH	0-0-0-0-0-0-0-0-0-0-0-0-0-0-0-0-0-0-0-0-0-0-0-0-0-0-0-0-0-0-0-0-0-0-0-0-0-0-0-0-0-0-0-0-0-0-1-0-0-0-0-0			24	0	0
TDP080	PNITREWLHP^fkvh	0-0-0-0-0-0-0-0-0-0-0-0-0-0-0-0-0-0-0-0-0-0-0-0-0-0-0-0-0-0-0-0-0-0-0-0-0-0-0-0-0-0-0-0-0-0-1-0-0-0-1-0			22.7	0	0
TDP080	PNITREWLHPFK^vh	0-0-0-0-0-0-0-0-0-1-0-0-0-1-0-0-0-0-0-0-0-0-0-0-0-0-0-0-0-0-0-0-0-0-0-0-0-0-0-0-1-1-1-0-0-1-1-0-0-1-0-0			19.6	0	0
TDP080	pnitrewl^HPFKVH	0-0-0-0-0-0-0-0-0-0-0-0-0-0-0-0-0-0-0-0-0-0-0-0-0-0-0-0-0-0-0-0-0-0-0-0-0-0-0-0-0-0-0-0-0-0-1-0-0-0-0-0			18.2	0	0
TDP080	pnit^REWLHPF^kvh	0-0-0-0-0-0-0-0-0-0-0-0-0-0-0-0-0-0-0-0-0-0-0-0-0-0-0-0-0-0-0-0-0-0-0-0-0-0-0-0-0-1-1-0-0-0-0-0-0-1-1-1			17.6	0	0
TDP080	PNITREW^lhpfkvh	0-0-0-0-0-0-0-0-0-0-0-0-0-0-0-0-0-0-0-0-0-0-0-0-0-0-0-0-0-0-0-0-0-0-0-0-0-0-0-0-0-1-1-0-0-1-1-0-0-1-1-0			18.7	0	0
TDP080	PNITR^ewlhpfkvh	0-0-0-0-0-0-0-0-0-0-0-0-0-0-0-0-0-0-0-0-0-0-0-0-0-0-0-0-0-0-0-0-0-0-0-0-0-0-0-0-0-0-0-0-0-0-0-0-0-0-0-1			15	0	0
TDP081	XXWQKSND	0-0-0-0-0-0-0-0-0-0-0-0-0-0-0-0-0-0-0-0-0-0-0-0-0-0-0-0-0-0-0-0-0-0-0-0-0-0-0-0-0-1-1-0-0-0-0-0-0-1-1-1			24.7	0	0
TDP081	AQYMMGQX	0-0-0-0-0-0-0-0-0-0-0-0-0-0-0-0-0-0-0-0-0-0-0-0-0-0-0-0-0-0-0-0-0-0-0-0-0-0-0-0-0-0-0-0-0-0-0-0-1-0-1-2			16.5	0	0
TDP081	WQKSNDGA	0-0-0-0-0-0-0-0-0-0-0-0-0-0-0-0-0-0-0-0-0-0-0-0-0-0-0-0-0-0-0-0-0-0-0-0-0-0-0-0-0-0-0-0-0-0-1-1-0-0-1-1			15.6	0	0
TDP081	QYMMGQXX	0-0-0-0-0-0-1-0-0-0-0-1-0-0-0-0-0-0-0-0-0-0-0-0-0-0-0-0-0-0-0-0-0-0-0-0-0-0-0-0-0-0-0-0-0-0-0-0-0-0-1-0			17.2	0	0								QYMMGQXX					QYMMGQXX
TDP081	YMMGQXXX	0-0-0-0-0-0-0-0-1-0-0-0-0-0-0-0-0-0-0-0-0-0-0-0-0-0-0-0-0-0-0-0-0-0-0-0-0-0-0-0-0-0-0-0-0-0-0-0-1-0-0-0			15.7	0	0										YMMGQXXX
--------
TDP081	wq^KSNDGAQYMMGQ	0-0-0-0-0-0-0-0-0-0-0-0-0-0-0-0-0-0-0-0-0-0-0-0-0-0-0-0-0-0-0-0-0-0-0-0-0-0-0-0-0-1-1-0-0-0-0-0-0-1-1-0			24.7	0	0
TDP081	WQKSNDGAQYMM^gq	0-0-0-0-0-0-1-0-0-0-0-1-0-0-0-0-0-0-0-0-0-0-0-0-0-0-0-0-0-0-0-0-0-0-0-0-0-0-0-0-0-0-0-0-0-0-0-0-0-0-1-0			17.2	0	0
TDP081	WQKSNDGAQYMMGQ	1-1-1-1-1-1-1-1-1-0-1-1-1-1-1-1-1-1-1-1-1-1-1-1-1-1-1-1-1-1-1-1-1-1-0-1-1-1-1-1-1-1-1-0-1-1-1-0-1-1-1-0	3 times in 3 NECs		22.6	18	0
TDP081	wqks^NDGAQYMMGQ	0-0-0-0-0-0-0-0-0-0-0-0-0-0-0-0-0-0-0-0-0-0-0-0-0-0-0-0-0-0-0-0-0-0-0-0-0-0-0-0-0-0-0-0-0-0-1-1-0-0-1-1			15.6	0	0
TDP081	WQKSNDGAQYM^mgq	0-0-0-0-0-0-0-0-0-0-0-0-0-0-0-0-0-0-0-0-0-0-0-0-0-0-0-0-0-0-0-0-0-0-0-0-0-0-0-0-0-0-0-0-0-0-0-0-1-0-1-1			16.5	0	0
TDP081	WQKSNDGAQYMMG^q	0-0-0-0-0-0-0-0-1-0-0-0-0-0-0-0-0-0-0-0-0-0-0-0-0-0-0-0-0-0-0-0-0-0-0-0-0-0-0-0-0-0-0-0-0-0-0-0-1-0-0-0			15.7	0	0
TDP081	wq^KSNDGAQYM^mgq	0-0-0-0-0-0-0-0-0-0-0-0-0-0-0-0-0-0-0-0-0-0-0-0-0-0-0-0-0-0-0-0-0-0-0-0-0-0-0-0-0-0-0-0-0-0-0-0-0-0-0-1			15.1	0	0
TDP082	MDPRYNHT	0-0-0-0-0-0-0-0-0-0-0-0-0-0-0-0-0-0-0-0-0-0-0-0-0-0-0-0-0-0-0-0-0-0-0-0-0-0-0-0-0-0-0-1-0-0-0-0-0-0-0-1			20.8	0	0
TDP082	DPRYNHTQ	0-0-0-0-0-0-0-0-0-0-0-0-0-0-0-0-0-0-0-0-0-0-0-0-0-0-0-0-0-0-0-0-0-0-0-0-0-0-0-0-0-0-1-1-0-0-0-1-0-0-1-1			18.1	0	0
TDP082	PRYNHTQQ	0-0-0-0-0-0-0-0-0-0-0-0-0-0-0-0-1-0-0-0-0-0-0-0-0-0-0-0-0-0-0-0-0-0-0-0-0-0-0-0-0-0-0-0-0-0-0-1-0-0-0-0			16.7	0	0																		PRYNHTQQ
TDP082	RYNHTQQF	0-0-0-0-0-0-0-1-0-0-0-0-0-0-0-0-0-0-0-0-0-0-0-0-0-0-0-0-0-0-0-0-1-0-0-0-0-0-0-1-0-1-0-1-0-1-1-1-0-0-1-1			24.8	0	0									RYNHTQQF																									RYNHTQQF							RYNHTQQF
TDP082	NHTQQFPX	0-0-0-0-0-0-0-0-0-0-0-0-0-0-0-0-0-0-0-0-0-0-0-0-0-0-0-0-0-0-0-0-0-0-0-0-0-0-0-0-0-0-0-0-0-0-0-0-0-0-0-1			17.1	0	0
TDP082	XXIQMDPR	0-0-0-0-0-0-0-0-0-0-0-0-0-0-0-0-0-0-0-0-0-0-0-0-0-0-0-0-0-0-0-0-0-0-0-0-0-0-0-0-0-0-0-1-0-0-0-0-0-0-0-0			15.1	0	0
TDP082	IQMDPRYN	1-1-1-1-1-1-1-1-1-1-1-1-1-1-1-1-1-1-1-1-1-1-1-1-1-1-1-1-1-1-1-1-1-1-1-1-1-1-1-1-1-1-0-0-1-1-1-0-1-1-1-0	3 times in 3 NECs		25.9	24.9	0		IQMDPRYN	IQMDPRYN	IQMDPRYN	IQMDPRYN	IQMDPRYN	IQMDPRYN	IQMDPRYN	IQMDPRYN	IQMDPRYN	IQMDPRYN	IQMDPRYN	IQMDPRYN	IQMDPRYN	IQMDPRYN	IQMDPRYN	IQMDPRYN	IQMDPRYN	IQMDPRYN	IQMDPRYN	IQMDPRYN	IQMDPRYN	IQMDPRYN	IQMDPRYN	IQMDPRYN	IQMDPRYN	IQMDPRYN	IQMDPRYN	IQMDPRYN	IQMDPRYN	IQMDPRYN	IQMDPRYN	IQMDPRYN	IQMDPRYN	IQMDPRYN	IQMDPRYN	IQMDPRYN	IQMDPRYN	IQMDPRYN	IQMDPRYN	IQMDPRYN	IQMDPRYN
TDP082	QMDPRYNH	0-0-0-0-0-0-0-0-0-0-0-0-0-0-0-0-0-0-0-0-0-0-0-0-0-0-0-0-0-0-0-0-0-0-0-0-0-0-0-0-0-0-0-0-0-0-0-1-0-0-1-0			19.1	0	0
--------
TDP082	IQMDPRYNH^tqqfp	0-0-0-0-0-0-0-1-0-0-0-0-0-0-0-0-0-0-0-0-0-0-0-0-0-0-0-0-0-0-0-0-1-0-0-0-0-0-0-1-0-1-0-0-0-1-1-1-0-0-1-1			24.8	0	0
TDP082	IQMDPRYNHTQQFP	1-1-0-1-0-1-1-1-1-0-1-1-0-1-1-1-1-1-1-1-1-1-0-0-0-0-1-1-1-1-0-1-1-0-1-0-1-0-0-0-1-1-1-0-1-1-1-0-1-1-1-0	1 times in 3 NECs		23.2	19.6	0
TDP082	iqmd^PRYNHTQQFP	1-1-1-1-1-1-1-1-1-1-1-1-1-1-1-1-1-1-1-1-1-1-1-1-1-1-1-1-1-1-1-1-1-1-1-1-1-1-1-1-1-1-0-0-1-1-1-0-1-1-1-0	3 times in 3 NECs		25.9	24.9	0
TDP082	iqmdp^RYNHTQQFP	0-0-0-0-0-0-0-0-0-0-0-0-0-0-0-0-0-0-0-0-0-0-0-0-0-0-0-0-0-0-0-0-0-0-0-0-0-0-0-0-0-0-0-0-0-0-0-1-0-0-1-0			19.1	0	0
TDP082	iq^MDPRYNH^tqqfp	0-0-0-0-0-0-0-0-0-0-0-0-0-0-0-0-0-0-0-0-0-0-0-0-0-0-0-0-0-0-0-0-0-0-0-0-0-0-0-0-0-0-0-1-0-0-0-0-0-0-0-0			15.1	0	0
TDP082	IQMDPR^ynhtqqfp	0-0-0-0-0-0-0-0-0-0-0-0-0-0-0-0-0-0-0-0-0-0-0-0-0-0-0-0-0-0-0-0-0-0-0-0-0-0-0-0-0-0-0-1-0-0-0-0-0-0-0-1			20.8	0	0
TDP082	IQMDPRY^nhtqqfp	0-0-0-0-0-0-0-0-0-0-0-0-0-0-0-0-0-0-0-0-0-0-0-0-0-0-0-0-0-0-0-0-0-0-0-0-0-0-0-0-0-0-1-1-0-0-0-1-0-0-1-1			18.1	0	0
TDP082	IQMDPRYN^htqqfp	0-0-0-0-0-0-0-0-0-0-0-0-0-0-0-0-1-0-0-0-0-0-0-0-0-0-0-0-0-0-0-0-0-0-0-0-0-0-0-0-0-0-0-0-0-0-0-1-0-0-0-0			16.7	0	0
TDP082	IQMDPRYNHTQ^qfp	0-0-0-0-0-0-0-0-0-0-0-0-0-0-0-0-0-0-0-0-0-0-0-0-0-0-0-0-0-0-0-0-0-0-0-0-0-0-0-0-0-0-0-0-0-0-0-0-0-0-0-1			17.1	0	0
TDP083	PSLIAKWV	0-0-0-0-0-0-0-0-0-0-0-0-0-0-0-0-0-0-0-0-0-0-0-0-0-0-0-0-0-0-0-0-0-0-0-0-0-0-0-0-1-1-1-0-1-1-1-0-1-1-1-1			29.5	0	0																																										PSLIAKWV
TDP083	LIAKWVGF	0-0-0-1-2-0-0-0-0-1-0-0-2-2-0-0-2-2-0-0-0-0-0-0-0-0-0-0-0-0-0-0-0-0-0-0-0-0-0-0-2-2-2-1-1-2-3-3-2-2-2-2			28.7	0	0					LIAKWVGF	LIAKWVGF					LIAKWVGF			LIAKWVGF	LIAKWVGF			LIAKWVGF	LIAKWVGF																							LIAKWVGF
TDP083	IAKWVGFE	0-0-2-2-3-0-0-0-0-0-0-0-0-1-0-0-0-0-0-0-0-0-0-0-0-0-0-0-0-0-0-0-0-0-0-0-0-0-0-0-1-2-3-1-1-0-3-1-2-2-3-1			31.4	0	0				IAKWVGFE	IAKWVGFE	IAKWVGFE									IAKWVGFE																											IAKWVGFE
TDP083	AKWVGFEP	0-0-0-0-0-0-0-0-0-0-0-0-0-0-0-0-0-0-0-0-0-0-0-0-0-0-0-0-0-0-0-0-0-0-0-0-0-0-0-0-1-1-0-0-1-1-1-0-1-1-1-0			32.1	0	0																																										AKWVGFEP
TDP083	KWVGFEPH	0-0-0-1-1-0-0-0-1-1-0-0-0-0-0-0-0-0-0-0-0-0-0-0-0-0-0-0-0-0-0-0-0-0-0-0-0-0-0-0-1-1-0-0-1-1-1-0-1-1-0-0			29.4	0	0					KWVGFEPH	KWVGFEPH				KWVGFEPH	KWVGFEPH																															KWVGFEPH
TDP083	WVGFEPHX	0-0-0-0-0-0-0-0-0-0-0-0-0-0-0-0-0-0-0-0-0-0-0-0-0-0-0-0-0-0-0-0-0-0-0-0-0-0-0-0-0-0-0-0-0-0-1-0-0-1-0-0			30.3	0	0
TDP083	GFEPHXXX	0-0-0-0-0-0-0-0-0-0-0-0-0-0-0-0-0-1-0-0-0-0-0-0-0-0-0-0-0-0-0-0-0-0-0-0-0-0-0-0-0-0-0-0-0-0-1-0-1-1-1-0			23.4	0	0																			GFEPHXXX
TDP083	APSLIAKW	0-0-1-1-1-0-0-0-0-0-0-0-0-1-0-0-0-1-0-0-0-0-0-0-0-0-0-0-0-0-0-0-0-0-0-0-0-0-0-0-0-1-0-0-1-1-1-1-0-0-0-0			34.8	0	0				APSLIAKW	APSLIAKW	APSLIAKW									APSLIAKW				APSLIAKW
TDP083	SLIAKWVG	0-0-0-0-0-0-0-0-0-0-0-0-0-0-0-0-0-0-0-0-0-0-0-0-0-0-0-0-0-0-0-0-0-0-0-0-0-0-0-0-1-1-1-0-1-1-1-0-1-1-2-1			27.9	0	0																																										SLIAKWVG
TDP083	XAPSLIAK	0-0-0-0-0-0-0-0-0-0-0-0-0-0-0-0-0-0-0-0-0-0-0-0-0-0-0-0-0-0-0-0-0-0-0-0-0-0-0-0-0-1-0-0-0-0-1-0-1-0-1-0			19	0	0
TDP083	XXXAPSLI	1-1-1-1-1-1-1-1-1-1-1-1-0-1-0-1-1-1-1-1-1-1-1-0-1-1-1-1-1-1-0-0-1-1-1-1-1-0-1-1-1-0-1-0-1-1-2-1-1-2-1-0	3 times in 3 NECs		39.3	34.2	0		XXXAPSLI	XXXAPSLI	XXXAPSLI	XXXAPSLI	XXXAPSLI	XXXAPSLI	XXXAPSLI	XXXAPSLI	XXXAPSLI	XXXAPSLI	XXXAPSLI	XXXAPSLI		XXXAPSLI		XXXAPSLI	XXXAPSLI	XXXAPSLI	XXXAPSLI	XXXAPSLI	XXXAPSLI	XXXAPSLI	XXXAPSLI		XXXAPSLI	XXXAPSLI	XXXAPSLI	XXXAPSLI	XXXAPSLI	XXXAPSLI			XXXAPSLI	XXXAPSLI	XXXAPSLI	XXXAPSLI	XXXAPSLI		XXXAPSLI	XXXAPSLI	XXXAPSLI
TDP083	XXAPSLIA	0-0-0-0-0-1-0-1-0-0-1-1-0-1-0-0-1-0-0-0-0-1-0-0-0-0-0-0-0-1-0-1-0-0-0-0-0-0-0-0-1-1-0-0-0-1-2-0-1-1-1-0	1 times in 3 NECs		41.2	17.1	0							XXAPSLIA		XXAPSLIA			XXAPSLIA	XXAPSLIA		XXAPSLIA			XXAPSLIA					XXAPSLIA								XXAPSLIA		XXAPSLIA									XXAPSLIA
--------
TDP083	APSLIAKWVGFEPH	1-1-1-1-1-1-1-1-1-1-1-1-1-1-1-1-1-1-1-1-1-1-1-1-1-1-1-1-1-1-1-1-1-1-1-1-1-1-1-1-1-1-1-0-1-1-1-1-1-1-1-0	3 times in 3 NECs		50.1	40.9	0
TDP083	a^PSLIAKWVGFEPH	1-1-1-1-0-1-1-1-1-1-1-1-0-1-0-1-1-1-1-1-1-1-1-0-1-1-1-1-1-1-0-0-1-1-1-1-1-0-1-1-1-0-0-0-1-1-0-0-1-1-0-0	3 times in 3 NECs		39.3	34.2	0
TDP083	ap^SLIAKWVGFEPH	0-0-0-0-0-1-0-1-0-0-1-1-0-1-0-0-1-0-0-0-0-1-0-0-0-0-0-0-0-1-0-1-0-0-0-0-0-0-0-0-1-1-0-0-0-1-1-0-1-1-1-0	1 times in 3 NECs		41.2	17.1	0
TDP083	apsl^IAKWVGFEPH	0-0-1-1-1-0-0-0-0-0-0-0-0-1-0-0-0-1-0-0-0-0-0-0-0-0-0-0-0-0-0-0-0-0-0-0-0-0-0-0-0-1-0-0-1-1-1-1-0-0-0-0			34.8	0	0
TDP083	apsli^AKWVGFEPH	0-0-0-0-0-0-0-0-0-0-0-0-0-0-0-0-0-0-0-0-0-0-0-0-0-0-0-0-0-0-0-0-0-0-0-0-0-0-0-0-1-1-1-0-1-1-1-0-1-1-1-1			29.5	0	0
TDP083	APSLIAKWVGF^eph	0-0-0-0-0-0-0-0-0-0-0-0-0-0-0-0-0-0-0-0-0-0-0-0-0-0-0-0-0-0-0-0-0-0-0-0-0-0-0-0-0-0-0-0-0-0-0-0-0-1-0-0			30.3	0	0
TDP083	APSLIAKW^vgfeph	0-0-1-1-1-0-0-0-0-0-0-0-0-0-0-0-0-0-0-0-0-0-0-0-0-0-0-0-0-0-0-0-0-0-0-0-0-0-0-0-1-1-1-0-1-0-1-0-1-1-1-0			31.4	0	0
TDP083	APSLIAKWV^gfeph	0-0-0-0-0-0-0-0-0-0-0-0-0-0-0-0-0-0-0-0-0-0-0-0-0-0-0-0-0-0-0-0-0-0-0-0-0-0-0-0-1-1-0-0-1-1-1-0-1-1-1-0			32.1	0	0
TDP083	apslia^KWVGFEPH	0-0-0-0-0-0-0-0-0-0-0-0-0-0-0-0-0-0-0-0-0-0-0-0-0-0-0-0-0-0-0-0-0-0-0-0-0-0-0-0-1-1-1-0-1-1-1-0-1-1-1-1			27.9	0	0
TDP083	apsliakw^VGFEPH	0-0-1-1-1-0-0-0-0-0-0-0-0-1-0-0-0-0-0-0-0-0-0-0-0-0-0-0-0-0-0-0-0-0-0-0-0-0-0-0-0-1-1-1-0-0-1-1-1-0-1-1			18.5	0	0
TDP083	APSLIAKWVG^feph	0-0-0-1-1-0-0-0-1-1-0-0-0-0-0-0-0-0-0-0-0-0-0-0-0-0-0-0-0-0-0-0-0-0-0-0-0-0-0-0-1-1-0-0-1-1-1-0-1-1-0-0			29.4	0	0
TDP083	aps^LIAKWVGFEPH	0-0-0-0-0-0-0-0-0-0-0-0-0-0-0-0-0-0-0-0-0-0-0-0-0-0-0-0-0-0-0-0-0-0-0-0-0-0-0-0-0-1-0-0-0-0-1-0-1-0-1-0			19	0	0
TDP083	apsliak^WVGFEPH	0-0-0-0-1-0-0-0-0-0-0-0-1-1-0-0-1-1-0-0-0-0-0-0-0-0-0-0-0-0-0-0-0-0-0-0-0-0-0-0-1-1-1-1-1-1-1-1-1-1-1-1			24.4	0	0
TDP083	a^PSLIAKW^vgfeph	0-0-0-0-1-0-0-0-0-0-0-0-0-0-0-0-0-0-0-0-0-0-0-0-0-0-0-0-0-0-0-0-0-0-0-0-0-0-0-0-0-0-1-0-0-0-1-0-0-1-1-0			25.7	0	0
TDP083	APSLIAK^wvgfeph	0-0-0-1-1-0-0-0-0-1-0-0-1-1-0-0-1-1-0-0-0-0-0-0-0-0-0-0-0-0-0-0-0-0-0-0-0-0-0-0-1-1-1-0-0-1-1-1-1-1-1-1			28.7	0	0
TDP083	APSLIAKWVGFEP^h	0-0-0-0-0-0-0-0-0-0-0-0-0-0-0-0-0-1-0-0-0-0-0-0-0-0-0-0-0-0-0-0-0-0-0-0-0-0-0-0-0-0-0-0-0-0-1-0-1-1-0-0			23.4	0	0
TDP083	ap^SLIAKWVGF^eph	0-0-0-0-0-0-0-0-0-0-0-0-0-0-0-0-0-0-0-0-0-0-0-0-0-0-0-0-0-0-0-0-0-0-0-0-0-0-0-0-0-0-0-0-0-0-1-0-0-0-0-0			22	0	0
TDP083	apslia^KWVGFEP^h	0-0-0-0-0-0-0-0-0-0-0-0-0-0-0-0-0-0-0-0-0-0-0-0-0-0-0-0-0-0-0-0-0-0-0-0-0-0-0-0-0-0-0-0-0-0-0-0-0-0-1-0			16.6	0	0
TDP083	a^PSLIAK^wvgfeph	0-0-0-0-0-0-0-0-0-0-0-0-0-0-0-0-0-0-0-0-0-0-0-0-0-0-0-0-0-0-0-0-0-0-0-0-0-0-0-0-0-0-0-0-0-0-1-1-0-0-0-0			17.4	0	0
TDP084	XXPDFYLG	0-0-0-0-0-0-0-0-0-0-0-0-0-0-0-0-0-0-0-0-0-0-0-0-0-0-0-0-0-0-0-0-0-0-0-0-0-0-0-1-0-0-1-0-0-0-0-0-0-0-1-0	1 times in 3 NECs		20.7	16	0																																									XXPDFYLG
TDP084	SVPQWHEX	0-0-0-0-0-0-0-0-0-0-0-0-1-1-0-0-0-1-0-0-0-0-0-0-0-0-0-0-0-0-0-0-0-0-1-0-0-0-0-0-1-1-3-1-1-1-2-1-1-1-3-1			30.7	0	0														SVPQWHEX	SVPQWHEX				SVPQWHEX																	SVPQWHEX						SVPQWHEX
TDP084	DFYLGRSV	0-1-0-1-0-0-0-0-0-0-0-0-0-0-0-0-0-0-0-0-0-0-0-0-0-0-0-0-0-0-0-0-0-0-0-0-0-0-0-0-0-1-1-0-0-0-1-1-1-1-1-0			22.1	0	0			DFYLGRSV		DFYLGRSV
TDP084	PDFYLGRS	0-0-1-1-1-0-0-0-0-1-0-1-1-1-0-0-1-1-0-0-0-0-0-0-0-0-0-0-0-0-0-0-0-0-1-0-0-0-0-1-1-1-1-0-1-1-1-0-1-1-1-0			22.7	0	0				PDFYLGRS	PDFYLGRS	PDFYLGRS					PDFYLGRS		PDFYLGRS	PDFYLGRS	PDFYLGRS			PDFYLGRS	PDFYLGRS																	PDFYLGRS					PDFYLGRS	PDFYLGRS
TDP084	YLGRSVPQ	0-0-0-0-0-0-0-0-0-0-0-0-0-0-0-0-0-0-0-0-0-0-0-0-0-0-0-0-0-0-0-0-0-0-0-0-0-0-0-0-2-2-2-2-1-2-3-3-1-2-3-3			30.6	0	0																																										YLGRSVPQ
TDP084	LGRSVPQW	0-0-0-0-0-0-0-0-0-0-0-0-0-0-0-0-0-0-0-0-0-0-0-0-0-0-0-0-0-0-0-0-0-0-0-0-0-0-0-0-0-0-2-1-0-0-2-2-0-0-0-1			21.4	0	0
TDP084	RSVPQWHE	0-0-0-0-0-0-0-0-0-0-0-0-0-0-0-0-0-0-0-0-0-0-0-0-0-0-0-0-0-0-0-0-0-0-0-0-0-0-0-0-1-1-1-0-1-1-1-1-0-1-1-1			27.3	0	0																																										RSVPQWHE
TDP084	VPQWHEXX	0-0-0-0-0-0-0-0-0-0-0-0-0-1-0-0-0-0-0-0-0-0-0-0-0-0-0-0-0-0-0-0-0-0-0-0-0-0-0-0-1-1-1-0-1-1-1-0-1-0-2-1			36.2	0	0															VPQWHEXX																											VPQWHEXX
TDP084	FYLGRSVP	0-0-0-0-0-0-0-0-0-0-0-0-0-0-0-0-0-0-0-1-0-1-0-0-1-1-0-0-0-0-0-0-0-0-0-0-0-0-0-0-1-1-1-0-0-1-2-1-1-1-1-1			22.1	0	0																					FYLGRSVP		FYLGRSVP			FYLGRSVP	FYLGRSVP															FYLGRSVP
TDP084	PQWHEXXX	0-0-0-0-0-0-0-0-0-0-0-0-0-0-0-0-0-0-0-0-0-0-0-0-0-0-0-0-0-0-0-0-0-0-0-0-0-0-0-0-0-0-0-1-0-0-2-1-0-0-1-1			17.4	0	0
TDP084	XPDFYLGR	0-1-0-1-1-0-0-0-0-0-0-0-0-0-0-0-0-0-0-0-0-0-0-0-0-0-0-0-0-0-0-0-0-0-0-0-0-0-0-0-0-1-2-1-1-0-2-1-0-0-3-2			26.6	0	0			XPDFYLGR		XPDFYLGR	XPDFYLGR
--------
TDP084	PDFYLGRSVPQW^he	0-0-0-0-0-0-0-0-0-0-0-0-0-1-0-0-0-0-0-0-0-0-0-0-0-0-0-0-0-0-0-0-0-0-0-0-0-0-0-0-1-1-1-0-1-1-1-0-1-0-1-0			36.2	0	0
TDP084	PDFYLGRSVPQWHE	1-1-1-1-1-1-1-1-1-1-1-1-1-1-1-1-1-1-1-1-1-1-1-1-1-1-1-1-1-1-1-1-1-1-1-1-1-1-1-1-1-1-0-1-1-1-1-0-1-1-1-0	3 times in 3 NECs		41.6	25.1	0
TDP084	PDFYLGRSVPQ^whe	0-0-0-0-0-0-0-0-0-0-0-0-1-1-0-0-0-1-0-0-0-0-0-0-0-0-0-0-0-0-0-0-0-0-1-0-0-0-0-0-1-1-1-0-1-1-1-0-1-1-1-0			30.7	0	0
TDP084	PDFYLGR^svpqwhe	0-0-0-0-0-0-0-0-0-0-0-0-0-0-0-0-0-0-0-0-0-0-0-0-0-0-0-0-0-0-0-0-0-0-0-0-0-0-0-0-1-1-1-0-1-1-1-1-1-1-1-1			30.6	0	0
TDP084	pdf^YLGRSVPQWHE	0-1-0-1-1-0-0-0-0-0-0-0-0-0-0-0-0-0-0-0-0-0-0-0-0-0-0-0-0-0-0-0-0-0-0-0-0-0-0-0-0-1-1-0-1-0-1-0-0-0-1-0			25.7	0	0
TDP084	PDFYLGRSVP^qwhe	0-0-0-0-0-0-0-0-0-0-0-0-0-0-0-0-0-0-0-0-0-0-0-0-0-0-0-0-0-0-0-0-0-0-0-0-0-0-0-0-1-1-1-0-1-1-1-1-0-1-1-1			27.3	0	0
TDP084	pdf^YLGRSVPQW^he	0-0-0-0-0-0-0-0-0-0-0-0-0-0-0-0-0-0-0-0-0-0-0-0-0-0-0-0-0-0-0-0-0-0-0-0-0-0-0-0-0-0-0-0-0-0-0-0-0-0-1-1			26.6	0	0
TDP084	pdfylg^RSVPQWHE	0-0-0-0-0-0-0-0-0-0-0-0-0-0-0-0-0-0-0-1-0-1-0-0-1-1-0-0-0-0-0-0-0-0-0-0-0-0-0-0-1-1-1-0-0-1-1-1-1-1-1-1			22.1	0	0
TDP084	pd^FYLGRSVPQ^whe	0-0-0-0-0-0-0-0-0-0-0-0-0-0-0-0-0-0-0-0-0-0-0-0-0-0-0-0-0-0-0-0-0-0-0-0-0-0-0-0-0-0-1-0-0-0-0-0-0-0-1-0			18.7	0	0
TDP084	pdfy^LGRSVPQWHE	0-0-1-1-1-0-0-0-0-1-0-1-1-1-0-0-1-1-0-0-0-0-0-0-0-0-0-0-0-0-0-0-0-0-1-0-0-0-0-1-1-1-1-0-1-1-1-0-1-1-1-0			22.7	0	0
TDP084	PDFYLGRS^vpqwhe	0-0-0-0-0-0-0-0-0-0-0-0-0-0-0-0-0-0-0-0-0-0-0-0-0-0-0-0-0-0-0-0-0-0-0-0-0-0-0-0-0-0-1-0-0-0-1-1-0-0-0-0			21.4	0	0
TDP084	pd^FYLGRSVPQWHE	0-0-0-0-0-0-0-0-0-0-0-0-0-0-0-0-0-0-0-0-0-0-0-0-0-0-0-0-0-0-0-0-0-0-0-0-0-0-0-1-0-0-0-0-0-0-0-0-0-0-0-0	1 times in 3 NECs		20.7	16	0
TDP084	pdfyl^GRSVPQWHE	0-1-0-1-0-0-0-0-0-0-0-0-0-0-0-0-0-0-0-0-0-0-0-0-0-0-0-0-0-0-0-0-0-0-0-0-0-0-0-0-0-1-1-0-0-0-1-1-1-1-1-0			22.1	0	0
TDP084	pdf^YLGRSVPQ^whe	0-0-0-0-0-0-0-0-0-0-0-0-0-0-0-0-0-0-0-0-0-0-0-0-0-0-0-0-0-0-0-0-0-0-0-0-0-0-0-0-0-0-1-1-0-0-1-1-0-0-1-1			18.9	0	0
TDP084	pdfylg^RSVPQWH^e	0-0-0-0-0-0-0-0-0-0-0-0-0-0-0-0-0-0-0-0-0-0-0-0-0-0-0-0-0-0-0-0-0-0-0-0-0-0-0-0-0-0-0-0-0-0-1-0-0-0-0-0			15.9	0	0
TDP084	pdfylgr^SVPQWHE	0-0-0-0-0-0-0-0-0-0-0-0-0-0-0-0-0-0-0-0-0-0-0-0-0-0-0-0-0-0-0-0-0-0-0-0-0-0-0-0-1-1-1-1-0-1-1-1-0-1-1-1			19.6	0	0
TDP084	pdfylgr^SVPQWH^e	0-0-0-0-0-0-0-0-0-0-0-0-0-0-0-0-0-0-0-0-0-0-0-0-0-0-0-0-0-0-0-0-0-0-0-0-0-0-0-0-0-0-0-1-0-0-1-1-0-0-1-1			17.4	0	0
TDP084	pdfylgrs^VPQWHE	0-0-0-0-0-0-0-0-0-0-0-0-0-0-0-0-0-0-0-0-0-0-0-0-0-0-0-0-0-0-0-0-0-0-0-0-0-0-0-0-0-0-1-1-0-0-1-1-0-0-0-1			16.3	0	0
TDP085	XPYWDTKM	0-1-0-1-0-1-0-0-0-0-0-0-1-0-1-1-0-0-0-0-0-0-0-0-0-0-0-0-0-0-0-0-0-1-0-0-0-0-0-0-0-0-0-0-0-0-1-0-0-0-1-1			19.7	0	0			XPYWDTKM		XPYWDTKM		XPYWDTKM							XPYWDTKM		XPYWDTKM	XPYWDTKM																		XPYWDTKM
TDP085	YWDTKMHA	0-0-0-0-0-0-0-0-0-0-0-0-0-0-0-0-0-0-0-0-0-0-0-0-0-0-0-0-0-0-0-0-0-0-0-0-0-0-0-0-0-0-0-0-0-0-0-0-0-0-1-0			16.3	0	0
TDP085	WDTKMHAE	0-0-0-0-0-0-0-0-0-0-0-0-0-0-0-0-0-0-0-0-0-0-0-0-0-0-0-0-0-0-0-0-0-0-0-0-0-0-0-0-0-1-1-0-0-1-1-1-0-1-1-0			20.2	0	0
TDP085	DTKMHAEN	0-1-0-1-1-0-0-0-0-0-0-0-0-0-0-0-0-0-0-0-0-0-0-0-0-0-0-0-0-0-0-0-0-0-0-0-0-0-0-0-1-1-1-0-0-1-0-1-0-1-1-0			19.3	0	0			DTKMHAEN		DTKMHAEN	DTKMHAEN																																				DTKMHAEN
TDP085	TKMHAENI	0-0-0-0-0-0-0-0-0-0-0-0-0-0-0-0-0-0-0-0-0-0-0-0-0-0-0-0-0-0-0-0-0-0-0-0-0-0-0-0-1-1-2-0-0-1-1-0-1-1-1-0			29.3	0	0																																										TKMHAENI
TDP085	KMHAENIA	0-1-1-1-1-1-1-1-0-0-1-1-1-0-0-0-1-0-1-1-0-1-0-0-0-0-1-0-1-1-0-0-1-0-0-0-0-1-0-1-1-1-1-0-1-1-1-1-1-1-1-0			22.9	0	0			KMHAENIA	KMHAENIA	KMHAENIA	KMHAENIA	KMHAENIA	KMHAENIA	KMHAENIA			KMHAENIA	KMHAENIA	KMHAENIA				KMHAENIA		KMHAENIA	KMHAENIA		KMHAENIA					KMHAENIA		KMHAENIA	KMHAENIA			KMHAENIA					KMHAENIA		KMHAENIA	KMHAENIA
TDP085	MHAENIAQ	0-0-0-0-0-0-0-0-0-0-0-0-0-0-0-0-0-0-0-0-0-0-0-0-0-0-0-0-0-0-0-0-0-0-0-0-0-0-0-0-1-1-1-0-1-1-1-1-1-1-0-0			28.3	0	0																																										MHAENIAQ
TDP085	HAENIAQX	0-0-1-1-0-0-0-0-0-1-0-0-0-0-0-0-1-1-0-0-0-0-0-0-0-0-0-0-0-0-0-0-0-0-0-0-0-0-0-0-0-0-0-0-0-0-1-0-0-0-0-0			20.9	0	0				HAENIAQX	HAENIAQX						HAENIAQX							HAENIAQX	HAENIAQX
TDP085	PYWDTKMH	1-1-1-1-1-1-1-1-0-1-1-1-1-0-1-1-0-1-0-0-0-0-0-0-0-0-0-0-0-0-1-0-1-1-0-1-1-1-1-1-0-1-0-0-0-0-1-1-1-1-1-0	2 times in 3 NECs		25.8	15.4	0		PYWDTKMH	PYWDTKMH	PYWDTKMH	PYWDTKMH	PYWDTKMH	PYWDTKMH	PYWDTKMH	PYWDTKMH		PYWDTKMH	PYWDTKMH	PYWDTKMH	PYWDTKMH		PYWDTKMH	PYWDTKMH		PYWDTKMH													PYWDTKMH		PYWDTKMH	PYWDTKMH		PYWDTKMH	PYWDTKMH	PYWDTKMH	PYWDTKMH	PYWDTKMH
TDP085	XXXPYWDT	0-0-0-0-0-0-0-0-0-0-0-0-0-0-0-0-0-0-0-0-0-0-0-0-0-0-0-0-0-0-0-0-0-0-0-0-0-0-0-0-0-0-1-0-0-0-0-0-0-0-0-0			17	0	0
--------
TDP085	PYWDTKMH^aeniaq	0-0-0-0-0-0-0-0-0-0-0-0-0-0-0-0-0-0-0-0-0-0-0-0-0-0-0-0-0-0-0-0-0-0-0-0-0-0-0-0-1-1-1-0-0-1-1-0-1-1-1-0			29.3	0	0
TDP085	PYWDTKMHAE^niaq	0-0-0-0-0-0-0-0-0-0-0-0-0-0-0-0-0-0-0-0-0-0-0-0-0-0-0-0-0-0-0-0-0-0-0-0-0-0-0-0-1-1-1-0-1-1-1-1-1-1-0-0			28.3	0	0
TDP085	PYWDTKMHA^eniaq	0-1-1-1-1-1-1-1-0-0-1-1-1-0-0-0-1-0-1-1-0-1-0-0-0-0-1-0-1-1-0-0-1-0-0-0-0-1-0-1-1-1-1-0-1-1-1-1-1-1-1-0			22.9	0	0
TDP085	PYWDTKMHAENIAQ	1-1-0-1-0-1-1-0-1-1-1-1-1-1-1-1-1-1-1-1-1-1-0-0-0-1-1-0-0-1-1-1-1-1-0-1-0-1-1-1-1-1-0-0-0-1-1-0-1-1-1-0	2 times in 3 NECs		27.3	18.1	0
TDP085	PYWDTKMHAEN^iaq	0-0-1-1-0-0-0-0-0-1-0-0-0-0-0-0-1-1-0-0-0-0-0-0-0-0-0-0-0-0-0-0-0-0-0-0-0-0-0-0-0-0-0-0-0-0-1-0-0-0-0-0			20.9	0	0
TDP085	p^YWDTKMH^aeniaq	0-0-0-0-0-0-0-0-0-0-0-0-0-0-0-0-0-0-0-0-0-0-0-0-0-0-0-0-0-0-0-0-0-0-0-0-0-0-0-0-0-0-1-0-0-0-0-0-0-0-0-0			17	0	0
TDP085	PYWDTK^mhaeniaq	0-0-0-0-0-0-0-0-0-0-0-0-0-0-0-0-0-0-0-0-0-0-0-0-0-0-0-0-0-0-0-0-0-0-0-0-0-0-0-0-0-1-1-0-0-1-1-1-0-1-1-0			20.2	0	0
TDP085	pywd^TKMHAENIAQ	1-1-1-1-1-1-1-1-0-1-1-1-1-0-1-1-0-1-0-0-0-0-0-0-0-0-0-0-0-0-1-0-1-1-0-1-1-1-1-1-0-1-0-0-0-0-1-1-1-1-1-0	2 times in 3 NECs		25.8	15.4	0
TDP085	pyw^DTKMHAENIAQ	0-1-0-1-0-1-0-0-0-0-0-0-1-0-1-1-0-0-0-0-0-0-0-0-0-0-0-0-0-0-0-0-0-1-0-0-0-0-0-0-0-0-0-0-0-0-1-0-0-0-1-1			19.7	0	0
TDP085	PYWDTKM^haeniaq	0-1-0-1-1-0-0-0-0-0-0-0-0-0-0-0-0-0-0-0-0-0-0-0-0-0-0-0-0-0-0-0-0-0-0-0-0-0-0-0-1-1-1-0-0-1-0-1-0-1-1-0			19.3	0	0
TDP085	pywdt^KMHAENIAQ	0-0-0-0-0-0-0-0-0-0-0-0-0-0-0-0-0-0-0-0-0-0-0-0-0-0-0-0-0-0-0-0-0-0-0-0-0-0-0-0-0-0-0-0-0-0-0-0-0-0-1-0			16.3	0	0
TDP086	XLPNGQMI	0-0-0-0-0-0-0-0-0-0-0-0-0-0-0-0-0-0-0-0-0-0-0-0-0-0-0-0-0-0-0-0-0-0-0-0-0-0-0-0-0-0-0-0-0-0-0-0-0-0-1-0			20.9	0	0
TDP086	IRWHFSEN	0-0-0-0-0-0-0-0-0-1-0-0-1-1-0-0-0-1-0-0-0-0-0-0-0-0-0-0-0-0-0-0-0-0-0-0-0-0-0-0-1-1-2-0-1-1-2-1-1-2-3-1			41.3	0	0											IRWHFSEN			IRWHFSEN	IRWHFSEN				IRWHFSEN																							IRWHFSEN
TDP086	QMIRWHFS	0-0-0-0-0-0-0-0-0-1-0-0-0-1-0-0-1-1-0-0-0-1-0-0-0-0-0-0-0-1-0-0-0-0-1-1-1-0-0-0-1-1-1-1-1-1-2-2-1-1-1-2			34	0	0											QMIRWHFS				QMIRWHFS			QMIRWHFS	QMIRWHFS				QMIRWHFS								QMIRWHFS					QMIRWHFS	QMIRWHFS	QMIRWHFS				QMIRWHFS
TDP086	MIRWHFSE	1-1-1-1-1-1-1-1-1-1-1-1-1-1-1-1-1-1-0-0-0-0-0-0-0-1-0-0-0-0-1-1-1-1-1-1-1-1-1-1-1-1-2-1-1-1-1-2-1-1-2-1	2 times in 3 NECs		31.4	24.8	0		MIRWHFSE	MIRWHFSE	MIRWHFSE	MIRWHFSE	MIRWHFSE	MIRWHFSE	MIRWHFSE	MIRWHFSE	MIRWHFSE	MIRWHFSE	MIRWHFSE	MIRWHFSE	MIRWHFSE	MIRWHFSE	MIRWHFSE	MIRWHFSE	MIRWHFSE	MIRWHFSE								MIRWHFSE					MIRWHFSE	MIRWHFSE	MIRWHFSE	MIRWHFSE	MIRWHFSE	MIRWHFSE	MIRWHFSE	MIRWHFSE	MIRWHFSE	MIRWHFSE	MIRWHFSE
TDP086	RWHFSENX	0-0-1-1-1-0-0-0-0-0-0-0-0-1-0-0-0-0-0-0-0-0-0-0-0-0-0-0-0-0-0-0-0-0-0-0-0-0-0-0-1-1-0-0-1-1-1-0-1-2-2-0			29.6	0	0				RWHFSENX	RWHFSENX	RWHFSENX									RWHFSENX																											RWHFSENX
[truncated: 3,208 more rows]
[truncated: 11 more columns]

## Sheet: Colored
Row	AccNumber	Fragment Sequence	Occurrences By Time	Occurrences in matched NECs	Occurrences in unmatched NECs	Best Experimental Score	Best matched NEC Score	Best unmatched NEC Score		Karina_F3.1_0005/Karina_F3.1	Karina_F3.1_0015/Karina_F3.1	Karina_F3.1_0060/Karina_F3.1	Karina_F3.1_0240/Karina_F3.1	Karina_F3.1_1200/Karina_F3.1	Karina_F3.2_0005/Karina_F3.2	Karina_F3.2_0015/Karina_F3.2	Karina_F3.2_0060/Karina_F3.2	Karina_F3.2_0240/Karina_F3.2	Karina_F3.2_1200/Karina_F3.2	Karina_F5.1_0015/Karina_F5.1	Karina_F5.1_0060/Karina_F5.1	Karina_F5.1_0240/Karina_F5.1	Karina_F5.1_1200/Karina_F5.1	Karina_F5.2_0015/Karina_F5.2	Karina_F5.2_0060/Karina_F5.2	Karina_F5.2_0240/Karina_F5.2	Karina_F5.2_1200/Karina_F5.2	Karina_F8.1_0015/Karina_F8.1	Karina_F8.1_0060/Karina_F8.1	Karina_F8.1_0240/Karina_F8.1	Karina_F8.1_1200/Karina_F8.1	Karina_F8.2_0015/Karina_F8.2	Karina_F8.2_0060/Karina_F8.2	Karina_F8.2_0240/Karina_F8.2	Karina_F8.2_1200/Karina_F8.2	Karina_F8.3_0015/Karina_F8.3	Karina_F8.3_0060/Karina_F8.3	Karina_F8.3_0240/Karina_F8.3	Karina_F8.3_1200/Karina_F8.3	Karina_L3.1_0005/Karina_L3.1	Karina_L3.1_0015/Karina_L3.1	Karina_L3.1_0060/Karina_L3.1	Karina_L3.1_0240/Karina_L3.1	Karina_L3.1_1200/Karina_L3.1	Karina_L3.2_0005/Karina_L3.2	Karina_L3.2_0015/Karina_L3.2	Karina_L3.2_0060/Karina_L3.2	Karina_L3.2_0240/Karina_L3.2	Karina_L3.2_1200/Karina_L3.2
1	TDP001	XXLVATVY	1-1-0-0-0-0-0-0-0-0-1-1-0-0-1-0-0-1-1-1-0-1-0-0-1-0-1-0-1-1-1-1-0-0-1-1-0-0-0-1-0-1-1-1-1-0-1-1-1-1-1-0			31.9	0	0		XXLVATVY	XXLVATVY									XXLVATVY	XXLVATVY			XXLVATVY			XXLVATVY	XXLVATVY	XXLVATVY		XXLVATVY			XXLVATVY		XXLVATVY		XXLVATVY	XXLVATVY	XXLVATVY	XXLVATVY			XXLVATVY	XXLVATVY				XXLVATVY
2	TDP001	ATVYEFGH	0-0-0-1-1-0-0-0-0-0-0-0-0-0-0-0-0-0-0-0-0-0-0-0-0-0-0-0-0-0-0-0-0-1-0-0-0-0-0-1-1-1-1-2-1-1-1-1-1-1-1-2			27.5	0	0					ATVYEFGH	ATVYEFGH																													ATVYEFGH						ATVYEFGH
3	TDP001	TVYEFGHI	0-0-0-0-0-0-0-0-0-0-0-0-0-0-0-0-0-0-0-0-0-0-0-0-0-0-0-0-0-0-0-0-0-0-0-0-0-0-0-0-0-0-1-1-0-0-1-1-0-0-0-0			22.9	0	0
4	TDP001	VYEFGHID	0-0-0-0-0-0-0-0-0-0-0-0-0-0-0-0-0-0-0-0-0-0-0-0-0-0-0-0-0-0-0-0-0-0-0-0-0-0-0-0-0-0-0-0-0-0-0-0-0-0-1-0			15	0	0
5	TDP001	EFGHIDHM	0-0-0-0-0-0-0-0-0-0-0-0-0-0-0-0-0-0-0-0-0-0-0-0-0-0-0-0-0-0-0-0-0-0-0-0-0-0-0-0-0-0-1-2-0-1-1-4-0-0-0-0			30	0	0
6	TDP001	FGHIDHMX	0-0-0-0-0-0-0-0-0-0-0-0-0-0-0-0-0-0-0-0-0-0-0-0-0-0-0-0-0-0-0-0-0-0-0-0-0-0-0-0-0-0-0-0-0-0-1-1-0-0-1-0			20.8	0	0
7	TDP001	GHIDHMXX	1-1-1-1-1-1-0-1-1-1-1-1-1-1-1-0-1-1-1-1-1-0-0-0-0-0-1-0-0-0-0-0-1-1-1-1-1-1-1-1-1-1-2-1-1-1-2-2-1-1-2-2	2 times in 3 NECs		29.8	25.7	0		GHIDHMXX	GHIDHMXX	GHIDHMXX	GHIDHMXX	GHIDHMXX	GHIDHMXX		GHIDHMXX	GHIDHMXX	GHIDHMXX	GHIDHMXX	GHIDHMXX	GHIDHMXX	GHIDHMXX	GHIDHMXX		GHIDHMXX	GHIDHMXX	GHIDHMXX	GHIDHMXX	GHIDHMXX						GHIDHMXX						GHIDHMXX	GHIDHMXX	GHIDHMXX	GHIDHMXX	GHIDHMXX	GHIDHMXX	GHIDHMXX	GHIDHMXX
8	TDP001	HIDHMXXX	0-0-0-1-1-0-1-0-1-0-0-0-1-0-0-0-0-0-0-0-0-0-0-0-0-0-0-0-0-0-0-0-0-1-1-0-0-0-1-1-0-0-1-0-0-0-0-1-0-0-1-0			34.7	0	0					HIDHMXXX	HIDHMXXX		HIDHMXXX		HIDHMXXX				HIDHMXXX																					HIDHMXXX	HIDHMXXX				HIDHMXXX	HIDHMXXX
9	TDP001	XLVATVYE	0-0-0-1-1-0-0-0-0-0-0-0-0-0-0-0-0-0-0-0-0-0-0-0-0-0-0-0-0-0-0-0-0-0-0-0-0-0-0-0-0-1-1-2-0-0-1-3-0-1-1-2			33	0	0					XLVATVYE	XLVATVYE
10	TDP001	XXXLVATV	0-0-0-1-1-1-1-1-0-1-1-1-1-0-0-1-1-1-0-1-1-1-0-0-0-0-0-0-1-1-1-1-0-1-0-1-0-1-0-1-0-1-0-0-1-1-1-3-1-1-1-0			31.9	0	0					XXXLVATV	XXXLVATV	XXXLVATV	XXXLVATV	XXXLVATV		XXXLVATV	XXXLVATV	XXXLVATV	XXXLVATV			XXXLVATV	XXXLVATV	XXXLVATV		XXXLVATV	XXXLVATV	XXXLVATV							XXXLVATV	XXXLVATV	XXXLVATV	XXXLVATV		XXXLVATV		XXXLVATV		XXXLVATV		XXXLVATV
11	TDP001	LVATVYEF	0-0-0-0-1-0-0-0-0-0-0-0-1-0-0-0-0-0-0-0-0-0-0-0-0-0-0-0-0-0-0-0-0-0-0-0-0-0-0-1-1-1-2-2-1-1-2-3-1-1-2-2			29.5	0	0						LVATVYEF								LVATVYEF																											LVATVYEF
12	TDP001	VATVYEFG	0-0-0-0-1-0-0-0-0-0-0-0-0-0-0-0-0-0-0-0-0-0-0-0-0-0-0-0-0-0-0-0-0-0-0-0-0-0-0-0-1-1-1-1-1-0-1-1-1-1-1-1			30	0	0						VATVYEFG
13	--------
14	TDP001	LVATVYEFGHIDHM	1-1-1-1-1-1-1-1-1-1-1-1-1-1-1-1-1-1-1-1-1-1-1-1-1-1-1-1-1-1-1-1-1-1-1-1-1-1-1-1-1-1-1-1-1-1-1-1-1-1-1-1	3 times in 3 NECs		39.4	37.3	0
15	TDP001	LVATVYEFGHIDH^m	0-0-0-1-1-0-1-0-1-0-0-0-1-0-0-0-0-0-0-0-0-0-0-0-0-0-0-0-0-0-0-0-0-1-1-0-0-0-1-1-0-0-1-0-0-0-0-0-0-0-1-0			34.7	0	0
16	TDP001	lva^TVYEFGHIDHM	0-0-0-1-1-0-0-0-0-0-0-0-0-0-0-0-0-0-0-0-0-0-0-0-0-0-0-0-0-0-0-0-0-0-0-0-0-0-0-0-0-1-1-1-0-0-1-1-0-1-1-1			33	0	0
17	TDP001	LVATVYEFGHID^hm	1-1-1-1-1-1-0-1-1-1-1-1-1-1-1-0-1-1-1-1-1-0-0-0-0-0-1-0-0-0-0-0-1-1-1-1-1-1-1-1-1-1-1-0-1-1-1-0-1-1-1-0	2 times in 3 NECs		29.8	25.7	0
18	TDP001	l^VATVYEFGHIDHM	0-0-0-1-1-1-1-1-0-1-1-1-1-0-0-1-1-1-0-1-1-1-0-0-0-0-0-0-1-1-1-1-0-1-0-1-0-1-0-1-0-1-0-0-1-1-1-1-1-1-1-0			31.9	0	0
19	TDP001	LVATVYEFGH^idhm	0-0-0-0-0-0-0-0-0-0-0-0-0-0-0-0-0-0-0-0-0-0-0-0-0-0-0-0-0-0-0-0-0-0-0-0-0-0-0-0-0-0-1-0-0-1-1-1-0-0-0-0			30	0	0
20	TDP001	lv^ATVYEFGHIDHM	1-1-0-0-0-0-0-0-0-0-1-1-0-0-1-0-0-1-1-1-0-1-0-0-1-0-1-0-1-1-1-1-0-0-1-1-0-0-0-1-0-1-1-1-1-0-1-1-1-1-1-0			31.9	0	0
21	TDP001	LVATVYEFGHI^dhm	0-0-0-0-0-0-0-0-0-0-0-0-0-0-0-0-0-0-0-0-0-0-0-0-0-0-0-0-0-0-0-0-0-0-0-0-0-0-0-0-0-0-0-0-0-0-1-1-0-0-1-0			20.8	0	0
22	TDP001	lva^TVYEFGHIDH^m	0-0-0-0-0-0-0-0-0-0-0-0-0-0-0-0-0-0-0-0-0-0-0-0-0-0-0-0-0-0-0-0-0-0-0-0-0-0-0-0-0-0-0-0-0-0-0-1-0-0-0-0			24.1	0	0
23	TDP001	lvatv^YEFGHIDHM	0-0-0-0-1-0-0-0-0-0-0-0-0-0-0-0-0-0-0-0-0-0-0-0-0-0-0-0-0-0-0-0-0-0-0-0-0-0-0-0-1-1-1-1-1-0-1-1-1-1-1-1			30	0	0
24	TDP001	lvat^VYEFGHIDHM	0-0-0-0-1-0-0-0-0-0-0-0-1-0-0-0-0-0-0-0-0-0-0-0-0-0-0-0-0-0-0-0-0-0-0-0-0-0-0-1-1-1-1-0-1-1-1-1-1-1-1-1			29.5	0	0
25	TDP001	lva^TVYEFGHID^hm	0-0-0-0-0-0-0-0-0-0-0-0-0-0-0-0-0-0-0-0-0-0-0-0-0-0-0-0-0-0-0-0-0-0-0-0-0-0-0-0-0-0-0-0-0-0-0-0-0-0-0-1			19.8	0	0
26	TDP001	lvatvy^EFGHIDHM	0-0-0-1-1-0-0-0-0-0-0-0-0-0-0-0-0-0-0-0-0-0-0-0-0-0-0-0-0-0-0-0-0-1-0-0-0-0-0-1-1-1-1-2-1-1-1-1-1-1-1-2			27.5	0	0
27	TDP001	l^VATVYEFGH^idhm	0-0-0-0-0-0-0-0-0-0-0-0-0-0-0-0-0-0-0-0-0-0-0-0-0-0-0-0-0-0-0-0-0-0-0-0-0-0-0-0-0-0-0-0-0-0-0-1-0-0-0-0			17.6	0	0
28	TDP001	lva^TVYEFGH^idhm	0-0-0-0-0-0-0-0-0-0-0-0-0-0-0-0-0-0-0-0-0-0-0-0-0-0-0-0-0-0-0-0-0-0-0-0-0-0-0-0-0-0-0-1-0-0-0-1-0-0-0-0			18.7	0	0
29	TDP001	l^VATVYEFGHID^hm	0-0-0-0-0-0-0-0-0-0-0-0-0-0-0-0-0-0-0-0-0-0-0-0-0-0-0-0-0-0-0-0-0-0-0-0-0-0-0-0-0-0-0-0-0-0-0-1-0-0-0-0			15.7	0	0
30	TDP001	lvat^VYEFGHID^hm	0-0-0-0-0-0-0-0-0-0-0-0-0-0-0-0-0-0-0-0-0-0-0-0-0-0-0-0-0-0-0-0-0-0-0-0-0-0-0-0-0-0-1-1-0-0-1-1-0-0-1-1			19.5	0	0
31	TDP001	lvat^VYEFGH^idhm	0-0-0-0-0-0-0-0-0-0-0-0-0-0-0-0-0-0-0-0-0-0-0-0-0-0-0-0-0-0-0-0-0-0-0-0-0-0-0-0-0-0-0-1-0-0-0-1-0-0-0-0			17.3	0	0
32	TDP001	lvatvye^FGHIDHM	0-0-0-0-0-0-0-0-0-0-0-0-0-0-0-0-0-0-0-0-0-0-0-0-0-0-0-0-0-0-0-0-0-0-0-0-0-0-0-0-0-0-1-1-0-0-1-1-0-0-0-0			22.9	0	0
33	TDP001	lvatvyef^GHIDHM	0-0-0-0-0-0-0-0-0-0-0-0-0-0-0-0-0-0-0-0-0-0-0-0-0-0-0-0-0-0-0-0-0-0-0-0-0-0-0-0-0-0-0-0-0-0-0-0-0-0-1-0			15	0	0
34
35
36	TDP002	XXMLDKLM	0-0-0-0-0-0-0-0-0-0-0-0-0-0-0-0-0-0-0-0-0-0-0-0-0-0-1-0-0-0-0-0-0-0-0-0-0-0-0-1-0-2-2-0-0-1-2-2-1-1-1-0			35.8	0	0																												XXMLDKLM													XXMLDKLM
37	TDP002	WPQRRGMX	0-0-0-0-0-0-0-0-0-0-0-0-0-1-0-0-1-0-0-0-0-1-0-0-0-0-0-0-0-0-0-0-0-0-0-0-0-0-0-0-2-2-4-1-1-2-3-4-1-2-2-1			43.1	0	0															WPQRRGMX			WPQRRGMX					WPQRRGMX
38	TDP002	PQRRGMXX	0-0-0-0-0-0-0-0-0-0-0-1-1-1-0-0-0-0-0-0-0-0-0-0-0-0-0-0-0-0-0-0-0-0-0-0-0-0-0-0-2-5-2-1-1-1-5-2-3-5-4-1			46.8	0	0													PQRRGMXX	PQRRGMXX	PQRRGMXX
39	TDP002	XMLDKLMN	0-0-0-0-0-0-0-0-0-0-0-0-0-0-0-0-0-0-0-0-0-0-0-0-0-0-0-0-0-0-0-0-0-0-0-0-0-0-0-0-0-1-0-0-0-0-1-0-0-1-1-0			20.3	0	0
40	TDP002	XXXMLDKL	0-0-0-0-0-0-0-0-0-0-0-0-0-0-0-0-0-0-0-1-0-1-0-0-0-0-0-0-0-0-0-1-0-0-0-0-0-0-0-0-1-2-0-0-1-0-1-0-1-1-0-0			25.1	0	0																					XXXMLDKL		XXXMLDKL										XXXMLDKL
41	TDP002	KLMNWPQR	0-0-0-0-0-0-0-0-0-0-0-0-0-1-0-0-0-0-0-0-0-0-0-0-0-0-0-0-0-0-0-0-0-0-0-0-0-0-0-0-0-0-0-0-0-1-1-1-0-0-0-0			16.4	0	0															KLMNWPQR
42	TDP002	NWPQRRGM	0-0-0-0-0-0-0-0-0-0-0-0-0-0-0-0-0-0-0-0-0-0-0-0-0-0-0-0-0-0-0-0-0-0-0-0-0-0-0-0-1-1-0-0-0-0-1-0-1-1-0-0			22.2	0	0
43	TDP002	QRRGMXXX	0-0-0-0-0-0-1-0-0-0-0-1-1-1-0-0-1-0-0-0-0-0-0-0-0-0-0-0-0-0-0-0-0-0-0-0-0-0-0-1-0-0-0-0-0-1-0-0-0-0-0-0			26.7	0	0								QRRGMXXX					QRRGMXXX	QRRGMXXX	QRRGMXXX			QRRGMXXX																							QRRGMXXX
44	TDP002	MLDKLMNW	0-0-0-0-0-0-0-0-0-0-0-0-0-0-0-0-0-0-0-0-0-0-0-0-0-0-0-0-0-0-0-0-0-0-0-0-0-0-0-0-0-0-1-0-0-1-3-1-0-0-0-0			21.9	0	0
45	TDP002	LDKLMNWP	0-0-0-0-1-0-0-0-0-0-0-0-0-0-0-0-0-0-0-0-0-0-0-0-0-0-0-0-0-0-0-0-0-0-0-0-0-0-0-0-3-2-2-1-1-2-3-2-2-3-2-2			24.5	0	0						LDKLMNWP
46	--------
47	TDP002	MLDKLMNWPQRR^gm	0-0-0-0-0-0-0-0-0-0-0-1-1-1-0-0-0-0-0-0-0-0-0-0-0-0-0-0-0-0-0-0-0-0-0-0-0-0-0-0-1-1-0-1-1-1-1-0-1-1-1-0			46.8	0	0
48	TDP002	MLDKLMNWPQR^rgm	0-0-0-0-0-0-0-0-0-0-0-0-0-1-0-0-1-0-0-0-0-1-0-0-0-0-0-0-0-0-0-0-0-0-0-0-0-0-0-0-1-1-1-0-1-1-1-1-1-1-1-0			43.1	0	0
49	TDP002	MLDKLMNWPQRRGM	1-1-1-1-1-1-1-1-1-1-1-1-1-1-1-1-1-1-1-1-1-1-1-1-1-1-1-1-1-1-1-1-1-1-1-1-1-1-1-1-1-1-0-0-1-1-1-0-1-1-0-0	3 times in 3 NECs		34.8	31.5	0
50	TDP002	ml^DKLMNWPQRR^gm	0-0-0-0-0-0-0-0-0-0-0-0-0-0-0-0-0-0-0-0-0-0-0-0-0-0-0-0-0-0-0-0-0-0-0-0-0-0-0-0-0-1-1-0-0-0-1-1-0-1-1-0			35.8	0	0
51	TDP002	MLDKLMNWPQRRG^m	0-0-0-0-0-0-1-0-0-0-0-1-1-1-0-0-1-0-0-0-0-0-0-0-0-0-0-0-0-0-0-0-0-0-0-0-0-0-0-1-0-0-0-0-0-1-0-0-0-0-0-0			26.7	0	0
52	TDP002	m^LDKLMNWPQRR^gm	0-0-0-0-0-0-0-0-0-0-0-0-0-0-0-0-0-0-0-0-0-0-0-0-0-0-0-0-0-0-0-0-0-0-0-0-0-0-0-0-0-1-0-0-0-0-0-0-1-1-0-0			25.1	0	0
53	TDP002	ml^DKLMNWPQR^rgm	0-0-0-0-0-0-0-0-0-0-0-0-0-0-0-0-0-0-0-0-0-0-0-0-0-0-0-0-0-0-0-0-0-0-0-0-0-0-0-0-0-0-1-0-0-0-0-1-0-0-0-0			25.2	0	0
54	TDP002	mldkl^MNWPQRR^gm	0-0-0-0-0-0-0-0-0-0-0-0-0-0-0-0-0-0-0-0-0-0-0-0-0-0-0-0-0-0-0-0-0-0-0-0-0-0-0-0-1-1-1-0-0-0-1-1-1-1-1-1			23.6	0	0
55	TDP002	m^LDKLMNWPQRRGM	0-0-0-0-0-0-0-0-0-0-0-0-0-0-0-0-0-0-0-1-0-1-0-0-0-0-0-0-0-0-0-1-0-0-0-0-0-0-0-0-1-1-0-0-1-0-1-0-0-0-0-0			21.3	0	0
56	TDP002	ml^DKLMNWPQRRGM	0-0-0-0-0-0-0-0-0-0-0-0-0-0-0-0-0-0-0-0-0-0-0-0-0-0-1-0-0-0-0-0-0-0-0-0-0-0-0-1-0-1-0-0-0-1-1-0-1-0-0-0			24.2	0	0
57	TDP002	mldkl^MNWPQR^rgm	0-0-0-0-0-0-0-0-0-0-0-0-0-0-0-0-0-0-0-0-0-0-0-0-0-0-0-0-0-0-0-0-0-0-0-0-0-0-0-0-1-1-1-1-0-1-1-1-0-1-1-1			20.1	0	0
58	TDP002	MLDKLMNWPQ^rrgm	0-0-0-0-0-0-0-0-0-0-0-0-0-0-0-0-0-0-0-0-0-0-0-0-0-0-0-0-0-0-0-0-0-0-0-0-0-0-0-0-1-1-0-0-0-0-1-0-1-1-0-0			22.2	0	0
59	TDP002	mldk^LMNWPQR^rgm	0-0-0-0-0-0-0-0-0-0-0-0-0-0-0-0-0-0-0-0-0-0-0-0-0-0-0-0-0-0-0-0-0-0-0-0-0-0-0-0-0-0-1-0-0-0-1-1-0-0-0-0			21.9	0	0
60	TDP002	mld^KLMNWPQRR^gm	0-0-0-0-0-0-0-0-0-0-0-0-0-0-0-0-0-0-0-0-0-0-0-0-0-0-0-0-0-0-0-0-0-0-0-0-0-0-0-0-0-1-0-0-0-0-1-0-0-1-1-0			20.3	0	0
61	TDP002	mldk^LMNWPQRR^gm	0-0-0-0-0-0-0-0-0-0-0-0-0-0-0-0-0-0-0-0-0-0-0-0-0-0-0-0-0-0-0-0-0-0-0-0-0-0-0-0-0-0-0-0-0-0-1-0-0-0-0-0			17.7	0	0
62	TDP002	mldkl^MNWPQRRGM	0-0-0-0-1-0-0-0-0-0-0-0-0-0-0-0-0-0-0-0-0-0-0-0-0-0-0-0-0-0-0-0-0-0-0-0-0-0-0-0-1-0-0-0-1-1-1-0-1-1-0-0			24.5	0	0
63	TDP002	MLDKLMN^wpqrrgm	0-0-0-0-0-0-0-0-0-0-0-0-0-1-0-0-0-0-0-0-0-0-0-0-0-0-0-0-0-0-0-0-0-0-0-0-0-0-0-0-0-0-0-0-0-1-1-1-0-0-0-0			16.4	0	0
64	TDP002	mldk^LMNWPQRRGM	0-0-0-0-0-0-0-0-0-0-0-0-0-0-0-0-0-0-0-0-0-0-0-0-0-0-0-0-0-0-0-0-0-0-0-0-0-0-0-0-0-0-0-0-0-1-1-0-0-0-0-0			19.5	0	0
65
66
67	TDP003	XAVRAVEG	0-0-0-0-0-0-0-0-0-0-0-0-0-0-0-0-0-0-0-0-0-0-0-0-0-0-0-0-0-0-0-0-0-0-0-0-0-0-0-0-0-2-0-0-0-0-0-0-0-2-1-0			20.5	0	0
68	TDP003	IKMWQSMX	0-0-0-0-0-0-0-0-0-0-0-0-0-0-0-0-0-0-0-0-0-0-0-0-0-0-0-0-0-0-0-0-0-0-0-0-0-0-0-0-2-3-0-0-1-1-3-0-1-3-5-1			23	0	0
69	TDP003	VEGIKMWQ	0-0-0-0-0-0-0-0-0-0-0-0-0-0-0-0-0-0-0-0-0-0-0-0-0-0-0-0-0-0-0-0-0-0-0-0-0-0-0-0-0-0-1-0-0-0-1-1-0-0-1-1			17.7	0	0
70	TDP003	EGIKMWQS	0-0-0-0-1-0-0-0-0-0-0-0-0-0-0-0-0-0-0-0-0-0-0-0-0-0-0-0-0-0-0-0-0-0-0-0-0-0-0-0-0-0-1-1-0-0-1-1-0-0-1-0			24.9	0	0						EGIKMWQS
71	TDP003	GIKMWQSM	0-1-1-1-2-0-0-0-0-0-0-0-0-1-0-0-0-1-0-0-0-0-0-0-0-0-0-0-0-0-0-0-0-0-0-0-0-0-0-0-0-0-0-0-0-0-0-0-0-0-0-0			25.3	0	0			GIKMWQSM	GIKMWQSM	GIKMWQSM	GIKMWQSM									GIKMWQSM				GIKMWQSM
72	TDP003	KMWQSMXX	0-0-0-1-0-0-1-0-0-2-0-1-2-1-0-0-0-0-0-0-0-0-0-0-0-0-0-0-0-0-0-0-0-0-0-0-0-0-0-0-0-0-0-0-0-1-1-0-0-0-0-0			22.2	0	0					KMWQSMXX			KMWQSMXX			KMWQSMXX		KMWQSMXX	KMWQSMXX	KMWQSMXX
73	TDP003	MWQSMXXX	0-0-0-0-0-0-0-0-0-0-0-0-0-0-0-0-0-0-0-0-0-0-0-0-0-0-0-0-0-0-0-0-0-0-0-0-0-0-0-1-0-0-0-0-0-0-0-0-0-0-0-0			16	0	0																																									MWQSMXXX
74	TDP003	XXAVRAVE	0-0-0-0-0-0-0-0-0-0-0-0-0-0-0-0-0-0-0-0-0-0-0-0-0-0-0-0-0-0-0-0-0-0-0-0-0-0-0-0-0-0-0-0-0-0-0-0-0-0-1-0			18.1	0	0
75	TDP003	AVRAVEGI	0-0-0-0-0-0-0-0-0-0-0-0-0-0-0-0-0-0-0-0-0-0-0-0-0-0-0-0-0-0-0-0-0-0-0-0-0-0-0-0-0-0-0-0-0-0-2-0-0-1-1-1			17.9	0	0
76	TDP003	XXXAVRAV	1-1-0-0-1-1-1-1-1-1-1-1-1-0-1-1-0-1-1-1-1-0-0-1-0-0-1-0-1-1-1-1-1-1-1-0-1-0-1-1-2-2-0-0-1-1-1-0-0-1-1-0	3 times in 3 NECs		23	20.7	0		XXXAVRAV	XXXAVRAV			XXXAVRAV	XXXAVRAV	XXXAVRAV	XXXAVRAV	XXXAVRAV	XXXAVRAV	XXXAVRAV	XXXAVRAV	XXXAVRAV		XXXAVRAV	XXXAVRAV		XXXAVRAV	XXXAVRAV	XXXAVRAV	XXXAVRAV			XXXAVRAV			XXXAVRAV		XXXAVRAV	XXXAVRAV	XXXAVRAV	XXXAVRAV	XXXAVRAV	XXXAVRAV	XXXAVRAV		XXXAVRAV		XXXAVRAV	XXXAVRAV
77	--------
78	TDP003	a^VRAVEGIKMW^qsm	0-0-0-0-0-0-0-0-0-0-0-0-0-0-0-0-0-0-0-0-0-0-0-0-0-0-0-0-0-0-0-0-0-0-0-0-0-0-0-0-1-1-0-0-0-0-1-0-0-1-1-0			23	0	0
79	TDP003	a^VRAVEGIKMWQSM	1-1-0-0-0-1-1-1-1-0-1-1-0-0-1-1-0-1-1-1-1-0-0-1-0-0-1-0-1-1-1-1-1-1-1-0-1-0-1-1-1-1-0-0-1-1-0-0-0-0-0-0	3 times in 3 NECs		22.4	20.7	0
80	TDP003	AVRAVEGIKMWQ^sm	0-0-0-1-0-0-1-0-0-1-0-1-1-1-0-0-0-0-0-0-0-0-0-0-0-0-0-0-0-0-0-0-0-0-0-0-0-0-0-0-0-0-0-0-0-1-1-0-0-0-0-0			22.2	0	0
81	TDP003	AVRAVEGIKMWQSM	1-1-1-0-0-1-1-1-1-1-1-1-0-0-1-1-1-1-1-1-1-1-1-0-0-1-1-1-0-1-1-1-1-0-1-1-1-0-1-1-0-1-0-1-1-0-1-1-1-1-1-1	3 times in 3 NECs		24.7	24.5	0
82	TDP003	AVRAVEGIKMW^qsm	0-0-0-0-0-0-0-0-0-0-0-0-0-0-0-0-0-0-0-0-0-0-0-0-0-0-0-0-0-0-0-0-0-0-0-0-0-0-0-0-1-1-0-0-1-1-1-0-1-0-1-0			22.2	0	0
83	TDP003	AVRAVEGIKM^wqsm	0-1-1-1-1-0-0-0-0-0-0-0-0-1-0-0-0-1-0-0-0-0-0-0-0-0-0-0-0-0-0-0-0-0-0-0-0-0-0-0-0-0-0-0-0-0-0-0-0-0-0-0			25.3	0	0
84	TDP003	AVRAVEGIK^mwqsm	0-0-0-0-1-0-0-0-0-0-0-0-0-0-0-0-0-0-0-0-0-0-0-0-0-0-0-0-0-0-0-0-0-0-0-0-0-0-0-0-0-0-1-1-0-0-1-1-0-0-1-0			24.9	0	0
85	TDP003	a^VRAVEGIKMWQ^sm	0-0-0-0-0-0-0-0-0-1-0-0-1-0-0-0-0-0-0-0-0-0-0-0-0-0-0-0-0-0-0-0-0-0-0-0-0-0-0-0-0-0-0-0-0-0-0-0-0-0-0-0			20.2	0	0
86	TDP003	AVRAVEGIKMWQS^m	0-0-0-0-0-0-0-0-0-0-0-0-0-0-0-0-0-0-0-0-0-0-0-0-0-0-0-0-0-0-0-0-0-0-0-0-0-0-0-1-0-0-0-0-0-0-0-0-0-0-0-0			16	0	0
87	TDP003	avra^VEGIKMW^qsm	0-0-0-0-0-0-0-0-0-0-0-0-0-0-0-0-0-0-0-0-0-0-0-0-0-0-0-0-0-0-0-0-0-0-0-0-0-0-0-0-0-0-0-0-0-0-1-0-0-1-1-1			17.9	0	0
88	TDP003	avra^VEGIKMWQSM	0-0-0-0-0-0-0-0-0-0-0-0-0-0-0-0-0-0-0-0-0-0-0-0-0-0-0-0-0-0-0-0-0-0-0-0-0-0-0-0-0-0-0-0-0-0-1-0-0-0-0-0			16.5	0	0
89	TDP003	avr^AVEGIKMW^qsm	0-0-0-0-0-0-0-0-0-0-0-0-0-0-0-0-0-0-0-0-0-0-0-0-0-0-0-0-0-0-0-0-0-0-0-0-0-0-0-0-0-1-0-0-0-0-0-0-0-1-1-0			20.5	0	0
90	TDP003	avr^AVEGIKMWQSM	0-0-0-0-0-0-0-0-0-0-0-0-0-0-0-0-0-0-0-0-0-0-0-0-0-0-0-0-0-0-0-0-0-0-0-0-0-0-0-0-0-1-0-0-0-0-0-0-0-1-0-0			16.5	0	0
91	TDP003	AVRAVEGI^kmwqsm	0-0-0-0-0-0-0-0-0-0-0-0-0-0-0-0-0-0-0-0-0-0-0-0-0-0-0-0-0-0-0-0-0-0-0-0-0-0-0-0-0-0-1-0-0-0-1-1-0-0-1-1			17.7	0	0
92	TDP003	av^RAVEGIKMW^qsm	0-0-0-0-0-0-0-0-0-0-0-0-0-0-0-0-0-0-0-0-0-0-0-0-0-0-0-0-0-0-0-0-0-0-0-0-0-0-0-0-0-0-0-0-0-0-0-0-0-0-1-0			18.1	0	0
93	TDP003	a^VRAVEGIKM^wqsm	0-0-0-0-1-0-0-0-0-0-0-0-0-0-0-0-0-0-0-0-0-0-0-0-0-0-0-0-0-0-0-0-0-0-0-0-0-0-0-0-0-0-0-0-0-0-0-0-0-0-0-0			15.2	0	0
94
95
96	TDP004	QSTYFHDL	0-0-0-0-0-0-0-0-0-0-0-0-0-0-0-0-0-0-0-0-0-0-0-0-0-0-0-0-0-0-0-0-0-0-0-0-0-0-0-0-1-1-1-0-0-1-1-1-0-1-1-1			19.3	0	0
97	TDP004	TYFHDLNP	0-0-0-1-0-0-0-0-0-0-0-0-0-0-0-0-0-0-0-0-0-0-0-0-0-0-0-0-0-0-0-0-0-0-0-0-0-0-0-0-1-1-1-0-1-1-1-1-1-1-1-1			24.5	0	0					TYFHDLNP
98	TDP004	YFHDLNPY	0-0-0-0-0-0-0-0-0-0-0-0-0-0-0-0-0-0-0-0-0-0-0-0-0-0-0-0-0-0-0-0-0-0-0-0-0-0-0-0-0-1-1-0-1-1-1-2-1-1-1-0			21.5	0	0
99	TDP004	HDLNPYMX	0-0-0-0-1-0-0-0-0-0-0-0-0-0-0-0-0-0-0-0-0-0-0-0-0-0-0-0-0-0-0-0-0-0-0-0-0-0-0-0-0-0-0-0-0-0-0-0-0-0-0-0			16.1	0	0						HDLNPYMX
100	TDP004	STYFHDLN	0-0-0-0-1-0-0-0-0-0-0-0-0-0-0-0-0-0-0-0-0-0-0-0-0-0-0-0-0-0-0-0-0-0-0-0-0-0-0-0-0-0-0-0-0-0-0-0-0-0-0-0			15.4	0	0						STYFHDLN
101	TDP004	XXXGIQST	0-0-0-0-0-0-0-0-0-0-0-0-0-0-0-0-0-0-0-0-0-1-0-0-0-0-0-0-0-0-0-0-0-0-0-0-0-0-0-0-0-0-0-0-0-0-0-1-0-0-0-0			16.9	0	0																							XXXGIQST
102	TDP004	XXGIQSTY	0-0-0-0-0-0-0-0-0-0-0-0-0-0-0-0-0-0-0-0-0-0-0-0-0-0-0-0-0-0-0-0-0-0-0-0-0-0-0-0-0-1-0-0-0-0-1-0-0-0-1-0			21	0	0
103	TDP004	XGIQSTYF	0-0-0-0-0-0-0-0-0-0-0-0-0-0-0-0-0-0-0-0-0-1-0-0-0-0-0-0-0-1-0-1-0-0-2-0-0-0-0-1-1-1-1-0-0-1-1-1-1-1-1-0			19.8	0	0																							XGIQSTYF								XGIQSTYF		XGIQSTYF			XGIQSTYF					XGIQSTYF
104	TDP004	LNPYMXXX	0-0-0-0-0-0-0-0-0-0-0-0-0-0-0-0-0-0-0-0-0-0-0-0-0-0-0-0-0-0-0-0-0-0-1-0-0-0-0-0-0-0-0-0-0-0-0-0-0-0-0-0			16.5	0	0																																				LNPYMXXX
105	TDP004	GIQSTYFH	0-0-0-0-0-0-0-0-0-0-0-0-0-0-0-0-0-0-0-0-0-0-0-0-0-0-0-0-0-0-0-0-0-0-0-0-0-0-0-0-1-1-1-0-1-1-1-1-1-1-1-0			18.3	0	0
106	TDP004	IQSTYFHD	0-0-0-0-0-0-0-0-0-0-0-0-0-0-0-0-0-0-0-0-0-0-0-0-0-0-0-0-0-0-0-0-0-0-0-0-0-0-0-0-0-1-1-0-1-1-1-0-1-0-1-1			17.6	0	0
107	--------
108	TDP004	GIQSTYFH^dlnpym	0-0-0-1-0-0-0-0-0-0-0-0-0-0-0-0-0-0-0-0-0-0-0-0-0-0-0-0-0-0-0-0-0-0-0-0-0-0-0-0-1-1-1-0-1-1-1-1-1-1-1-1			24.5	0	0
109	TDP004	GIQSTYFHDLNPYM	1-1-1-1-1-1-1-1-1-1-1-1-1-1-1-1-1-1-1-1-1-1-1-1-1-1-1-1-1-1-1-1-1-1-1-1-1-1-1-1-1-1-0-0-1-1-1-0-1-1-1-0	3 times in 3 NECs		19.7	18.6	0
110	TDP004	giq^STYFHDLNPYM	0-0-0-0-0-0-0-0-0-0-0-0-0-0-0-0-0-0-0-0-0-1-0-0-0-0-0-0-0-1-0-1-0-0-1-0-0-0-0-1-1-1-1-0-0-1-1-1-1-1-1-0			19.8	0	0
111	TDP004	GIQSTYFHD^lnpym	0-0-0-0-0-0-0-0-0-0-0-0-0-0-0-0-0-0-0-0-0-0-0-0-0-0-0-0-0-0-0-0-0-0-0-0-0-0-0-0-0-1-1-0-1-1-1-1-1-1-1-0			21.5	0	0
112	TDP004	giqs^TYFHDLNPYM	0-0-0-0-0-0-0-0-0-0-0-0-0-0-0-0-0-0-0-0-0-0-0-0-0-0-0-0-0-0-0-0-0-0-0-0-0-0-0-0-1-1-1-0-1-1-1-1-1-1-1-0			18.3	0	0
113	TDP004	gi^QSTYFHDLNPYM	0-0-0-0-0-0-0-0-0-0-0-0-0-0-0-0-0-0-0-0-0-0-0-0-0-0-0-0-0-0-0-0-0-0-0-0-0-0-0-0-0-1-0-0-0-0-1-0-0-0-1-0			21	0	0
114	TDP004	GIQSTYFHDLN^pym	0-0-0-0-1-0-0-0-0-0-0-0-0-0-0-0-0-0-0-0-0-0-0-0-0-0-0-0-0-0-0-0-0-0-0-0-0-0-0-0-0-0-0-0-0-0-0-0-0-0-0-0			16.1	0	0
115	TDP004	giq^STYFHDLNPY^m	0-0-0-0-0-0-0-0-0-0-0-0-0-0-0-0-0-0-0-0-0-0-0-0-0-0-0-0-0-0-0-0-0-0-1-0-0-0-0-0-0-0-0-0-0-0-0-0-0-0-0-0			16.5	0	0
116	TDP004	giqsty^FHDLNPYM	0-0-0-0-0-0-0-0-0-0-0-0-0-0-0-0-0-0-0-0-0-0-0-0-0-0-0-0-0-0-0-0-0-0-0-0-0-0-0-0-1-1-1-0-0-1-1-1-0-1-1-1			19.3	0	0
117	TDP004	g^IQSTYFHDLNPYM	0-0-0-0-0-0-0-0-0-0-0-0-0-0-0-0-0-0-0-0-0-1-0-0-0-0-0-0-0-0-0-0-0-0-0-0-0-0-0-0-0-0-0-0-0-0-0-0-0-0-0-0			15.4	0	0
118	TDP004	giqst^YFHDLNPYM	0-0-0-0-0-0-0-0-0-0-0-0-0-0-0-0-0-0-0-0-0-0-0-0-0-0-0-0-0-0-0-0-0-0-0-0-0-0-0-0-0-1-1-0-1-1-1-0-1-0-1-1			17.6	0	0
119	TDP004	giqstyf^HDLNPYM	0-0-0-0-1-0-0-0-0-0-0-0-0-0-0-0-0-0-0-0-0-0-0-0-0-0-0-0-0-0-0-0-0-0-0-0-0-0-0-0-0-0-0-0-0-0-0-0-0-0-0-0			15.4	0	0
120	TDP004	g^IQSTYFHD^lnpym	0-0-0-0-0-0-0-0-0-0-0-0-0-0-0-0-0-0-0-0-0-0-0-0-0-0-0-0-0-0-0-0-0-0-0-0-0-0-0-0-0-0-0-0-0-0-0-1-0-0-0-0			16.9	0	0
121
122
123	TDP005	XXXSLNQA	0-0-0-0-0-1-0-0-0-0-0-0-0-0-0-0-0-0-0-1-0-0-0-0-0-0-0-0-0-0-0-1-0-0-0-1-0-0-0-0-0-0-0-0-0-0-0-0-0-1-0-0			16.9	0	0							XXXSLNQA														XXXSLNQA												XXXSLNQA				XXXSLNQA
124	TDP005	XXSLNQAY	0-0-0-0-0-0-0-0-0-0-0-0-0-0-0-0-0-0-0-0-0-0-0-0-0-0-0-0-0-0-0-0-0-0-0-0-0-0-0-0-0-0-0-0-0-0-0-0-0-0-1-1			16.3	0	0
125	TDP005	XSLNQAYG	0-0-0-0-0-0-0-0-0-0-0-0-0-0-0-0-0-0-0-0-0-0-0-0-0-0-0-0-0-0-0-0-0-0-0-0-0-0-0-0-0-0-0-1-0-0-0-0-0-0-0-1			19.7	0	0
126	TDP005	DMPSVDMX	0-0-0-0-1-0-0-0-0-0-0-0-0-0-0-0-0-0-0-0-0-0-0-0-0-0-0-0-0-0-0-0-0-0-0-0-0-0-0-0-0-0-0-0-0-0-0-0-0-0-0-0			15.2	0	0						DMPSVDMX
127	TDP005	PSVDMXXX	0-0-0-1-1-0-1-0-0-1-0-0-0-0-0-0-0-0-0-0-0-0-0-0-0-0-0-0-0-0-0-0-1-1-0-0-0-0-1-1-0-0-0-0-0-0-0-0-0-0-0-0	1 times in 3 NECs		25.4	15.9	0					PSVDMXXX	PSVDMXXX		PSVDMXXX			PSVDMXXX																							PSVDMXXX	PSVDMXXX					PSVDMXXX	PSVDMXXX
128	--------
129	TDP005	SLNQAYGDMPSVDM	1-1-1-1-1-1-1-1-1-1-1-1-1-1-1-1-1-1-1-1-1-1-1-1-1-1-1-1-1-1-1-1-1-1-1-1-1-1-1-1-1-1-1-1-1-1-1-1-1-1-1-1	3 times in 3 NECs		26.6	23	0
130	TDP005	SLNQAYGDMPSVD^m	0-0-0-1-1-0-1-0-0-1-0-0-0-0-0-0-0-0-0-0-0-0-0-0-0-0-0-0-0-0-0-0-1-1-0-0-0-0-1-1-0-0-0-0-0-0-0-0-0-0-0-0	1 times in 3 NECs		25.4	15.9	0
131	TDP005	sln^QAYGDMPSVDM	0-0-0-0-0-0-0-0-0-0-0-0-0-0-0-0-0-0-0-0-0-0-0-0-0-0-0-0-0-0-0-0-0-0-0-0-0-0-0-0-0-0-0-1-0-0-0-0-0-0-0-1			19.7	0	0
132	TDP005	s^LNQAYGDMPSVDM	0-0-0-0-0-1-0-0-0-0-0-0-0-0-0-0-0-0-0-1-0-0-0-0-0-0-0-0-0-0-0-1-0-0-0-1-0-0-0-0-0-0-0-0-0-0-0-0-0-1-0-0			16.9	0	0
133	TDP005	SLNQAYGDMPS^vdm	0-0-0-0-1-0-0-0-0-0-0-0-0-0-0-0-0-0-0-0-0-0-0-0-0-0-0-0-0-0-0-0-0-0-0-0-0-0-0-0-0-0-0-0-0-0-0-0-0-0-0-0			15.2	0	0
134	TDP005	sl^NQAYGDMPSVDM	0-0-0-0-0-0-0-0-0-0-0-0-0-0-0-0-0-0-0-0-0-0-0-0-0-0-0-0-0-0-0-0-0-0-0-0-0-0-0-0-0-0-0-0-0-0-0-0-0-0-1-1			16.3	0	0
135
136
137	TDP006	RTEHHAMX	0-0-1-0-0-0-0-0-0-0-0-0-0-0-0-0-0-0-0-1-0-0-0-0-0-0-0-0-0-0-0-1-1-0-0-0-0-0-0-0-1-1-0-0-0-0-0-0-0-0-0-0	1 times in 3 NECs		19.7	15.3	0				RTEHHAMX																	RTEHHAMX												RTEHHAMX	RTEHHAMX
138	TDP006	TEHHAMXX	0-0-0-0-0-0-0-0-0-0-0-0-0-0-0-0-0-0-0-0-0-0-0-0-0-0-0-0-0-0-0-0-0-0-0-0-0-0-0-0-0-1-0-0-1-1-1-0-1-0-0-0			22.4	0	0
139	TDP006	FIVFILWR	0-1-2-1-0-0-0-0-0-0-0-0-0-0-0-0-0-0-0-0-0-0-0-0-0-0-0-0-0-0-0-0-0-0-0-0-0-0-0-0-0-0-0-0-0-0-0-0-0-0-0-0			19.7	0	0			FIVFILWR	FIVFILWR	FIVFILWR
140	TDP006	VFILWRTE	0-1-1-1-0-0-0-0-0-0-0-0-0-0-0-0-0-0-0-0-0-0-0-0-0-0-0-0-0-0-0-0-0-0-0-0-0-0-0-0-0-0-0-0-0-0-0-0-0-0-0-0			17.3	0	0			VFILWRTE	VFILWRTE	VFILWRTE
141	--------
142	TDP006	FIVFILWRTEHHAM	1-0-0-0-0-0-0-1-0-0-1-1-0-0-0-0-0-0-0-1-0-0-0-0-0-0-1-0-0-0-0-1-1-1-0-0-0-0-0-1-1-1-1-0-1-0-1-1-1-0-1-1	1 times in 3 NECs		30	27.2	0
143	TDP006	FIVFILWRTEH^ham	0-0-0-0-0-0-0-0-0-0-0-0-0-0-0-0-0-0-0-1-0-0-0-0-0-0-0-0-0-0-0-1-1-0-0-0-0-0-0-0-1-1-0-0-0-0-0-0-0-0-0-0	1 times in 3 NECs		19.2	15.3	0
144	TDP006	FIVFILWRTEHH^am	0-0-0-0-0-0-0-0-0-0-0-0-0-0-0-0-0-0-0-0-0-0-0-0-0-0-0-0-0-0-0-0-0-0-0-0-0-0-0-0-0-1-0-0-1-1-1-0-1-0-0-0			22.4	0	0
145	TDP006	fivf^ILWRTEHHAM	0-1-1-1-0-0-0-0-0-0-0-0-0-0-0-0-0-0-0-0-0-0-0-0-0-0-0-0-0-0-0-0-0-0-0-0-0-0-0-0-0-0-0-0-0-0-0-0-0-0-0-0			19.7	0	0
146	TDP006	fivf^ILWRTEH^ham	0-0-1-0-0-0-0-0-0-0-0-0-0-0-0-0-0-0-0-0-0-0-0-0-0-0-0-0-0-0-0-0-0-0-0-0-0-0-0-0-0-0-0-0-0-0-0-0-0-0-0-0			19.7	0	0
147	TDP006	fivfil^WRTEHHAM	0-1-1-1-0-0-0-0-0-0-0-0-0-0-0-0-0-0-0-0-0-0-0-0-0-0-0-0-0-0-0-0-0-0-0-0-0-0-0-0-0-0-0-0-0-0-0-0-0-0-0-0			17.3	0	0
148
149
150	TDP007	LPAEIMQT	0-0-0-0-0-0-0-0-0-0-0-0-0-0-0-0-0-0-0-0-0-0-0-0-0-0-0-0-0-0-0-0-0-0-0-0-0-0-0-0-0-0-0-0-0-0-1-1-0-0-0-1			17.2	0	0
151	TDP007	PAEIMQTT	0-0-0-1-1-0-0-0-0-0-0-0-0-0-0-0-0-0-0-0-0-0-0-0-0-0-0-0-0-0-0-0-0-0-0-0-0-0-0-0-0-0-1-1-0-0-0-1-0-0-1-0			16.2	0	0					PAEIMQTT	PAEIMQTT
152	TDP007	AEIMQTTQ	0-0-0-0-1-0-0-0-0-0-0-0-0-0-0-0-0-0-0-0-0-0-0-0-0-0-0-0-0-0-0-0-0-0-0-0-0-0-0-0-0-1-0-1-0-0-1-1-0-0-1-1			19.3	0	0						AEIMQTTQ
153	TDP007	EIMQTTQM	0-0-0-0-0-0-0-0-0-1-0-0-0-0-0-0-0-0-0-0-0-0-0-0-0-0-0-0-0-0-0-0-0-0-0-0-0-0-0-0-0-0-1-0-0-0-0-0-0-0-0-0			23.5	0	0											EIMQTTQM
154	TDP007	IMQTTQMX	0-0-0-1-1-0-0-0-0-0-0-0-0-0-0-0-0-0-0-0-0-0-0-0-0-0-0-0-0-0-0-0-0-0-0-0-0-0-0-0-0-0-0-0-0-0-1-0-0-0-0-0			22.8	0	0					IMQTTQMX	IMQTTQMX
155	TDP007	MQTTQMXX	0-0-0-1-1-0-0-0-1-1-0-0-0-1-0-0-0-0-0-0-0-0-0-0-0-0-0-0-0-0-0-0-0-0-0-0-0-0-0-0-1-1-1-0-1-1-2-1-1-1-1-1			26.9	0	0					MQTTQMXX	MQTTQMXX				MQTTQMXX	MQTTQMXX				MQTTQMXX
156	TDP007	QTTQMXXX	0-1-0-0-0-0-1-0-1-0-0-1-1-1-0-0-0-0-0-0-0-0-0-0-0-0-0-0-0-0-0-0-0-0-1-0-0-0-0-0-0-0-0-0-0-0-0-0-0-0-0-0			23.3	0	0			QTTQMXXX					QTTQMXXX		QTTQMXXX			QTTQMXXX	QTTQMXXX	QTTQMXXX																					QTTQMXXX
157	TDP007	XKVHLPAE	0-0-0-0-0-0-0-0-0-0-0-0-0-0-0-0-0-0-0-0-0-0-0-0-0-0-0-0-0-0-0-0-0-0-0-0-0-0-0-0-0-0-0-0-0-0-1-0-0-0-0-0			15.1	0	0
158	--------
159	TDP007	KVHLPAEIMQTTQM	1-1-1-1-1-1-1-1-1-1-1-1-1-1-1-1-1-1-1-1-1-1-1-1-1-1-1-1-1-1-1-1-1-1-1-1-1-1-1-1-1-1-0-1-1-1-1-1-1-1-1-1	3 times in 3 NECs		34.7	33.1	0
160	TDP007	KVHLPAEIMQTT^qm	0-0-0-1-1-0-0-0-1-1-0-0-0-1-0-0-0-0-0-0-0-0-0-0-0-0-0-0-0-0-0-0-0-0-0-0-0-0-0-0-1-1-1-0-1-1-1-1-1-1-1-1			26.9	0	0
161	TDP007	KVHLPAEIMQTTQ^m	0-1-0-0-0-0-1-0-1-0-0-1-1-1-0-0-0-0-0-0-0-0-0-0-0-0-0-0-0-0-0-0-0-0-1-0-0-0-0-0-0-0-0-0-0-0-0-0-0-0-0-0			23.3	0	0
162	TDP007	KVHLPAEIMQT^tqm	0-0-0-1-1-0-0-0-0-0-0-0-0-0-0-0-0-0-0-0-0-0-0-0-0-0-0-0-0-0-0-0-0-0-0-0-0-0-0-0-0-0-0-0-0-0-1-0-0-0-0-0			22.8	0	0
163	TDP007	KVHLPAEIM^qttqm	0-0-0-0-1-0-0-0-0-0-0-0-0-0-0-0-0-0-0-0-0-0-0-0-0-0-0-0-0-0-0-0-0-0-0-0-0-0-0-0-0-1-0-1-0-0-1-1-0-0-1-1			19.3	0	0
164	TDP007	KVHLPAEIMQ^ttqm	0-0-0-0-0-0-0-0-0-1-0-0-0-0-0-0-0-0-0-0-0-0-0-0-0-0-0-0-0-0-0-0-0-0-0-0-0-0-0-0-0-0-1-0-0-0-0-0-0-0-0-0			23.5	0	0
165	TDP007	KVHLPAE^imqttqm	0-0-0-0-0-0-0-0-0-0-0-0-0-0-0-0-0-0-0-0-0-0-0-0-0-0-0-0-0-0-0-0-0-0-0-0-0-0-0-0-0-0-0-0-0-0-1-1-0-0-0-1			17.2	0	0
166	TDP007	KVHLPAEI^mqttqm	0-0-0-1-1-0-0-0-0-0-0-0-0-0-0-0-0-0-0-0-0-0-0-0-0-0-0-0-0-0-0-0-0-0-0-0-0-0-0-0-0-0-1-1-0-0-0-1-0-0-1-0			16.2	0	0
167	TDP007	kvh^LPAEIMQTT^qm	0-0-0-0-0-0-0-0-0-0-0-0-0-0-0-0-0-0-0-0-0-0-0-0-0-0-0-0-0-0-0-0-0-0-0-0-0-0-0-0-0-0-0-0-0-0-1-0-0-0-0-0			15.1	0	0
168
169
170	TDP008	XELFDNRV	0-0-0-0-0-0-0-0-0-0-0-0-0-0-0-0-0-0-0-0-0-0-0-0-0-0-0-0-0-0-0-0-0-0-0-0-0-0-0-0-1-2-0-0-0-0-3-0-1-2-1-1			22.5	0	0
171	TDP008	VGKWSYRM	0-0-1-2-2-0-0-0-0-0-0-0-0-2-0-0-0-0-0-0-0-0-0-0-0-0-0-0-0-0-0-0-0-0-0-0-0-0-0-0-2-4-3-2-2-3-5-4-2-3-4-3			40.7	0	0				VGKWSYRM	VGKWSYRM	VGKWSYRM									VGKWSYRM
172	TDP008	WSYRMXXX	0-0-1-1-2-0-1-0-1-1-1-2-2-3-0-0-0-1-0-0-0-0-0-0-0-0-0-0-0-0-0-0-0-1-2-0-0-0-0-3-0-0-0-0-0-1-2-0-0-1-0-0			47	0	0				WSYRMXXX	WSYRMXXX	WSYRMXXX		WSYRMXXX		WSYRMXXX	WSYRMXXX	WSYRMXXX	WSYRMXXX	WSYRMXXX	WSYRMXXX				WSYRMXXX																WSYRMXXX	WSYRMXXX					WSYRMXXX
173	TDP008	FDNRVGKW	0-0-0-0-0-0-0-0-0-0-0-0-0-0-0-0-0-0-0-0-0-0-0-0-0-0-0-0-0-0-0-0-0-0-0-0-0-0-0-0-0-0-0-0-0-0-0-1-0-0-0-0			19.9	0	0
174	TDP008	NRVGKWSY	0-0-0-0-1-0-0-0-0-0-0-0-0-0-0-0-0-0-0-1-0-0-0-0-0-0-0-0-0-0-0-0-0-0-0-0-0-0-0-0-0-2-1-1-0-1-2-2-0-2-2-2			21.4	0	0						NRVGKWSY															NRVGKWSY
175	TDP008	RVGKWSYR	0-0-0-0-0-0-0-0-0-0-0-0-0-0-0-0-0-0-0-0-0-0-0-0-0-0-0-0-0-0-0-0-0-0-0-0-0-0-0-0-1-2-2-2-0-1-3-3-1-2-2-2			36.6	0	0
176	TDP008	GKWSYRMX	0-0-0-0-0-0-0-0-0-0-0-0-0-1-0-0-0-0-0-0-0-0-0-0-0-0-0-0-0-0-0-0-0-0-0-0-0-0-0-0-1-2-2-0-1-2-2-0-1-1-0-0			26.1	0	0															GKWSYRMX
177	TDP008	KWSYRMXX	0-0-0-0-1-0-0-0-0-0-0-1-2-3-0-0-0-0-0-0-0-0-0-0-0-0-0-0-0-0-0-0-0-0-0-0-0-0-0-0-2-2-0-0-2-2-2-0-2-2-0-0			32.3	0	0						KWSYRMXX							KWSYRMXX	KWSYRMXX	KWSYRMXX
178	TDP008	XXELFDNR	0-0-0-0-0-0-0-1-0-0-1-0-0-0-0-0-0-0-0-0-0-0-0-0-0-0-0-1-0-0-0-1-0-1-1-0-0-0-0-2-0-0-0-0-1-1-1-1-0-0-0-0			19.4	0	0									XXELFDNR			XXELFDNR																	XXELFDNR				XXELFDNR		XXELFDNR	XXELFDNR					XXELFDNR
179	TDP008	XXXELFDN	0-0-0-0-0-0-0-0-0-0-0-0-0-0-0-0-0-0-0-0-1-0-0-0-0-0-0-0-0-0-0-0-0-0-0-0-0-0-0-0-0-1-1-0-0-1-2-2-0-1-1-0			24.8	0	0																						XXXELFDN
180	TDP008	ELFDNRVG	0-0-0-1-1-0-0-0-0-0-0-0-0-0-0-0-0-0-0-0-0-0-0-0-0-0-0-0-0-0-0-0-0-0-0-0-0-0-0-0-0-0-0-0-0-0-0-0-0-0-0-0			15.7	0	0					ELFDNRVG	ELFDNRVG
181	TDP008	LFDNRVGK	0-0-0-0-1-0-0-0-0-0-0-1-1-2-0-0-0-1-0-0-0-0-0-0-0-0-0-0-0-0-0-0-0-0-0-0-0-0-0-0-0-0-0-0-0-0-0-0-1-0-0-0			18.7	0	0						LFDNRVGK							LFDNRVGK	LFDNRVGK	LFDNRVGK				LFDNRVGK
182	--------
183	TDP008	ELFDNRVGKWSYR^m	0-0-1-1-1-0-1-0-1-1-1-2-2-2-0-0-0-1-0-0-0-0-0-0-0-0-0-0-0-0-0-0-0-1-1-0-0-0-0-2-0-0-0-0-0-1-1-0-0-0-0-0			47	0	0
184	TDP008	ELFDNRVGKWSYRM	2-2-2-2-2-2-2-2-2-2-2-2-2-2-2-2-2-2-2-2-2-2-1-1-1-1-2-1-1-2-2-2-2-2-2-1-2-1-2-2-2-2-0-0-2-1-1-0-2-2-1-0	5 times in 3 NECs		35.4	32.8	0
185	TDP008	ELFDNRVGKW^syrm	0-0-1-2-2-0-0-0-0-0-0-0-0-2-0-0-0-0-0-0-0-0-0-0-0-0-0-0-0-0-0-0-0-0-0-0-0-0-0-0-2-2-2-2-2-2-2-2-2-2-2-2			40.7	0	0
186	TDP008	ELFDNRVGK^wsyrm	0-0-0-0-0-0-0-0-0-0-0-0-0-0-0-0-0-0-0-0-0-0-0-0-0-0-0-0-0-0-0-0-0-0-0-0-0-0-0-0-1-2-2-2-0-1-2-2-1-2-2-2			36.6	0	0
187	TDP008	el^FDNRVGKWSYR^m	0-0-0-0-0-0-0-0-0-0-0-0-0-0-0-0-0-0-0-0-0-0-0-0-0-0-0-0-0-0-0-0-0-0-1-0-0-0-0-1-0-0-0-0-0-0-0-0-0-0-0-0			18.9	0	0
188	TDP008	ELFDNRVGKWS^yrm	0-0-0-0-0-0-0-0-0-0-0-0-0-1-0-0-0-0-0-0-0-0-0-0-0-0-0-0-0-0-0-0-0-0-0-0-0-0-0-0-1-2-2-0-1-2-2-0-1-1-0-0			26.1	0	0
189	TDP008	ELFDNRVGKWSY^rm	0-0-0-0-1-0-0-0-0-0-0-1-2-2-0-0-0-0-0-0-0-0-0-0-0-0-0-0-0-0-0-0-0-0-0-0-0-0-0-0-2-2-0-0-2-2-2-0-2-2-0-0			32.3	0	0
190	TDP008	elf^DNRVGKWSYR^m	0-0-0-0-0-0-0-0-0-0-0-0-0-0-0-0-0-0-0-0-0-0-0-0-0-0-0-0-0-0-0-0-0-0-0-0-0-0-0-0-0-0-0-0-0-0-1-0-0-1-0-0			22.5	0	0
191	TDP008	ELFDNRVG^kwsyrm	0-0-0-0-1-0-0-0-0-0-0-0-0-0-0-0-0-0-0-1-0-0-0-0-0-0-0-0-0-0-0-0-0-0-0-0-0-0-0-0-0-2-1-1-0-1-2-2-0-2-2-2			21.4	0	0
192	TDP008	elf^DNRVGKWSYRM	0-0-0-0-0-0-0-0-0-0-0-0-0-0-0-0-0-0-0-0-0-0-0-0-0-0-0-0-0-0-0-0-0-0-0-0-0-0-0-0-1-1-0-0-0-0-1-0-1-1-0-0			20.5	0	0
193	TDP008	el^FDNRVGKWSYRM	0-0-0-0-0-0-0-1-0-0-1-0-0-0-0-0-0-0-0-0-0-0-0-0-0-0-0-1-0-0-0-1-0-1-0-0-0-0-0-1-0-0-0-0-1-1-0-0-0-0-0-0			19.4	0	0
194	TDP008	elfdn^RVGKWSYR^m	0-0-0-0-1-0-0-0-0-0-0-0-0-1-0-0-0-0-0-0-0-0-0-0-0-0-0-0-0-0-0-0-0-0-0-0-0-0-0-0-0-0-0-0-0-0-0-0-0-0-0-0			17.4	0	0
195	TDP008	elfdn^RVGKWSYRM	0-0-0-0-0-0-0-0-0-0-0-1-1-0-0-0-0-1-0-0-0-0-0-0-0-0-0-0-0-0-0-0-0-0-0-0-0-0-0-0-0-0-0-0-0-0-0-0-1-0-0-0			17.1	0	0
196	TDP008	e^LFDNRVGKWSYRM	0-0-0-0-0-0-0-0-0-0-0-0-0-0-0-0-0-0-0-0-1-0-0-0-0-0-0-0-0-0-0-0-0-0-0-0-0-0-0-0-0-0-0-0-0-0-0-0-0-0-0-0			15.7	0	0
197	TDP008	e^LFDNRVGKW^syrm	0-0-0-0-0-0-0-0-0-0-0-0-0-0-0-0-0-0-0-0-0-0-0-0-0-0-0-0-0-0-0-0-0-0-0-0-0-0-0-0-0-1-1-0-0-1-1-1-0-1-1-0			24.8	0	0
198	TDP008	ELFDNR^vgkwsyrm	0-0-0-0-0-0-0-0-0-0-0-0-0-0-0-0-0-0-0-0-0-0-0-0-0-0-0-0-0-0-0-0-0-0-0-0-0-0-0-0-0-0-0-0-0-0-0-1-0-0-0-0			19.9	0	0
199	TDP008	e^LFDNRVGK^wsyrm	0-0-0-0-0-0-0-0-0-0-0-0-0-0-0-0-0-0-0-0-0-0-0-0-0-0-0-0-0-0-0-0-0-0-0-0-0-0-0-0-0-0-0-0-0-0-1-1-0-0-0-0			22.1	0	0
200	TDP008	elfd^NRVGKWSYRM	0-0-0-1-1-0-0-0-0-0-0-0-0-0-0-0-0-0-0-0-0-0-0-0-0-0-0-0-0-0-0-0-0-0-0-0-0-0-0-0-0-0-0-0-0-0-0-0-0-0-0-0			15.7	0	0
201	TDP008	el^FDNRVGKW^syrm	0-0-0-0-0-0-0-0-0-0-0-0-0-0-0-0-0-0-0-0-0-0-0-0-0-0-0-0-0-0-0-0-0-0-0-0-0-0-0-0-0-0-0-0-0-0-1-1-0-0-0-0			16.4	0	0
202	TDP008	elf^DNRVGKW^syrm	0-0-0-0-0-0-0-0-0-0-0-0-0-0-0-0-0-0-0-0-0-0-0-0-0-0-0-0-0-0-0-0-0-0-0-0-0-0-0-0-0-1-0-0-0-0-1-0-0-0-1-1			18.9	0	0
203	TDP008	elfdn^RVGKWSY^rm	0-0-0-0-0-0-0-0-0-0-0-0-0-1-0-0-0-0-0-0-0-0-0-0-0-0-0-0-0-0-0-0-0-0-0-0-0-0-0-0-0-0-0-0-0-0-0-0-0-0-0-0			18.7	0	0
204
205
206	TDP009	SEDWAFKP	0-1-1-1-1-0-1-0-1-1-0-0-1-0-0-1-1-1-0-0-0-0-0-0-0-0-0-0-0-0-0-1-1-1-1-1-1-1-1-1-1-1-1-2-0-1-1-1-1-1-1-2	3 times in 3 NECs		23	20.4	0			SEDWAFKP	SEDWAFKP	SEDWAFKP	SEDWAFKP		SEDWAFKP		SEDWAFKP	SEDWAFKP			SEDWAFKP			SEDWAFKP	SEDWAFKP	SEDWAFKP														SEDWAFKP	SEDWAFKP	SEDWAFKP	SEDWAFKP	SEDWAFKP	SEDWAFKP	SEDWAFKP	SEDWAFKP	SEDWAFKP
207	TDP009	PTGPMXXX	0-0-1-2-1-0-1-0-0-1-0-0-1-1-0-0-1-1-0-0-0-0-0-0-0-0-0-0-0-0-0-0-0-0-0-0-0-0-0-0-0-0-1-2-0-1-1-1-0-0-1-3			27.8	0	0				PTGPMXXX	PTGPMXXX	PTGPMXXX		PTGPMXXX			PTGPMXXX			PTGPMXXX	PTGPMXXX			PTGPMXXX	PTGPMXXX
208	TDP009	NLSEDWAF	0-0-0-0-0-0-0-0-0-0-0-0-0-0-0-0-0-0-0-0-0-0-0-0-0-0-0-0-0-0-0-0-0-0-0-0-0-0-0-0-0-1-1-1-0-1-1-1-0-0-0-1			26.5	0	0
209	TDP009	XNLSEDWA	0-0-0-0-0-0-0-0-0-0-0-0-0-0-0-0-0-0-0-0-0-0-0-0-0-0-0-0-0-0-0-0-0-0-0-0-0-0-0-1-0-1-1-1-0-0-0-1-0-1-0-1			25.6	0	0																																									XNLSEDWA
210	TDP009	EDWAFKPT	0-0-0-0-0-0-0-0-0-0-0-0-0-0-0-0-0-0-0-0-0-0-0-0-0-0-0-0-0-0-0-0-0-0-0-0-0-0-0-1-0-0-1-1-0-0-0-1-0-0-0-0			18.6	0	0																																									EDWAFKPT
211	TDP009	XXXNLSED	0-1-0-0-0-0-0-1-0-0-1-1-0-1-0-1-1-0-1-1-1-1-0-0-0-0-0-0-1-0-0-0-0-0-1-1-0-1-1-0-1-0-1-1-1-1-1-0-1-0-0-0	3 times in 3 NECs		32	27	0			XXXNLSED						XXXNLSED			XXXNLSED	XXXNLSED		XXXNLSED		XXXNLSED	XXXNLSED		XXXNLSED	XXXNLSED	XXXNLSED	XXXNLSED							XXXNLSED						XXXNLSED	XXXNLSED		XXXNLSED	XXXNLSED
212	TDP009	AFKPTGPM	0-0-0-0-0-0-0-0-0-0-0-0-0-0-0-0-0-0-0-0-0-0-0-0-0-0-0-0-0-0-0-0-0-0-0-0-0-0-0-0-0-0-0-0-0-0-0-0-0-0-0-1			18.3	0	0
213	TDP009	FKPTGPMX	0-0-0-0-0-0-0-0-0-0-0-0-0-0-0-0-0-0-0-0-0-0-0-0-0-0-0-0-0-0-0-0-0-0-0-0-0-0-0-0-0-1-0-1-0-0-0-1-0-0-1-2			20.8	0	0
214	TDP009	XXNLSEDW	0-1-0-0-0-0-0-0-0-0-0-0-0-0-0-0-1-0-0-0-0-0-0-0-0-0-0-0-0-0-0-0-0-0-0-0-0-0-0-1-1-0-1-1-1-1-1-1-1-0-1-2			36.6	0	0			XXNLSEDW															XXNLSEDW																							XXNLSEDW
215	TDP009	LSEDWAFK	1-1-1-2-2-1-1-1-0-1-1-1-1-1-1-0-1-1-1-1-1-1-1-1-0-0-1-1-1-1-1-0-0-0-1-1-1-1-0-1-1-1-1-0-1-1-1-2-1-1-1-2	3 times in 3 NECs		26.5	23.9	0		LSEDWAFK	LSEDWAFK	LSEDWAFK	LSEDWAFK	LSEDWAFK	LSEDWAFK	LSEDWAFK	LSEDWAFK		LSEDWAFK	LSEDWAFK	LSEDWAFK	LSEDWAFK	LSEDWAFK	LSEDWAFK		LSEDWAFK	LSEDWAFK	LSEDWAFK	LSEDWAFK	LSEDWAFK	LSEDWAFK	LSEDWAFK	LSEDWAFK			LSEDWAFK	LSEDWAFK	LSEDWAFK	LSEDWAFK	LSEDWAFK				LSEDWAFK	LSEDWAFK	LSEDWAFK	LSEDWAFK		LSEDWAFK
216	--------
217	TDP009	NLSEDWAFKPTGPM	1-1-1-1-1-1-1-1-1-1-1-1-1-1-1-1-1-1-1-1-1-1-1-1-1-1-1-1-1-1-1-1-1-1-1-1-1-1-1-1-1-1-1-1-1-1-1-1-1-1-1-1	3 times in 3 NECs		36.8	34.8	0
218	TDP009	n^LSEDWAFKPTGPM	0-1-0-0-0-0-0-1-0-0-1-1-0-1-0-1-1-0-1-1-1-1-0-0-0-0-0-0-1-0-0-0-0-0-1-1-0-1-1-0-1-0-1-1-1-1-1-0-1-0-0-0	3 times in 3 NECs		32	27	0
219	TDP009	nl^SEDWAFKPTGPM	0-1-0-0-0-0-0-0-0-0-0-0-0-0-0-0-1-0-0-0-0-0-0-0-0-0-0-0-0-0-0-0-0-0-0-0-0-0-0-1-1-0-1-1-1-1-1-1-1-0-1-1			36.6	0	0
220	TDP009	NLSEDWAFKPTGP^m	0-0-1-1-0-0-1-0-0-1-0-0-1-1-0-0-1-1-0-0-0-0-0-0-0-0-0-0-0-0-0-0-0-0-0-0-0-0-0-0-0-0-1-1-0-1-1-0-0-0-1-1			27.8	0	0
221	TDP009	nls^EDWAFKPTGPM	0-0-0-0-0-0-0-0-0-0-0-0-0-0-0-0-0-0-0-0-0-0-0-0-0-0-0-0-0-0-0-0-0-0-0-0-0-0-0-1-0-1-1-1-0-0-0-1-0-1-0-1			25.6	0	0
222	TDP009	nlsedw^AFKPTGPM	0-1-1-1-1-0-1-0-1-1-0-0-1-0-0-1-1-1-0-0-0-0-0-0-0-0-0-0-0-0-0-1-1-1-1-1-1-1-1-1-1-1-1-1-0-1-1-1-1-1-1-1	3 times in 3 NECs		23	20.4	0
223	TDP009	nlse^DWAFKPTGPM	0-0-0-0-0-0-0-0-0-0-0-0-0-0-0-0-0-0-0-0-0-0-0-0-0-0-0-0-0-0-0-0-0-0-0-0-0-0-0-0-0-1-1-1-0-1-1-1-0-0-0-1			26.5	0	0
224	TDP009	nlsed^WAFKPTGPM	1-1-1-1-1-1-1-1-0-1-1-1-1-1-1-0-1-1-1-1-1-1-1-1-0-0-1-1-1-1-1-0-0-0-1-1-1-1-0-1-1-1-1-0-1-1-1-1-1-1-1-1	3 times in 3 NECs		26.5	23.9	0
225	TDP009	nlsedwa^FKPTGPM	0-0-0-0-0-0-0-0-0-0-0-0-0-0-0-0-0-0-0-0-0-0-0-0-0-0-0-0-0-0-0-0-0-0-0-0-0-0-0-1-0-0-1-1-0-0-0-1-0-0-0-0			18.6	0	0
226	TDP009	NLSEDWAFKPT^gpm	0-0-0-0-0-0-0-0-0-0-0-0-0-0-0-0-0-0-0-0-0-0-0-0-0-0-0-0-0-0-0-0-0-0-0-0-0-0-0-0-0-1-0-1-0-0-0-1-0-0-1-1			20.8	0	0
227	TDP009	nlsedw^AFKPTGP^m	0-0-0-0-0-0-0-0-0-0-0-0-0-0-0-0-0-0-0-0-0-0-0-0-0-0-0-0-0-0-0-0-0-0-0-0-0-0-0-0-0-0-0-1-0-0-0-0-0-0-0-1			19.2	0	0
228	TDP009	NLSEDWAFKP^tgpm	0-0-0-0-0-0-0-0-0-0-0-0-0-0-0-0-0-0-0-0-0-0-0-0-0-0-0-0-0-0-0-0-0-0-0-0-0-0-0-0-0-0-0-0-0-0-0-0-0-0-0-1			18.3	0	0
229	TDP009	nlsed^WAFKPTGP^m	0-0-0-1-1-0-0-0-0-0-0-0-0-0-0-0-0-0-0-0-0-0-0-0-0-0-0-0-0-0-0-0-0-0-0-0-0-0-0-0-0-0-0-0-0-0-0-1-0-0-0-1			21	0	0
230	TDP009	nl^SEDWAFKPT^gpm	0-0-0-0-0-0-0-0-0-0-0-0-0-0-0-0-0-0-0-0-0-0-0-0-0-0-0-0-0-0-0-0-0-0-0-0-0-0-0-0-0-0-0-0-0-0-0-0-0-0-0-1			18.4	0	0
231
232
233	TDP010	LQVHMRYI	0-0-1-1-1-0-0-0-0-0-0-0-1-1-0-0-0-1-0-0-0-0-0-0-0-0-0-0-0-0-0-0-0-0-0-0-0-0-0-0-1-1-1-0-0-1-1-0-0-1-1-0			24	0	0				LQVHMRYI	LQVHMRYI	LQVHMRYI								LQVHMRYI	LQVHMRYI				LQVHMRYI
234	TDP010	QVHMRYIN	0-0-0-1-1-0-0-0-0-0-0-0-0-0-0-0-0-0-0-0-0-0-0-0-0-0-0-0-0-0-0-0-0-0-0-0-0-0-0-0-1-1-0-0-1-1-1-0-0-1-1-0			21.6	0	0					QVHMRYIN	QVHMRYIN
235	TDP010	VHMRYINV	0-0-0-0-0-0-0-0-0-0-0-0-0-0-0-0-0-0-0-0-0-0-0-0-0-0-0-0-0-0-0-0-0-0-0-0-0-0-0-0-1-1-0-0-1-1-1-0-1-1-1-0			31.2	0	0
236	TDP010	HMRYINVM	0-0-0-0-0-0-0-0-0-0-0-0-0-0-0-0-0-0-0-0-0-0-0-0-0-0-0-0-0-0-0-0-0-0-0-0-0-0-0-0-0-1-0-0-0-1-0-0-0-0-0-0			24.8	0	0
237	TDP010	MRYINVMX	0-0-0-0-0-0-0-0-0-0-0-0-0-0-0-0-0-0-0-0-0-0-0-0-0-0-0-0-0-0-0-0-0-0-0-0-0-0-0-0-0-0-0-0-0-0-1-0-0-2-1-0			23.5	0	0
238	TDP010	RYINVMXX	0-0-0-0-0-0-0-0-0-0-0-0-0-0-0-0-0-0-0-0-0-0-0-0-0-0-0-0-0-0-0-0-0-0-0-0-0-0-0-0-1-1-0-0-1-1-0-0-0-0-0-0			25.1	0	0
239	TDP010	XHIGLQVH	0-0-0-0-0-0-0-0-0-0-0-0-0-0-0-0-0-0-0-0-0-0-0-0-0-0-0-0-0-0-0-0-0-0-0-0-0-0-0-0-0-0-0-0-0-1-0-0-0-2-0-0			17.3	0	0
240	TDP010	HIGLQVHM	0-0-0-0-0-0-0-0-0-0-0-0-0-0-0-0-0-0-0-0-0-0-0-0-0-0-0-0-0-0-0-0-0-0-0-0-0-0-0-0-0-0-0-0-0-0-1-0-0-0-1-0			23.5	0	0
241	TDP010	IGLQVHMR	0-0-0-0-0-0-0-0-0-0-0-0-0-0-0-0-0-0-0-0-0-0-0-0-0-0-0-0-0-0-0-0-0-0-0-0-0-0-0-0-0-0-0-0-0-0-0-0-0-1-0-0			16	0	0
242	--------
243	TDP010	HIGLQVHMRYINVM	0-1-1-1-0-0-1-1-1-0-1-1-0-0-1-1-0-0-1-1-1-0-0-1-0-0-1-0-0-0-0-1-1-1-1-1-1-0-1-1-1-1-1-0-1-1-1-1-1-1-1-1	2 times in 3 NECs		29	28.6	0
244	TDP010	HIGLQVHMR^yinvm	0-0-0-0-0-0-0-0-0-0-0-0-0-0-0-0-0-0-0-0-0-0-0-0-0-0-0-0-0-0-0-0-0-0-0-0-0-0-0-0-1-1-0-0-1-1-1-0-1-1-1-0			31.2	0	0
245	TDP010	HIGLQVHMRYIN^vm	0-0-0-0-0-0-0-0-0-0-0-0-0-0-0-0-0-0-0-0-0-0-0-0-0-0-0-0-0-0-0-0-0-0-0-0-0-0-0-0-1-1-0-0-1-1-0-0-0-0-0-0			25.1	0	0
246	TDP010	HIGLQVH^mryinvm	0-0-1-1-1-0-0-0-0-0-0-0-1-1-0-0-0-1-0-0-0-0-0-0-0-0-0-0-0-0-0-0-0-0-0-0-0-0-0-0-1-1-1-0-0-1-1-0-0-1-1-0			24	0	0
247	TDP010	HIGLQVHMRY^invm	0-0-0-0-0-0-0-0-0-0-0-0-0-0-0-0-0-0-0-0-0-0-0-0-0-0-0-0-0-0-0-0-0-0-0-0-0-0-0-0-0-1-0-0-0-1-0-0-0-0-0-0			24.8	0	0
248	TDP010	HIGLQVHM^ryinvm	0-0-0-1-1-0-0-0-0-0-0-0-0-0-0-0-0-0-0-0-0-0-0-0-0-0-0-0-0-0-0-0-0-0-0-0-0-0-0-0-1-1-0-0-1-1-1-0-0-1-1-0			21.6	0	0
249	TDP010	HIGLQVHMRYI^nvm	0-0-0-0-0-0-0-0-0-0-0-0-0-0-0-0-0-0-0-0-0-0-0-0-0-0-0-0-0-0-0-0-0-0-0-0-0-0-0-0-0-0-0-0-0-0-0-0-0-1-0-0			21.6	0	0
250	TDP010	higl^QVHMRYI^nvm	0-0-0-0-0-0-0-0-0-0-0-0-0-0-0-0-0-0-0-0-0-0-0-0-0-0-0-0-0-0-0-0-0-0-0-0-0-0-0-0-0-0-0-0-0-0-1-0-0-0-1-0			23.5	0	0
251	TDP010	hig^LQVHMRYI^nvm	0-0-0-0-0-0-0-0-0-0-0-0-0-0-0-0-0-0-0-0-0-0-0-0-0-0-0-0-0-0-0-0-0-0-0-0-0-0-0-0-0-0-0-0-0-0-0-0-0-1-0-0			15.2	0	0
252	TDP010	hig^LQVHMRYINVM	0-0-0-0-0-0-0-0-0-0-0-0-0-0-0-0-0-0-0-0-0-0-0-0-0-0-0-0-0-0-0-0-0-0-0-0-0-0-0-0-0-0-0-0-0-1-0-0-0-1-0-0			17.3	0	0
253	TDP010	higlq^VHMRYINVM	0-0-0-0-0-0-0-0-0-0-0-0-0-0-0-0-0-0-0-0-0-0-0-0-0-0-0-0-0-0-0-0-0-0-0-0-0-0-0-0-0-0-0-0-0-0-0-0-0-1-0-0			16	0	0
254
255
256	TDP011	VIWTHNAG	0-0-0-0-0-0-0-0-0-0-0-0-0-0-0-0-0-0-0-0-0-0-0-0-0-0-0-0-0-0-0-0-0-0-0-0-0-0-0-0-1-1-0-0-0-0-0-0-1-1-0-0			17.9	0	0
257	TDP011	IWTHNAGM	0-0-0-0-0-0-0-0-0-0-0-0-0-0-0-0-0-0-0-0-0-1-0-0-0-0-0-0-0-0-0-0-0-0-0-0-0-0-0-0-1-1-0-0-1-1-1-1-1-1-0-0			22.5	0	0																							IWTHNAGM
258	TDP011	WTHNAGMS	0-0-0-0-0-0-0-0-0-0-0-0-0-1-0-0-0-1-0-0-0-0-0-0-0-0-0-0-0-0-0-0-0-0-0-0-0-0-0-0-0-0-0-0-0-0-1-0-0-0-0-0			18.5	0	0															WTHNAGMS				WTHNAGMS
259	TDP011	THNAGMSF	0-0-0-0-0-0-0-0-0-0-0-0-0-0-0-0-0-0-0-0-0-0-0-0-0-0-0-0-0-0-0-0-0-0-0-0-0-0-0-0-1-1-0-0-1-1-1-1-1-1-0-0			22	0	0
260	TDP011	HNAGMSFM	0-0-0-1-1-0-0-0-0-0-0-0-1-1-0-0-0-0-0-0-0-0-0-0-0-0-0-0-0-0-0-0-0-0-0-0-0-0-0-0-0-0-0-0-0-1-1-1-0-0-0-0			20.3	0	0					HNAGMSFM	HNAGMSFM								HNAGMSFM	HNAGMSFM
261	TDP011	NAGMSFMM	0-0-0-0-0-0-0-0-0-0-0-0-0-1-0-0-0-0-0-0-0-0-0-0-0-0-0-0-0-0-0-0-0-0-0-0-0-0-0-0-0-1-0-0-0-1-1-0-0-1-0-0			26.4	0	0															NAGMSFMM
262	TDP011	AGMSFMMX	0-0-1-1-1-0-0-0-0-1-0-0-0-1-0-0-0-0-0-0-0-0-0-0-0-0-0-0-0-0-0-0-0-0-0-0-0-0-0-0-0-1-0-0-0-1-1-0-0-1-0-0			27.5	0	0				AGMSFMMX	AGMSFMMX	AGMSFMMX					AGMSFMMX				AGMSFMMX
263	TDP011	GMSFMMXX	1-1-1-1-2-1-1-1-1-1-0-1-1-1-0-0-0-0-0-0-0-0-0-0-0-0-0-0-0-0-0-0-0-0-0-0-0-0-0-0-2-3-1-1-1-2-2-1-1-3-3-1			31.5	0	0		GMSFMMXX	GMSFMMXX	GMSFMMXX	GMSFMMXX	GMSFMMXX	GMSFMMXX	GMSFMMXX	GMSFMMXX	GMSFMMXX	GMSFMMXX		GMSFMMXX	GMSFMMXX	GMSFMMXX
264	TDP011	MSFMMXXX	0-1-0-1-1-0-0-0-1-1-0-0-1-1-0-1-1-2-0-0-0-0-0-0-0-0-0-0-0-0-0-0-0-0-0-0-0-0-0-0-0-0-0-0-0-0-0-0-0-0-1-0			25	0	0			MSFMMXXX		MSFMMXXX	MSFMMXXX				MSFMMXXX	MSFMMXXX			MSFMMXXX	MSFMMXXX		MSFMMXXX	MSFMMXXX	MSFMMXXX
265	TDP011	PVIWTHNA	0-0-0-0-1-0-0-0-0-0-0-0-0-0-0-0-0-0-0-0-0-0-0-0-0-0-0-0-0-0-0-0-0-0-0-0-0-0-0-0-1-2-1-2-1-1-2-1-1-2-3-2			20.9	0	0						PVIWTHNA
266	TDP011	XXXPVIWT	0-0-0-0-0-0-0-0-0-0-0-0-0-0-1-0-0-1-0-0-0-0-0-0-0-0-0-0-0-0-0-0-1-0-0-0-0-0-0-0-2-1-0-0-1-1-0-0-1-1-1-0	1 times in 3 NECs		19.2	18.4	0																XXXPVIWT			XXXPVIWT															XXXPVIWT
267	--------
268	TDP011	PVIWTHNAGMSF^mm	1-1-1-1-1-1-1-1-1-1-0-1-1-1-0-0-0-0-0-0-0-0-0-0-0-0-0-0-0-0-0-0-0-0-0-0-0-0-0-0-1-1-0-0-1-1-1-0-1-1-1-0			31.5	0	0
269	TDP011	PVIWTHNAGMS^fmm	0-0-1-1-1-0-0-0-0-1-0-0-0-1-0-0-0-0-0-0-0-0-0-0-0-0-0-0-0-0-0-0-0-0-0-0-0-0-0-0-0-1-0-0-0-1-1-0-0-1-0-0			27.5	0	0
270	TDP011	PVIWTHNAGMSFM^m	0-1-0-1-1-0-0-0-1-1-0-0-1-1-0-1-1-1-0-0-0-0-0-0-0-0-0-0-0-0-0-0-0-0-0-0-0-0-0-0-0-0-0-0-0-0-0-0-0-0-0-0			25	0	0
271	TDP011	PVIWTHNAGMSFMM	1-1-1-1-0-1-1-1-0-0-1-1-1-1-1-1-0-1-1-0-1-1-1-1-1-1-1-1-1-1-1-1-1-1-1-1-1-1-1-1-1-1-0-1-1-1-1-0-1-1-1-1	3 times in 3 NECs		30	26	0
272	TDP011	PVIWTH^nagmsfmm	0-0-0-0-0-0-0-0-0-0-0-0-0-0-0-0-0-0-0-0-0-1-0-0-0-0-0-0-0-0-0-0-0-0-0-0-0-0-0-0-1-1-0-0-1-1-1-1-1-1-0-0			22.5	0	0
273	TDP011	pviwt^HNAGMSFMM	0-0-0-0-0-0-0-0-0-0-0-0-0-0-0-0-0-0-0-0-0-0-0-0-0-0-0-0-0-0-0-0-0-0-0-0-0-0-0-0-1-1-0-0-0-0-0-0-1-1-0-0			17.9	0	0
274	TDP011	PVIWTHNAG^msfmm	0-0-0-1-1-0-0-0-0-0-0-0-1-1-0-0-0-0-0-0-0-0-0-0-0-0-0-0-0-0-0-0-0-0-0-0-0-0-0-0-0-0-0-0-0-1-1-1-0-0-0-0			20.3	0	0
275	TDP011	pviw^THNAGMSFMM	0-0-0-0-0-0-0-0-0-0-0-0-0-0-0-0-0-0-0-0-0-0-0-0-0-0-0-0-0-0-0-0-0-0-0-0-0-0-0-0-1-1-0-1-1-1-1-0-1-1-1-1			18.2	0	0
276	TDP011	PVIWTHNA^gmsfmm	0-0-0-0-0-0-0-0-0-0-0-0-0-0-0-0-0-0-0-0-0-0-0-0-0-0-0-0-0-0-0-0-0-0-0-0-0-0-0-0-1-1-0-0-1-1-1-1-1-1-0-0			22	0	0
277	TDP011	PVIWTHNAGM^sfmm	0-0-0-0-0-0-0-0-0-0-0-0-0-1-0-0-0-0-0-0-0-0-0-0-0-0-0-0-0-0-0-0-0-0-0-0-0-0-0-0-0-1-0-0-0-1-1-0-0-1-0-0			26.4	0	0
278	TDP011	pviw^THNAGMSF^mm	0-0-0-0-1-0-0-0-0-0-0-0-0-0-0-0-0-0-0-0-0-0-0-0-0-0-0-0-0-0-0-0-0-0-0-0-0-0-0-0-0-1-1-1-0-0-1-1-0-1-1-1			20.9	0	0
279	TDP011	p^VIWTHNAGMSFMM	0-0-0-0-0-0-0-0-0-0-0-0-0-0-1-0-0-0-0-0-0-0-0-0-0-0-0-0-0-0-0-0-1-0-0-0-0-0-0-0-1-0-0-0-1-0-0-0-1-0-0-0	1 times in 3 NECs		19.2	18.4	0
280	TDP011	PVIWTHN^agmsfmm	0-0-0-0-0-0-0-0-0-0-0-0-0-1-0-0-0-1-0-0-0-0-0-0-0-0-0-0-0-0-0-0-0-0-0-0-0-0-0-0-0-0-0-0-0-0-1-0-0-0-0-0			18.5	0	0
281	TDP011	p^VIWTHNAGMSFM^m	0-0-0-0-0-0-0-0-0-0-0-0-0-0-0-0-0-1-0-0-0-0-0-0-0-0-0-0-0-0-0-0-0-0-0-0-0-0-0-0-0-0-0-0-0-0-0-0-0-0-0-0			17.9	0	0
282	TDP011	p^VIWTHNAGMSF^mm	0-0-0-0-0-0-0-0-0-0-0-0-0-0-0-0-0-0-0-0-0-0-0-0-0-0-0-0-0-0-0-0-0-0-0-0-0-0-0-0-1-1-0-0-0-1-0-0-0-1-1-0			18.1	0	0
283	TDP011	pviw^THNAGMSFM^m	0-0-0-0-0-0-0-0-0-0-0-0-0-0-0-0-0-0-0-0-0-0-0-0-0-0-0-0-0-0-0-0-0-0-0-0-0-0-0-0-0-0-0-0-0-0-0-0-0-0-1-0			15.7	0	0
284
285
286	TDP012	MFLREKQY	0-0-0-0-0-0-0-0-0-0-0-0-0-0-0-0-0-0-0-0-0-1-0-0-0-0-0-0-0-0-0-0-0-0-1-0-0-0-0-1-1-2-2-0-1-1-2-1-1-2-2-0			19.9	0	0																							MFLREKQY													MFLREKQY					MFLREKQY
287	TDP012	XXVMFLRE	0-0-0-0-0-0-0-0-0-0-0-0-0-0-0-0-0-0-0-0-0-0-0-0-0-0-0-0-0-0-0-0-0-0-0-0-0-0-0-1-1-1-1-0-0-0-2-1-1-2-1-0			27.3	0	0																																									XXVMFLRE
288	TDP012	YDPVSLXX	0-0-0-0-0-0-0-0-0-0-0-0-0-0-0-0-0-0-0-0-0-0-0-0-0-0-0-0-0-0-0-0-0-0-0-0-0-0-0-0-1-3-3-2-0-0-4-3-1-3-3-2			27.3	0	0
289	TDP012	FLREKQYD	0-0-0-1-1-0-0-0-0-0-0-0-0-0-0-0-0-0-0-0-0-0-0-0-0-0-0-0-0-0-0-0-0-0-0-0-0-0-0-0-0-1-1-0-0-0-1-0-0-1-0-0			18.4	0	0					FLREKQYD	FLREKQYD
290	TDP012	XXXVMFLR	0-0-0-0-0-0-0-0-0-0-1-1-0-0-0-0-0-0-0-0-0-0-0-0-0-0-0-0-0-0-0-0-0-0-0-0-0-0-0-1-0-1-0-0-1-1-1-0-0-0-0-0			24.3	0	0												XXXVMFLR	XXXVMFLR																												XXXVMFLR
291	TDP012	XVMFLREK	1-1-1-1-1-0-0-0-0-0-0-0-1-0-0-0-1-0-0-0-0-0-0-0-0-0-0-0-0-0-0-0-0-0-0-0-0-0-0-0-2-1-2-1-0-1-2-1-1-2-2-1			29.3	0	0		XVMFLREK	XVMFLREK	XVMFLREK	XVMFLREK	XVMFLREK								XVMFLREK				XVMFLREK
292	TDP012	VMFLREKQ	1-1-1-1-1-0-0-0-0-0-0-0-0-0-0-0-0-0-0-0-0-0-0-0-0-0-0-0-0-0-0-0-0-0-0-0-0-0-0-0-1-2-2-1-1-1-2-2-1-1-2-2			30.9	0	0		VMFLREKQ	VMFLREKQ	VMFLREKQ	VMFLREKQ	VMFLREKQ
293	TDP012	LREKQYDP	0-0-0-0-0-0-0-0-0-0-0-0-0-0-0-0-0-0-0-0-0-0-0-0-0-0-0-0-0-0-0-0-0-0-0-0-0-0-0-0-1-1-0-0-0-1-1-0-0-0-0-0			19.9	0	0
294	TDP012	REKQYDPV	0-0-0-0-0-0-0-0-0-0-0-0-0-0-0-0-0-0-0-0-0-0-0-0-0-0-0-0-0-0-0-0-0-0-0-0-0-0-0-0-1-1-0-0-0-1-1-1-1-1-0-0			21.5	0	0
295	TDP012	EKQYDPVS	0-0-0-0-0-0-0-0-0-0-0-0-0-0-0-0-0-0-0-0-0-0-0-0-0-0-0-0-0-0-0-0-0-0-0-0-0-0-0-0-1-1-0-0-1-1-1-0-0-0-0-0			26.5	0	0
296	TDP012	KQYDPVSL	1-1-1-1-0-1-1-1-0-1-1-1-1-1-1-1-1-1-1-1-1-1-1-0-1-1-1-0-1-1-1-1-1-1-1-1-1-1-1-1-1-1-0-0-1-1-1-0-1-1-0-0	3 times in 3 NECs		30.1	21.2	0		KQYDPVSL	KQYDPVSL	KQYDPVSL	KQYDPVSL		KQYDPVSL	KQYDPVSL	KQYDPVSL		KQYDPVSL	KQYDPVSL	KQYDPVSL	KQYDPVSL	KQYDPVSL	KQYDPVSL	KQYDPVSL	KQYDPVSL	KQYDPVSL	KQYDPVSL	KQYDPVSL	KQYDPVSL	KQYDPVSL	KQYDPVSL		KQYDPVSL	KQYDPVSL	KQYDPVSL		KQYDPVSL	KQYDPVSL	KQYDPVSL	KQYDPVSL	KQYDPVSL	KQYDPVSL	KQYDPVSL	KQYDPVSL	KQYDPVSL	KQYDPVSL	KQYDPVSL	KQYDPVSL
297	TDP012	QYDPVSLX	0-0-0-0-0-0-0-0-0-0-0-0-0-0-0-0-0-0-0-0-0-0-0-0-0-0-0-0-0-0-0-0-0-0-0-0-0-0-0-0-0-0-0-0-0-0-1-0-0-1-0-0			22.8	0	0
298	TDP012	DPVSLXXX	0-0-0-0-0-0-0-0-0-0-0-0-1-1-0-0-0-0-0-0-0-0-0-0-0-0-0-0-0-0-0-0-0-0-1-0-0-0-1-1-0-0-0-0-0-0-1-0-0-0-0-0			27.8	0	0														DPVSLXXX	DPVSLXXX																					DPVSLXXX				DPVSLXXX	DPVSLXXX
299	--------
300	TDP012	VMFLREKQYDPVSL	1-1-1-1-1-1-1-1-1-1-1-1-1-1-1-1-1-1-1-1-1-1-1-1-1-1-1-1-1-1-1-1-1-1-1-1-1-1-1-1-1-1-0-0-1-1-1-0-1-1-0-0	3 times in 3 NECs		32.3	30.3	0
301	TDP012	VMFLREKQYD^pvsl	1-1-1-1-0-1-1-1-0-1-1-1-1-1-1-1-1-1-1-1-1-1-1-0-1-1-1-0-1-1-1-1-1-1-1-1-1-1-1-1-1-1-0-0-1-1-1-0-1-1-0-0	3 times in 3 NECs		30.1	21.2	0
302	TDP012	vmflr^EKQYDPVSL	0-0-0-0-0-0-0-0-0-0-0-0-0-0-0-0-0-0-0-0-0-0-0-0-0-0-0-0-0-0-0-0-0-0-0-0-0-0-0-0-0-1-1-0-0-0-1-0-0-1-1-0			19.9	0	0
303	TDP012	VMFLREKQYDPVS^l	0-0-0-0-0-0-0-0-0-0-0-0-1-1-0-0-0-0-0-0-0-0-0-0-0-0-0-0-0-0-0-0-0-0-1-0-0-0-1-1-0-0-0-0-0-0-1-0-0-0-0-0			27.8	0	0
304	TDP012	VMFLREKQYDPV^sl	0-0-0-0-0-0-0-0-0-0-0-0-0-0-0-0-0-0-0-0-0-0-0-0-0-0-0-0-0-0-0-0-0-0-0-0-0-0-0-0-0-1-0-0-0-0-1-0-1-1-0-0			21.7	0	0
305	TDP012	v^MFLREKQYDPVSL	0-0-0-0-0-0-0-0-0-0-1-1-0-0-0-0-0-0-0-0-0-0-0-0-0-0-0-0-0-0-0-0-0-0-0-0-0-0-0-1-0-1-0-0-1-1-1-0-0-0-0-0			24.3	0	0
306	TDP012	vm^FLREKQYDPVSL	0-0-0-0-0-0-0-0-0-0-0-0-0-0-0-0-0-0-0-0-0-0-0-0-0-0-0-0-0-0-0-0-0-0-0-0-0-0-0-1-1-0-0-0-0-0-1-0-1-1-0-0			25.3	0	0
307	TDP012	vmfl^REKQYDPVSL	1-1-1-1-1-0-0-0-0-0-0-0-0-0-0-0-0-0-0-0-0-0-0-0-0-0-0-0-0-0-0-0-0-0-0-0-0-0-0-0-1-1-1-0-1-1-1-1-1-1-1-1			30.9	0	0
308	TDP012	vmf^LREKQYDPV^sl	0-0-0-0-0-0-0-0-0-0-0-0-0-0-0-0-0-0-0-0-0-0-0-0-0-0-0-0-0-0-0-0-0-0-0-0-0-0-0-0-1-0-1-1-0-0-1-1-0-1-1-1			25	0	0
309	TDP012	vmf^LREKQYDPVSL	1-1-1-1-1-0-0-0-0-0-0-0-1-0-0-0-1-0-0-0-0-0-0-0-0-0-0-0-0-0-0-0-0-0-0-0-0-0-0-0-1-1-1-0-0-1-1-0-1-1-1-0			29.3	0	0
310	TDP012	vm^FLREKQYDPV^sl	0-0-0-0-0-0-0-0-0-0-0-0-0-0-0-0-0-0-0-0-0-0-0-0-0-0-0-0-0-0-0-0-0-0-0-0-0-0-0-0-0-1-1-0-0-0-1-1-0-1-1-0			27.3	0	0
311	TDP012	VMFLREKQ^ydpvsl	0-0-0-0-0-0-0-0-0-0-0-0-0-0-0-0-0-0-0-0-0-0-0-0-0-0-0-0-0-0-0-0-0-0-0-0-0-0-0-0-1-1-0-0-0-1-1-1-1-1-0-0			21.5	0	0
312	TDP012	VMFLREKQY^dpvsl	0-0-0-0-0-0-0-0-0-0-0-0-0-0-0-0-0-0-0-0-0-0-0-0-0-0-0-0-0-0-0-0-0-0-0-0-0-0-0-0-1-1-0-0-1-1-1-0-0-0-0-0			26.5	0	0
313	TDP012	VMFLREK^qydpvsl	0-0-0-0-0-0-0-0-0-0-0-0-0-0-0-0-0-0-0-0-0-0-0-0-0-0-0-0-0-0-0-0-0-0-0-0-0-0-0-0-1-1-0-0-0-1-1-0-0-0-0-0			19.9	0	0
314	TDP012	VMFLREKQYDP^vsl	0-0-0-0-0-0-0-0-0-0-0-0-0-0-0-0-0-0-0-0-0-0-0-0-0-0-0-0-0-0-0-0-0-0-0-0-0-0-0-0-0-0-0-0-0-0-1-0-0-1-0-0			22.8	0	0
315	TDP012	vmflre^KQYDPVSL	0-0-0-1-1-0-0-0-0-0-0-0-0-0-0-0-0-0-0-0-0-0-0-0-0-0-0-0-0-0-0-0-0-0-0-0-0-0-0-0-0-1-1-0-0-0-1-0-0-1-0-0			18.4	0	0
316	TDP012	vmfl^REKQYDPV^sl	0-0-0-0-0-0-0-0-0-0-0-0-0-0-0-0-0-0-0-0-0-0-0-0-0-0-0-0-0-0-0-0-0-0-0-0-0-0-0-0-0-1-1-1-0-0-1-1-0-0-1-1			23.1	0	0
317	TDP012	VMFLR^ekqydpvsl	0-0-0-0-0-0-0-0-0-0-0-0-0-0-0-0-0-0-0-0-0-1-0-0-0-0-0-0-0-0-0-0-0-0-1-0-0-0-0-1-1-1-1-0-1-1-1-1-1-1-1-0			16.2	0	0
318
319
320	TDP013	YYKRFMAH	0-0-0-0-0-0-0-0-0-0-0-0-0-0-0-0-0-0-0-0-0-0-0-0-0-0-0-0-0-0-0-0-0-0-0-0-0-0-0-0-1-1-0-0-1-1-2-0-0-1-0-0			26.3	0	0
321	TDP013	YKRFMAHW	1-1-1-1-1-0-0-0-0-0-1-1-1-1-1-1-1-1-0-0-0-0-0-0-0-0-0-0-0-0-0-0-0-0-0-0-0-0-0-0-1-1-0-0-1-1-1-0-1-1-1-0			22.7	0	0		YKRFMAHW	YKRFMAHW	YKRFMAHW	YKRFMAHW	YKRFMAHW						YKRFMAHW	YKRFMAHW	YKRFMAHW	YKRFMAHW	YKRFMAHW	YKRFMAHW	YKRFMAHW	YKRFMAHW
322	TDP013	KRFMAHWV	0-0-0-0-0-0-0-0-0-0-0-0-0-0-0-0-0-0-0-0-0-0-0-0-0-0-0-0-0-0-0-0-0-0-0-0-0-0-0-0-2-1-0-0-2-1-0-0-1-1-0-0			23.6	0	0
323	TDP013	RFMAHWVG	0-0-0-0-0-0-0-0-0-0-0-0-0-0-0-0-0-0-0-0-1-1-0-0-0-0-0-0-1-1-0-0-0-0-0-0-0-0-0-0-1-0-0-0-1-1-0-0-1-0-0-0			18	0	0																						RFMAHWVG	RFMAHWVG							RFMAHWVG	RFMAHWVG
324	TDP013	FMAHWVGI	0-0-0-0-0-0-0-0-0-0-0-1-1-1-0-0-0-0-0-0-0-1-0-0-0-0-0-0-0-0-0-0-0-0-1-0-0-0-0-1-0-0-0-0-1-0-0-0-1-0-0-0			30.7	0	0													FMAHWVGI	FMAHWVGI	FMAHWVGI								FMAHWVGI													FMAHWVGI					FMAHWVGI
325	TDP013	GMYYKRFM	0-0-0-0-0-0-0-0-0-0-0-0-0-0-0-0-0-0-0-1-0-0-0-0-0-0-0-0-0-1-0-0-0-0-0-0-0-0-0-0-0-0-0-0-0-0-0-0-0-0-0-0			17.1	0	0																					GMYYKRFM										GMYYKRFM
326	TDP013	XXXGMYYK	0-0-0-0-0-0-0-0-0-0-0-0-0-0-0-0-0-0-0-0-0-0-0-0-0-0-0-0-0-0-0-0-0-0-0-0-0-0-0-0-1-0-0-0-1-0-0-0-0-0-0-0			16.8	0	0
327	TDP013	MYYKRFMA	0-0-0-0-0-0-0-0-0-0-0-0-0-0-0-0-0-0-0-0-0-1-0-0-0-0-0-0-0-0-0-0-0-0-0-0-0-0-0-0-1-0-0-0-1-0-0-0-1-0-0-0			26	0	0																							MYYKRFMA
328	--------
329	TDP013	GMYYKRFMAH^wvgi	0-0-0-0-0-0-0-0-0-0-0-1-1-1-0-0-0-0-0-0-0-1-0-0-0-0-0-0-0-0-0-0-0-0-1-0-0-0-0-1-0-0-0-0-1-0-0-0-1-0-0-0			30.7	0	0
330	TDP013	gmyyk^RFMAHWVGI	0-0-0-0-0-0-0-0-0-0-0-0-0-0-0-0-0-0-0-0-0-1-0-0-0-0-0-0-0-0-0-0-0-0-0-0-0-0-0-0-1-0-0-0-1-0-0-0-1-0-0-0			26	0	0
331	TDP013	GMYYKRFMA^hwvgi	0-0-0-0-0-0-0-0-0-0-0-0-0-0-0-0-0-0-0-0-1-1-0-0-0-0-0-0-1-1-0-0-0-0-0-0-0-0-0-0-1-0-0-0-1-1-0-0-1-0-0-0			18	0	0
332	TDP013	GMYYKRF^mahwvgi	1-1-1-1-1-0-0-0-0-0-1-1-1-1-1-1-1-1-0-0-0-0-0-0-0-0-0-0-0-0-0-0-0-0-0-0-0-0-0-0-1-1-0-0-1-1-1-0-1-1-1-0			22.7	0	0
333	TDP013	GMYYKRFMAHWVGI	1-0-1-0-0-1-0-0-1-1-0-0-0-0-0-1-0-0-1-1-1-0-0-1-0-0-1-1-1-0-0-0-0-1-1-0-1-0-1-0-0-0-0-0-1-1-0-0-0-0-0-0	3 times in 3 NECs		17.7	19.2	0
334	TDP013	gmyy^KRFMAHWVGI	0-0-0-0-0-0-0-0-0-0-0-0-0-0-0-0-0-0-0-1-0-0-0-0-0-0-0-0-0-1-0-0-0-0-0-0-0-0-0-0-0-0-0-0-0-0-0-0-0-0-0-0			17.1	0	0
335	TDP013	GMYYKRFM^ahwvgi	0-0-0-0-0-0-0-0-0-0-0-0-0-0-0-0-0-0-0-0-0-0-0-0-0-0-0-0-0-0-0-0-0-0-0-0-0-0-0-0-1-1-0-0-1-1-0-0-1-1-0-0			23.6	0	0
336	TDP013	GMYYKR^fmahwvgi	0-0-0-0-0-0-0-0-0-0-0-0-0-0-0-0-0-0-0-0-0-0-0-0-0-0-0-0-0-0-0-0-0-0-0-0-0-0-0-0-1-1-0-0-0-0-1-0-0-1-0-0			26.3	0	0
337	TDP013	gmyykr^FMAHWVGI	0-0-0-0-0-0-0-0-0-0-0-0-0-0-0-0-0-0-0-0-0-0-0-0-0-0-0-0-0-0-0-0-0-0-0-0-0-0-0-0-0-0-0-0-1-1-1-0-0-0-0-0			17.1	0	0
338	TDP013	g^MYYKRFM^ahwvgi	0-0-0-0-0-0-0-0-0-0-0-0-0-0-0-0-0-0-0-0-0-0-0-0-0-0-0-0-0-0-0-0-0-0-0-0-0-0-0-0-1-0-0-0-1-0-0-0-0-0-0-0			16.8	0	0
339
340
341	TDP014	MVDQELSG	0-0-0-0-0-0-0-0-0-0-0-0-0-0-0-0-0-0-0-0-0-0-0-0-0-0-0-0-0-0-0-0-0-0-0-0-0-0-0-0-0-0-0-1-0-0-0-1-0-0-0-0			17.1	0	0
342	TDP014	NTIKVXXX	0-0-0-0-1-0-0-0-0-1-0-0-0-0-0-0-0-0-0-0-0-0-0-0-0-0-0-0-0-0-0-0-0-0-1-0-0-0-0-1-0-0-0-1-0-0-0-0-0-0-0-1			38.4	0	0						NTIKVXXX					NTIKVXXX																									NTIKVXXX					NTIKVXXX
343	TDP014	VDQELSGN	0-0-0-0-0-0-0-0-0-0-0-0-0-0-0-0-0-0-0-0-0-0-0-0-0-0-0-0-0-0-0-0-0-0-0-0-0-0-0-0-0-0-1-0-0-0-1-1-0-0-1-1			19.1	0	0
344	TDP014	XXXMMVDQ	0-0-0-0-1-0-0-0-0-0-0-0-0-0-0-0-0-0-0-0-0-0-0-0-0-0-0-0-0-0-0-0-0-0-0-0-0-0-0-0-0-0-1-1-0-0-1-1-0-0-1-1			33	0	0						XXXMMVDQ
345	TDP014	MMVDQELS	0-0-0-0-0-0-0-0-0-0-0-0-0-0-0-0-0-0-0-0-0-0-0-0-0-0-0-0-0-0-0-0-0-0-0-0-0-0-0-0-0-1-1-0-0-0-1-1-0-0-1-1			18.3	0	0
346	TDP014	XXMMVDQE	0-1-0-0-0-1-0-0-0-0-0-1-0-0-1-0-0-0-0-0-0-0-0-0-0-0-0-0-0-0-0-0-0-0-1-0-0-0-0-1-1-1-1-1-1-1-0-1-1-1-1-1			28.2	0	0			XXMMVDQE				XXMMVDQE						XXMMVDQE			XXMMVDQE																				XXMMVDQE					XXMMVDQE
347	--------
348	TDP014	MMVDQELSGNTIK^v	0-0-0-0-1-0-0-0-0-1-0-0-0-0-0-0-0-0-0-0-0-0-0-0-0-0-0-0-0-0-0-0-0-0-1-0-0-0-0-1-0-0-0-1-0-0-0-0-0-0-0-1			38.4	0	0
349	TDP014	MMVDQELSGNTIKV	1-1-1-1-1-1-1-1-1-1-1-1-1-1-1-1-1-1-1-1-1-1-1-1-1-1-1-1-1-1-1-1-1-1-1-1-1-1-1-1-1-1-1-1-1-1-1-1-1-1-1-1	3 times in 3 NECs		39.2	37.5	0
350	TDP014	m^MVDQELSGNTIKV	0-0-0-0-1-0-0-0-0-0-0-0-0-0-0-0-0-0-0-0-0-0-0-0-0-0-0-0-0-0-0-0-0-0-0-0-0-0-0-0-0-0-1-1-0-0-1-1-0-0-1-1			33	0	0
351	TDP014	mm^VDQELSGNTIKV	0-1-0-0-0-1-0-0-0-0-0-1-0-0-1-0-0-0-0-0-0-0-0-0-0-0-0-0-0-0-0-0-0-0-1-0-0-0-0-1-1-1-1-1-1-1-0-1-1-1-1-1			28.2	0	0
352	TDP014	mmvdq^ELSGNTIKV	0-0-0-0-0-0-0-0-0-0-0-0-0-0-0-0-0-0-0-0-0-0-0-0-0-0-0-0-0-0-0-0-0-0-0-0-0-0-0-0-0-0-0-1-0-0-0-1-0-0-0-0			17.1	0	0
353	TDP014	mmvdqe^LSGNTIKV	0-0-0-0-0-0-0-0-0-0-0-0-0-0-0-0-0-0-0-0-0-0-0-0-0-0-0-0-0-0-0-0-0-0-0-0-0-0-0-0-0-0-1-0-0-0-1-1-0-0-1-1			19.1	0	0
354	TDP014	mmvd^QELSGNTIKV	0-0-0-0-0-0-0-0-0-0-0-0-0-0-0-0-0-0-0-0-0-0-0-0-0-0-0-0-0-0-0-0-0-0-0-0-0-0-0-0-0-1-1-0-0-0-1-1-0-0-1-1			18.3	0	0
355
356
357	TDP015	DRGWYLAI	1-1-1-1-1-0-0-0-0-0-0-0-1-1-0-0-0-1-0-0-0-0-0-0-0-0-0-0-0-0-0-0-0-0-0-0-0-0-0-0-1-1-2-2-1-1-1-2-0-1-1-1			22.6	0	0		DRGWYLAI	DRGWYLAI	DRGWYLAI	DRGWYLAI	DRGWYLAI								DRGWYLAI	DRGWYLAI				DRGWYLAI
358	TDP015	RGWYLAIQ	0-1-1-1-1-0-0-0-0-1-1-1-1-1-0-0-1-1-0-0-0-0-0-0-0-0-0-0-0-0-0-0-0-0-0-0-0-0-0-0-1-1-1-0-1-1-2-1-1-0-1-1			24.9	0	0			RGWYLAIQ	RGWYLAIQ	RGWYLAIQ	RGWYLAIQ					RGWYLAIQ	RGWYLAIQ	RGWYLAIQ	RGWYLAIQ	RGWYLAIQ			RGWYLAIQ	RGWYLAIQ
359	TDP015	GWYLAIQA	0-1-1-1-1-0-0-0-0-0-0-0-1-1-0-0-0-1-0-0-0-0-0-0-0-0-0-0-0-0-0-0-0-0-0-0-0-0-0-0-1-1-1-0-1-1-1-1-1-1-1-0			24.2	0	0			GWYLAIQA	GWYLAIQA	GWYLAIQA	GWYLAIQA								GWYLAIQA	GWYLAIQA				GWYLAIQA
360	TDP015	WYLAIQAV	0-0-0-0-0-0-0-0-0-1-0-0-0-1-0-0-0-0-0-0-0-0-0-0-0-0-0-0-0-0-0-0-0-0-0-0-0-0-0-0-1-0-0-0-0-1-2-0-0-0-0-0			18.2	0	0											WYLAIQAV				WYLAIQAV
361	TDP015	YLAIQAVX	0-0-0-0-0-0-0-0-0-0-0-0-0-0-0-0-0-0-0-0-0-0-0-0-0-0-0-0-0-0-0-0-0-0-0-0-0-0-0-0-1-1-0-0-1-1-1-0-1-1-0-0			22.3	0	0
362	TDP015	LAIQAVXX	1-1-1-1-0-1-1-1-1-1-1-1-1-1-0-0-0-0-0-0-0-0-0-0-0-0-0-0-0-0-0-0-1-1-1-0-0-0-1-0-1-0-0-0-1-1-2-0-1-2-0-0			28.6	0	0		LAIQAVXX	LAIQAVXX	LAIQAVXX	LAIQAVXX		LAIQAVXX	LAIQAVXX	LAIQAVXX	LAIQAVXX	LAIQAVXX	LAIQAVXX	LAIQAVXX	LAIQAVXX	LAIQAVXX																			LAIQAVXX	LAIQAVXX	LAIQAVXX				LAIQAVXX
363	TDP015	AIQAVXXX	0-0-1-0-0-0-1-1-1-1-0-1-0-0-0-1-1-1-0-0-0-0-0-0-0-0-0-0-0-0-0-0-0-0-0-0-0-0-0-0-0-0-0-0-0-0-0-0-0-0-0-0			23.4	0	0				AIQAVXXX				AIQAVXXX	AIQAVXXX	AIQAVXXX	AIQAVXXX		AIQAVXXX				AIQAVXXX	AIQAVXXX	AIQAVXXX
364	TDP015	XXXAMTDR	0-0-0-0-0-0-0-0-0-0-0-0-0-0-0-0-0-0-0-0-0-0-0-0-0-0-0-0-0-0-0-0-0-0-0-0-0-0-0-0-0-0-1-1-0-1-3-1-0-0-0-0			20.6	0	0
365	TDP015	XXAMTDRG	0-0-0-0-0-0-0-0-0-0-0-0-0-0-0-0-0-0-0-0-0-0-0-0-0-0-0-0-0-0-0-0-0-0-0-0-0-0-0-0-0-1-0-0-0-1-1-0-1-2-1-0			22.9	0	0
366	--------
367	TDP015	AMTDRGWYLAIQAV	1-1-1-1-0-1-1-1-1-1-1-1-1-0-1-1-1-1-1-1-1-1-1-1-1-1-1-1-1-1-1-1-1-1-1-1-1-1-1-1-1-1-1-0-1-1-1-1-1-1-1-0	3 times in 3 NECs		31.9	31	0
368	TDP015	AMTDRGWY^laiqav	0-1-1-1-1-0-0-0-0-1-1-1-1-1-0-0-1-1-0-0-0-0-0-0-0-0-0-0-0-0-0-0-0-0-0-0-0-0-0-0-1-1-1-0-1-1-1-1-1-0-1-1			24.9	0	0
369	TDP015	AMTDRGWYLAIQ^av	1-1-1-1-0-1-1-1-1-1-1-1-1-1-0-0-0-0-0-0-0-0-0-0-0-0-0-0-0-0-0-0-1-1-1-0-0-0-1-0-1-0-0-0-1-1-1-0-1-1-0-0			28.6	0	0
370	TDP015	a^MTDRGWYLAIQAV	0-0-0-0-0-0-0-0-0-0-0-0-0-0-0-0-0-0-0-0-0-0-0-0-0-0-0-0-0-0-0-0-0-0-0-0-0-0-0-0-0-0-0-0-0-1-1-0-0-0-0-0			18	0	0
371	TDP015	AMTDRGW^ylaiqav	1-1-1-1-1-0-0-0-0-0-0-0-1-1-0-0-0-1-0-0-0-0-0-0-0-0-0-0-0-0-0-0-0-0-0-0-0-0-0-0-1-1-1-1-1-1-1-1-0-1-1-1			22.6	0	0
372	TDP015	AMTDRGWYLAIQA^v	0-0-1-0-0-0-1-1-1-1-0-1-0-0-0-1-1-1-0-0-0-0-0-0-0-0-0-0-0-0-0-0-0-0-0-0-0-0-0-0-0-0-0-0-0-0-0-0-0-0-0-0			23.4	0	0
373	TDP015	am^TDRGWYLAIQAV	0-0-0-0-0-0-0-0-0-0-0-0-0-0-0-0-0-0-0-0-0-0-0-0-0-0-0-0-0-0-0-0-0-0-0-0-0-0-0-0-0-1-0-0-0-1-0-0-1-1-1-0			22.9	0	0
374	TDP015	AMTDRGWYL^aiqav	0-1-1-1-1-0-0-0-0-0-0-0-1-1-0-0-0-1-0-0-0-0-0-0-0-0-0-0-0-0-0-0-0-0-0-0-0-0-0-0-1-1-1-0-1-1-1-1-1-1-1-0			24.2	0	0
375	TDP015	a^MTDRGWY^laiqav	0-0-0-0-0-0-0-0-0-0-0-0-0-0-0-0-0-0-0-0-0-0-0-0-0-0-0-0-0-0-0-0-0-0-0-0-0-0-0-0-0-0-0-0-0-0-1-0-0-0-0-0			20.6	0	0
376	TDP015	am^TDRGWYLAIQ^av	0-0-0-0-0-0-0-0-0-0-0-0-0-0-0-0-0-0-0-0-0-0-0-0-0-0-0-0-0-0-0-0-0-0-0-0-0-0-0-0-0-0-0-0-0-0-1-0-0-1-0-0			18.7	0	0
377	TDP015	AMTDRGWYLAI^qav	0-0-0-0-0-0-0-0-0-0-0-0-0-0-0-0-0-0-0-0-0-0-0-0-0-0-0-0-0-0-0-0-0-0-0-0-0-0-0-0-1-1-0-0-1-1-1-0-1-1-0-0			22.3	0	0
378	TDP015	AMTDRGWYLA^iqav	0-0-0-0-0-0-0-0-0-1-0-0-0-1-0-0-0-0-0-0-0-0-0-0-0-0-0-0-0-0-0-0-0-0-0-0-0-0-0-0-1-0-0-0-0-1-1-0-0-0-0-0			17.1	0	0
379	TDP015	a^MTDRGWYLA^iqav	0-0-0-0-0-0-0-0-0-0-0-0-0-0-0-0-0-0-0-0-0-0-0-0-0-0-0-0-0-0-0-0-0-0-0-0-0-0-0-0-0-0-0-0-0-0-1-0-0-0-0-0			18.2	0	0
380	TDP015	a^MTDRGW^ylaiqav	0-0-0-0-0-0-0-0-0-0-0-0-0-0-0-0-0-0-0-0-0-0-0-0-0-0-0-0-0-0-0-0-0-0-0-0-0-0-0-0-0-0-1-1-0-0-0-1-0-0-0-0			17.5	0	0
381
382
383	TDP016	XSMQFNVK	0-0-0-0-0-0-0-0-0-0-0-0-0-0-0-0-0-0-0-0-0-0-0-0-0-0-0-0-0-0-0-0-0-0-0-0-0-0-0-0-0-0-0-0-0-0-0-0-0-0-1-0			26.3	0	0
384	TDP016	QFNVKSHP	0-0-0-0-0-0-0-0-0-0-0-0-0-0-0-0-0-0-0-0-0-0-0-0-0-0-0-0-0-0-0-0-0-0-0-0-0-0-0-0-0-0-0-1-0-0-1-1-0-0-1-1			18.7	0	0
385	TDP016	XXXSMQFN	0-1-0-0-0-0-0-0-0-0-0-0-0-0-0-0-0-0-0-0-0-0-0-0-0-0-0-0-1-0-0-0-0-0-0-0-0-0-0-0-0-0-0-0-0-0-0-0-0-0-0-0			15.7	0	0			XXXSMQFN																											XXXSMQFN
386	TDP016	SMQFNVKS	0-0-1-1-1-0-0-0-0-0-0-0-0-0-0-0-0-0-0-0-0-0-0-0-0-0-0-0-0-0-0-0-0-0-0-0-0-0-0-0-0-0-1-1-0-1-1-1-0-1-1-1			25.2	0	0				SMQFNVKS	SMQFNVKS	SMQFNVKS
387	TDP016	XXSMQFNV	0-0-0-0-0-0-0-0-0-0-0-0-0-0-0-0-0-0-0-0-0-0-0-0-0-0-0-0-0-0-0-0-0-0-0-0-0-0-0-0-0-0-0-0-0-0-1-1-0-0-1-0			24.9	0	0
388	TDP016	FNVKSHPE	0-0-0-0-0-0-0-0-0-0-0-0-0-0-0-0-0-0-0-0-0-0-0-0-0-0-0-0-0-0-0-0-0-0-0-0-0-0-0-0-2-2-1-1-0-2-2-2-1-2-2-2			20.9	0	0
389	TDP016	NVKSHPEE	0-0-0-0-0-0-0-0-0-0-0-0-0-0-0-0-0-0-0-0-0-0-0-0-0-0-0-0-0-0-0-0-0-0-0-0-0-0-0-0-0-1-1-0-0-1-1-1-0-0-0-0			20.3	0	0
390	TDP016	SHPEELVX	0-0-0-0-0-0-0-0-0-0-0-0-0-0-0-0-0-0-0-0-0-0-0-0-0-0-0-0-0-0-0-0-0-0-0-0-0-0-0-0-0-0-1-0-0-0-1-1-0-0-0-0			20.2	0	0
391	TDP016	HPEELVXX	0-0-0-1-1-0-1-0-0-1-0-0-1-0-0-0-0-0-0-0-0-0-0-0-0-0-0-0-0-0-0-0-0-1-0-0-0-0-0-1-0-0-0-0-0-0-0-1-0-0-1-0			27.8	0	0					HPEELVXX	HPEELVXX		HPEELVXX			HPEELVXX			HPEELVXX																					HPEELVXX						HPEELVXX
392	TDP016	MQFNVKSH	0-0-0-0-0-0-0-0-0-0-0-0-0-0-0-0-0-0-0-0-0-0-0-0-0-0-0-0-0-0-0-0-0-0-0-0-0-0-0-0-0-0-0-1-0-0-1-1-0-0-1-1			22.5	0	0
393	--------
394	TDP016	SMQFNVKSHPEELV	1-1-1-1-1-1-1-1-1-1-1-1-1-1-1-1-1-1-1-1-1-1-1-1-1-1-1-1-1-1-1-0-1-1-1-1-1-1-1-1-1-1-1-1-1-1-1-1-1-1-1-1	3 times in 3 NECs		37.1	28.6	0
395	TDP016	SMQFNVKSHPEE^lv	0-0-0-1-1-0-1-0-0-1-0-0-1-0-0-0-0-0-0-0-0-0-0-0-0-0-0-0-0-0-0-0-0-1-0-0-0-0-0-1-0-0-0-0-0-0-0-1-0-0-1-0			27.8	0	0
396	TDP016	SMQFNVKSHPE^elv	0-0-0-0-0-0-0-0-0-0-0-0-0-0-0-0-0-0-0-0-0-0-0-0-0-0-0-0-0-0-0-0-0-0-0-0-0-0-0-0-0-0-1-0-0-0-1-1-0-0-0-0			20.2	0	0
397	TDP016	sm^QFNVKSHPEELV	0-0-0-0-0-0-0-0-0-0-0-0-0-0-0-0-0-0-0-0-0-0-0-0-0-0-0-0-0-0-0-0-0-0-0-0-0-0-0-0-0-0-0-0-0-0-1-1-0-0-1-0			24.9	0	0
398	TDP016	smq^FNVKSHPEELV	0-0-0-0-0-0-0-0-0-0-0-0-0-0-0-0-0-0-0-0-0-0-0-0-0-0-0-0-0-0-0-0-0-0-0-0-0-0-0-0-0-0-0-0-0-0-0-0-0-0-1-0			26.3	0	0
399	TDP016	smqfnvk^SHPEELV	0-0-0-0-0-0-0-0-0-0-0-0-0-0-0-0-0-0-0-0-0-0-0-0-0-0-0-0-0-0-0-0-0-0-0-0-0-0-0-0-1-1-0-1-0-1-1-1-0-1-1-1			17.1	0	0
400	TDP016	smqf^NVKSHPEELV	0-0-1-1-1-0-0-0-0-0-0-0-0-0-0-0-0-0-0-0-0-0-0-0-0-0-0-0-0-0-0-0-0-0-0-0-0-0-0-0-0-0-1-1-0-1-1-1-0-1-1-1			25.2	0	0
401	TDP016	smqfnv^KSHPEELV	0-0-0-0-0-0-0-0-0-0-0-0-0-0-0-0-0-0-0-0-0-0-0-0-0-0-0-0-0-0-0-0-0-0-0-0-0-0-0-0-0-0-0-1-0-0-1-1-0-0-1-1			18.7	0	0
402	TDP016	SMQFNVKS^hpeelv	0-0-0-0-0-0-0-0-0-0-0-0-0-0-0-0-0-0-0-0-0-0-0-0-0-0-0-0-0-0-0-0-0-0-0-0-0-0-0-0-0-1-1-0-0-1-1-1-0-0-0-0			20.3	0	0
403	TDP016	SMQFNVK^shpeelv	0-0-0-0-0-0-0-0-0-0-0-0-0-0-0-0-0-0-0-0-0-0-0-0-0-0-0-0-0-0-0-0-0-0-0-0-0-0-0-0-1-1-1-0-0-1-1-1-1-1-1-1			20.9	0	0
404	TDP016	smqfn^VKSHPEELV	0-0-0-0-0-0-0-0-0-0-0-0-0-0-0-0-0-0-0-0-0-0-0-0-0-0-0-0-0-0-0-0-0-0-0-0-0-0-0-0-0-0-0-1-0-0-1-1-0-0-1-1			22.5	0	0
405	TDP016	s^MQFNVKSHPEELV	0-1-0-0-0-0-0-0-0-0-0-0-0-0-0-0-0-0-0-0-0-0-0-0-0-0-0-0-1-0-0-0-0-0-0-0-0-0-0-0-0-0-0-0-0-0-0-0-0-0-0-0			15.7	0	0
406
407
408	TDP017	XXRMENYM	0-0-0-0-0-0-0-0-0-0-1-1-0-0-0-0-0-0-0-0-0-0-0-0-0-0-0-0-0-0-0-0-0-0-0-0-0-0-0-0-1-0-1-0-0-1-1-0-1-1-1-1			26.3	0	0												XXRMENYM	XXRMENYM
409	TDP017	VLTKAAPV	0-0-0-0-0-0-0-0-1-1-0-1-1-0-0-0-0-0-0-0-0-0-0-0-0-0-0-0-0-0-0-0-0-0-0-0-0-0-0-1-1-2-4-0-1-1-2-1-1-1-2-1			29	0	0										VLTKAAPV	VLTKAAPV		VLTKAAPV	VLTKAAPV																											VLTKAAPV
410	TDP017	XXXRMENY	0-0-0-0-0-0-0-0-0-0-0-0-0-0-0-0-0-0-0-0-0-0-0-0-0-0-0-0-0-0-0-0-0-0-0-0-0-0-0-0-0-1-1-0-1-0-1-2-1-1-0-0			29	0	0
411	TDP017	NYMVLTKA	0-0-0-0-0-0-0-0-0-0-0-0-0-0-0-0-0-0-0-0-0-0-0-0-0-0-0-0-0-0-0-0-0-0-0-0-0-0-0-0-0-0-0-0-0-0-1-1-0-0-1-0			15.6	0	0
412	TDP017	MENYMVLT	1-1-1-1-2-0-0-1-0-0-1-1-1-1-1-1-1-2-0-0-0-0-0-0-0-0-0-0-0-0-0-1-0-1-1-0-0-0-0-0-1-1-1-0-1-1-1-1-1-1-1-0			23.5	0	0		MENYMVLT	MENYMVLT	MENYMVLT	MENYMVLT	MENYMVLT			MENYMVLT			MENYMVLT	MENYMVLT	MENYMVLT	MENYMVLT	MENYMVLT	MENYMVLT	MENYMVLT	MENYMVLT														MENYMVLT		MENYMVLT	MENYMVLT
413	TDP017	TKAAPVXX	0-0-0-0-1-0-0-0-0-0-0-0-1-0-0-0-1-1-0-0-0-0-0-0-0-0-0-0-0-0-0-0-0-0-0-0-0-0-0-0-0-0-0-0-0-0-0-0-0-0-0-0			22.9	0	0						TKAAPVXX								TKAAPVXX				TKAAPVXX	TKAAPVXX
414	TDP017	XRMENYMV	0-0-0-0-0-0-0-0-0-0-0-0-0-0-0-0-0-0-0-0-0-0-0-0-0-0-0-0-0-0-0-0-0-0-0-0-0-0-0-0-1-1-1-0-0-0-1-0-1-1-2-0			22.8	0	0
415	TDP017	KAAPVXXX	0-0-1-1-1-0-1-0-1-1-0-1-1-1-0-1-1-2-0-1-1-1-0-0-0-0-0-0-0-1-0-0-0-0-0-0-0-0-0-0-0-1-0-0-0-1-1-0-1-1-2-0			31.3	0	0				KAAPVXXX	KAAPVXXX	KAAPVXXX		KAAPVXXX		KAAPVXXX	KAAPVXXX		KAAPVXXX	KAAPVXXX	KAAPVXXX		KAAPVXXX	KAAPVXXX	KAAPVXXX		KAAPVXXX	KAAPVXXX	KAAPVXXX								KAAPVXXX
416	TDP017	YMVLTKAA	0-1-1-1-0-0-0-0-0-0-0-1-1-1-0-1-1-1-0-0-0-0-0-0-0-0-0-0-0-0-0-0-0-0-0-0-0-0-0-0-1-1-0-0-1-1-1-1-0-0-1-0			21	0	0			YMVLTKAA	YMVLTKAA	YMVLTKAA								YMVLTKAA	YMVLTKAA	YMVLTKAA		YMVLTKAA	YMVLTKAA	YMVLTKAA
417	TDP017	MVLTKAAP	0-0-0-0-0-0-0-0-0-0-0-0-0-0-0-0-0-0-0-0-0-0-0-0-0-0-0-0-0-0-0-0-0-0-0-0-0-0-0-0-0-1-1-0-0-1-1-1-1-1-1-0			22.4	0	0
418	TDP017	LTKAAPVX	0-0-0-0-0-0-0-0-0-0-0-0-1-0-0-0-0-0-0-0-0-0-0-0-0-0-0-0-0-0-0-0-0-0-0-0-0-0-0-0-0-1-0-0-1-1-1-0-0-1-1-0			30.4	0	0														LTKAAPVX
419	TDP017	ENYMVLTK	0-0-0-0-0-0-0-0-0-0-0-0-0-0-0-0-0-0-0-0-0-0-0-0-0-0-0-0-0-0-0-0-0-0-0-0-0-0-0-0-0-0-1-0-0-0-1-0-0-1-1-0			21.3	0	0
420	TDP017	RMENYMVL	1-1-0-1-2-0-1-0-0-1-0-1-0-1-0-0-1-2-0-0-0-0-0-0-0-0-0-0-0-0-0-0-0-0-0-0-0-0-0-0-0-1-2-0-0-1-2-0-0-0-2-0			23.9	0	0		RMENYMVL	RMENYMVL		RMENYMVL	RMENYMVL		RMENYMVL			RMENYMVL		RMENYMVL		RMENYMVL			RMENYMVL	RMENYMVL
421	--------
422	TDP017	RMENYMVLTKAAPV	1-1-1-1-1-1-1-1-1-1-1-1-1-1-1-1-1-1-1-1-1-1-1-1-1-1-1-1-1-1-1-1-1-1-1-1-1-1-1-1-1-1-0-1-1-1-1-1-1-1-1-1	3 times in 3 NECs		41.8	35.4	0
423	TDP017	RMENYMVLTKAAP^v	0-0-1-1-0-0-1-0-1-1-0-1-1-0-0-1-1-1-0-1-1-1-0-0-0-0-0-0-0-1-0-0-0-0-0-0-0-0-0-0-0-1-0-0-0-1-1-0-1-1-1-0			31.3	0	0
424	TDP017	r^MENYMVLTKAAPV	0-0-0-0-0-0-0-0-0-0-0-0-0-0-0-0-0-0-0-0-0-0-0-0-0-0-0-0-0-0-0-0-0-0-0-0-0-0-0-0-0-0-0-0-1-0-1-1-1-1-0-0			28.8	0	0
425	TDP017	RMENYMVLTKA^apv	0-0-0-0-0-0-0-0-0-0-0-0-1-0-0-0-0-0-0-0-0-0-0-0-0-0-0-0-0-0-0-0-0-0-0-0-0-0-0-0-0-1-0-0-1-1-1-0-0-1-1-0			30.4	0	0
426	TDP017	rm^ENYMVLTKAAPV	0-0-0-0-0-0-0-0-0-0-1-1-0-0-0-0-0-0-0-0-0-0-0-0-0-0-0-0-0-0-0-0-0-0-0-0-0-0-0-0-1-0-0-0-0-1-1-0-1-1-1-0			26.3	0	0
427	TDP017	r^MENYMVLTK^aapv	0-0-0-0-0-0-0-0-0-0-0-0-0-0-0-0-0-0-0-0-0-0-0-0-0-0-0-0-0-0-0-0-0-0-0-0-0-0-0-0-0-1-1-0-0-0-0-1-0-0-0-0			29	0	0
428	TDP017	rmen^YMVLTKAAPV	1-1-0-1-1-0-1-0-0-1-0-1-0-0-0-0-1-1-0-0-0-0-0-0-0-0-0-0-0-0-0-0-0-0-0-0-0-0-0-0-0-1-1-0-0-1-1-0-0-0-1-0			23.9	0	0
429	TDP017	rme^NYMVLTKAAPV	0-0-0-0-0-0-0-0-0-0-0-0-0-0-0-0-0-0-0-0-0-0-0-0-0-0-0-0-0-0-0-0-0-0-0-0-0-0-0-0-1-1-1-0-0-0-1-0-1-1-1-0			22.8	0	0
430	TDP017	rm^ENYMVLTK^aapv	0-0-0-0-0-0-0-0-0-0-0-0-0-0-0-0-0-0-0-0-0-0-0-0-0-0-0-0-0-0-0-0-0-0-0-0-0-0-0-0-0-0-1-0-0-0-0-0-0-0-0-1			20.7	0	0
431	TDP017	RMENYMVLTKAA^pv	0-0-0-0-0-0-0-0-0-0-0-0-1-0-0-0-1-0-0-0-0-0-0-0-0-0-0-0-0-0-0-0-0-0-0-0-0-0-0-0-0-0-0-0-0-0-0-0-0-0-0-0			22.9	0	0
432	TDP017	RMENYMVLT^kaapv	0-0-0-0-0-0-0-0-0-0-0-0-0-0-0-0-0-0-0-0-0-0-0-0-0-0-0-0-0-0-0-0-0-0-0-0-0-0-0-0-0-1-1-0-0-1-1-1-1-1-1-0			22.4	0	0
433	TDP017	RMENYMVLTK^aapv	0-0-0-0-0-0-0-0-1-1-0-1-1-0-0-0-0-0-0-0-0-0-0-0-0-0-0-0-0-0-0-0-0-0-0-0-0-0-0-1-1-1-1-0-1-1-1-0-1-1-1-0			24.8	0	0
434	TDP017	rmeny^MVLTKAAPV	1-1-1-1-1-0-0-1-0-0-1-1-1-1-1-1-1-1-0-0-0-0-0-0-0-0-0-0-0-0-0-1-0-1-1-0-0-0-0-0-1-1-1-0-1-1-1-1-1-1-1-0			23.5	0	0
435	TDP017	rmenym^VLTKAAPV	0-0-0-0-0-0-0-0-0-0-0-0-0-0-0-0-0-0-0-0-0-0-0-0-0-0-0-0-0-0-0-0-0-0-0-0-0-0-0-0-0-0-1-0-0-0-1-0-0-1-1-0			21.3	0	0
436	TDP017	RMENYMVL^tkaapv	0-1-1-1-0-0-0-0-0-0-0-1-1-1-0-1-1-1-0-0-0-0-0-0-0-0-0-0-0-0-0-0-0-0-0-0-0-0-0-0-1-1-0-0-1-1-1-1-0-0-1-0			21	0	0
437	TDP017	rmen^YMVLTKAAP^v	0-0-0-0-1-0-0-0-0-0-0-0-0-1-0-0-0-1-0-0-0-0-0-0-0-0-0-0-0-0-0-0-0-0-0-0-0-0-0-0-0-0-0-0-0-0-0-0-0-0-0-0			16.7	0	0
438	TDP017	rmeny^MVLTKAA^pv	0-0-0-0-1-0-0-0-0-0-0-0-0-0-0-0-0-1-0-0-0-0-0-0-0-0-0-0-0-0-0-0-0-0-0-0-0-0-0-0-0-0-0-0-0-0-0-0-0-0-0-0			15.5	0	0
439	TDP017	rmen^YMVLTK^aapv	0-0-0-0-0-0-0-0-0-0-0-0-0-0-0-0-0-0-0-0-0-0-0-0-0-0-0-0-0-0-0-0-0-0-0-0-0-0-0-0-0-0-1-0-0-0-1-0-0-0-1-0			16.2	0	0
440	TDP017	rme^NYMVLTKAAP^v	0-0-0-0-0-0-0-0-0-0-0-0-0-0-0-0-0-0-0-0-0-0-0-0-0-0-0-0-0-0-0-0-0-0-0-0-0-0-0-0-0-0-0-0-0-0-0-0-0-0-1-0			17.1	0	0
441	TDP017	rmenymv^LTKAAPV	0-0-0-0-0-0-0-0-0-0-0-0-0-0-0-0-0-0-0-0-0-0-0-0-0-0-0-0-0-0-0-0-0-0-0-0-0-0-0-0-0-0-0-0-0-0-1-1-0-0-1-0			15.6	0	0
442
443
444	TDP018	XXYMDSIR	1-0-0-0-0-1-0-1-0-0-1-1-0-0-1-1-0-0-0-0-0-1-0-0-0-0-0-0-0-0-0-0-0-0-0-0-0-0-0-1-1-1-1-2-0-0-2-2-1-2-2-2			30	0	0		XXYMDSIR					XXYMDSIR		XXYMDSIR			XXYMDSIR	XXYMDSIR			XXYMDSIR	XXYMDSIR						XXYMDSIR																		XXYMDSIR
445	TDP018	HQGPFWML	0-0-0-0-0-0-0-0-0-0-0-0-0-0-0-0-0-0-0-0-1-1-0-0-0-0-0-0-0-1-0-0-0-0-0-0-0-0-0-0-1-0-1-3-1-1-2-3-1-1-1-2			30.7	0	0																						HQGPFWML	HQGPFWML								HQGPFWML
446	TDP018	QGPFWMLX	0-0-0-0-0-0-0-0-0-0-0-0-0-0-0-0-0-0-0-0-0-0-0-0-0-0-0-0-0-0-0-0-0-0-0-0-0-0-0-0-0-0-2-1-0-0-1-1-0-1-2-2			34.9	0	0
447	TDP018	GPFWMLXX	0-1-0-1-2-0-1-1-1-1-0-2-2-1-0-0-0-0-0-0-0-0-0-0-0-0-0-0-0-0-0-0-0-1-1-0-0-0-0-1-1-2-3-0-1-2-4-0-1-3-4-2			41.8	0	0			GPFWMLXX		GPFWMLXX	GPFWMLXX		GPFWMLXX	GPFWMLXX	GPFWMLXX	GPFWMLXX		GPFWMLXX	GPFWMLXX	GPFWMLXX																				GPFWMLXX	GPFWMLXX					GPFWMLXX
448	TDP018	XXXYMDSI	0-1-0-0-0-1-0-0-0-0-1-0-0-0-1-1-0-0-0-1-1-1-0-0-0-0-0-0-1-0-0-0-1-1-0-1-0-0-1-1-1-0-1-1-1-0-3-2-1-1-1-1			28.8	0	0			XXXYMDSI				XXXYMDSI					XXXYMDSI				XXXYMDSI	XXXYMDSI				XXXYMDSI	XXXYMDSI	XXXYMDSI							XXXYMDSI				XXXYMDSI	XXXYMDSI		XXXYMDSI			XXXYMDSI	XXXYMDSI
449	TDP018	IRHQGPFW	0-0-0-0-0-0-0-0-0-0-0-0-0-0-0-0-0-0-0-0-0-0-0-0-0-0-0-0-0-0-0-0-0-0-0-0-0-0-0-0-1-1-1-1-0-1-1-2-1-1-1-1			29.8	0	0
450	TDP018	MDSIRHQG	0-0-0-0-0-0-0-0-0-0-0-0-0-0-0-0-0-0-0-0-0-0-0-0-0-0-0-0-0-0-0-0-0-0-0-0-0-0-0-0-1-0-0-0-0-1-0-0-1-0-0-0			16	0	0
451	TDP018	XYMDSIRH	1-1-1-0-1-1-0-1-1-1-1-2-3-0-1-1-1-1-1-1-0-1-0-1-0-0-1-1-1-1-1-1-1-1-1-1-1-1-1-1-1-1-2-0-1-1-3-0-1-1-2-2	2 times in 3 NECs		28.2	20.5	0		XYMDSIRH	XYMDSIRH	XYMDSIRH		XYMDSIRH	XYMDSIRH		XYMDSIRH	XYMDSIRH	XYMDSIRH	XYMDSIRH	XYMDSIRH	XYMDSIRH		XYMDSIRH	XYMDSIRH	XYMDSIRH	XYMDSIRH	XYMDSIRH	XYMDSIRH		XYMDSIRH		XYMDSIRH			XYMDSIRH	XYMDSIRH	XYMDSIRH	XYMDSIRH	XYMDSIRH	XYMDSIRH	XYMDSIRH	XYMDSIRH	XYMDSIRH	XYMDSIRH	XYMDSIRH	XYMDSIRH	XYMDSIRH	XYMDSIRH
452	TDP018	PFWMLXXX	0-1-0-0-1-0-0-0-0-1-0-1-2-0-0-0-1-1-0-0-0-0-0-0-0-0-0-0-0-0-0-0-0-0-0-0-0-0-0-0-1-0-0-0-0-0-1-0-0-0-0-0			22.5	0	0			PFWMLXXX			PFWMLXXX					PFWMLXXX		PFWMLXXX	PFWMLXXX				PFWMLXXX	PFWMLXXX
453	TDP018	DSIRHQGP	0-0-0-0-0-0-0-0-0-0-0-0-0-0-0-0-0-0-0-0-0-0-0-0-0-0-0-0-0-0-0-0-0-0-0-0-0-0-0-0-1-1-1-1-0-1-1-1-0-1-1-1			21.8	0	0
454	TDP018	SIRHQGPF	0-0-0-0-0-0-0-0-0-0-0-0-0-0-0-0-0-0-0-0-0-0-0-0-0-0-0-0-0-0-0-0-0-0-0-0-0-0-0-0-0-0-1-1-0-0-1-1-0-0-1-1			25.3	0	0
455	TDP018	RHQGPFWM	0-0-0-0-0-0-0-0-0-0-0-0-0-0-0-0-0-0-0-0-0-0-0-0-0-0-0-0-0-0-0-0-0-0-0-0-0-0-0-0-0-0-0-0-0-0-1-0-0-0-0-0			20.6	0	0
456	--------
457	TDP018	YMDSIRHQGPFW^ml	0-1-0-1-1-0-1-1-1-0-0-1-1-1-0-0-0-0-0-0-0-0-0-0-0-0-0-0-0-0-0-0-0-1-1-0-0-0-0-1-1-1-1-0-1-1-1-0-1-1-1-0			41.8	0	0
458	TDP018	YMDSIRHQGPFWML	1-1-1-1-1-1-1-1-1-1-1-1-1-1-1-1-1-1-1-1-1-1-1-1-1-1-1-1-1-1-1-1-1-1-1-1-1-1-1-1-1-1-1-0-1-1-1-1-1-1-1-1	3 times in 3 NECs		37.2	23.2	0
459	TDP018	YMDSIRHQG^pfwml	0-0-0-0-0-0-0-0-0-0-0-0-0-0-0-0-0-0-0-0-0-0-0-0-0-0-0-0-0-0-0-0-0-0-0-0-0-0-0-0-0-0-0-0-0-0-1-0-0-0-0-0			20.6	0	0
460	TDP018	YMDSIRHQGP^fwml	0-0-0-0-0-0-0-0-0-0-0-0-0-0-0-0-0-0-0-0-1-1-0-0-0-0-0-0-0-1-0-0-0-0-0-0-0-0-0-0-1-0-1-1-1-1-1-1-1-1-1-1			30.7	0	0
461	TDP018	ym^DSIRHQGPFW^ml	0-0-0-0-0-0-0-0-0-0-0-0-0-0-0-0-0-0-0-0-0-0-0-0-0-0-0-0-0-0-0-0-0-0-0-0-0-0-0-0-0-0-1-0-0-0-1-0-0-1-1-1			27.4	0	0
462	TDP018	y^MDSIRHQGPFW^ml	0-0-0-0-0-0-0-0-0-0-0-0-0-0-0-0-0-0-0-0-0-0-0-0-0-0-0-0-0-0-0-0-0-0-0-0-0-0-0-0-0-0-0-0-0-0-1-0-0-0-1-0			28.8	0	0
463	TDP018	YMDSIRHQ^gpfwml	0-0-0-0-0-0-0-0-0-0-0-0-0-0-0-0-0-0-0-0-0-0-0-0-0-0-0-0-0-0-0-0-0-0-0-0-0-0-0-0-1-1-1-1-0-1-1-1-1-1-1-1			29.8	0	0
464	TDP018	YMDSIRH^qgpfwml	0-0-0-0-0-0-0-0-0-0-0-0-0-0-0-0-0-0-0-0-0-0-0-0-0-0-0-0-0-0-0-0-0-0-0-0-0-0-0-0-0-0-1-1-0-0-1-1-0-0-1-1			25.3	0	0
465	TDP018	YMDSIRHQGPF^wml	0-0-0-0-0-0-0-0-0-0-0-0-0-0-0-0-0-0-0-0-0-0-0-0-0-0-0-0-0-0-0-0-0-0-0-0-0-0-0-0-0-0-0-0-0-0-0-0-0-1-0-0			34.9	0	0
466	TDP018	ymd^SIRHQGPFW^ml	0-0-0-0-1-0-0-0-0-1-0-1-1-0-0-0-0-0-0-0-0-0-0-0-0-0-0-0-0-0-0-0-0-0-0-0-0-0-0-0-0-1-1-0-0-1-1-0-0-1-1-1			26.7	0	0
467	TDP018	YMDSIRHQGPFWM^l	0-1-0-0-1-0-0-0-0-1-0-1-1-0-0-0-1-1-0-0-0-0-0-0-0-0-0-0-0-0-0-0-0-0-0-0-0-0-0-0-1-0-0-0-0-0-1-0-0-0-0-0			22.5	0	0
468	TDP018	ymd^SIRHQGPF^wml	0-0-0-0-0-0-0-0-0-0-0-0-0-0-0-0-0-0-0-0-0-0-0-0-0-0-0-0-0-0-0-0-0-0-0-0-0-0-0-0-0-0-1-0-0-0-1-0-0-0-1-1			19.2	0	0
469	TDP018	ym^DSIRHQGP^fwml	0-0-0-0-0-0-0-0-0-0-0-0-0-0-0-0-0-0-0-0-0-0-0-0-0-0-0-0-0-0-0-0-0-0-0-0-0-0-0-0-0-0-0-1-0-0-0-1-0-0-0-0			30	0	0
470	TDP018	y^MDSIRHQGP^fwml	0-0-0-0-0-0-0-0-0-0-0-0-0-0-0-0-0-0-0-0-0-0-0-0-0-0-0-0-0-0-0-0-0-0-0-0-0-0-0-0-0-0-0-1-0-0-1-1-0-0-0-1			24.1	0	0
471	TDP018	y^MDSIRHQGPFWML	0-1-0-0-0-1-0-0-0-0-1-0-0-0-1-1-0-0-0-1-1-1-0-0-0-0-0-0-1-0-0-0-1-1-0-1-0-0-1-1-1-0-0-0-1-0-1-0-1-1-0-0			22.6	0	0
472	TDP018	YMDSIR^hqgpfwml	0-0-0-0-0-0-0-0-0-0-0-0-0-0-0-0-0-0-0-0-0-0-0-0-0-0-0-0-0-0-0-0-0-0-0-0-0-0-0-0-1-1-1-1-0-1-1-1-0-1-1-1			21.8	0	0
473	TDP018	ymd^SIRHQGPFWML	1-1-1-0-0-1-0-1-1-0-1-1-1-0-1-1-1-1-1-1-0-1-0-1-0-0-1-1-1-1-1-1-1-1-1-1-1-1-1-1-1-0-0-0-1-0-1-0-1-0-0-0	2 times in 3 NECs		28.2	20.5	0
474	TDP018	ym^DSIRHQGPF^wml	0-0-0-0-0-0-0-0-0-0-0-0-0-0-0-0-0-0-0-0-0-0-0-0-0-0-0-0-0-0-0-0-0-0-0-0-0-0-0-0-0-0-0-1-0-0-0-1-0-0-1-1			18.6	0	0
475	TDP018	ym^DSIRHQGPFWML	1-0-0-0-0-1-0-1-0-0-1-1-0-0-1-1-0-0-0-0-0-1-0-0-0-0-0-0-0-0-0-0-0-0-0-0-0-0-0-1-1-1-0-0-0-0-1-0-1-1-0-0			27.7	0	0
476	TDP018	y^MDSIRHQGPF^wml	0-0-0-0-0-0-0-0-0-0-0-0-0-0-0-0-0-0-0-0-0-0-0-0-0-0-0-0-0-0-0-0-0-0-0-0-0-0-0-0-0-0-1-0-0-0-0-0-0-0-0-0			19	0	0
477	TDP018	ymdsi^RHQGPFWML	0-0-0-0-0-0-0-0-0-0-0-0-0-0-0-0-0-0-0-0-0-0-0-0-0-0-0-0-0-0-0-0-0-0-0-0-0-0-0-0-1-0-0-0-0-1-0-0-1-0-0-0			16	0	0
478	TDP018	ymd^SIRHQGPFWM^l	0-0-0-0-0-0-0-0-0-0-0-0-1-0-0-0-0-0-0-0-0-0-0-0-0-0-0-0-0-0-0-0-0-0-0-0-0-0-0-0-0-0-0-0-0-0-0-0-0-0-0-0			16.1	0	0
479	TDP018	y^MDSIRHQ^gpfwml	0-0-0-0-0-0-0-0-0-0-0-0-0-0-0-0-0-0-0-0-0-0-0-0-0-0-0-0-0-0-0-0-0-0-0-0-0-0-0-0-0-0-0-0-0-0-0-1-0-0-0-0			18.1	0	0
480
481
482	TDP019	PGQHRISD	0-0-0-0-0-0-0-0-0-0-0-0-0-0-0-0-0-0-0-0-0-0-0-0-0-0-0-0-0-0-0-0-0-0-0-0-0-0-0-0-0-0-1-1-0-1-0-1-0-0-1-1			15.9	0	0
483	TDP019	GQHRISDA	0-0-0-0-0-0-0-0-0-0-0-0-0-0-0-0-0-0-0-0-0-0-0-0-0-0-0-0-0-0-0-0-0-0-0-0-0-0-0-0-0-0-1-1-0-0-0-1-1-0-1-1			24.2	0	0
484	TDP019	QHRISDAE	0-0-0-0-0-0-0-0-0-0-0-0-0-0-0-0-0-0-0-0-0-0-0-0-0-0-0-0-0-0-0-0-0-0-0-0-0-0-0-0-0-0-0-0-0-0-1-1-0-1-1-1			25.4	0	0
485	TDP019	HRISDAEL	0-0-0-1-1-0-0-0-0-1-0-0-0-0-0-0-0-0-0-0-0-0-0-0-0-0-0-0-0-0-0-0-0-0-0-0-0-0-0-0-1-1-2-1-1-1-1-3-0-1-1-1			26.2	0	0					HRISDAEL	HRISDAEL					HRISDAEL
486	TDP019	RISDAELX	1-1-1-1-1-1-1-1-1-1-1-1-1-1-1-1-1-1-1-2-1-1-1-1-1-1-2-1-1-1-1-1-1-1-1-1-1-1-1-1-1-1-1-1-1-1-2-2-1-1-2-0	3 times in 3 NECs		34.5	33.4	0		RISDAELX	RISDAELX	RISDAELX	RISDAELX	RISDAELX	RISDAELX	RISDAELX	RISDAELX	RISDAELX	RISDAELX	RISDAELX	RISDAELX	RISDAELX	RISDAELX	RISDAELX	RISDAELX	RISDAELX	RISDAELX	RISDAELX	RISDAELX	RISDAELX	RISDAELX	RISDAELX	RISDAELX	RISDAELX	RISDAELX	RISDAELX	RISDAELX	RISDAELX	RISDAELX	RISDAELX	RISDAELX	RISDAELX	RISDAELX	RISDAELX	RISDAELX	RISDAELX	RISDAELX	RISDAELX	RISDAELX
487	TDP019	ISDAELXX	0-1-1-1-2-0-1-0-1-1-0-0-1-1-0-0-0-0-0-0-0-0-0-0-0-0-0-0-0-0-0-0-0-0-0-0-0-0-0-0-0-0-0-0-0-0-0-0-0-0-0-1			29.9	0	0			ISDAELXX	ISDAELXX	ISDAELXX	ISDAELXX		ISDAELXX		ISDAELXX	ISDAELXX			ISDAELXX	ISDAELXX
488	TDP019	SDAELXXX	0-0-1-1-1-0-1-1-0-1-0-0-0-1-0-0-0-0-0-0-0-0-0-0-0-0-0-0-0-0-0-0-0-1-1-0-0-1-1-1-0-0-0-0-0-1-1-1-0-0-0-0			27	0	0				SDAELXXX	SDAELXXX	SDAELXXX		SDAELXXX	SDAELXXX		SDAELXXX				SDAELXXX																				SDAELXXX	SDAELXXX			SDAELXXX	SDAELXXX	SDAELXXX
489	TDP019	XXDMFPGQ	0-0-0-0-0-0-0-0-0-0-0-0-0-0-0-0-0-0-0-2-0-1-0-0-0-0-2-1-1-1-0-0-0-0-0-0-0-0-0-0-0-0-0-0-0-0-0-1-1-0-0-0			28.6	0	0																					XXDMFPGQ		XXDMFPGQ					XXDMFPGQ	XXDMFPGQ	XXDMFPGQ	XXDMFPGQ
490	TDP019	DMFPGQHR	0-0-0-0-0-0-0-0-0-0-0-0-0-0-0-0-0-0-0-0-0-0-0-0-0-0-0-0-0-0-0-0-0-0-0-0-0-0-0-0-0-0-0-1-0-0-1-0-0-0-0-1			17.2	0	0
491	TDP019	FPGQHRIS	0-0-0-0-0-0-0-0-0-0-0-0-0-0-0-0-0-0-0-0-0-0-0-0-0-0-0-0-0-0-0-0-0-0-0-0-0-0-0-0-0-0-0-1-0-0-1-1-0-0-1-1			24.6	0	0
492	TDP019	XXXDMFPG	0-0-0-0-1-0-0-0-0-0-0-0-0-0-0-0-0-0-0-0-0-0-0-0-0-0-0-0-0-0-0-0-0-0-0-0-0-0-0-0-0-0-1-0-0-0-2-2-0-0-1-0			23.3	0	0						XXXDMFPG
493	TDP019	XDMFPGQH	0-0-0-0-0-0-0-1-0-0-0-0-0-0-0-0-0-0-1-1-0-1-0-0-0-0-1-1-0-1-0-0-0-0-0-0-0-0-0-0-0-0-0-0-0-0-0-0-0-0-0-0			20.4	0	0									XDMFPGQH											XDMFPGQH	XDMFPGQH		XDMFPGQH					XDMFPGQH	XDMFPGQH		XDMFPGQH
494	TDP019	MFPGQHRI	0-0-0-0-0-0-0-0-0-0-0-0-0-0-0-0-0-0-0-0-0-0-0-0-0-0-0-0-0-0-0-0-0-0-0-0-0-0-0-0-0-0-0-1-0-0-0-1-0-0-0-0			20.3	0	0
495	--------
496	TDP019	DMFPGQHRISD^ael	1-1-1-1-1-1-1-1-1-1-1-1-1-1-1-1-1-1-1-1-1-1-1-1-1-1-1-1-1-1-1-1-1-1-1-1-1-1-1-1-1-1-1-1-1-1-1-1-1-1-1-0	3 times in 3 NECs		34.5	33.4	0
497	TDP019	DMFPGQHR^isdael	0-0-0-0-0-0-0-0-0-0-0-0-0-0-0-0-0-0-0-0-0-0-0-0-0-0-0-0-0-0-0-0-0-0-0-0-0-0-0-0-0-0-1-1-0-0-0-1-1-0-1-1			24.2	0	0
498	TDP019	DMFPGQHRISDA^el	0-1-1-1-1-0-1-0-1-1-0-0-1-1-0-0-0-0-0-0-0-0-0-0-0-0-0-0-0-0-0-0-0-0-0-0-0-0-0-0-0-0-0-0-0-0-0-0-0-0-0-1			29.9	0	0
499	TDP019	d^MFPGQHRIS^dael	0-0-0-0-0-0-0-0-0-0-0-0-0-0-0-0-0-0-0-0-0-0-0-0-0-0-0-0-0-0-0-0-0-0-0-0-0-0-0-0-0-0-1-0-0-0-0-1-0-0-0-0			23.3	0	0
500	TDP019	DMFPGQHRISDAE^l	0-0-1-1-1-0-1-1-0-1-0-0-0-1-0-0-0-0-0-0-0-0-0-0-0-0-0-0-0-0-0-0-0-1-1-0-0-1-1-1-0-0-0-0-0-1-1-1-0-0-0-0			27	0	0
501	TDP019	DMFPGQHRIS^dael	0-0-0-1-1-0-0-0-0-1-0-0-0-0-0-0-0-0-0-0-0-0-0-0-0-0-0-0-0-0-0-0-0-0-0-0-0-0-0-0-1-1-1-1-1-1-1-1-0-1-1-1			26.2	0	0
502	TDP019	DMFPGQH^risdael	0-0-0-0-0-0-0-0-0-0-0-0-0-0-0-0-0-0-0-0-0-0-0-0-0-0-0-0-0-0-0-0-0-0-0-0-0-0-0-0-0-0-1-1-0-1-0-1-0-0-1-1			15.9	0	0
503	TDP019	DMFPGQHRI^sdael	0-0-0-0-0-0-0-0-0-0-0-0-0-0-0-0-0-0-0-0-0-0-0-0-0-0-0-0-0-0-0-0-0-0-0-0-0-0-0-0-0-0-0-0-0-0-1-1-0-1-1-1			25.4	0	0
504	TDP019	d^MFPGQHRISDA^el	0-0-0-0-1-0-0-0-0-0-0-0-0-0-0-0-0-0-0-0-0-0-0-0-0-0-0-0-0-0-0-0-0-0-0-0-0-0-0-0-0-0-0-0-0-0-0-0-0-0-0-0			16.1	0	0
505	TDP019	d^MFPGQHRISD^ael	0-0-0-0-0-0-0-0-0-0-0-0-0-0-0-0-0-0-0-0-0-0-0-0-0-0-0-0-0-0-0-0-0-0-0-0-0-0-0-0-0-0-0-0-0-0-1-1-0-0-1-0			23	0	0
506	TDP019	DMFPGQHRISDAEL	1-1-1-1-1-1-1-1-1-0-1-1-1-1-1-1-1-1-1-1-1-1-1-1-1-0-1-1-1-1-1-1-1-1-1-1-1-1-1-1-1-1-1-0-1-1-1-0-1-1-1-1	3 times in 3 NECs		27.9	24.8	0
507	TDP019	dm^FPGQHRISD^ael	0-0-0-0-0-0-0-0-0-0-0-0-0-0-0-0-0-0-0-1-0-0-0-0-0-0-1-0-0-0-0-0-0-0-0-0-0-0-0-0-0-0-0-0-0-0-0-0-0-0-0-0			23.1	0	0
508	TDP019	dm^FPGQHRIS^dael	0-0-0-0-0-0-0-0-0-0-0-0-0-0-0-0-0-0-0-0-0-0-0-0-0-0-0-0-0-0-0-0-0-0-0-0-0-0-0-0-0-0-0-0-0-0-0-1-0-0-0-0			18.9	0	0
509	TDP019	dmf^PGQHRISDAEL	0-0-0-0-0-0-0-1-0-0-0-0-0-0-0-0-0-0-1-1-0-1-0-0-0-0-1-1-0-1-0-0-0-0-0-0-0-0-0-0-0-0-0-0-0-0-0-0-0-0-0-0			20.4	0	0
510	TDP019	dmfpgq^HRISDAEL	0-0-0-0-0-0-0-0-0-0-0-0-0-0-0-0-0-0-0-0-0-0-0-0-0-0-0-0-0-0-0-0-0-0-0-0-0-0-0-0-0-0-0-1-0-0-1-1-0-0-1-1			24.6	0	0
511	TDP019	dm^FPGQHRISDAEL	0-0-0-0-0-0-0-0-0-0-0-0-0-0-0-0-0-0-0-1-0-1-0-0-0-0-1-1-1-1-0-0-0-0-0-0-0-0-0-0-0-0-0-0-0-0-0-0-1-0-0-0			28.6	0	0
512	TDP019	dmfpg^QHRISDAEL	0-0-0-0-0-0-0-0-0-0-0-0-0-0-0-0-0-0-0-0-0-0-0-0-0-0-0-0-0-0-0-0-0-0-0-0-0-0-0-0-0-0-0-1-0-0-0-1-0-0-0-0			20.3	0	0
513	TDP019	d^MFPGQHRISDAEL	0-0-0-0-0-0-0-0-0-0-0-0-0-0-0-0-0-0-0-0-0-0-0-0-0-0-0-0-0-0-0-0-0-0-0-0-0-0-0-0-0-0-0-0-0-0-1-0-0-0-0-0			20.1	0	0
514	TDP019	dmfp^GQHRISDAEL	0-0-0-0-0-0-0-0-0-0-0-0-0-0-0-0-0-0-0-0-0-0-0-0-0-0-0-0-0-0-0-0-0-0-0-0-0-0-0-0-0-0-0-1-0-0-1-0-0-0-0-1			17.2	0	0
515
516
517	TDP020	XQMKKTLV	0-0-0-0-0-0-0-0-0-0-0-0-0-0-0-0-0-0-0-0-0-0-0-0-0-0-0-0-0-0-0-0-0-0-0-0-0-0-0-0-0-1-0-0-0-0-0-0-1-2-0-0			17.6	0	0
518	TDP020	LVMYNEWN	0-0-0-0-1-0-0-0-0-0-0-0-0-0-0-0-1-1-0-0-0-0-0-0-0-0-0-0-0-0-0-0-0-0-0-0-0-0-0-0-0-2-0-0-0-1-1-0-0-2-0-0			18.6	0	0						LVMYNEWN												LVMYNEWN	LVMYNEWN
519	TDP020	KKTLVMYN	0-0-0-0-0-0-0-0-0-0-0-0-0-0-0-0-0-0-0-0-0-0-0-0-0-0-0-0-0-0-0-0-0-0-0-0-0-0-0-0-0-0-0-0-0-0-1-0-0-0-0-0			15.8	0	0
520	TDP020	KTLVMYNE	0-0-0-0-0-0-0-0-0-0-0-0-0-0-0-0-0-0-0-0-0-0-0-0-0-0-0-0-0-0-0-0-0-0-0-0-0-0-0-0-0-0-0-0-0-0-1-0-0-0-0-0			16.2	0	0
521	TDP020	VMYNEWNL	0-0-0-0-1-0-0-0-0-1-0-0-0-0-0-0-0-0-0-0-0-0-0-0-0-0-0-0-0-0-0-0-0-0-0-0-0-0-0-0-0-0-0-0-0-0-0-0-0-0-0-0			16.5	0	0						VMYNEWNL					VMYNEWNL
522	TDP020	MYNEWNLX	0-0-0-1-1-0-0-0-0-0-0-0-0-0-0-0-0-0-0-0-0-0-0-0-0-0-0-0-0-0-0-0-0-0-0-0-0-0-0-0-0-0-0-0-0-0-0-0-0-0-0-0			16.9	0	0					MYNEWNLX	MYNEWNLX
523	TDP020	YNEWNLXX	0-0-0-0-0-0-0-0-0-0-0-0-0-0-0-0-0-0-0-0-0-0-0-0-0-0-0-0-0-0-0-0-0-0-0-0-0-0-0-0-1-1-0-0-0-0-1-0-1-1-0-0			19.2	0	0
524	--------
525	TDP020	QMKKTLVMYNEWNL	1-1-0-0-0-1-0-1-0-0-0-1-1-0-1-1-0-0-0-0-0-0-0-0-0-0-1-1-0-0-0-1-0-0-1-0-1-0-0-1-1-0-0-0-0-0-1-0-1-1-0-0	3 times in 3 NECs		19.2	20.8	0
526	TDP020	qmk^KTLVMYNEWNL	0-0-0-0-0-0-0-0-0-0-0-0-0-0-0-0-0-0-0-0-0-0-0-0-0-0-0-0-0-0-0-0-0-0-0-0-0-0-0-0-0-0-0-0-0-0-0-0-1-1-0-0			17.6	0	0
527	TDP020	QMKKTLVMYNEW^nl	0-0-0-0-0-0-0-0-0-0-0-0-0-0-0-0-0-0-0-0-0-0-0-0-0-0-0-0-0-0-0-0-0-0-0-0-0-0-0-0-1-1-0-0-0-0-1-0-1-1-0-0			19.2	0	0
528	TDP020	QMKKTLVMY^newnl	0-0-0-0-1-0-0-0-0-0-0-0-0-0-0-0-1-1-0-0-0-0-0-0-0-0-0-0-0-0-0-0-0-0-0-0-0-0-0-0-0-1-0-0-0-1-1-0-0-1-0-0			18.6	0	0
529	TDP020	QMKKTLVMYN^ewnl	0-0-0-0-1-0-0-0-0-1-0-0-0-0-0-0-0-0-0-0-0-0-0-0-0-0-0-0-0-0-0-0-0-0-0-0-0-0-0-0-0-0-0-0-0-0-0-0-0-0-0-0			16.5	0	0
530	TDP020	QMKKTLVMYNE^wnl	0-0-0-1-1-0-0-0-0-0-0-0-0-0-0-0-0-0-0-0-0-0-0-0-0-0-0-0-0-0-0-0-0-0-0-0-0-0-0-0-0-0-0-0-0-0-0-0-0-0-0-0			16.9	0	0
531	TDP020	QMKKTL^vmynewnl	0-0-0-0-0-0-0-0-0-0-0-0-0-0-0-0-0-0-0-0-0-0-0-0-0-0-0-0-0-0-0-0-0-0-0-0-0-0-0-0-0-0-0-0-0-0-1-0-0-0-0-0			15.8	0	0
532	TDP020	qmk^KTLVMY^newnl	0-0-0-0-0-0-0-0-0-0-0-0-0-0-0-0-0-0-0-0-0-0-0-0-0-0-0-0-0-0-0-0-0-0-0-0-0-0-0-0-0-1-0-0-0-0-0-0-0-1-0-0			16.1	0	0
533	TDP020	QMKKTLV^mynewnl	0-0-0-0-0-0-0-0-0-0-0-0-0-0-0-0-0-0-0-0-0-0-0-0-0-0-0-0-0-0-0-0-0-0-0-0-0-0-0-0-0-0-0-0-0-0-1-0-0-0-0-0			16.2	0	0
534
535
536	TDP021	XXPMEPHS	0-0-0-0-0-0-0-0-0-0-1-0-0-0-0-0-1-0-0-0-0-0-0-0-0-0-0-0-0-0-0-0-0-0-0-0-0-0-0-0-0-0-0-0-0-0-0-0-1-0-0-0			16.7	0	0												XXPMEPHS						XXPMEPHS
537	TDP021	PMEPHSKV	0-0-0-0-0-0-0-0-0-0-0-0-0-0-0-0-0-0-0-0-0-0-0-0-0-0-0-0-0-0-0-0-0-0-0-0-0-0-0-0-0-0-0-0-0-0-0-0-0-1-1-0			16.1	0	0
538	TDP021	EPHSKVNF	0-0-0-0-0-0-0-0-0-0-0-0-0-0-0-0-0-0-0-0-0-0-0-0-0-0-0-0-0-0-0-0-0-0-0-0-0-0-0-0-0-0-0-0-0-0-1-0-0-0-0-1			18.3	0	0
539	TDP021	XXXPMEPH	1-0-0-0-0-0-1-0-0-0-0-1-0-0-1-1-0-0-1-1-0-0-0-0-0-0-0-0-0-0-1-1-0-1-0-1-0-0-1-1-0-0-0-0-1-0-0-0-1-0-0-0			26.5	0	0		XXXPMEPH						XXXPMEPH					XXXPMEPH			XXXPMEPH	XXXPMEPH			XXXPMEPH	XXXPMEPH											XXXPMEPH	XXXPMEPH		XXXPMEPH		XXXPMEPH			XXXPMEPH	XXXPMEPH
540	TDP021	PHSKVNFQ	0-0-0-0-0-0-0-0-0-0-0-0-0-0-0-0-0-0-0-0-0-0-0-0-0-0-0-0-0-0-0-0-0-0-0-0-0-0-0-0-0-0-0-0-0-0-1-2-0-0-0-0			21.5	0	0
541	TDP021	HSKVNFQQ	0-0-0-0-0-0-0-0-0-0-0-0-0-0-0-0-0-0-0-0-0-0-0-0-0-0-0-0-0-0-0-0-0-0-0-0-0-0-0-0-0-0-0-1-0-0-1-1-0-0-1-1			24.6	0	0
542	TDP021	SKVNFQQH	0-0-0-0-1-0-0-0-0-1-0-0-1-0-0-0-1-0-0-0-0-0-0-0-0-0-0-0-0-0-0-0-0-0-0-0-0-0-0-0-0-0-1-1-0-0-1-1-0-1-1-1			22.6	0	0						SKVNFQQH					SKVNFQQH			SKVNFQQH				SKVNFQQH
543	TDP021	KVNFQQHI	1-1-1-1-1-1-1-1-0-0-1-1-1-0-1-1-1-0-1-1-1-0-0-0-0-0-1-0-0-0-0-0-1-0-0-0-0-1-0-1-1-1-1-0-1-1-1-1-1-1-1-0			27.2	0	0		KVNFQQHI	KVNFQQHI	KVNFQQHI	KVNFQQHI	KVNFQQHI	KVNFQQHI	KVNFQQHI	KVNFQQHI			KVNFQQHI	KVNFQQHI	KVNFQQHI		KVNFQQHI	KVNFQQHI	KVNFQQHI		KVNFQQHI	KVNFQQHI	KVNFQQHI						KVNFQQHI						KVNFQQHI					KVNFQQHI		KVNFQQHI
544	TDP021	VNFQQHIX	0-0-0-0-0-0-0-0-0-0-0-0-0-0-0-0-0-0-0-0-0-0-0-0-0-0-0-0-0-0-0-0-0-0-0-0-0-0-0-0-0-0-0-0-1-1-1-1-1-0-1-1			26.7	0	0
545	TDP021	FQQHIXXX	0-0-0-0-0-0-0-0-0-0-0-0-0-0-0-0-0-0-0-0-0-0-0-0-0-0-0-0-0-0-0-0-0-0-0-0-0-0-0-0-0-0-0-0-0-0-1-0-0-0-0-0			23.4	0	0
546	TDP021	MEPHSKVN	0-0-0-0-0-1-0-1-0-0-0-1-0-0-1-1-1-0-0-1-0-0-0-0-0-0-1-0-0-0-0-0-0-0-0-0-0-1-0-1-1-1-1-0-1-1-1-0-1-1-1-0			21.7	0	0							MEPHSKVN		MEPHSKVN				MEPHSKVN			MEPHSKVN	MEPHSKVN	MEPHSKVN			MEPHSKVN							MEPHSKVN											MEPHSKVN		MEPHSKVN
547	--------
548	TDP021	PMEPHSKVNFQQHI	1-1-1-1-1-1-1-1-1-1-1-1-1-1-1-1-1-1-1-1-1-1-1-1-1-1-1-1-1-1-1-1-1-1-1-1-1-1-1-1-1-1-1-0-1-1-1-0-1-1-1-0	3 times in 3 NECs		35.7	31.1	0
549	TDP021	PMEPHSKVNFQQH^i	0-0-0-0-0-0-0-0-0-0-0-0-0-0-0-0-0-0-0-0-0-0-0-0-0-0-0-0-0-0-0-0-0-0-0-0-0-0-0-0-0-0-0-0-0-0-1-0-0-0-0-0			23.4	0	0
550	TDP021	PMEPHSKVNF^qqhi	1-1-1-1-1-1-1-1-0-0-1-1-1-0-1-1-1-0-1-1-1-0-0-0-0-0-1-0-0-0-0-0-1-0-0-0-0-1-0-1-1-1-1-0-1-1-1-1-1-1-1-0			27.2	0	0
551	TDP021	p^MEPHSKVNFQQHI	1-0-0-0-0-0-1-0-0-0-0-1-0-0-1-1-0-0-1-1-0-0-0-0-0-0-0-0-0-0-1-1-0-1-0-1-0-0-1-1-0-0-0-0-1-0-0-0-1-0-0-0			26.5	0	0
552	TDP021	PMEPHSKVNFQ^qhi	0-0-0-0-0-0-0-0-0-0-0-0-0-0-0-0-0-0-0-0-0-0-0-0-0-0-0-0-0-0-0-0-0-0-0-0-0-0-0-0-0-0-0-0-1-1-1-1-1-0-1-1			26.7	0	0
553	TDP021	PMEPHSKV^nfqqhi	0-0-0-0-0-0-0-0-0-0-0-0-0-0-0-0-0-0-0-0-0-0-0-0-0-0-0-0-0-0-0-0-0-0-0-0-0-0-0-0-0-0-0-1-0-0-1-1-0-0-1-1			24.6	0	0
554	TDP021	PMEPHSKVN^fqqhi	0-0-0-0-1-0-0-0-0-1-0-0-1-0-0-0-1-0-0-0-0-0-0-0-0-0-0-0-0-0-0-0-0-0-0-0-0-0-0-0-0-0-1-1-0-0-1-1-0-1-1-1			22.6	0	0
555	TDP021	pm^EPHSKVNFQQHI	0-0-0-0-0-0-0-0-0-0-1-0-0-0-0-0-1-0-0-0-0-0-0-0-0-0-0-0-0-0-0-0-0-0-0-0-0-0-0-0-0-0-0-0-0-0-0-0-1-0-0-0			16.7	0	0
556	TDP021	pmeph^SKVNFQQHI	0-0-0-0-0-1-0-1-0-0-0-1-0-0-1-1-1-0-0-1-0-0-0-0-0-0-1-0-0-0-0-0-0-0-0-0-0-1-0-1-1-1-1-0-1-1-1-0-1-1-1-0			21.7	0	0
557	TDP021	pmephs^KVNFQQHI	0-0-0-0-0-0-0-0-0-0-0-0-0-0-0-0-0-0-0-0-0-0-0-0-0-0-0-0-0-0-0-0-0-0-0-0-0-0-0-0-0-0-0-0-0-0-1-0-0-0-0-0			18.3	0	0
558	TDP021	pmep^HSKVNFQQHI	0-0-0-0-0-0-0-0-0-0-0-0-0-0-0-0-0-0-0-0-0-0-0-0-0-0-0-0-0-0-0-0-0-0-0-0-0-0-0-0-0-0-0-0-0-0-0-0-0-1-1-0			16.1	0	0
559	TDP021	PMEPHSK^vnfqqhi	0-0-0-0-0-0-0-0-0-0-0-0-0-0-0-0-0-0-0-0-0-0-0-0-0-0-0-0-0-0-0-0-0-0-0-0-0-0-0-0-0-0-0-0-0-0-0-1-0-0-0-0			21.5	0	0
560	TDP021	pmephsk^VNFQQHI	0-0-0-0-0-0-0-0-0-0-0-0-0-0-0-0-0-0-0-0-0-0-0-0-0-0-0-0-0-0-0-0-0-0-0-0-0-0-0-0-0-0-0-0-0-0-1-1-0-0-0-0			17.2	0	0
561	TDP021	PMEPHS^kvnfqqhi	0-0-0-0-0-0-0-0-0-0-0-0-0-0-0-0-0-0-0-0-0-0-0-0-0-0-0-0-0-0-0-0-0-0-0-0-0-0-0-0-0-0-0-0-0-0-0-0-0-0-0-1			15.9	0	0
562
563
564	TDP022	XHMIALYW	0-0-0-0-0-0-0-0-0-0-0-0-0-0-0-0-0-0-0-0-0-0-0-0-0-0-0-0-0-0-0-0-0-0-0-0-0-0-0-0-0-0-0-0-0-1-0-0-0-0-0-0			15.2	0	0
565	TDP022	ALYWGRDT	0-0-0-0-0-0-0-0-0-0-0-0-0-0-0-0-0-0-0-0-0-0-0-0-0-0-0-0-0-0-0-0-0-0-0-0-0-0-0-0-0-0-0-0-0-0-0-0-1-1-0-0			15.8	0	0
566	TDP022	GRDTMFIX	0-0-0-1-1-0-0-0-0-2-0-0-0-1-0-0-0-0-0-0-0-0-0-0-0-0-0-0-0-0-0-0-0-0-0-0-0-0-0-0-0-0-0-0-0-0-0-0-0-0-0-0			17.4	0	0					GRDTMFIX	GRDTMFIX					GRDTMFIX				GRDTMFIX
567	TDP022	RDTMFIXX	0-0-0-1-2-0-1-0-1-1-0-1-1-2-0-0-0-0-0-0-0-0-0-0-0-0-0-0-0-0-0-0-0-0-0-0-0-0-0-0-2-2-0-0-2-2-2-1-2-3-0-0			26.6	0	0					RDTMFIXX	RDTMFIXX		RDTMFIXX		RDTMFIXX	RDTMFIXX		RDTMFIXX	RDTMFIXX	RDTMFIXX
568	TDP022	XXHMIALY	1-1-0-1-2-1-1-0-0-1-1-1-0-2-1-1-0-0-1-1-1-0-0-0-0-0-1-0-0-0-0-1-0-0-1-1-0-0-0-0-2-1-0-0-2-0-1-0-2-2-0-0	1 times in 3 NECs		25.7	24	0		XXHMIALY	XXHMIALY		XXHMIALY	XXHMIALY	XXHMIALY	XXHMIALY			XXHMIALY	XXHMIALY	XXHMIALY		XXHMIALY	XXHMIALY	XXHMIALY			XXHMIALY	XXHMIALY	XXHMIALY						XXHMIALY					XXHMIALY			XXHMIALY	XXHMIALY
569	TDP022	XXXHMIAL	0-0-0-0-0-0-0-0-0-0-0-0-0-0-0-0-0-0-0-0-0-0-0-0-0-0-0-0-0-0-0-0-0-0-0-0-0-0-0-0-0-0-0-0-0-1-0-0-0-0-0-0			20.2	0	0
570	TDP022	HMIALYWG	0-0-0-0-1-0-0-0-0-0-0-0-0-0-0-0-1-1-0-0-0-1-0-0-0-0-0-0-0-0-0-0-0-0-0-0-0-0-0-0-0-0-0-0-1-1-0-0-1-1-0-0			18.9	0	0						HMIALYWG												HMIALYWG	HMIALYWG				HMIALYWG
571	TDP022	IALYWGRD	0-0-0-0-0-0-0-0-0-0-0-0-0-0-0-0-1-0-0-0-0-0-0-0-0-0-0-0-0-0-0-0-0-0-0-0-0-0-0-0-0-1-0-0-0-1-0-0-1-1-0-0			16.5	0	0																		IALYWGRD
572	TDP022	MIALYWGR	0-0-1-1-0-0-0-0-0-0-0-0-0-1-0-0-0-1-0-0-0-0-0-0-0-0-0-0-0-0-0-0-0-0-0-0-0-0-0-0-0-0-0-0-0-0-1-0-0-0-0-0			21.5	0	0				MIALYWGR	MIALYWGR										MIALYWGR				MIALYWGR
573	--------
574	TDP022	hm^IALYWGRDTMFI	1-1-0-0-0-1-1-0-0-0-1-1-0-0-1-1-0-0-1-1-1-0-0-0-0-0-1-0-0-0-0-1-0-0-1-1-0-0-0-0-1-0-0-0-1-0-0-0-1-1-0-0	1 times in 3 NECs		25.7	24	0
575	TDP022	HMIALYWGRDTM^fi	0-0-0-1-0-0-1-0-1-1-0-1-1-1-0-0-0-0-0-0-0-0-0-0-0-0-0-0-0-0-0-0-0-0-0-0-0-0-0-0-1-1-0-0-1-1-1-1-1-1-0-0			26.6	0	0
576	TDP022	h^MIALYWGRDTM^fi	0-0-0-0-0-0-0-0-0-0-0-0-0-0-0-0-0-0-0-0-0-0-0-0-0-0-0-0-0-0-0-0-0-0-0-0-0-0-0-0-0-0-0-0-0-1-0-0-0-0-0-0			20.2	0	0
577	TDP022	HMIALYWGRDTMFI	0-0-0-0-0-0-0-0-0-0-0-0-0-0-0-0-0-0-0-0-0-0-0-0-0-0-0-0-0-0-0-0-0-0-0-0-0-0-0-0-0-0-0-0-0-1-0-0-1-0-0-0			17.2	0	0
578	TDP022	hm^IALYWGRDTM^fi	0-0-0-0-1-0-0-0-0-0-0-0-0-1-0-0-0-0-0-0-0-0-0-0-0-0-0-0-0-0-0-0-0-0-0-0-0-0-0-0-1-1-0-0-1-0-1-0-1-1-0-0			23.3	0	0
579	TDP022	HMIALYWGRDT^mfi	0-0-0-0-0-0-0-0-0-1-0-0-0-0-0-0-0-0-0-0-0-0-0-0-0-0-0-0-0-0-0-0-0-0-0-0-0-0-0-0-0-0-0-0-0-0-0-0-0-0-0-0			17.4	0	0
580	TDP022	hmialy^WGRDTMFI	0-0-0-0-0-0-0-0-0-0-0-0-0-0-0-0-1-0-0-0-0-0-0-0-0-0-0-0-0-0-0-0-0-0-0-0-0-0-0-0-0-1-0-0-0-1-0-0-1-1-0-0			16.5	0	0
581	TDP022	hmi^ALYWGRDTMFI	0-0-0-0-0-0-0-0-0-0-0-0-0-0-0-0-0-0-0-0-0-0-0-0-0-0-0-0-0-0-0-0-0-0-0-0-0-0-0-0-0-0-0-0-0-1-0-0-0-0-0-0			15.2	0	0
582	TDP022	hmia^LYWGRDTMFI	0-0-0-0-0-0-0-0-0-0-0-0-0-0-0-0-1-1-0-0-0-1-0-0-0-0-0-0-0-0-0-0-0-0-0-0-0-0-0-0-0-0-0-0-1-1-0-0-1-0-0-0			18.9	0	0
583	TDP022	hmial^YWGRDTMFI	0-0-1-1-0-0-0-0-0-0-0-0-0-1-0-0-0-1-0-0-0-0-0-0-0-0-0-0-0-0-0-0-0-0-0-0-0-0-0-0-0-0-0-0-0-0-1-0-0-0-0-0			21.5	0	0
584	TDP022	HMIALYW^grdtmfi	0-0-0-0-0-0-0-0-0-0-0-0-0-0-0-0-0-0-0-0-0-0-0-0-0-0-0-0-0-0-0-0-0-0-0-0-0-0-0-0-0-0-0-0-0-0-0-0-1-1-0-0			15.8	0	0
585	TDP022	hm^IALYWGRDT^mfi	0-0-0-1-1-0-0-0-0-1-0-0-0-1-0-0-0-0-0-0-0-0-0-0-0-0-0-0-0-0-0-0-0-0-0-0-0-0-0-0-0-0-0-0-0-0-0-0-0-0-0-0			16.4	0	0
586	TDP022	hmia^LYWGRDTM^fi	0-0-0-0-1-0-0-0-0-0-0-0-0-0-0-0-0-0-0-0-0-0-0-0-0-0-0-0-0-0-0-0-0-0-0-0-0-0-0-0-0-0-0-0-0-0-0-0-0-1-0-0			15.8	0	0
587
588
589	--------
590	TDP023	MGNNGSLEQDVWIA	0-0-0-0-0-0-0-0-0-0-0-0-0-0-0-0-0-0-0-0-0-0-1-0-0-0-0-0-0-0-1-0-0-0-0-0-0-0-0-0-0-1-0-0-0-0-0-0-0-0-0-0			15.2	0	0
591
592
593	TDP024	LGWHAMFR	0-0-0-0-0-0-0-0-0-0-0-0-0-0-0-0-0-0-0-0-0-0-0-0-0-0-0-0-0-0-0-0-0-0-0-0-0-0-0-0-0-0-0-0-1-0-1-0-1-1-0-0			16.8	0	0
594	TDP024	WHAMFRKY	0-1-0-0-0-0-0-0-0-0-0-0-0-0-0-0-1-1-0-0-0-0-0-0-0-0-0-0-0-0-0-0-0-0-0-0-0-0-0-0-0-1-0-0-0-1-0-0-1-0-0-0			15.5	0	0			WHAMFRKY															WHAMFRKY	WHAMFRKY
[truncated: 5,063 more rows]
[truncated: 12 more columns]

## Sheet: Negative
AHNAWMXX			Negative for iceLogo
AKEDQFPV			XXXLVATV
DLVDHIGP			XXLVATVY
EPPWVDSH			XLVATVYE
EWADGNHL			LVATVYEF
FYRDTXXX			VATVYEFG
[truncated: 2,786 more rows]

## Sheet: Positive Cleavages
Karina_F3.1_0005/Karina_F3.1	Karina_F3.1_0015/Karina_F3.1	Karina_F3.1_0060/Karina_F3.1	Karina_F3.1_0240/Karina_F3.1	Karina_F3.1_1200/Karina_F3.1	Karina_F3.2_0005/Karina_F3.2	Karina_F3.2_0015/Karina_F3.2	Karina_F3.2_0060/Karina_F3.2	Karina_F3.2_0240/Karina_F3.2	Karina_F3.2_1200/Karina_F3.2	Karina_F5.1_0015/Karina_F5.1	Karina_F5.1_0060/Karina_F5.1	Karina_F5.1_0240/Karina_F5.1	Karina_F5.1_1200/Karina_F5.1	Karina_F5.2_0015/Karina_F5.2	Karina_F5.2_0060/Karina_F5.2	Karina_F5.2_0240/Karina_F5.2	Karina_F5.2_1200/Karina_F5.2	Karina_F8.1_0015/Karina_F8.1	Karina_F8.1_0060/Karina_F8.1	Karina_F8.1_0240/Karina_F8.1	Karina_F8.1_1200/Karina_F8.1	Karina_F8.2_0015/Karina_F8.2	Karina_F8.2_0060/Karina_F8.2	Karina_F8.2_0240/Karina_F8.2	Karina_F8.2_1200/Karina_F8.2	Karina_F8.3_0015/Karina_F8.3	Karina_F8.3_0060/Karina_F8.3	Karina_F8.3_0240/Karina_F8.3	Karina_F8.3_1200/Karina_F8.3	Karina_L3.1_0005/Karina_L3.1	Karina_L3.1_0015/Karina_L3.1	Karina_L3.1_0060/Karina_L3.1	Karina_L3.1_0240/Karina_L3.1	Karina_L3.1_1200/Karina_L3.1	Karina_L3.2_0005/Karina_L3.2	Karina_L3.2_0015/Karina_L3.2	Karina_L3.2_0060/Karina_L3.2	Karina_L3.2_0240/Karina_L3.2	Karina_L3.2_1200/Karina_L3.2	Karina_L8.1_0015/Karina_L8.1	Karina_L8.1_0060/Karina_L8.1	Karina_L8.1_0240/Karina_L8.1	Karina_L8.1_1200/Karina_L8.1	Karina_L8.2_0015/Karina_L8.2	Karina_L8.2_0060/Karina_L8.2	Karina_L8.2_0240/Karina_L8.2	Karina_L8.2_1200/Karina_L8.2	Karina_L8.3_0015/Karina_L8.3	Karina_L8.3_0060/Karina_L8.3
[truncated: 1,528 more rows]
[truncated: 6 more columns]

[truncated: 9 more sheets: Cleavage Position, Cleavage Count, Position Template, Figure 1 pH3 15min, Figure 2 pH5 60min, Figure 3 pH8 240min, Figure 4 pH3 240min, Figure 5 L1 pH8 240min, Pearson correlation]
