# Supplementary material for: Activity profiling of peptidases in Angiostrongylus costaricensis first-stage larvae and adult worms
Source: PLoS Negl Trop Dis. 2018 Oct 31;12(10):e0006923. doi: 10.1371/journal.pntd.0006923 (PMC6231675; doi:10.1371/journal.pntd.0006923)
Supplement: S1 Table — (XLSX) [file pntd.0006923.s002.xlsx]

## Sheet: Planilha1
	FEMALE	pmol AMC/sec		MALE	pmol AMC/sec
		pH 5.0	pH 8.0		pH 5.0	pH 8.0
	Boc-Ala-Gly-Pro-Arg-AMC	784 ± 42,19	61 ± 4,51	Boc-Ala-Gly-Pro-Arg-AMC	603 ± 30,71	25 ± 2,45
	Boc-Leu-Arg-Arg-AMC	685 ± 31,98	11 ± 1,8	Boc-Leu-Arg-Arg-AMC	360 ± 18,90	0 + 0,22
	Suc-Gly-Pro-Leu-Gly-Pro-AMC	0 ± 0,12	874 ± 44,34	Suc-Gly-Pro-Leu-Gly-Pro-AMC	0 ± 0,18	604 ± 32,87
	Suc-Pro-Ser-Pro-AMC	76 ± 11,23	261 ± 17,23	Suc-Pro-Ser-Pro-AMC	49 ± 10,21	230 ± 25,87
	N-Succinyl-Ala-Pro-Ala-AMC	213 ± 22,12	0 + 0,13	Z-Ala-Ala-Asn-AMC	95 ± 16,89	0 ± 0,15
	Z-Ala-Ala-Asn-AMC	154 ± 12,78	0 + 0,10	Z-Val-Arg-AMC	0 ± 0,13	85 ± 19,35
	Z-Val-Arg-AMC	0 ± 0,009	202 ± 31,47	Z-Arg-Leu-Arg-Gly-Gly-AMC	0 ± 0,003	57 ± 7,37
	N-Benzoyl-Phe-Val-Arg-AMC	13 ± 2,09	54 ± 8,19	Z-Arg-Arg-AMC	0 ± 0,17	28 ± 1,37
	Suc-Leu-Leu-Val-Tyr-AMC	4 ± 1,2	57 ± 5,21	Suc-Leu-Tyr-AMC	0 ± 0,06	15 ± 2,12
	Z-Arg-Leu-Arg-Gly-Gly-AMC	0 ± 0,007	71 ± 9,27	Z-Ala-AMC	0 ± 0,18	17 ± 2,19
	Z-Arg-Arg-Leu-Arg-AMC	0 ± 0,002	48 ± 2,19	Suc-Leu-Leu-Val-Tyr-AMC	0 ± 0,02	27 ± 1,38
	Z-Ala-AMC	0 ± 0,06	38 ± 3,29	N-Benzoyl-Phe-Val-Arg-AMC	0 ± 0,02	0 ± 0,03
	Z-Arg-Arg-AMC	0 ± 0,05	40 ± 6,28	Z-Arg-Arg-Leu-Arg-AMC	0 ± 0,04	0 ± 0,02
	Suc-Leu-Tyr-AMC	0 ± 0,007	22 ± 0,23	N-Succinyl-Ala-Pro-Ala-AMC	0 ± 0,10	0 ± 0,21
	Z-Phe-Arg-AMC	0 + 0,04	0 + 0,02	Z-Phe-Arg-AMC	0 ± 0,15	0 ± 0,01
	Glutaryl-Gly-Arg-AMC	0 + 0,01	0 + 0,12	Glutaryl-Gly-Arg-AMC	0 ± 0,,9	0 ± 0,05
	Z-Ala-Val-Asn-AMC	0 + 0,02	0 ± 0,07	Z-Ala-Val-Asn-AMC	0 ± 0,04	0 ± 0,05
	Z-Phe-Ala-AMC	0 ± 0,02	0 + 0,05	Z-Phe-Ala-AMC	0 ± 0,04	0 ± 0,08
	Z-Val-Ala-Asp-AMC	0 ± 0,03	0 + 0,01	Z-Val-Ala-Asp-AMC	0 + 0,01	0 ± 0,07
