# Supplementary material for: Activity profiling of peptidases in Angiostrongylus costaricensis first-stage larvae and adult worms
Source: PLoS Negl Trop Dis. 2018 Oct 31;12(10):e0006923. doi: 10.1371/journal.pntd.0006923 (PMC6231675; doi:10.1371/journal.pntd.0006923)
Supplement: S2 Table — (XLSX) [file pntd.0006923.s003.xlsx]

## Sheet: Planilha1
	pH 8.0
	Female		Male
	H-X-AMC		H-X-AMC
	Aminoacid (X)	Activity (pmol AMC/sec)	Aminoacid (X)	Activity (pmol AMC/sec)
	Gly-Phe	669 ± 30,78	Gly-Phe	0 ± 0,009
	Tyr	6146 ± 78,90	Tyr	3787 ± 64,78
	Ala	121 ± 29,78	Ala	112 ± 17,87
	Arg	0 ± 0,07	Arg	0 ± 0,02
	Gly-Arg	0 ± 0,10	Gly-Arg	0 ± 0,008
