# Supplementary material for: Activity profiling of peptidases in Angiostrongylus costaricensis first-stage larvae and adult worms
Source: PLoS Negl Trop Dis. 2018 Oct 31;12(10):e0006923. doi: 10.1371/journal.pntd.0006923 (PMC6231675; doi:10.1371/journal.pntd.0006923)
Supplement: S3 Table — (XLSX) [file pntd.0006923.s004.xlsx]

## Sheet: Plan1
	pmol AMC/sec
L1	5.0	8.0
Suc-Leu-Leu-Val-Tyr-AMC	21 ± 3,29	5740 ± 52,97
Boc-Ala-Gly-Pro-Arg-AMC	351 ± 9,98	1076 ± 40,02
Z-Arg-Arg-Leu-Arg-AMC	197± 20,03	954 ± 39,20
Boc-Leu-Arg-Arg-AMC	191 ± 22,20	897 ± 31,02
Suc-Pro-Ser-Pro-AMC	0 ± 0,04	877 ± 38,29
Suc-Leu-Tyr-AMC	46 ± 6,82	380 ± 28,92
Suc-Gly-Pro-Leu-Gly-Pro-AMC	0 ± 0,01	271 ± 33,20
Glutaryl-Gly-Arg-AMC	0 ± 0,01	361 ± 31,91
Z-Phe-Arg-AMC	0 ± 0,05	186 ± 18,97
N-Benzoyl-Phe-Val-Arg-AMC	0 ± 0,03	174 ± 31,70
Z-Val-Arg-AMC	58 ± 4,67	37 ± 3,33
N-Succinyl-Ala-Pro-Ala-AMC	0 ± 0,06	46 ± 9,12
Z-Ala-Val-Asn-AMC	0 ± 0,01	37 ± 2,98
Z-Ala-AMC	0 ± 0,05	0 ± 0,03
Z-Phe-Ala-AMC	0 ± 0,05	0 ± 0,02
